# Supplementary material
Source: publisher figshare collection journal article supplement (https://gsajournals.figshare.com/ndownloader/files/22264944)
Supplement: Supplementary file 1 [file 22264944]

marker			X21RV1	X21RV5	X21RV16	X21RV19	X21RV28	X21RV30	X21RV31	X21RV33	X21RV37	X21RV38	X21RV40	X21RV51	X21RV52	X21RV55	X21RV60	X21RV61	X21RV62	X21RV65	X21RV70	X21RV81	X21RV82	X21RV83	X21RV93	X21RV95	X21RV96	X21RV97	X21RV101	X21RV103	X21RV113	X21RV114	X21RV115	X21RV122	X21RV130	X21RV131	X21RV136	X21RV137	X21RV138	X21RV143	X21RV162	X21RV163	X21RV166	X21RV179	X21RV181	X21RV185	X21RV186	X21RV188	X21RV195
1_47577	1	0	-	-	-	-	-	-	-	-	-	-	-	-	-	-	-	-	-	-	-	-	-	-	-	-	-	-	-	-	-	-	-	-	-	-	-	-	-	-	-	-	-	-	-	-	-	-	-
1_88300	1	5.00E-08	-	-	-	-	-	-	-	-	-	-	-	-	-	-	-	-	-	-	-	-	-	-	-	-	-	-	-	-	-	-	-	-	-	-	-	-	-	-	-	-	-	-	-	-	-	-	-
1_128116	1	1.00E-07	-	-	-	-	-	-	-	-	-	-	-	-	-	-	-	-	-	-	-	-	-	-	-	-	-	-	-	-	-	-	-	-	-	-	-	-	-	-	-	-	-	-	-	-	-	-	-
1_163492	1	1.50E-07	-	-	-	-	-	-	-	-	-	-	-	-	-	-	-	-	-	-	-	-	-	-	-	-	-	-	-	-	-	-	-	-	-	-	-	-	-	-	-	-	-	-	-	-	-	-	-
1_163569	1	2.00E-07	-	-	-	-	-	-	-	-	-	-	-	-	-	-	-	-	-	-	-	-	-	-	-	-	-	-	-	-	-	-	-	-	-	-	-	-	-	-	-	-	-	-	-	-	-	-	-
1_179753	1	2.50E-07	-	-	-	-	-	-	-	-	-	-	-	-	-	-	-	-	-	-	-	-	-	-	-	-	-	-	-	-	-	-	-	-	-	-	-	-	-	-	-	-	-	-	-	-	-	-	-
1_223306	1	3.00E-07	-	AA	-	BB	BB	BB	AA	AA	BB	AA	AA	-	-	-	-	-	-	-	-	-	-	-	AA	-	-	-	BB	-	-	-	-	-	-	-	-	BB	-	-	BB	BB	-	-	-	-	AA	-	AA
1_223800	1	3.50E-07	-	AA	-	BB	BB	BB	AA	AA	BB	AA	AA	-	-	-	-	-	-	-	-	-	-	-	AA	-	-	-	BB	-	-	-	-	-	-	-	-	BB	-	-	BB	BB	-	-	-	-	AA	-	AA
1_247850	1	0.562035269	-	AA	-	BB	BB	BB	AA	AA	BB	AA	AA	-	-	-	-	-	-	-	-	-	-	-	AA	-	-	-	BB	-	-	-	-	-	-	-	-	BB	-	-	BB	BB	-	-	-	-	AA	-	AA
1_248261	1	0.562035319	-	AA	-	BB	BB	BB	AA	AA	BB	AA	AA	-	-	-	-	-	-	-	-	-	-	-	AA	-	-	-	BB	-	-	-	-	-	-	-	-	BB	-	-	BB	BB	-	-	-	-	AA	-	AA
1_248737	1	0.562035369	-	AA	-	BB	BB	BB	AA	AA	BB	AA	AA	-	-	-	-	-	-	-	-	-	-	-	AA	-	-	-	BB	-	-	-	-	-	-	-	-	BB	-	-	BB	BB	-	-	-	-	AA	-	AA
1_254004	1	0.562035419	-	AA	-	BB	BB	BB	AA	AA	BB	AA	AA	-	-	-	-	-	-	-	-	-	-	-	AA	-	-	-	BB	-	-	-	-	-	-	-	-	BB	-	-	BB	BB	-	-	-	-	AA	-	AA
1_287160	1	0.562035469	-	-	-	-	-	-	-	-	-	-	-	-	-	-	-	-	-	-	-	-	-	-	-	-	-	-	-	-	-	-	-	-	-	-	-	-	-	-	-	-	-	-	-	-	-	-	-
1_291796	1	0.562035519	-	AA	-	BB	BB	BB	AA	AA	BB	AA	AA	-	-	-	-	-	-	-	-	-	-	-	AA	-	-	-	BB	-	-	-	-	-	-	-	-	BB	-	-	BB	BB	-	-	-	-	AA	-	AA
1_328445	1	0.562035569	-	AA	-	BB	BB	BB	AA	AA	BB	AA	AA	-	-	-	-	-	-	-	-	-	-	-	AA	-	-	-	BB	-	-	-	-	-	-	-	-	BB	-	-	BB	BB	-	-	-	-	AA	-	AA
1_349310	1	0.562035619	BB	AA	AA	BB	BB	BB	AA	AA	BB	AA	AA	AA	BB	AA	BB	BB	BB	BB	BB	BB	AA	AA	AA	AA	-	BB	BB	-	-	BB	BB	AA	BB	BB	BB	BB	BB	BB	BB	BB	BB	AA	BB	BB	AA	BB	AA
1_352602	1	0.562035669	BB	AA	AA	BB	BB	BB	AA	AA	BB	AA	AA	AA	BB	AA	BB	BB	BB	BB	BB	BB	AA	AA	AA	AA	-	BB	BB	-	-	BB	BB	AA	BB	BB	BB	BB	BB	BB	BB	-	BB	AA	BB	BB	AA	BB	-
1_353230	1	0.562035719	BB	AA	AA	BB	BB	BB	AA	AA	BB	AA	AA	AA	BB	AA	BB	BB	BB	BB	BB	BB	AA	AA	AA	AA	-	BB	BB	-	-	BB	BB	AA	BB	BB	BB	BB	BB	BB	BB	-	BB	AA	BB	BB	AA	BB	-
1_367150	1	0.562035769	BB	AA	AA	BB	BB	BB	AA	AA	BB	AA	AA	AA	BB	AA	BB	BB	BB	BB	BB	BB	AA	AA	AA	AA	-	BB	BB	-	-	BB	BB	AA	BB	BB	BB	BB	BB	BB	BB	-	BB	AA	BB	BB	AA	BB	-
1_427813	1	0.562035819	BB	AA	AA	BB	BB	BB	AA	AA	BB	AA	AA	AA	BB	AA	BB	BB	BB	BB	BB	BB	AA	AA	AA	AA	-	BB	BB	-	-	BB	BB	AA	BB	BB	BB	BB	BB	BB	BB	-	BB	AA	BB	BB	AA	BB	-
1_432102	1	0.562035869	BB	AA	AA	BB	BB	BB	AA	AA	BB	AA	AA	AA	BB	AA	BB	BB	BB	BB	BB	BB	AA	AA	AA	AA	-	BB	BB	-	-	BB	BB	AA	BB	BB	BB	BB	BB	BB	BB	-	BB	AA	BB	BB	AA	BB	-
1_436638	1	0.562035919	-	-	-	-	-	-	-	-	-	-	-	-	-	-	-	-	-	-	-	-	-	-	-	-	-	-	-	-	-	-	-	-	-	-	-	-	-	-	-	-	-	-	-	-	-	-	-
1_442244	1	0.562035969	-	-	-	-	-	-	-	-	-	-	-	-	-	-	-	-	-	-	-	-	-	-	-	-	-	-	-	-	-	-	-	-	-	-	-	-	-	-	-	-	-	-	-	-	-	-	-
1_495164	1	1.196181157	-	-	-	-	-	-	-	-	-	-	-	-	-	-	-	-	-	-	-	-	-	-	-	-	-	-	-	-	-	-	-	-	-	-	-	-	-	-	-	-	-	-	-	-	-	-	-
1_514894	1	1.704482409	BB	AA	AA	BB	BB	BB	AA	AA	BB	AA	AA	AA	BB	AA	BB	BB	BB	BB	BB	BB	AA	AA	AA	AA	-	BB	BB	-	-	BB	BB	AA	BB	BB	BB	BB	BB	BB	BB	-	BB	AA	BB	BB	AA	BB	-
1_522223	1	1.704482459	BB	AA	AA	BB	BB	BB	AA	AA	BB	AA	AA	AA	BB	AA	BB	BB	BB	BB	BB	BB	AA	AA	AA	AA	-	BB	BB	-	-	BB	BB	AA	BB	BB	BB	BB	BB	BB	BB	-	BB	AA	BB	BB	AA	BB	-
1_526370	1	1.704482509	BB	AA	AA	BB	BB	BB	AA	AA	BB	AA	AA	AA	BB	AA	BB	BB	BB	BB	BB	BB	AA	AA	AA	AA	-	BB	BB	-	-	BB	BB	AA	BB	BB	BB	BB	BB	BB	BB	-	BB	AA	BB	BB	AA	BB	-
1_562761	1	1.704482559	-	-	-	-	-	-	-	-	-	-	-	-	-	-	-	-	-	-	-	-	-	-	-	-	-	-	-	-	-	-	-	-	-	-	-	-	-	-	-	-	-	-	-	-	-	-	-
1_568924	1	1.704482609	-	-	-	-	-	-	-	-	-	-	-	-	-	-	-	-	-	-	-	-	-	-	-	-	-	-	-	-	-	-	-	-	-	-	-	-	-	-	-	-	-	-	-	-	-	-	-
1_581476	1	1.704482659	BB	AA	AA	BB	BB	BB	AA	AA	BB	AA	AA	AA	BB	AA	BB	BB	BB	BB	BB	BB	AA	AA	AA	AA	-	BB	BB	-	-	BB	BB	AA	BB	BB	BB	BB	BB	BB	BB	-	BB	AA	BB	BB	AA	BB	-
1_589688	1	1.704482709	BB	AA	AA	BB	BB	BB	AA	AA	BB	AA	AA	AA	BB	AA	BB	BB	BB	BB	BB	BB	AA	AA	AA	AA	-	BB	BB	-	-	BB	BB	AA	BB	BB	BB	BB	BB	BB	BB	-	BB	AA	BB	BB	AA	BB	-
1_599650	1	2.372246258	BB	AA	AA	BB	BB	BB	AA	AA	BB	AA	-	AA	BB	AA	BB	BB	BB	BB	BB	BB	AA	AA	AA	AA	AA	BB	BB	AA	BB	-	BB	AA	BB	BB	BB	BB	BB	BB	BB	AA	BB	AA	-	BB	AA	BB	BB
1_604664	1	2.372246308	-	-	-	-	-	-	-	-	-	-	-	-	-	-	-	-	-	-	-	-	-	-	-	-	-	-	-	-	-	-	-	-	-	-	-	-	-	-	-	-	-	-	-	-	-	-	-
1_627062	1	2.372246358	BB	AA	AA	BB	BB	BB	AA	AA	BB	AA	-	AA	BB	AA	BB	BB	BB	BB	BB	BB	AA	AA	AA	AA	AA	BB	BB	AA	BB	-	BB	AA	BB	BB	BB	BB	BB	BB	BB	AA	BB	AA	-	BB	AA	BB	BB
1_628630	1	2.372246408	BB	AA	AA	BB	BB	BB	AA	AA	BB	AA	-	AA	BB	AA	BB	BB	BB	BB	BB	BB	AA	AA	AA	AA	AA	BB	BB	AA	BB	-	BB	AA	BB	BB	BB	BB	BB	BB	BB	AA	BB	AA	-	BB	AA	BB	BB
1_635670	1	2.372246458	BB	AA	AA	BB	BB	BB	AA	AA	BB	AA	-	AA	BB	AA	BB	BB	BB	BB	BB	BB	AA	AA	AA	AA	AA	BB	BB	AA	BB	-	BB	AA	BB	BB	BB	BB	BB	BB	BB	AA	BB	AA	-	BB	AA	BB	BB
1_638653	1	2.372246508	BB	AA	AA	BB	BB	BB	AA	AA	BB	AA	-	AA	BB	AA	BB	BB	BB	BB	BB	BB	AA	AA	AA	AA	AA	BB	BB	AA	BB	-	BB	AA	BB	BB	BB	BB	BB	BB	BB	AA	BB	AA	-	BB	AA	BB	BB
1_652281	1	2.372246558	BB	AA	AA	BB	BB	BB	AA	AA	BB	AA	-	AA	BB	AA	BB	BB	BB	BB	BB	BB	AA	AA	AA	AA	AA	BB	BB	AA	BB	-	BB	AA	BB	BB	BB	BB	BB	BB	BB	AA	BB	AA	-	BB	AA	BB	BB
1_674586	1	2.372246608	BB	AA	AA	BB	BB	BB	AA	AA	BB	AA	-	AA	BB	AA	BB	BB	BB	BB	BB	BB	AA	AA	AA	AA	AA	BB	BB	AA	BB	-	BB	AA	BB	BB	BB	BB	BB	BB	BB	AA	BB	AA	-	BB	AA	BB	BB
1_681653	1	2.503318803	BB	AA	AA	BB	BB	BB	AA	AA	BB	AA	-	AA	BB	AA	BB	BB	BB	BB	BB	BB	AA	AA	AA	AA	AA	BB	BB	AA	BB	-	BB	AA	BB	BB	BB	BB	BB	BB	BB	AA	BB	AA	-	BB	AA	BB	BB
1_683186	1	2.503318853	BB	AA	AA	BB	BB	BB	AA	AA	BB	AA	-	AA	BB	AA	BB	BB	BB	BB	BB	BB	AA	AA	AA	AA	AA	BB	BB	AA	BB	-	BB	AA	BB	BB	BB	BB	BB	BB	BB	AA	BB	AA	-	BB	AA	BB	BB
1_706920	1	2.503318903	BB	AA	AA	BB	BB	BB	AA	AA	BB	AA	-	AA	BB	AA	BB	BB	BB	BB	BB	BB	AA	AA	AA	AA	AA	BB	BB	AA	BB	-	BB	AA	BB	BB	BB	BB	BB	BB	BB	AA	BB	AA	-	BB	AA	BB	BB
1_748146	1	2.503318953	BB	AA	AA	BB	BB	BB	AA	AA	BB	AA	-	AA	BB	AA	BB	BB	BB	BB	BB	BB	AA	AA	AA	AA	AA	BB	BB	AA	BB	-	BB	AA	BB	BB	BB	BB	BB	BB	BB	AA	BB	AA	-	BB	AA	BB	BB
1_762875	1	2.503319003	-	-	-	-	-	-	-	-	-	-	-	-	-	-	-	-	-	-	-	-	-	-	-	-	-	-	-	-	-	-	-	-	-	-	-	-	-	-	-	-	-	-	-	-	-	-	-
1_775649	1	2.503319053	BB	AA	AA	BB	BB	BB	AA	AA	BB	AA	-	AA	BB	AA	BB	BB	BB	BB	BB	BB	AA	AA	AA	AA	AA	BB	BB	AA	BB	-	BB	AA	BB	BB	BB	BB	BB	BB	BB	AA	BB	AA	-	BB	AA	BB	BB
1_788873	1	2.503319103	BB	AA	AA	BB	BB	BB	AA	AA	BB	AA	-	AA	BB	AA	BB	BB	BB	BB	BB	BB	AA	AA	AA	AA	AA	BB	BB	AA	BB	-	BB	AA	BB	BB	BB	BB	BB	BB	BB	AA	BB	AA	-	BB	AA	BB	BB
1_789353	1	2.503319153	-	-	-	-	-	-	-	-	-	-	-	-	-	-	-	-	-	-	-	-	-	-	-	-	-	-	-	-	-	-	-	-	-	-	-	-	-	-	-	-	-	-	-	-	-	-	-
1_791439	1	2.503319203	BB	AA	AA	BB	BB	BB	AA	AA	BB	AA	-	AA	BB	AA	BB	BB	BB	BB	BB	BB	AA	AA	AA	AA	AA	BB	BB	AA	BB	-	BB	AA	BB	BB	BB	BB	BB	BB	BB	AA	BB	AA	-	BB	AA	BB	BB
1_796471	1	2.503319253	BB	AA	AA	BB	BB	BB	AA	AA	BB	AA	-	AA	BB	AA	BB	BB	BB	BB	BB	BB	AA	AA	AA	AA	AA	BB	BB	AA	BB	-	BB	AA	BB	BB	BB	BB	BB	BB	BB	AA	BB	AA	-	BB	AA	BB	BB
1_818672	1	2.503319303	BB	AA	AA	BB	BB	BB	AA	AA	BB	AA	-	AA	BB	AA	BB	BB	BB	BB	BB	BB	AA	AA	AA	AA	AA	BB	BB	AA	BB	-	BB	AA	BB	BB	BB	BB	BB	BB	BB	AA	BB	AA	-	BB	AA	BB	BB
1_828756	1	2.503319353	BB	AA	AA	BB	BB	BB	AA	AA	BB	AA	-	AA	BB	AA	BB	BB	BB	BB	BB	BB	AA	AA	AA	AA	AA	BB	BB	AA	BB	-	BB	AA	BB	BB	BB	BB	BB	BB	BB	AA	BB	AA	-	BB	AA	BB	BB
1_830155	1	2.503319403	BB	AA	AA	BB	BB	BB	AA	AA	BB	AA	-	AA	BB	AA	BB	BB	BB	BB	BB	BB	AA	AA	AA	AA	AA	BB	BB	AA	BB	-	BB	AA	BB	BB	BB	BB	BB	BB	BB	AA	BB	AA	-	BB	AA	BB	BB
1_846926	1	2.503319453	BB	AA	AA	BB	BB	BB	AA	AA	BB	AA	-	AA	BB	AA	BB	BB	BB	BB	BB	BB	AA	AA	AA	AA	AA	BB	BB	AA	BB	-	BB	AA	BB	BB	BB	BB	BB	BB	BB	AA	BB	AA	-	BB	AA	BB	BB
1_932541	1	2.503319503	BB	AA	AA	BB	BB	BB	AA	AA	BB	AA	-	AA	BB	AA	BB	BB	BB	BB	BB	BB	AA	AA	AA	AA	AA	BB	BB	AA	BB	-	BB	AA	BB	BB	BB	BB	BB	BB	BB	AA	BB	AA	-	BB	AA	BB	BB
1_956687	1	3.724250564	BB	AA	AA	BB	BB	BB	AA	AA	BB	AA	BB	AA	BB	AA	BB	BB	BB	BB	BB	BB	AA	AA	AA	AA	AA	BB	BB	AA	BB	AA	BB	AA	BB	BB	BB	BB	BB	BB	BB	AA	BB	AA	AA	BB	AA	BB	BB
1_994290	1	3.724250614	BB	AA	AA	BB	BB	BB	AA	AA	BB	AA	BB	AA	BB	AA	BB	BB	BB	BB	BB	BB	AA	AA	AA	AA	AA	BB	BB	AA	BB	AA	BB	AA	BB	BB	BB	BB	BB	BB	BB	AA	BB	AA	AA	BB	AA	BB	BB
1_1070461	1	3.724250664	BB	AA	AA	BB	BB	BB	AA	AA	BB	AA	BB	AA	BB	AA	BB	BB	BB	BB	BB	BB	AA	AA	AA	AA	AA	BB	BB	AA	BB	AA	BB	AA	BB	BB	BB	BB	BB	BB	BB	AA	BB	AA	AA	BB	AA	BB	BB
1_1123730	1	3.724250714	BB	AA	AA	BB	BB	BB	AA	AA	BB	AA	BB	AA	BB	AA	BB	BB	BB	BB	BB	BB	AA	AA	AA	AA	AA	BB	BB	AA	BB	AA	BB	AA	BB	BB	BB	BB	BB	BB	BB	AA	BB	AA	AA	BB	AA	BB	BB
1_1129780	1	3.724250764	BB	AA	AA	BB	BB	BB	AA	AA	BB	AA	BB	AA	BB	AA	BB	BB	BB	BB	BB	BB	AA	AA	AA	AA	AA	BB	BB	AA	BB	AA	BB	AA	BB	BB	BB	BB	BB	BB	BB	AA	BB	AA	AA	BB	AA	BB	BB
1_1129980	1	3.724250814	BB	AA	AA	BB	BB	BB	AA	AA	BB	AA	BB	AA	BB	AA	BB	BB	BB	BB	BB	BB	AA	AA	AA	AA	AA	BB	BB	AA	BB	AA	BB	AA	BB	BB	BB	BB	BB	BB	BB	AA	BB	AA	AA	BB	AA	BB	BB
1_1131884	1	3.724250864	BB	AA	AA	BB	BB	BB	AA	AA	BB	AA	BB	AA	BB	AA	BB	BB	BB	BB	BB	BB	AA	AA	AA	AA	AA	BB	BB	AA	BB	AA	BB	AA	BB	BB	BB	BB	BB	BB	BB	AA	BB	AA	AA	BB	AA	BB	BB
1_1158573	1	4.31089001	BB	AA	AA	BB	BB	BB	AA	AA	BB	AA	BB	AA	BB	AA	BB	BB	BB	BB	BB	BB	AA	AA	AA	AA	AA	BB	BB	AA	BB	AA	BB	AA	BB	BB	BB	BB	BB	BB	BB	AA	BB	AA	AA	BB	AA	BB	BB
1_1162222	1	4.485180812	BB	AA	AA	BB	BB	BB	AA	AA	BB	AA	BB	AA	BB	AA	BB	BB	BB	BB	BB	BB	AA	AA	AA	AA	AA	BB	BB	AA	BB	AA	BB	AA	BB	BB	BB	BB	BB	BB	BB	AA	BB	AA	AA	BB	AA	BB	BB
1_1167844	1	4.485180862	BB	AA	AA	BB	BB	BB	AA	AA	BB	AA	BB	AA	BB	AA	BB	BB	BB	BB	BB	BB	AA	AA	AA	AA	AA	BB	BB	AA	BB	AA	BB	AA	BB	BB	BB	BB	BB	BB	BB	AA	BB	AA	AA	BB	AA	BB	BB
1_1189375	1	4.485180912	BB	AA	AA	BB	BB	BB	AA	AA	BB	AA	BB	AA	BB	AA	BB	BB	BB	BB	BB	BB	AA	AA	AA	AA	AA	BB	BB	AA	BB	AA	BB	AA	BB	BB	BB	BB	BB	BB	BB	AA	BB	AA	AA	BB	AA	BB	BB
1_1201049	1	4.485180962	BB	AA	AA	BB	BB	BB	AA	AA	BB	AA	BB	AA	BB	AA	BB	BB	BB	BB	BB	BB	AA	AA	AA	AA	AA	BB	BB	AA	BB	AA	BB	AA	BB	BB	BB	BB	BB	BB	BB	AA	BB	AA	AA	BB	AA	BB	BB
1_1203627	1	4.485181012	BB	AA	AA	BB	BB	BB	AA	AA	BB	AA	BB	AA	BB	AA	BB	BB	BB	BB	BB	BB	AA	AA	AA	AA	AA	BB	BB	AA	BB	AA	BB	AA	BB	BB	BB	BB	BB	BB	BB	AA	BB	AA	AA	BB	AA	BB	BB
1_1208938	1	4.485181062	BB	AA	AA	BB	BB	BB	AA	AA	BB	AA	BB	AA	BB	AA	BB	BB	BB	BB	BB	BB	AA	AA	AA	AA	AA	BB	BB	AA	BB	AA	BB	AA	BB	BB	BB	BB	BB	BB	BB	AA	BB	AA	AA	BB	AA	BB	BB
1_1219320	1	4.485181112	BB	AA	AA	BB	BB	BB	AA	AA	BB	AA	BB	AA	BB	AA	BB	BB	BB	BB	BB	BB	AA	AA	AA	AA	AA	BB	BB	AA	BB	AA	BB	AA	BB	BB	BB	BB	BB	BB	BB	AA	BB	AA	AA	BB	AA	BB	BB
1_1241208	1	4.485181162	BB	AA	AA	BB	BB	BB	AA	AA	BB	AA	BB	AA	BB	AA	BB	BB	BB	BB	BB	BB	AA	AA	AA	AA	AA	BB	BB	-	BB	AA	BB	AA	BB	BB	BB	BB	BB	BB	BB	AA	BB	AA	AA	BB	AA	BB	BB
1_1256134	1	4.485181212	BB	AA	AA	BB	BB	BB	AA	AA	BB	AA	BB	AA	BB	AA	BB	BB	BB	BB	BB	BB	AA	AA	AA	AA	AA	BB	BB	-	BB	AA	BB	AA	BB	BB	BB	BB	BB	BB	BB	AA	BB	AA	AA	BB	AA	BB	BB
1_1273049	1	4.485181262	-	-	-	-	-	-	-	-	-	-	-	-	-	-	-	-	-	-	-	-	-	-	-	-	-	-	-	-	-	-	-	-	-	-	-	-	-	-	-	-	-	-	-	-	-	-	-
1_1282314	1	5.138163405	BB	AA	AA	BB	BB	BB	AA	AA	BB	AA	BB	AA	BB	AA	BB	BB	BB	BB	BB	BB	AA	AA	AA	AA	AA	BB	BB	-	BB	AA	BB	AA	BB	BB	BB	BB	BB	BB	BB	AA	BB	AA	AA	BB	AA	BB	BB
1_1286972	1	5.138163455	BB	AA	AA	BB	BB	BB	AA	AA	BB	AA	BB	AA	BB	AA	BB	BB	BB	BB	BB	BB	AA	AA	AA	AA	AA	BB	BB	-	BB	AA	BB	AA	BB	BB	BB	BB	BB	BB	BB	AA	BB	AA	AA	BB	AA	BB	BB
1_1291664	1	5.138163505	BB	AA	AA	BB	BB	BB	AA	AA	BB	AA	BB	AA	BB	AA	BB	BB	BB	BB	BB	BB	AA	AA	AA	AA	AA	BB	BB	-	BB	AA	BB	AA	BB	BB	BB	BB	BB	BB	BB	AA	BB	AA	AA	BB	AA	BB	BB
1_1309215	1	5.138163555	-	-	-	-	-	-	-	-	-	-	-	-	-	-	-	-	-	-	-	-	-	-	-	-	-	-	-	-	-	-	-	-	-	-	-	-	-	-	-	-	-	-	-	-	-	-	-
1_1322237	1	5.138163605	-	-	-	-	-	-	-	-	-	-	-	-	-	-	-	-	-	-	-	-	-	-	-	-	-	-	-	-	-	-	-	-	-	-	-	-	-	-	-	-	-	-	-	-	-	-	-
1_1337615	1	5.138163655	BB	AA	AA	BB	BB	BB	AA	AA	BB	AA	BB	AA	BB	AA	BB	BB	BB	BB	BB	BB	AA	AA	AA	AA	AA	BB	BB	-	BB	AA	BB	AA	BB	BB	BB	BB	BB	BB	BB	AA	BB	AA	AA	BB	AA	BB	BB
1_1371005	1	5.138163705	BB	AA	AA	BB	BB	BB	AA	AA	BB	AA	BB	AA	BB	AA	BB	BB	BB	BB	BB	BB	AA	AA	AA	AA	AA	BB	BB	-	BB	AA	BB	AA	BB	BB	BB	BB	BB	BB	BB	AA	BB	AA	AA	BB	AA	BB	BB
1_1393031	1	5.138163755	BB	AA	AA	BB	BB	BB	AA	AA	BB	AA	BB	AA	BB	AA	BB	BB	BB	BB	BB	BB	AA	AA	AA	AA	AA	BB	BB	BB	BB	AA	BB	AA	BB	BB	BB	BB	BB	BB	BB	AA	BB	AA	AA	BB	AA	BB	BB
1_1397466	1	5.138163805	BB	AA	AA	BB	BB	BB	AA	AA	BB	AA	BB	AA	BB	AA	BB	BB	BB	BB	BB	BB	AA	AA	AA	AA	AA	BB	BB	BB	BB	AA	BB	AA	BB	BB	BB	BB	BB	BB	BB	AA	BB	AA	AA	BB	AA	BB	BB
1_1398240	1	5.138163855	BB	AA	AA	BB	BB	BB	AA	AA	BB	AA	BB	AA	BB	AA	BB	-	BB	BB	BB	BB	AA	AA	AA	AA	AA	BB	BB	BB	BB	AA	BB	AA	-	BB	BB	BB	BB	BB	BB	AA	BB	AA	AA	BB	AA	BB	BB
1_1423970	1	5.138163905	BB	AA	AA	BB	BB	BB	AA	AA	BB	AA	BB	AA	BB	AA	BB	-	BB	BB	BB	BB	AA	AA	AA	AA	AA	BB	BB	BB	BB	AA	BB	AA	-	BB	BB	BB	BB	BB	BB	AA	BB	AA	AA	BB	AA	BB	BB
1_1426755	1	5.138163955	BB	AA	AA	BB	BB	BB	AA	AA	BB	AA	BB	AA	BB	AA	BB	-	BB	BB	BB	BB	AA	AA	AA	AA	AA	BB	BB	BB	BB	AA	BB	AA	-	BB	BB	BB	BB	BB	BB	AA	BB	AA	AA	BB	AA	BB	BB
1_1430179	1	5.138164005	BB	AA	AA	BB	BB	BB	AA	AA	BB	AA	BB	AA	BB	AA	BB	-	BB	BB	BB	BB	AA	AA	AA	AA	AA	BB	BB	BB	BB	AA	BB	AA	-	BB	BB	BB	BB	BB	BB	AA	BB	AA	AA	BB	AA	BB	BB
1_1431611	1	5.138164055	BB	AA	AA	BB	BB	BB	AA	AA	BB	AA	BB	AA	BB	AA	BB	-	BB	BB	BB	BB	AA	AA	AA	AA	AA	BB	BB	BB	BB	AA	BB	AA	-	BB	BB	BB	BB	BB	BB	AA	BB	AA	AA	BB	AA	BB	BB
1_1460528	1	5.616991193	BB	AA	AA	BB	BB	BB	AA	AA	BB	AA	BB	AA	BB	AA	BB	-	BB	BB	BB	BB	AA	AA	AA	AA	AA	BB	BB	BB	BB	AA	BB	AA	-	BB	BB	BB	BB	BB	BB	AA	BB	AA	AA	BB	AA	BB	BB
1_1461089	1	5.616991243	BB	AA	AA	BB	BB	BB	AA	AA	BB	AA	BB	AA	BB	AA	BB	-	BB	BB	BB	BB	AA	AA	AA	AA	AA	BB	BB	BB	BB	AA	BB	AA	-	BB	BB	BB	BB	BB	BB	AA	BB	AA	AA	BB	AA	BB	BB
1_1476349	1	5.616991293	BB	AA	AA	BB	BB	BB	AA	AA	BB	AA	BB	AA	BB	AA	BB	-	BB	BB	BB	BB	AA	AA	AA	AA	AA	BB	BB	BB	BB	AA	BB	AA	-	BB	BB	BB	BB	BB	BB	AA	BB	AA	AA	BB	AA	BB	BB
1_1481694	1	5.616991343	BB	AA	AA	BB	BB	BB	AA	AA	BB	AA	BB	AA	BB	AA	BB	-	BB	BB	BB	BB	AA	AA	AA	AA	AA	BB	BB	BB	BB	AA	BB	AA	-	BB	BB	BB	BB	BB	BB	AA	BB	AA	AA	BB	AA	BB	BB
1_1482743	1	5.616991393	BB	AA	AA	BB	BB	BB	AA	AA	BB	AA	BB	AA	BB	AA	BB	AA	BB	BB	BB	BB	AA	AA	AA	AA	AA	BB	BB	BB	BB	AA	BB	AA	-	BB	BB	BB	BB	BB	BB	AA	BB	AA	AA	BB	AA	BB	BB
1_1504509	1	5.616991443	BB	AA	AA	BB	BB	BB	AA	AA	BB	AA	BB	AA	BB	AA	BB	AA	BB	BB	BB	BB	AA	AA	AA	AA	AA	BB	BB	BB	BB	AA	BB	AA	-	BB	BB	BB	BB	BB	BB	AA	BB	AA	AA	BB	AA	BB	BB
1_1538318	1	5.616991493	BB	AA	AA	BB	BB	BB	AA	AA	BB	AA	BB	AA	BB	AA	BB	AA	BB	BB	BB	BB	AA	AA	AA	AA	AA	BB	BB	BB	BB	AA	BB	AA	-	BB	BB	BB	BB	BB	BB	AA	BB	AA	AA	BB	AA	BB	BB
1_1543645	1	5.616991543	BB	AA	AA	BB	BB	BB	AA	AA	BB	AA	BB	AA	BB	AA	BB	AA	BB	BB	BB	BB	AA	AA	AA	AA	AA	BB	BB	BB	BB	AA	BB	AA	-	BB	BB	BB	BB	BB	BB	AA	BB	AA	AA	BB	AA	BB	BB
1_1548555	1	5.616991593	BB	AA	AA	BB	BB	BB	AA	AA	BB	AA	BB	AA	BB	AA	BB	AA	BB	BB	BB	BB	AA	AA	AA	AA	AA	BB	BB	BB	BB	AA	BB	AA	-	BB	BB	BB	BB	BB	BB	AA	BB	AA	AA	BB	AA	BB	BB
1_1549701	1	5.616991643	BB	AA	AA	BB	BB	BB	AA	AA	BB	AA	BB	AA	BB	AA	BB	AA	BB	BB	BB	BB	AA	AA	AA	AA	AA	BB	BB	BB	BB	AA	BB	AA	-	BB	BB	BB	BB	BB	BB	AA	BB	AA	AA	BB	AA	BB	BB
1_1550351	1	5.616991693	BB	AA	AA	BB	BB	BB	AA	AA	BB	AA	BB	AA	BB	AA	BB	AA	BB	BB	BB	BB	AA	AA	AA	AA	AA	BB	BB	BB	BB	AA	BB	AA	-	BB	BB	BB	BB	BB	BB	AA	BB	AA	AA	BB	AA	BB	BB
1_1550655	1	5.616991743	BB	AA	AA	BB	BB	BB	AA	AA	BB	AA	BB	AA	BB	AA	BB	AA	BB	BB	BB	BB	AA	AA	AA	AA	AA	BB	BB	BB	BB	AA	BB	AA	-	BB	BB	BB	BB	BB	BB	AA	BB	AA	AA	BB	AA	BB	BB
1_1553950	1	5.616991793	BB	AA	AA	BB	BB	BB	AA	AA	BB	AA	BB	AA	BB	AA	BB	AA	BB	BB	BB	BB	AA	AA	AA	AA	AA	BB	BB	BB	BB	AA	BB	AA	-	BB	BB	BB	BB	BB	BB	AA	BB	AA	AA	BB	AA	BB	BB
1_1554812	1	5.616991843	BB	AA	AA	BB	BB	BB	AA	AA	BB	AA	BB	AA	BB	AA	BB	AA	BB	BB	BB	BB	AA	AA	AA	AA	AA	BB	BB	BB	BB	AA	BB	AA	-	BB	BB	BB	BB	BB	BB	AA	BB	AA	AA	BB	AA	BB	BB
1_1557253	1	5.616991893	-	-	-	-	-	-	-	-	-	-	-	-	-	-	-	-	-	-	-	-	-	-	-	-	-	-	-	-	-	-	-	-	-	-	-	-	-	-	-	-	-	-	-	-	-	-	-
1_1573156	1	5.616991943	-	-	-	-	-	-	-	-	-	-	-	-	-	-	-	-	-	-	-	-	-	-	-	-	-	-	-	-	-	-	-	-	-	-	-	-	-	-	-	-	-	-	-	-	-	-	-
1_1598335	1	5.616991993	-	-	-	-	-	-	-	-	-	-	-	-	-	-	-	-	-	-	-	-	-	-	-	-	-	-	-	-	-	-	-	-	-	-	-	-	-	-	-	-	-	-	-	-	-	-	-
1_1633593	1	5.616992043	-	-	-	-	-	-	-	-	-	-	-	-	-	-	-	-	-	-	-	-	-	-	-	-	-	-	-	-	-	-	-	-	-	-	-	-	-	-	-	-	-	-	-	-	-	-	-
1_1644172	1	5.616992093	-	-	-	-	-	-	-	-	-	-	-	-	-	-	-	-	-	-	-	-	-	-	-	-	-	-	-	-	-	-	-	-	-	-	-	-	-	-	-	-	-	-	-	-	-	-	-
1_1661550	1	5.616992143	-	-	-	-	-	-	-	-	-	-	-	-	-	-	-	-	-	-	-	-	-	-	-	-	-	-	-	-	-	-	-	-	-	-	-	-	-	-	-	-	-	-	-	-	-	-	-
1_1666119	1	6.358118941	-	-	-	-	-	-	-	-	-	-	-	-	-	-	-	-	-	-	-	-	-	-	-	-	-	-	-	-	-	-	-	-	-	-	-	-	-	-	-	-	-	-	-	-	-	-	-
1_1686725	1	6.358118991	BB	AA	AA	BB	BB	BB	AA	AA	BB	AA	BB	AA	BB	AA	BB	AA	BB	BB	BB	BB	AA	AA	AA	AA	AA	BB	BB	BB	BB	AA	BB	AA	-	BB	BB	BB	BB	BB	BB	AA	BB	AA	AA	BB	AA	BB	BB
1_1706467	1	6.358119041	-	-	-	-	-	-	-	-	-	-	-	-	-	-	-	-	-	-	-	-	-	-	-	-	-	-	-	-	-	-	-	-	-	-	-	-	-	-	-	-	-	-	-	-	-	-	-
1_1727376	1	6.358119091	-	-	-	-	-	-	-	-	-	-	-	-	-	-	-	-	-	-	-	-	-	-	-	-	-	-	-	-	-	-	-	-	-	-	-	-	-	-	-	-	-	-	-	-	-	-	-
1_1741497	1	6.358119141	-	-	-	-	-	-	-	-	-	-	-	-	-	-	-	-	-	-	-	-	-	-	-	-	-	-	-	-	-	-	-	-	-	-	-	-	-	-	-	-	-	-	-	-	-	-	-
1_1759023	1	6.358119191	BB	AA	AA	BB	BB	BB	AA	AA	BB	AA	BB	AA	BB	AA	BB	AA	BB	BB	BB	BB	AA	AA	AA	AA	AA	BB	BB	BB	BB	AA	BB	AA	-	BB	BB	BB	BB	BB	BB	AA	BB	AA	AA	BB	AA	BB	BB
1_1800016	1	6.358119241	BB	AA	AA	BB	BB	BB	AA	AA	BB	AA	BB	AA	BB	AA	BB	AA	BB	BB	BB	BB	AA	AA	AA	AA	AA	BB	BB	BB	BB	AA	BB	AA	-	BB	BB	BB	BB	BB	BB	AA	BB	AA	AA	BB	AA	BB	BB
1_1818059	1	6.358119291	-	-	-	-	-	-	-	-	-	-	-	-	-	-	-	-	-	-	-	-	-	-	-	-	-	-	-	-	-	-	-	-	-	-	-	-	-	-	-	-	-	-	-	-	-	-	-
1_1823574	1	6.358119341	BB	AA	AA	BB	BB	BB	AA	AA	BB	AA	BB	AA	BB	AA	BB	AA	BB	BB	BB	BB	AA	AA	AA	AA	AA	BB	BB	BB	BB	AA	BB	AA	-	BB	BB	BB	BB	BB	BB	AA	BB	AA	AA	BB	AA	BB	BB
1_1850508	1	6.358119391	-	-	-	-	-	-	-	-	-	-	-	-	-	-	-	-	-	-	-	-	-	-	-	-	-	-	-	-	-	-	-	-	-	-	-	-	-	-	-	-	-	-	-	-	-	-	-
1_1868783	1	6.358119441	-	-	-	-	-	-	-	-	-	-	-	-	-	-	-	-	-	-	-	-	-	-	-	-	-	-	-	-	-	-	-	-	-	-	-	-	-	-	-	-	-	-	-	-	-	-	-
1_1878162	1	6.358119491	BB	AA	AA	BB	BB	BB	AA	AA	BB	AA	BB	AA	BB	AA	BB	AA	BB	BB	BB	BB	AA	AA	AA	AA	AA	BB	BB	BB	BB	AA	BB	AA	-	BB	BB	BB	BB	BB	BB	AA	BB	AA	AA	BB	AA	BB	BB
1_1884304	1	6.358119541	BB	AA	AA	BB	BB	BB	AA	AA	BB	AA	BB	AA	BB	AA	BB	AA	BB	BB	BB	BB	AA	AA	AA	AA	AA	BB	BB	BB	BB	AA	BB	AA	-	BB	BB	BB	BB	BB	BB	AA	BB	AA	AA	BB	AA	BB	BB
1_1886666	1	6.358119591	BB	AA	AA	BB	BB	BB	AA	AA	BB	AA	BB	AA	BB	AA	BB	AA	BB	BB	BB	BB	AA	AA	AA	AA	AA	BB	BB	BB	BB	AA	BB	AA	-	BB	BB	BB	BB	BB	BB	AA	BB	AA	AA	BB	AA	BB	BB
1_1891379	1	6.358119641	BB	AA	AA	BB	BB	BB	AA	AA	BB	AA	BB	AA	BB	AA	BB	AA	BB	BB	BB	BB	AA	AA	AA	AA	AA	BB	BB	BB	BB	AA	BB	AA	-	BB	BB	BB	BB	BB	BB	AA	BB	AA	AA	BB	AA	BB	BB
1_1897116	1	7.0442621	BB	AA	AA	BB	BB	BB	AA	AA	BB	AA	BB	AA	BB	AA	BB	AA	BB	BB	BB	BB	AA	AA	AA	AA	AA	BB	BB	BB	BB	AA	BB	AA	-	BB	BB	BB	BB	BB	BB	AA	BB	AA	AA	BB	AA	BB	BB
1_1940056	1	7.04426215	-	-	-	-	-	-	-	-	-	-	-	-	-	-	-	-	-	-	-	-	-	-	-	-	-	-	-	-	-	-	-	-	-	-	-	-	-	-	-	-	-	-	-	-	-	-	-
1_1940982	1	7.0442622	-	-	-	-	-	-	-	-	-	-	-	-	-	-	-	-	-	-	-	-	-	-	-	-	-	-	-	-	-	-	-	-	-	-	-	-	-	-	-	-	-	-	-	-	-	-	-
1_1941646	1	7.04426225	BB	AA	AA	BB	BB	BB	AA	AA	BB	AA	BB	AA	BB	AA	BB	AA	BB	BB	BB	BB	AA	AA	AA	AA	AA	BB	BB	BB	BB	AA	BB	AA	-	BB	BB	BB	BB	BB	BB	AA	BB	AA	AA	BB	AA	BB	BB
1_1953118	1	7.165695585	BB	AA	AA	BB	BB	BB	AA	AA	BB	AA	BB	AA	BB	AA	BB	AA	BB	BB	BB	BB	AA	AA	AA	AA	AA	BB	BB	BB	BB	AA	BB	AA	AA	BB	BB	BB	BB	BB	BB	AA	BB	AA	AA	BB	AA	BB	BB
1_1953254	1	7.165695635	BB	AA	AA	BB	BB	BB	AA	AA	BB	AA	BB	AA	BB	AA	BB	AA	BB	BB	BB	BB	AA	AA	AA	AA	AA	BB	BB	BB	BB	AA	BB	AA	AA	BB	BB	BB	BB	BB	BB	AA	BB	AA	AA	BB	AA	BB	BB
1_2003051	1	7.165695685	BB	AA	AA	BB	BB	BB	AA	AA	BB	AA	BB	AA	BB	AA	BB	AA	BB	BB	BB	BB	AA	AA	AA	AA	AA	BB	BB	BB	BB	AA	BB	AA	AA	BB	BB	BB	BB	BB	BB	AA	BB	AA	AA	BB	AA	BB	BB
1_2003516	1	7.165695735	BB	AA	AA	BB	BB	BB	AA	AA	BB	AA	BB	AA	BB	AA	BB	AA	BB	BB	BB	BB	AA	AA	AA	AA	AA	BB	BB	BB	BB	AA	BB	AA	AA	BB	BB	BB	BB	BB	BB	AA	BB	AA	AA	BB	AA	BB	BB
1_2024218	1	7.165695785	BB	AA	AA	BB	BB	BB	AA	AA	BB	AA	BB	AA	BB	AA	BB	AA	BB	BB	BB	BB	AA	AA	AA	AA	AA	BB	BB	BB	BB	AA	BB	AA	AA	BB	BB	BB	BB	BB	BB	AA	BB	AA	AA	BB	AA	BB	BB
1_2031287	1	7.165695835	-	-	-	-	-	-	-	-	-	-	-	-	-	-	-	-	-	-	-	-	-	-	-	-	-	-	-	-	-	-	-	-	-	-	-	-	-	-	-	-	-	-	-	-	-	-	-
1_2082303	1	7.165695885	BB	AA	AA	BB	BB	BB	AA	AA	BB	AA	BB	AA	BB	AA	BB	AA	BB	BB	BB	BB	AA	AA	AA	AA	AA	BB	BB	BB	BB	AA	BB	AA	AA	BB	BB	BB	BB	BB	BB	AA	BB	AA	AA	BB	AA	BB	BB
1_2092104	1	7.165695935	-	-	-	-	-	-	-	-	-	-	-	-	-	-	-	-	-	-	-	-	-	-	-	-	-	-	-	-	-	-	-	-	-	-	-	-	-	-	-	-	-	-	-	-	-	-	-
1_2128806	1	7.165695985	BB	AA	AA	BB	BB	BB	AA	AA	BB	AA	BB	AA	BB	AA	BB	AA	BB	BB	BB	BB	AA	AA	AA	AA	AA	BB	BB	BB	BB	AA	BB	AA	AA	BB	BB	BB	BB	BB	BB	AA	BB	AA	AA	BB	AA	BB	BB
1_2135037	1	7.165696035	BB	AA	AA	BB	BB	BB	AA	AA	BB	AA	BB	AA	BB	AA	BB	AA	BB	BB	BB	BB	AA	AA	AA	AA	AA	BB	BB	BB	BB	AA	BB	AA	AA	BB	BB	BB	BB	BB	BB	AA	BB	AA	AA	BB	AA	BB	BB
1_2149675	1	7.165696085	BB	AA	AA	BB	BB	BB	AA	AA	BB	AA	BB	AA	BB	AA	BB	AA	BB	BB	BB	BB	AA	AA	AA	AA	AA	BB	BB	BB	BB	AA	BB	AA	AA	BB	BB	BB	BB	BB	BB	AA	BB	AA	AA	BB	AA	BB	BB
1_2150069	1	7.165696135	-	-	-	-	-	-	-	-	-	-	-	-	-	-	-	-	-	-	-	-	-	-	-	-	-	-	-	-	-	-	-	-	-	-	-	-	-	-	-	-	-	-	-	-	-	-	-
1_2175444	1	7.165696185	BB	AA	AA	BB	BB	BB	AA	AA	BB	AA	BB	AA	BB	AA	BB	AA	BB	BB	BB	BB	AA	AA	AA	AA	AA	BB	BB	BB	BB	AA	BB	AA	AA	BB	BB	BB	BB	BB	BB	AA	BB	AA	AA	BB	AA	BB	BB
1_2176169	1	7.165696235	-	-	-	-	-	-	-	-	-	-	-	-	-	-	-	-	-	-	-	-	-	-	-	-	-	-	-	-	-	-	-	-	-	-	-	-	-	-	-	-	-	-	-	-	-	-	-
1_2176553	1	7.165696285	BB	AA	AA	BB	BB	BB	AA	AA	BB	AA	BB	AA	BB	AA	BB	AA	BB	BB	BB	BB	AA	AA	AA	AA	AA	BB	BB	BB	BB	AA	BB	AA	AA	BB	BB	BB	BB	BB	BB	AA	BB	AA	AA	BB	AA	BB	BB
1_2181118	1	7.165696335	BB	AA	AA	BB	BB	BB	AA	AA	BB	AA	BB	AA	BB	AA	BB	AA	BB	BB	BB	BB	AA	AA	AA	AA	AA	BB	BB	BB	BB	AA	BB	AA	AA	BB	BB	BB	BB	BB	BB	AA	BB	AA	AA	BB	AA	BB	BB
1_2190009	1	7.165696385	-	-	-	-	-	-	-	-	-	-	-	-	-	-	-	-	-	-	-	-	-	-	-	-	-	-	-	-	-	-	-	-	-	-	-	-	-	-	-	-	-	-	-	-	-	-	-
1_2193539	1	7.165696435	BB	AA	AA	BB	BB	BB	AA	AA	BB	AA	BB	AA	BB	AA	BB	AA	BB	BB	BB	BB	AA	AA	AA	AA	AA	BB	BB	BB	BB	AA	BB	AA	AA	BB	BB	BB	BB	BB	BB	AA	BB	AA	AA	BB	AA	BB	BB
1_2200123	1	7.165696485	BB	AA	AA	BB	BB	BB	AA	AA	BB	AA	BB	AA	BB	AA	BB	AA	BB	BB	BB	BB	AA	AA	AA	AA	AA	BB	BB	BB	BB	AA	BB	AA	AA	BB	BB	BB	BB	BB	BB	AA	BB	AA	AA	BB	AA	BB	BB
1_2201141	1	7.165696535	BB	AA	AA	BB	BB	BB	AA	AA	BB	AA	BB	AA	BB	AA	BB	AA	BB	BB	BB	BB	AA	AA	AA	AA	AA	BB	BB	BB	BB	AA	BB	AA	AA	BB	BB	BB	BB	BB	BB	AA	BB	AA	AA	BB	AA	BB	BB
1_2209436	1	7.165696585	-	-	-	-	-	-	-	-	-	-	-	-	-	-	-	-	-	-	-	-	-	-	-	-	-	-	-	-	-	-	-	-	-	-	-	-	-	-	-	-	-	-	-	-	-	-	-
1_2231205	1	7.829475028	-	-	-	-	-	-	-	-	-	-	-	-	-	-	-	-	-	-	-	-	-	-	-	-	-	-	-	-	-	-	-	-	-	-	-	-	-	-	-	-	-	-	-	-	-	-	-
1_2233052	1	7.829475078	BB	AA	AA	BB	BB	BB	AA	AA	BB	AA	BB	AA	BB	AA	BB	AA	BB	BB	BB	BB	AA	AA	AA	AA	AA	BB	BB	BB	BB	AA	BB	AA	AA	BB	BB	BB	BB	BB	BB	AA	BB	AA	AA	BB	AA	BB	BB
1_2259844	1	7.829475128	BB	AA	AA	BB	BB	BB	AA	AA	BB	AA	BB	AA	BB	AA	BB	AA	BB	BB	BB	BB	AA	AA	AA	AA	AA	BB	BB	BB	BB	AA	BB	AA	AA	BB	BB	BB	BB	BB	BB	AA	BB	AA	AA	BB	AA	BB	BB
1_2261412	1	7.829475178	BB	AA	AA	BB	BB	BB	AA	AA	BB	AA	BB	AA	BB	AA	BB	AA	BB	BB	BB	BB	AA	AA	AA	AA	AA	BB	BB	BB	BB	AA	BB	AA	AA	BB	BB	BB	BB	BB	BB	AA	BB	AA	AA	BB	AA	BB	BB
1_2262175	1	7.829475228	-	-	-	-	-	-	-	-	-	-	-	-	-	-	-	-	-	-	-	-	-	-	-	-	-	-	-	-	-	-	-	-	-	-	-	-	-	-	-	-	-	-	-	-	-	-	-
1_2278961	1	7.829475278	BB	AA	AA	BB	BB	BB	AA	AA	BB	AA	BB	AA	BB	AA	BB	AA	BB	BB	BB	BB	AA	AA	AA	AA	AA	BB	BB	BB	BB	AA	BB	AA	AA	BB	BB	BB	BB	BB	BB	AA	BB	AA	AA	BB	AA	BB	BB
1_2279907	1	7.829475328	-	-	-	-	-	-	-	-	-	-	-	-	-	-	-	-	-	-	-	-	-	-	-	-	-	-	-	-	-	-	-	-	-	-	-	-	-	-	-	-	-	-	-	-	-	-	-
1_2283733	1	7.829475378	-	-	-	-	-	-	-	-	-	-	-	-	-	-	-	-	-	-	-	-	-	-	-	-	-	-	-	-	-	-	-	-	-	-	-	-	-	-	-	-	-	-	-	-	-	-	-
1_2310510	1	8.008483952	-	-	-	-	-	-	-	-	-	-	-	-	-	-	-	-	-	-	-	-	-	-	-	-	-	-	-	-	-	-	-	-	-	-	-	-	-	-	-	-	-	-	-	-	-	-	-
1_2330198	1	8.008484002	BB	AA	AA	BB	BB	BB	AA	AA	BB	AA	BB	AA	BB	AA	BB	AA	BB	BB	BB	BB	AA	AA	AA	AA	AA	BB	BB	BB	BB	AA	BB	AA	AA	BB	BB	BB	BB	BB	BB	AA	BB	AA	AA	BB	AA	BB	BB
1_2332900	1	8.008484052	-	-	-	-	-	-	-	-	-	-	-	-	-	-	-	-	-	-	-	-	-	-	-	-	-	-	-	-	-	-	-	-	-	-	-	-	-	-	-	-	-	-	-	-	-	-	-
1_2335192	1	8.008484102	BB	AA	AA	BB	BB	BB	AA	AA	BB	AA	BB	AA	BB	AA	BB	AA	BB	BB	BB	BB	AA	AA	AA	AA	AA	BB	BB	BB	BB	AA	BB	AA	AA	BB	BB	BB	BB	BB	BB	AA	BB	AA	AA	BB	AA	BB	BB
1_2342270	1	8.008484152	BB	AA	AA	BB	BB	BB	AA	AA	BB	AA	BB	AA	BB	AA	BB	AA	BB	BB	BB	BB	AA	AA	AA	AA	AA	BB	BB	BB	BB	AA	BB	AA	AA	BB	BB	BB	BB	BB	BB	AA	BB	AA	AA	BB	AA	BB	BB
1_2343791	1	8.008484202	-	-	-	-	-	-	-	-	-	-	-	-	-	-	-	-	-	-	-	-	-	-	-	-	-	-	-	-	-	-	-	-	-	-	-	-	-	-	-	-	-	-	-	-	-	-	-
1_2346369	1	8.008484252	BB	AA	AA	BB	BB	BB	AA	AA	BB	AA	BB	AA	BB	AA	BB	AA	BB	BB	BB	BB	AA	AA	AA	AA	AA	BB	BB	BB	BB	AA	BB	AA	AA	BB	BB	BB	BB	BB	BB	AA	BB	AA	AA	BB	AA	BB	BB
1_2357413	1	8.008484302	BB	AA	AA	BB	BB	BB	AA	AA	BB	AA	BB	AA	BB	AA	BB	AA	BB	BB	BB	BB	AA	AA	AA	AA	AA	BB	BB	BB	BB	AA	BB	AA	AA	BB	BB	BB	BB	BB	BB	AA	BB	AA	AA	BB	AA	BB	BB
1_2359389	1	8.008484352	BB	AA	AA	BB	BB	BB	AA	AA	BB	AA	BB	AA	BB	AA	BB	AA	BB	BB	BB	BB	AA	AA	AA	AA	AA	BB	BB	BB	BB	AA	BB	AA	AA	BB	BB	BB	BB	BB	BB	AA	BB	AA	AA	BB	AA	BB	BB
1_2364700	1	8.008484402	BB	AA	AA	BB	BB	BB	AA	AA	BB	AA	BB	AA	BB	AA	BB	AA	BB	BB	BB	BB	AA	AA	AA	AA	AA	BB	BB	BB	BB	AA	BB	AA	AA	BB	BB	BB	BB	BB	BB	AA	BB	AA	AA	BB	AA	BB	BB
1_2366666	1	8.008484452	BB	AA	AA	BB	BB	BB	AA	AA	BB	AA	BB	AA	BB	AA	BB	AA	BB	BB	BB	BB	AA	AA	AA	AA	AA	BB	BB	BB	BB	AA	BB	AA	AA	BB	BB	BB	BB	BB	BB	AA	BB	AA	AA	BB	AA	BB	BB
1_2400473	1	8.008484502	-	-	-	-	-	-	-	-	-	-	-	-	-	-	-	-	-	-	-	-	-	-	-	-	-	-	-	-	-	-	-	-	-	-	-	-	-	-	-	-	-	-	-	-	-	-	-
1_2402957	1	8.008484552	-	-	-	-	-	-	-	-	-	-	-	-	-	-	-	-	-	-	-	-	-	-	-	-	-	-	-	-	-	-	-	-	-	-	-	-	-	-	-	-	-	-	-	-	-	-	-
1_2413101	1	8.175440084	BB	AA	AA	BB	BB	BB	AA	AA	BB	AA	BB	AA	BB	AA	BB	AA	BB	BB	BB	BB	AA	AA	AA	AA	AA	BB	BB	BB	BB	AA	BB	AA	AA	BB	BB	BB	BB	BB	BB	AA	BB	AA	AA	BB	AA	BB	BB
1_2420778	1	8.175440134	-	-	-	-	-	-	-	-	-	-	-	-	-	-	-	-	-	-	-	-	-	-	-	-	-	-	-	-	-	-	-	-	-	-	-	-	-	-	-	-	-	-	-	-	-	-	-
1_2422428	1	8.175440184	BB	AA	AA	BB	BB	BB	AA	AA	BB	AA	BB	AA	BB	AA	BB	AA	BB	BB	BB	BB	AA	AA	AA	AA	AA	BB	BB	BB	BB	AA	BB	AA	AA	BB	BB	BB	BB	BB	BB	AA	BB	AA	AA	BB	AA	BB	BB
1_2423348	1	8.175440234	BB	AA	AA	BB	BB	BB	AA	AA	BB	AA	BB	AA	BB	AA	BB	AA	BB	BB	BB	BB	AA	AA	AA	AA	AA	BB	BB	BB	BB	AA	BB	AA	AA	BB	BB	BB	BB	BB	BB	AA	BB	AA	AA	BB	AA	BB	BB
1_2428517	1	8.175440284	BB	AA	AA	BB	BB	BB	AA	AA	BB	AA	BB	AA	BB	AA	BB	AA	BB	BB	BB	BB	AA	AA	AA	AA	AA	BB	BB	BB	BB	AA	BB	AA	AA	BB	BB	BB	BB	BB	BB	AA	BB	AA	AA	BB	AA	BB	BB
1_2492677	1	8.175440334	BB	AA	AA	BB	BB	BB	AA	AA	BB	AA	BB	AA	BB	AA	BB	AA	BB	BB	BB	BB	AA	AA	AA	AA	AA	BB	BB	BB	BB	AA	BB	AA	AA	BB	BB	BB	BB	BB	BB	AA	BB	AA	AA	BB	AA	BB	BB
1_2503415	1	8.680087774	BB	AA	AA	BB	BB	BB	AA	AA	BB	AA	BB	AA	BB	AA	BB	AA	BB	BB	BB	BB	AA	AA	AA	AA	AA	BB	BB	BB	BB	AA	BB	AA	AA	BB	BB	BB	BB	BB	BB	AA	BB	AA	AA	BB	AA	BB	BB
1_2513630	1	8.680087824	BB	AA	AA	BB	BB	BB	AA	AA	BB	AA	BB	AA	BB	AA	BB	AA	BB	BB	BB	BB	AA	AA	AA	AA	AA	BB	BB	BB	BB	AA	BB	AA	AA	BB	BB	BB	BB	BB	BB	AA	BB	AA	AA	BB	AA	BB	BB
1_2513981	1	8.680087874	BB	AA	AA	BB	BB	BB	AA	AA	BB	AA	BB	AA	BB	AA	BB	AA	BB	BB	BB	BB	AA	AA	AA	AA	AA	BB	BB	BB	BB	AA	BB	AA	AA	BB	BB	BB	BB	BB	BB	AA	BB	AA	AA	BB	AA	BB	BB
1_2520128	1	8.680087924	BB	AA	AA	BB	BB	BB	AA	AA	BB	AA	BB	AA	BB	AA	BB	AA	BB	BB	BB	BB	AA	AA	AA	AA	AA	BB	BB	BB	BB	AA	BB	AA	AA	BB	BB	BB	BB	BB	BB	AA	BB	AA	AA	BB	AA	BB	BB
1_2547384	1	8.680087974	BB	AA	AA	BB	BB	BB	AA	AA	BB	AA	BB	AA	BB	AA	BB	AA	BB	BB	BB	BB	AA	AA	AA	AA	AA	BB	BB	BB	BB	AA	BB	AA	AA	BB	BB	BB	BB	BB	BB	AA	BB	AA	AA	BB	AA	BB	BB
1_2563458	1	8.680088024	BB	AA	AA	BB	BB	BB	AA	AA	BB	AA	BB	AA	BB	AA	BB	AA	BB	BB	BB	BB	AA	AA	AA	AA	AA	BB	BB	BB	BB	AA	BB	AA	AA	BB	BB	BB	BB	BB	BB	AA	BB	AA	AA	BB	AA	BB	BB
1_2571742	1	8.680088074	BB	AA	AA	BB	BB	BB	AA	AA	BB	AA	BB	AA	BB	AA	BB	AA	BB	BB	BB	BB	AA	AA	AA	AA	AA	BB	BB	BB	BB	AA	BB	AA	AA	BB	BB	BB	BB	BB	BB	AA	BB	AA	AA	BB	AA	BB	BB
1_2571913	1	8.680088124	BB	AA	AA	BB	BB	BB	AA	AA	BB	AA	BB	AA	BB	AA	BB	AA	BB	BB	BB	BB	AA	AA	AA	AA	AA	BB	BB	BB	BB	AA	BB	AA	AA	BB	BB	BB	BB	BB	BB	AA	BB	AA	AA	BB	AA	BB	BB
1_2574443	1	8.680088174	BB	AA	AA	BB	BB	BB	AA	AA	BB	AA	BB	AA	BB	AA	BB	AA	BB	BB	BB	BB	AA	AA	AA	AA	AA	BB	BB	BB	BB	AA	BB	AA	AA	BB	BB	BB	BB	BB	BB	AA	BB	AA	AA	BB	AA	BB	BB
1_2575032	1	8.680088224	BB	AA	AA	BB	BB	BB	AA	AA	BB	AA	BB	AA	BB	AA	BB	AA	BB	BB	BB	BB	AA	AA	AA	AA	AA	BB	BB	BB	BB	AA	BB	AA	AA	BB	BB	BB	BB	BB	BB	AA	BB	AA	AA	BB	AA	BB	BB
1_2575298	1	8.680088274	BB	AA	AA	BB	BB	BB	AA	AA	BB	AA	BB	AA	BB	AA	BB	AA	BB	BB	BB	BB	AA	AA	AA	AA	AA	BB	BB	BB	BB	AA	BB	AA	AA	BB	BB	BB	BB	BB	BB	AA	BB	AA	AA	BB	AA	BB	BB
1_2581699	1	8.680088324	BB	AA	AA	BB	BB	BB	AA	AA	BB	AA	BB	AA	BB	AA	BB	AA	BB	BB	BB	BB	AA	AA	AA	AA	AA	BB	BB	BB	BB	AA	BB	AA	AA	BB	BB	BB	BB	BB	BB	AA	BB	AA	AA	BB	AA	BB	BB
1_2584326	1	8.680088374	BB	AA	AA	BB	BB	BB	AA	AA	BB	AA	BB	AA	BB	AA	BB	AA	BB	BB	BB	BB	AA	AA	AA	AA	AA	BB	BB	BB	BB	AA	BB	AA	AA	BB	BB	BB	BB	BB	BB	AA	BB	AA	AA	BB	AA	BB	BB
1_2611044	1	8.680088424	-	-	-	-	-	-	-	-	-	-	-	-	-	-	-	-	-	-	-	-	-	-	-	-	-	-	-	-	-	-	-	-	-	-	-	-	-	-	-	-	-	-	-	-	-	-	-
1_2614938	1	8.680088474	BB	AA	AA	BB	BB	BB	AA	AA	BB	AA	BB	AA	BB	AA	BB	AA	BB	BB	BB	BB	AA	AA	AA	AA	AA	BB	BB	BB	BB	AA	BB	AA	AA	BB	BB	BB	BB	BB	BB	AA	BB	AA	AA	BB	AA	BB	BB
1_2629290	1	8.680088524	BB	AA	AA	BB	BB	BB	AA	AA	BB	AA	BB	AA	BB	AA	BB	AA	BB	BB	BB	BB	AA	AA	AA	AA	AA	BB	BB	BB	BB	AA	BB	AA	AA	BB	BB	BB	BB	BB	BB	AA	BB	AA	AA	BB	AA	BB	BB
1_2654106	1	8.680088574	BB	AA	AA	BB	BB	BB	AA	AA	BB	AA	BB	AA	BB	AA	BB	AA	BB	BB	BB	BB	AA	AA	AA	AA	AA	BB	BB	BB	BB	AA	BB	AA	AA	BB	BB	BB	BB	BB	BB	AA	BB	AA	AA	BB	AA	BB	BB
1_2657528	1	8.680088624	BB	AA	AA	BB	BB	BB	AA	AA	BB	AA	BB	AA	BB	AA	BB	AA	BB	BB	BB	BB	AA	AA	AA	AA	AA	BB	BB	BB	BB	AA	BB	AA	AA	BB	BB	BB	BB	BB	BB	AA	BB	AA	AA	BB	AA	BB	BB
1_2662258	1	8.680088674	BB	AA	AA	BB	BB	BB	AA	AA	BB	AA	BB	AA	BB	AA	BB	AA	BB	BB	BB	BB	AA	AA	AA	AA	AA	BB	BB	BB	BB	AA	BB	AA	AA	BB	BB	BB	BB	BB	BB	AA	BB	AA	AA	BB	AA	BB	BB
1_2664756	1	8.680088724	BB	AA	AA	BB	BB	BB	AA	AA	BB	AA	BB	AA	BB	AA	BB	AA	BB	BB	BB	BB	AA	AA	AA	AA	AA	BB	BB	BB	BB	AA	BB	AA	AA	BB	BB	BB	BB	BB	BB	AA	BB	AA	AA	BB	AA	BB	BB
1_2665466	1	8.680088774	BB	AA	AA	BB	BB	BB	AA	AA	BB	AA	BB	AA	BB	AA	BB	AA	BB	BB	BB	BB	AA	AA	AA	AA	AA	BB	BB	BB	BB	AA	BB	AA	AA	BB	BB	BB	BB	BB	BB	AA	BB	AA	AA	BB	AA	BB	BB
1_2669715	1	8.680088824	BB	AA	AA	BB	BB	BB	AA	AA	BB	AA	BB	AA	BB	AA	BB	AA	BB	BB	BB	BB	AA	AA	AA	AA	AA	BB	BB	BB	BB	AA	BB	AA	AA	BB	BB	BB	BB	BB	BB	AA	BB	AA	AA	BB	AA	BB	BB
1_2671066	1	8.680088874	BB	AA	AA	BB	BB	BB	AA	AA	BB	AA	BB	AA	BB	AA	BB	AA	BB	BB	BB	BB	AA	AA	AA	AA	AA	BB	BB	BB	BB	AA	BB	AA	AA	BB	BB	BB	BB	BB	BB	AA	BB	AA	AA	BB	AA	BB	BB
1_2672729	1	8.680088924	BB	AA	AA	BB	BB	BB	AA	AA	BB	AA	BB	AA	BB	AA	BB	AA	BB	BB	BB	BB	AA	AA	AA	AA	AA	BB	BB	BB	BB	AA	BB	AA	AA	BB	BB	BB	BB	BB	BB	AA	BB	AA	AA	BB	AA	BB	BB
1_2684066	1	8.680088974	BB	AA	AA	BB	BB	BB	AA	AA	BB	AA	BB	AA	BB	AA	BB	AA	BB	BB	BB	BB	AA	AA	AA	AA	AA	BB	BB	BB	BB	AA	BB	AA	AA	BB	BB	BB	BB	BB	BB	AA	BB	AA	AA	BB	AA	BB	BB
1_2689107	1	8.680089024	BB	AA	AA	BB	BB	BB	AA	AA	BB	AA	BB	AA	BB	AA	BB	AA	BB	BB	BB	BB	AA	AA	AA	AA	AA	BB	BB	BB	BB	AA	BB	AA	AA	BB	BB	BB	BB	BB	BB	AA	BB	AA	AA	BB	AA	BB	BB
1_2703869	1	9.159554735	BB	AA	AA	BB	BB	BB	AA	AA	BB	AA	BB	AA	BB	AA	BB	AA	BB	BB	BB	BB	AA	AA	AA	AA	AA	BB	BB	BB	BB	AA	BB	AA	AA	BB	BB	BB	BB	BB	BB	AA	-	AA	AA	BB	AA	BB	BB
1_2707773	1	9.159554785	BB	AA	AA	BB	BB	BB	AA	AA	BB	AA	BB	AA	BB	AA	BB	AA	BB	BB	BB	BB	AA	AA	AA	AA	AA	BB	BB	BB	BB	AA	BB	AA	AA	BB	BB	BB	BB	BB	BB	AA	-	AA	AA	BB	AA	BB	BB
1_2712443	1	9.159554835	BB	AA	AA	BB	BB	BB	AA	AA	BB	AA	BB	AA	BB	AA	BB	AA	BB	BB	BB	BB	AA	AA	AA	AA	AA	BB	BB	BB	BB	AA	BB	AA	AA	BB	BB	BB	BB	BB	BB	AA	-	AA	AA	BB	AA	BB	BB
1_2723135	1	9.159554885	BB	AA	AA	BB	BB	BB	AA	AA	BB	AA	BB	AA	BB	AA	BB	AA	BB	BB	BB	BB	AA	AA	AA	AA	AA	BB	BB	BB	BB	AA	BB	AA	AA	BB	BB	BB	BB	BB	BB	AA	-	AA	AA	BB	AA	BB	BB
1_2752548	1	9.159554935	BB	AA	AA	BB	BB	BB	AA	AA	BB	AA	BB	AA	BB	AA	BB	AA	BB	BB	BB	BB	AA	AA	AA	AA	AA	BB	BB	BB	BB	AA	BB	AA	AA	BB	BB	BB	BB	BB	BB	AA	-	AA	AA	BB	AA	BB	BB
1_2760302	1	9.159554985	BB	AA	AA	BB	BB	BB	AA	AA	BB	AA	BB	AA	BB	AA	BB	AA	BB	BB	BB	BB	AA	AA	AA	AA	AA	BB	BB	BB	BB	AA	BB	AA	AA	BB	BB	BB	BB	BB	BB	AA	-	AA	AA	BB	AA	BB	BB
1_2815002	1	9.159555035	BB	AA	AA	BB	BB	BB	AA	AA	BB	AA	BB	AA	BB	AA	BB	AA	BB	BB	BB	BB	AA	AA	AA	AA	AA	BB	BB	BB	BB	AA	BB	AA	AA	BB	BB	BB	BB	BB	BB	AA	-	AA	AA	BB	AA	BB	BB
1_2817741	1	9.159555085	BB	AA	AA	BB	BB	BB	AA	AA	BB	AA	BB	AA	BB	AA	BB	AA	BB	BB	BB	BB	AA	AA	AA	AA	AA	BB	BB	BB	BB	AA	BB	AA	AA	BB	BB	BB	BB	BB	BB	AA	-	AA	AA	BB	AA	BB	BB
1_2819549	1	9.159555135	BB	AA	AA	BB	BB	BB	AA	AA	BB	AA	BB	AA	BB	AA	BB	AA	BB	BB	BB	BB	AA	AA	AA	AA	AA	BB	BB	BB	BB	AA	BB	AA	AA	BB	BB	BB	BB	BB	BB	AA	-	AA	AA	BB	AA	BB	BB
1_2870837	1	9.159555185	BB	AA	AA	BB	BB	BB	AA	AA	BB	AA	BB	AA	BB	AA	BB	AA	BB	BB	BB	BB	AA	AA	AA	AA	AA	BB	BB	BB	BB	AA	BB	AA	AA	BB	BB	BB	BB	BB	BB	AA	-	AA	AA	BB	AA	BB	BB
1_2942666	1	9.159555235	BB	AA	AA	BB	BB	BB	AA	AA	BB	AA	BB	AA	BB	AA	BB	AA	BB	BB	BB	BB	AA	AA	AA	AA	AA	BB	BB	BB	BB	AA	BB	AA	AA	BB	BB	BB	BB	BB	BB	AA	-	AA	AA	BB	AA	BB	BB
1_2961396	1	9.159555285	-	-	-	-	-	-	-	-	-	-	-	-	-	-	-	-	-	-	-	-	-	-	-	-	-	-	-	-	-	-	-	-	-	-	-	-	-	-	-	-	-	-	-	-	-	-	-
1_2961664	1	9.159555335	BB	AA	AA	BB	BB	BB	AA	AA	BB	AA	BB	AA	BB	AA	BB	AA	BB	BB	BB	BB	AA	AA	AA	AA	AA	BB	BB	BB	BB	AA	BB	AA	AA	BB	BB	BB	BB	BB	BB	AA	-	AA	AA	BB	AA	BB	BB
1_2987050	1	9.159555385	BB	AA	AA	BB	BB	BB	AA	AA	BB	AA	BB	AA	BB	AA	BB	AA	BB	BB	BB	BB	AA	AA	AA	AA	AA	BB	BB	BB	BB	AA	BB	AA	AA	BB	BB	BB	BB	BB	BB	AA	-	AA	AA	BB	AA	BB	BB
1_2991814	1	9.159555435	BB	AA	AA	BB	BB	BB	AA	AA	BB	AA	BB	AA	BB	AA	BB	AA	BB	BB	BB	BB	AA	AA	AA	AA	AA	BB	BB	BB	BB	AA	BB	AA	AA	BB	BB	BB	BB	BB	BB	AA	-	AA	AA	BB	AA	BB	BB
1_3010813	1	10.0289653	BB	AA	AA	BB	BB	BB	AA	AA	BB	AA	BB	AA	BB	AA	BB	AA	BB	BB	BB	BB	AA	AA	AA	AA	AA	BB	BB	BB	BB	AA	BB	AA	AA	BB	BB	BB	BB	BB	BB	AA	-	AA	AA	BB	AA	BB	BB
1_3043883	1	10.02896535	BB	AA	AA	BB	BB	BB	AA	AA	BB	AA	BB	AA	BB	AA	BB	AA	BB	BB	BB	BB	AA	AA	AA	AA	AA	BB	BB	BB	BB	AA	BB	AA	AA	BB	BB	BB	BB	BB	BB	AA	-	AA	AA	BB	AA	BB	BB
1_3049198	1	10.0289654	BB	AA	AA	BB	BB	BB	AA	AA	BB	AA	BB	AA	BB	AA	BB	AA	BB	BB	BB	BB	AA	AA	AA	AA	AA	BB	BB	BB	BB	AA	BB	AA	AA	BB	BB	BB	BB	BB	BB	AA	-	AA	AA	BB	AA	BB	BB
1_3082705	1	10.02896545	BB	AA	AA	BB	BB	BB	AA	AA	BB	AA	BB	AA	BB	AA	BB	AA	BB	BB	BB	BB	AA	AA	AA	AA	AA	BB	BB	BB	BB	AA	BB	AA	AA	BB	BB	BB	BB	BB	BB	AA	-	AA	AA	BB	AA	BB	BB
1_3088870	1	10.0289655	BB	AA	AA	BB	BB	BB	AA	AA	BB	AA	BB	AA	BB	AA	BB	AA	BB	BB	BB	BB	AA	AA	AA	AA	AA	BB	BB	BB	BB	AA	BB	AA	AA	BB	BB	BB	BB	BB	BB	AA	-	AA	AA	BB	AA	BB	BB
1_3093421	1	10.02896555	-	-	-	-	-	-	-	-	-	-	-	-	-	-	-	-	-	-	-	-	-	-	-	-	-	-	-	-	-	-	-	-	-	-	-	-	-	-	-	-	-	-	-	-	-	-	-
1_3098803	1	10.0289656	BB	AA	AA	BB	BB	BB	AA	AA	BB	AA	BB	AA	BB	AA	BB	AA	BB	BB	BB	BB	AA	AA	AA	AA	AA	BB	BB	BB	BB	AA	BB	AA	AA	BB	BB	BB	BB	BB	BB	AA	-	AA	AA	BB	AA	BB	BB
1_3102662	1	10.02896565	BB	AA	AA	BB	BB	BB	AA	AA	BB	AA	BB	AA	BB	AA	BB	AA	BB	BB	BB	BB	AA	AA	AA	AA	AA	BB	BB	BB	BB	AA	BB	AA	AA	BB	BB	BB	BB	BB	BB	AA	-	AA	AA	BB	AA	BB	BB
1_3123540	1	10.0789911	BB	AA	AA	BB	BB	BB	AA	AA	BB	AA	BB	AA	BB	AA	BB	AA	BB	BB	BB	BB	AA	AA	AA	AA	AA	BB	BB	BB	BB	AA	BB	AA	AA	BB	BB	BB	BB	BB	BB	AA	-	AA	AA	BB	AA	BB	BB
1_3142868	1	10.07899115	BB	AA	AA	BB	BB	BB	AA	AA	BB	AA	BB	AA	BB	AA	BB	AA	BB	BB	BB	BB	AA	AA	AA	AA	AA	BB	BB	BB	BB	AA	BB	AA	AA	BB	BB	BB	BB	BB	BB	AA	-	AA	AA	BB	AA	BB	BB
1_3160181	1	10.0789912	-	-	-	-	-	-	-	-	-	-	-	-	-	-	-	-	-	-	-	-	-	-	-	-	-	-	-	-	-	-	-	-	-	-	-	-	-	-	-	-	-	-	-	-	-	-	-
1_3170773	1	10.07899125	-	-	-	-	-	-	-	-	-	-	-	-	-	-	-	-	-	-	-	-	-	-	-	-	-	-	-	-	-	-	-	-	-	-	-	-	-	-	-	-	-	-	-	-	-	-	-
1_3174213	1	10.0789913	BB	AA	AA	BB	BB	BB	AA	AA	BB	AA	BB	AA	BB	AA	BB	AA	BB	BB	BB	BB	AA	AA	AA	AA	AA	BB	BB	BB	BB	AA	BB	AA	AA	BB	BB	BB	BB	BB	BB	AA	-	AA	AA	BB	AA	BB	BB
1_3177931	1	10.07899135	-	-	-	-	-	-	-	-	-	-	-	-	-	-	-	-	-	-	-	-	-	-	-	-	-	-	-	-	-	-	-	-	-	-	-	-	-	-	-	-	-	-	-	-	-	-	-
1_3180305	1	10.0789914	-	-	-	-	-	-	-	-	-	-	-	-	-	-	-	-	-	-	-	-	-	-	-	-	-	-	-	-	-	-	-	-	-	-	-	-	-	-	-	-	-	-	-	-	-	-	-
1_3193429	1	10.07899145	BB	AA	AA	BB	BB	BB	AA	AA	BB	AA	BB	AA	BB	AA	BB	AA	BB	BB	BB	BB	AA	AA	AA	AA	AA	BB	BB	BB	BB	AA	BB	AA	AA	BB	BB	BB	BB	BB	BB	AA	-	AA	AA	BB	AA	BB	BB
1_3195972	1	10.0789915	BB	AA	AA	BB	BB	BB	AA	AA	BB	AA	BB	AA	BB	AA	BB	AA	BB	BB	BB	BB	AA	AA	AA	AA	AA	BB	BB	BB	BB	AA	BB	AA	AA	BB	BB	BB	BB	BB	BB	AA	-	AA	AA	BB	AA	BB	BB
1_3209420	1	10.07899155	-	-	-	-	-	-	-	-	-	-	-	-	-	-	-	-	-	-	-	-	-	-	-	-	-	-	-	-	-	-	-	-	-	-	-	-	-	-	-	-	-	-	-	-	-	-	-
1_3214906	1	10.0789916	BB	AA	AA	BB	BB	BB	AA	AA	BB	AA	BB	AA	BB	AA	BB	AA	BB	BB	BB	BB	AA	AA	AA	AA	AA	BB	BB	BB	BB	AA	BB	AA	AA	BB	BB	BB	BB	BB	BB	AA	-	AA	AA	BB	AA	BB	BB
1_3221065	1	10.23242712	BB	AA	AA	BB	BB	BB	AA	AA	BB	AA	BB	AA	BB	AA	BB	AA	BB	BB	BB	BB	AA	AA	AA	AA	AA	BB	BB	BB	BB	AA	BB	AA	AA	BB	BB	BB	BB	BB	BB	AA	-	AA	AA	BB	AA	BB	BB
1_3276025	1	10.23242717	BB	AA	AA	BB	BB	BB	AA	AA	BB	AA	BB	AA	BB	AA	BB	AA	BB	BB	BB	BB	AA	AA	AA	AA	AA	BB	BB	BB	BB	AA	BB	AA	AA	BB	BB	BB	BB	BB	BB	AA	-	AA	AA	BB	AA	BB	BB
1_3283264	1	10.23242722	BB	AA	AA	BB	BB	BB	AA	AA	BB	AA	BB	AA	BB	AA	BB	AA	BB	BB	BB	BB	AA	AA	AA	AA	AA	BB	BB	BB	BB	AA	BB	AA	AA	BB	BB	BB	BB	BB	BB	AA	-	AA	AA	BB	AA	BB	BB
1_3283372	1	10.23242727	BB	AA	AA	BB	BB	BB	AA	AA	BB	AA	BB	AA	BB	AA	BB	AA	BB	BB	BB	BB	AA	AA	AA	AA	AA	BB	BB	BB	BB	AA	BB	AA	AA	BB	BB	BB	BB	BB	BB	AA	-	AA	AA	BB	AA	BB	BB
1_3284417	1	10.23242732	BB	AA	AA	BB	BB	BB	AA	AA	BB	AA	BB	AA	BB	AA	BB	AA	BB	BB	BB	BB	AA	AA	AA	AA	AA	BB	BB	BB	BB	AA	BB	AA	AA	BB	BB	BB	BB	BB	BB	AA	-	AA	AA	BB	AA	BB	BB
1_3294935	1	10.23242737	-	-	-	-	-	-	-	-	-	-	-	-	-	-	-	-	-	-	-	-	-	-	-	-	-	-	-	-	-	-	-	-	-	-	-	-	-	-	-	-	-	-	-	-	-	-	-
1_3301187	1	10.23242742	BB	AA	AA	BB	BB	BB	AA	AA	BB	AA	BB	AA	BB	AA	BB	AA	BB	BB	BB	BB	AA	AA	AA	AA	AA	BB	BB	BB	BB	AA	BB	AA	AA	BB	BB	BB	BB	BB	BB	AA	-	AA	AA	BB	AA	BB	BB
1_3303190	1	10.23242747	-	-	-	-	-	-	-	-	-	-	-	-	-	-	-	-	-	-	-	-	-	-	-	-	-	-	-	-	-	-	-	-	-	-	-	-	-	-	-	-	-	-	-	-	-	-	-
1_3328946	1	10.23242752	BB	AA	AA	BB	BB	BB	AA	AA	BB	AA	BB	AA	BB	AA	BB	AA	BB	BB	BB	BB	AA	AA	AA	AA	AA	BB	BB	BB	BB	AA	BB	AA	AA	BB	BB	BB	BB	BB	BB	AA	-	AA	AA	BB	AA	BB	BB
1_3331791	1	10.23242757	-	-	-	-	-	-	-	-	-	-	-	-	-	-	-	-	-	-	-	-	-	-	-	-	-	-	-	-	-	-	-	-	-	-	-	-	-	-	-	-	-	-	-	-	-	-	-
1_3332918	1	10.23242762	BB	AA	AA	BB	BB	BB	AA	AA	BB	AA	BB	AA	BB	AA	BB	AA	BB	BB	BB	BB	AA	AA	AA	AA	AA	BB	BB	BB	BB	AA	BB	AA	AA	BB	BB	BB	BB	BB	BB	AA	-	AA	AA	BB	AA	BB	BB
1_3332984	1	10.23242767	BB	AA	AA	BB	BB	BB	AA	AA	BB	AA	BB	AA	BB	AA	BB	AA	BB	BB	BB	BB	AA	AA	AA	AA	AA	BB	BB	BB	BB	AA	BB	AA	AA	BB	BB	BB	BB	BB	BB	AA	-	AA	AA	BB	AA	BB	BB
1_3337429	1	10.23242772	BB	AA	AA	BB	BB	BB	AA	AA	BB	AA	BB	AA	BB	AA	BB	AA	BB	BB	BB	BB	AA	AA	AA	AA	AA	BB	BB	BB	BB	AA	BB	AA	AA	BB	BB	BB	BB	BB	BB	AA	-	AA	AA	BB	AA	BB	BB
1_3347119	1	10.23242777	BB	AA	AA	BB	BB	BB	AA	AA	BB	AA	BB	AA	BB	AA	BB	AA	BB	BB	BB	BB	AA	AA	AA	AA	AA	BB	BB	BB	BB	AA	BB	AA	AA	BB	BB	BB	BB	BB	BB	AA	-	AA	AA	BB	AA	BB	BB
1_3370172	1	10.23242782	BB	AA	AA	BB	BB	BB	AA	AA	BB	AA	BB	AA	BB	AA	BB	AA	BB	BB	BB	BB	AA	AA	AA	AA	AA	BB	BB	BB	BB	AA	BB	AA	AA	BB	BB	BB	BB	BB	BB	AA	-	AA	AA	BB	AA	BB	BB
1_3374264	1	10.23242787	BB	AA	AA	BB	BB	BB	AA	AA	BB	AA	BB	AA	BB	AA	BB	AA	BB	BB	BB	BB	AA	AA	AA	AA	AA	BB	BB	BB	BB	AA	BB	AA	AA	BB	BB	BB	BB	BB	BB	AA	-	AA	AA	BB	AA	BB	BB
1_3379543	1	10.69992545	BB	AA	AA	BB	BB	BB	AA	AA	BB	AA	BB	AA	BB	AA	BB	AA	BB	BB	BB	BB	AA	AA	AA	AA	AA	BB	BB	BB	BB	AA	BB	AA	AA	BB	BB	BB	BB	BB	BB	AA	BB	AA	AA	BB	AA	BB	BB
1_3396278	1	10.6999255	BB	AA	AA	BB	BB	BB	AA	AA	BB	AA	BB	AA	BB	AA	BB	AA	BB	BB	BB	BB	AA	AA	AA	AA	AA	BB	BB	BB	BB	AA	BB	AA	AA	BB	BB	BB	BB	BB	BB	AA	BB	AA	AA	BB	AA	BB	BB
1_3398442	1	10.69992555	BB	AA	AA	BB	BB	BB	AA	AA	BB	AA	BB	AA	BB	AA	BB	AA	BB	BB	BB	BB	AA	AA	AA	AA	AA	BB	BB	BB	BB	AA	BB	AA	AA	BB	BB	BB	BB	BB	BB	AA	BB	AA	AA	BB	AA	BB	BB
1_3420201	1	10.6999256	BB	AA	AA	BB	BB	BB	AA	AA	BB	AA	BB	AA	BB	AA	BB	AA	BB	BB	BB	BB	AA	AA	AA	AA	AA	BB	BB	BB	BB	AA	BB	AA	AA	BB	BB	BB	BB	BB	BB	AA	BB	AA	AA	BB	AA	BB	BB
1_3421106	1	10.69992565	-	-	-	-	-	-	-	-	-	-	-	-	-	-	-	-	-	-	-	-	-	-	-	-	-	-	-	-	-	-	-	-	-	-	-	-	-	-	-	-	-	-	-	-	-	-	-
1_3424447	1	10.6999257	BB	AA	AA	BB	BB	BB	AA	AA	BB	AA	BB	AA	BB	AA	BB	AA	BB	BB	BB	BB	AA	AA	AA	AA	AA	BB	BB	BB	BB	AA	BB	AA	AA	BB	BB	BB	BB	BB	BB	AA	BB	AA	AA	BB	AA	BB	BB
1_3428947	1	10.69992575	-	-	-	-	-	-	-	-	-	-	-	-	-	-	-	-	-	-	-	-	-	-	-	-	-	-	-	-	-	-	-	-	-	-	-	-	-	-	-	-	-	-	-	-	-	-	-
1_3429914	1	10.6999258	BB	AA	AA	BB	BB	BB	AA	AA	BB	AA	BB	AA	BB	AA	BB	AA	BB	BB	BB	BB	AA	AA	AA	AA	AA	BB	BB	BB	BB	AA	BB	AA	AA	BB	BB	BB	BB	BB	BB	AA	BB	AA	AA	BB	AA	BB	BB
1_3433361	1	10.69992585	-	-	-	-	-	-	-	-	-	-	-	-	-	-	-	-	-	-	-	-	-	-	-	-	-	-	-	-	-	-	-	-	-	-	-	-	-	-	-	-	-	-	-	-	-	-	-
1_3437225	1	10.6999259	BB	AA	AA	BB	BB	BB	AA	AA	BB	AA	BB	AA	BB	AA	BB	AA	BB	BB	BB	BB	-	AA	AA	AA	AA	BB	BB	BB	BB	AA	BB	AA	AA	BB	BB	BB	BB	BB	BB	AA	BB	AA	AA	BB	AA	BB	BB
1_3459900	1	10.69992595	BB	AA	AA	BB	BB	BB	AA	AA	BB	AA	BB	AA	BB	AA	BB	AA	BB	BB	BB	BB	-	AA	AA	AA	AA	BB	BB	BB	BB	AA	BB	AA	AA	BB	BB	BB	BB	BB	BB	AA	BB	AA	AA	BB	AA	BB	BB
1_3464131	1	10.699926	BB	AA	AA	BB	BB	BB	AA	AA	BB	AA	BB	AA	BB	AA	BB	AA	BB	BB	BB	BB	-	AA	AA	AA	AA	BB	BB	BB	BB	AA	BB	AA	AA	BB	BB	BB	BB	BB	BB	AA	BB	AA	AA	BB	AA	BB	BB
1_3473536	1	10.69992605	BB	AA	AA	BB	BB	BB	AA	AA	BB	AA	BB	AA	BB	AA	BB	AA	BB	BB	BB	BB	-	AA	AA	AA	AA	BB	BB	BB	BB	AA	BB	AA	AA	BB	BB	BB	BB	BB	BB	AA	BB	AA	AA	BB	AA	BB	BB
1_3474673	1	10.6999261	BB	AA	AA	BB	BB	BB	AA	AA	BB	AA	BB	AA	BB	AA	BB	AA	BB	BB	BB	BB	-	AA	AA	AA	AA	BB	BB	BB	BB	AA	BB	AA	AA	BB	BB	BB	BB	BB	BB	AA	BB	AA	AA	BB	AA	BB	BB
1_3474988	1	10.69992615	BB	AA	AA	BB	BB	BB	AA	AA	BB	AA	BB	AA	BB	AA	BB	AA	BB	BB	BB	BB	-	AA	AA	AA	AA	BB	BB	BB	BB	AA	BB	AA	AA	BB	BB	BB	BB	BB	BB	AA	BB	AA	AA	BB	AA	BB	BB
1_3480913	1	10.6999262	BB	AA	AA	BB	BB	BB	AA	AA	BB	AA	BB	AA	BB	AA	BB	AA	BB	BB	BB	BB	-	AA	AA	AA	AA	BB	BB	BB	BB	AA	BB	AA	AA	BB	BB	BB	BB	BB	BB	AA	BB	AA	AA	BB	AA	BB	BB
1_3489701	1	10.69992625	BB	AA	AA	BB	BB	BB	AA	AA	BB	AA	BB	AA	BB	AA	BB	AA	BB	BB	BB	BB	-	AA	AA	AA	AA	BB	BB	BB	BB	AA	BB	AA	AA	BB	BB	BB	BB	BB	BB	AA	BB	AA	AA	BB	AA	BB	BB
1_3546529	1	10.6999263	BB	AA	AA	BB	BB	BB	AA	AA	BB	AA	BB	AA	BB	AA	BB	AA	BB	BB	BB	BB	-	AA	AA	AA	AA	BB	BB	BB	BB	AA	BB	AA	AA	BB	BB	BB	BB	BB	BB	AA	BB	AA	AA	BB	AA	BB	BB
1_3546637	1	10.69992635	BB	AA	AA	BB	BB	BB	AA	AA	BB	AA	BB	AA	BB	AA	BB	AA	BB	BB	BB	BB	-	AA	AA	AA	AA	BB	BB	BB	BB	AA	BB	AA	AA	BB	BB	BB	BB	BB	BB	AA	BB	AA	AA	BB	AA	BB	BB
1_3554298	1	10.6999264	BB	AA	AA	BB	BB	BB	AA	AA	BB	AA	BB	AA	BB	AA	BB	AA	BB	BB	BB	BB	-	AA	AA	AA	AA	BB	BB	BB	BB	AA	BB	AA	AA	BB	BB	BB	BB	BB	BB	AA	BB	AA	AA	BB	AA	BB	BB
1_3558018	1	11.76151752	BB	AA	AA	BB	BB	BB	AA	AA	BB	AA	BB	AA	BB	AA	BB	AA	BB	BB	BB	BB	-	AA	AA	AA	AA	BB	BB	BB	BB	AA	BB	AA	AA	BB	BB	BB	BB	BB	BB	AA	BB	AA	AA	BB	AA	BB	BB
1_3565345	1	11.76151757	BB	AA	AA	BB	BB	BB	AA	AA	BB	AA	BB	AA	BB	AA	BB	AA	BB	BB	BB	BB	-	AA	AA	AA	AA	BB	BB	BB	BB	AA	BB	AA	AA	BB	BB	BB	BB	BB	BB	AA	BB	AA	AA	BB	AA	BB	BB
1_3566053	1	11.76151762	BB	AA	AA	BB	BB	BB	AA	AA	BB	AA	BB	AA	BB	AA	BB	AA	BB	BB	BB	BB	-	AA	AA	AA	AA	BB	BB	BB	BB	AA	BB	AA	AA	BB	BB	BB	BB	BB	BB	AA	BB	AA	AA	BB	AA	BB	BB
1_3568596	1	11.76151767	BB	AA	AA	BB	BB	BB	AA	AA	BB	AA	BB	AA	BB	AA	BB	AA	BB	BB	BB	BB	-	AA	AA	AA	AA	BB	BB	BB	BB	AA	BB	AA	AA	BB	BB	BB	BB	BB	BB	AA	BB	AA	AA	BB	AA	BB	BB
1_3576440	1	11.76151772	-	-	-	-	-	-	-	-	-	-	-	-	-	-	-	-	-	-	-	-	-	-	-	-	-	-	-	-	-	-	-	-	-	-	-	-	-	-	-	-	-	-	-	-	-	-	-
1_3577528	1	11.76151777	-	-	-	-	-	-	-	-	-	-	-	-	-	-	-	-	-	-	-	-	-	-	-	-	-	-	-	-	-	-	-	-	-	-	-	-	-	-	-	-	-	-	-	-	-	-	-
1_3577679	1	11.76151782	-	-	-	-	-	-	-	-	-	-	-	-	-	-	-	-	-	-	-	-	-	-	-	-	-	-	-	-	-	-	-	-	-	-	-	-	-	-	-	-	-	-	-	-	-	-	-
1_3580646	1	11.76151787	BB	AA	AA	BB	BB	BB	AA	AA	BB	AA	BB	AA	BB	AA	BB	AA	BB	BB	BB	BB	-	AA	AA	AA	AA	BB	BB	BB	BB	AA	BB	AA	AA	BB	BB	BB	BB	BB	BB	AA	BB	AA	AA	BB	AA	BB	BB
1_3585703	1	11.76151792	-	-	-	-	-	-	-	-	-	-	-	-	-	-	-	-	-	-	-	-	-	-	-	-	-	-	-	-	-	-	-	-	-	-	-	-	-	-	-	-	-	-	-	-	-	-	-
1_3627054	1	11.76151797	BB	AA	AA	BB	BB	BB	AA	AA	BB	AA	BB	AA	BB	AA	BB	AA	BB	BB	BB	BB	-	AA	AA	AA	AA	BB	BB	BB	BB	AA	BB	AA	AA	BB	BB	BB	BB	BB	BB	AA	BB	AA	AA	BB	AA	BB	BB
1_3665767	1	11.76151802	BB	AA	AA	BB	BB	BB	AA	AA	BB	AA	BB	AA	BB	AA	BB	AA	BB	BB	BB	BB	-	AA	AA	AA	AA	BB	BB	BB	BB	AA	BB	AA	AA	BB	BB	BB	BB	BB	BB	AA	BB	AA	AA	BB	AA	BB	BB
1_3680796	1	11.76151807	BB	AA	AA	BB	BB	BB	AA	AA	BB	AA	BB	AA	BB	AA	BB	AA	BB	BB	BB	BB	-	AA	AA	AA	AA	BB	BB	BB	BB	AA	BB	AA	AA	BB	BB	BB	BB	BB	BB	AA	BB	AA	AA	BB	AA	BB	BB
1_3682404	1	11.76151812	BB	AA	AA	BB	BB	BB	AA	AA	BB	AA	BB	AA	BB	AA	BB	AA	BB	BB	BB	BB	-	AA	AA	AA	AA	BB	BB	BB	BB	AA	BB	AA	AA	BB	BB	BB	BB	BB	BB	AA	BB	AA	AA	BB	AA	BB	BB
1_3688706	1	11.76151817	-	-	-	-	-	-	-	-	-	-	-	-	-	-	-	-	-	-	-	-	-	-	-	-	-	-	-	-	-	-	-	-	-	-	-	-	-	-	-	-	-	-	-	-	-	-	-
1_3699843	1	11.76151822	BB	AA	AA	BB	BB	BB	AA	AA	BB	AA	BB	AA	BB	-	-	AA	BB	BB	BB	BB	BB	AA	AA	AA	AA	BB	BB	BB	BB	AA	BB	AA	AA	BB	BB	BB	BB	BB	BB	AA	BB	AA	AA	BB	AA	BB	-
1_3720848	1	11.76151827	BB	AA	AA	BB	BB	BB	AA	AA	BB	AA	BB	AA	BB	-	-	AA	BB	BB	BB	BB	BB	AA	AA	AA	AA	BB	BB	BB	BB	AA	BB	AA	AA	BB	BB	BB	BB	BB	BB	AA	BB	AA	AA	BB	AA	BB	-
1_3733921	1	11.76151832	BB	AA	AA	BB	BB	BB	AA	AA	BB	AA	BB	AA	BB	-	-	AA	BB	BB	BB	BB	BB	AA	AA	AA	AA	BB	BB	BB	BB	AA	BB	AA	AA	BB	BB	BB	BB	BB	BB	AA	BB	AA	AA	BB	AA	BB	-
1_3735383	1	11.76151837	-	-	-	-	-	-	-	-	-	-	-	-	-	-	-	-	-	-	-	-	-	-	-	-	-	-	-	-	-	-	-	-	-	-	-	-	-	-	-	-	-	-	-	-	-	-	-
1_3740936	1	11.76151842	BB	AA	AA	BB	BB	BB	AA	AA	BB	AA	BB	AA	BB	-	-	AA	BB	BB	BB	BB	BB	AA	AA	AA	AA	BB	BB	BB	BB	AA	BB	AA	AA	BB	BB	BB	BB	BB	BB	AA	BB	AA	AA	BB	AA	BB	-
1_3741228	1	11.76151847	-	-	-	-	-	-	-	-	-	-	-	-	-	-	-	-	-	-	-	-	-	-	-	-	-	-	-	-	-	-	-	-	-	-	-	-	-	-	-	-	-	-	-	-	-	-	-
1_3746119	1	11.76151852	-	-	-	-	-	-	-	-	-	-	-	-	-	-	-	-	-	-	-	-	-	-	-	-	-	-	-	-	-	-	-	-	-	-	-	-	-	-	-	-	-	-	-	-	-	-	-
1_3755563	1	11.76151857	BB	AA	AA	BB	BB	BB	AA	AA	BB	AA	BB	AA	BB	-	-	AA	BB	BB	BB	BB	BB	AA	AA	AA	AA	BB	BB	BB	BB	AA	BB	AA	AA	BB	BB	BB	BB	BB	BB	AA	BB	AA	AA	BB	AA	BB	-
1_3760729	1	11.76151862	BB	AA	AA	BB	BB	BB	AA	AA	BB	AA	BB	AA	BB	-	-	AA	BB	BB	BB	BB	BB	AA	AA	AA	AA	BB	BB	BB	BB	AA	BB	AA	AA	BB	BB	BB	BB	BB	BB	AA	BB	AA	AA	BB	AA	BB	-
1_3763435	1	11.76151867	BB	AA	AA	BB	BB	BB	AA	AA	BB	AA	BB	AA	BB	-	-	AA	BB	BB	BB	BB	BB	AA	AA	AA	AA	BB	BB	BB	BB	AA	BB	AA	AA	BB	BB	BB	BB	BB	BB	AA	BB	AA	AA	BB	AA	BB	-
1_3773054	1	11.83344009	BB	AA	AA	BB	BB	BB	AA	AA	BB	AA	BB	AA	BB	-	-	AA	BB	BB	BB	BB	BB	AA	AA	AA	AA	BB	BB	BB	BB	AA	BB	AA	AA	BB	BB	BB	BB	BB	BB	AA	BB	AA	AA	BB	AA	BB	-
1_3774031	1	11.83344014	BB	AA	AA	BB	BB	BB	AA	AA	BB	AA	BB	AA	BB	-	-	AA	BB	BB	BB	BB	BB	AA	AA	AA	AA	BB	BB	BB	BB	AA	BB	AA	AA	BB	BB	BB	BB	BB	BB	AA	BB	AA	AA	BB	AA	BB	-
1_3774564	1	11.83344019	-	-	-	-	-	-	-	-	-	-	-	-	-	-	-	-	-	-	-	-	-	-	-	-	-	-	-	-	-	-	-	-	-	-	-	-	-	-	-	-	-	-	-	-	-	-	-
1_3774708	1	11.83344024	BB	AA	AA	BB	BB	BB	AA	AA	BB	AA	BB	AA	BB	-	-	AA	BB	BB	BB	BB	BB	AA	AA	AA	AA	BB	BB	BB	BB	AA	BB	AA	AA	BB	BB	BB	BB	BB	BB	AA	BB	AA	AA	BB	AA	BB	-
1_3778997	1	11.83344029	-	-	-	-	-	-	-	-	-	-	-	-	-	-	-	-	-	-	-	-	-	-	-	-	-	-	-	-	-	-	-	-	-	-	-	-	-	-	-	-	-	-	-	-	-	-	-
1_3779713	1	11.83344034	-	-	-	-	-	-	-	-	-	-	-	-	-	-	-	-	-	-	-	-	-	-	-	-	-	-	-	-	-	-	-	-	-	-	-	-	-	-	-	-	-	-	-	-	-	-	-
1_3780260	1	11.83344039	BB	AA	AA	BB	BB	BB	AA	AA	BB	AA	BB	AA	BB	-	-	AA	BB	BB	BB	BB	BB	AA	AA	AA	AA	BB	BB	BB	BB	AA	BB	AA	AA	BB	BB	BB	BB	BB	BB	AA	BB	AA	AA	BB	AA	BB	-
1_3787623	1	11.83344044	BB	AA	AA	BB	BB	BB	AA	AA	BB	AA	BB	AA	BB	-	-	AA	BB	BB	BB	BB	BB	AA	AA	AA	AA	BB	BB	BB	BB	AA	BB	AA	AA	BB	BB	BB	BB	BB	BB	AA	BB	AA	AA	BB	AA	BB	-
1_3796188	1	11.83344049	-	-	-	-	-	-	-	-	-	-	-	-	-	-	-	-	-	-	-	-	-	-	-	-	-	-	-	-	-	-	-	-	-	-	-	-	-	-	-	-	-	-	-	-	-	-	-
1_3802444	1	11.83344054	BB	AA	AA	BB	BB	BB	AA	AA	BB	AA	BB	AA	BB	-	-	AA	BB	BB	BB	BB	BB	AA	AA	AA	AA	BB	BB	BB	BB	AA	BB	AA	AA	BB	BB	BB	BB	BB	BB	AA	BB	AA	AA	BB	AA	BB	-
1_3802717	1	11.83344059	BB	AA	AA	BB	BB	BB	AA	AA	BB	AA	BB	AA	BB	-	-	AA	BB	BB	BB	BB	BB	AA	AA	AA	AA	BB	BB	BB	BB	AA	BB	AA	AA	BB	BB	BB	BB	BB	BB	AA	BB	AA	AA	BB	AA	BB	-
1_3805002	1	11.83344064	BB	AA	AA	BB	BB	BB	AA	AA	BB	AA	BB	AA	BB	-	-	AA	BB	BB	BB	BB	BB	AA	AA	AA	AA	BB	BB	BB	BB	AA	BB	AA	AA	BB	BB	BB	BB	BB	BB	AA	BB	AA	AA	BB	AA	BB	-
1_3828362	1	11.83344069	BB	AA	AA	BB	BB	BB	AA	AA	BB	AA	BB	AA	BB	-	-	AA	BB	BB	BB	BB	BB	AA	AA	AA	AA	BB	BB	BB	BB	AA	BB	AA	AA	BB	BB	BB	BB	BB	BB	AA	BB	AA	AA	BB	AA	BB	-
1_3828493	1	11.83344074	BB	AA	AA	BB	BB	BB	AA	AA	BB	AA	BB	AA	BB	-	-	AA	BB	BB	BB	BB	BB	AA	AA	AA	AA	BB	BB	BB	BB	AA	BB	AA	AA	BB	BB	BB	BB	BB	BB	AA	BB	AA	AA	BB	AA	BB	-
1_3845280	1	11.83344079	BB	AA	AA	BB	BB	BB	AA	AA	BB	AA	BB	AA	BB	-	-	AA	BB	BB	BB	BB	BB	AA	AA	AA	AA	BB	BB	BB	BB	AA	BB	AA	AA	BB	BB	BB	BB	BB	BB	AA	BB	AA	AA	BB	AA	BB	-
1_3858439	1	11.83344084	BB	AA	AA	BB	BB	BB	AA	AA	BB	AA	BB	AA	BB	-	-	AA	BB	BB	BB	BB	BB	AA	AA	AA	AA	BB	BB	BB	BB	AA	BB	AA	AA	BB	BB	BB	BB	BB	BB	AA	BB	AA	AA	BB	AA	BB	-
1_3858855	1	11.83344089	BB	AA	AA	BB	BB	BB	AA	AA	BB	AA	BB	AA	BB	-	-	AA	BB	BB	BB	BB	BB	AA	AA	AA	AA	BB	BB	BB	BB	AA	BB	AA	AA	BB	BB	BB	BB	BB	BB	AA	BB	AA	AA	BB	AA	BB	-
1_3867347	1	11.83344094	BB	AA	AA	BB	BB	BB	AA	AA	BB	AA	BB	AA	BB	-	-	AA	BB	BB	BB	BB	BB	AA	AA	AA	AA	BB	BB	BB	BB	AA	BB	AA	AA	BB	BB	BB	BB	BB	BB	AA	BB	AA	AA	BB	AA	BB	-
1_3870242	1	11.83344099	BB	AA	AA	BB	BB	BB	AA	AA	BB	AA	BB	AA	BB	-	-	AA	BB	BB	BB	BB	BB	AA	AA	AA	AA	BB	BB	BB	BB	AA	BB	AA	AA	BB	BB	BB	BB	BB	BB	AA	BB	AA	AA	BB	AA	BB	-
1_3870865	1	11.83344104	-	-	-	-	-	-	-	-	-	-	-	-	-	-	-	-	-	-	-	-	-	-	-	-	-	-	-	-	-	-	-	-	-	-	-	-	-	-	-	-	-	-	-	-	-	-	-
1_3887855	1	11.83344109	BB	AA	AA	BB	BB	BB	AA	AA	BB	AA	BB	AA	BB	-	-	AA	BB	BB	BB	BB	BB	AA	AA	AA	AA	BB	BB	BB	BB	AA	BB	AA	AA	BB	BB	BB	BB	BB	BB	AA	BB	AA	AA	BB	AA	BB	-
1_3912288	1	11.89491042	BB	AA	AA	BB	BB	BB	AA	AA	BB	AA	BB	AA	BB	-	-	AA	BB	BB	BB	BB	BB	AA	AA	AA	AA	BB	BB	BB	BB	AA	BB	AA	AA	BB	BB	BB	BB	BB	BB	AA	BB	AA	AA	BB	AA	BB	-
1_3920284	1	11.89491047	BB	AA	AA	BB	BB	BB	AA	AA	BB	AA	BB	AA	BB	-	-	AA	BB	BB	BB	BB	BB	AA	AA	AA	AA	BB	BB	BB	BB	AA	BB	AA	AA	BB	BB	BB	BB	BB	BB	AA	BB	AA	AA	BB	AA	BB	-
1_3926320	1	11.89491052	-	-	-	-	-	-	-	-	-	-	-	-	-	-	-	-	-	-	-	-	-	-	-	-	-	-	-	-	-	-	-	-	-	-	-	-	-	-	-	-	-	-	-	-	-	-	-
1_3926885	1	11.89491057	BB	AA	AA	BB	BB	BB	AA	AA	BB	AA	BB	AA	BB	-	-	AA	BB	BB	BB	BB	BB	AA	AA	AA	AA	BB	BB	BB	BB	AA	BB	AA	AA	BB	BB	BB	BB	BB	BB	AA	BB	AA	AA	BB	AA	BB	-
1_3935804	1	11.89491062	-	-	-	-	-	-	-	-	-	-	-	-	-	-	-	-	-	-	-	-	-	-	-	-	-	-	-	-	-	-	-	-	-	-	-	-	-	-	-	-	-	-	-	-	-	-	-
1_3948738	1	11.89491067	BB	AA	AA	BB	BB	BB	AA	AA	BB	AA	BB	AA	BB	-	-	AA	BB	BB	BB	BB	BB	AA	AA	AA	AA	BB	BB	BB	BB	AA	BB	AA	AA	BB	BB	BB	BB	BB	BB	AA	BB	AA	AA	BB	AA	BB	-
1_3959256	1	11.89491072	-	-	-	-	-	-	-	-	-	-	-	-	-	-	-	-	-	-	-	-	-	-	-	-	-	-	-	-	-	-	-	-	-	-	-	-	-	-	-	-	-	-	-	-	-	-	-
1_3961217	1	11.89491077	-	-	-	-	-	-	-	-	-	-	-	-	-	-	-	-	-	-	-	-	-	-	-	-	-	-	-	-	-	-	-	-	-	-	-	-	-	-	-	-	-	-	-	-	-	-	-
1_3969383	1	11.89491082	-	-	-	-	-	-	-	-	-	-	-	-	-	-	-	-	-	-	-	-	-	-	-	-	-	-	-	-	-	-	-	-	-	-	-	-	-	-	-	-	-	-	-	-	-	-	-
1_3990189	1	12.12108654	-	-	-	-	-	-	-	-	-	-	-	-	-	-	-	-	-	-	-	-	-	-	-	-	-	-	-	-	-	-	-	-	-	-	-	-	-	-	-	-	-	-	-	-	-	-	-
1_3994044	1	12.12108659	BB	AA	AA	BB	BB	BB	AA	AA	BB	AA	BB	AA	BB	-	-	AA	BB	BB	BB	BB	BB	AA	AA	AA	AA	BB	BB	BB	BB	AA	BB	AA	AA	BB	BB	BB	BB	BB	BB	AA	BB	AA	AA	BB	AA	BB	-
1_3995122	1	12.12108664	BB	AA	AA	BB	BB	BB	AA	AA	BB	AA	BB	AA	BB	-	-	AA	BB	BB	BB	BB	BB	AA	AA	AA	AA	BB	BB	BB	BB	AA	BB	AA	AA	BB	BB	BB	BB	BB	BB	AA	BB	AA	AA	BB	AA	BB	-
1_3995148	1	12.12108669	BB	AA	AA	BB	BB	BB	AA	AA	BB	AA	BB	AA	BB	-	-	AA	BB	BB	BB	BB	BB	AA	AA	AA	AA	BB	BB	BB	BB	AA	BB	AA	AA	BB	BB	BB	BB	BB	BB	AA	BB	AA	AA	BB	AA	BB	-
1_4003945	1	12.12108674	BB	AA	AA	BB	BB	BB	AA	AA	BB	AA	BB	AA	BB	-	-	AA	BB	BB	BB	BB	BB	AA	AA	AA	AA	BB	BB	BB	BB	AA	BB	AA	AA	BB	BB	BB	BB	BB	BB	AA	BB	AA	AA	BB	AA	BB	-
1_4008760	1	12.12108679	BB	AA	AA	BB	BB	BB	AA	AA	BB	AA	BB	AA	BB	-	-	AA	BB	BB	BB	BB	BB	AA	AA	AA	AA	BB	BB	BB	BB	AA	BB	AA	AA	BB	BB	BB	BB	BB	BB	AA	BB	AA	AA	BB	AA	BB	-
1_4009837	1	12.12108684	-	-	-	-	-	-	-	-	-	-	-	-	-	-	-	-	-	-	-	-	-	-	-	-	-	-	-	-	-	-	-	-	-	-	-	-	-	-	-	-	-	-	-	-	-	-	-
1_4014435	1	12.12108689	BB	AA	AA	BB	BB	BB	AA	AA	BB	AA	BB	AA	BB	-	-	AA	BB	BB	BB	BB	BB	AA	AA	AA	AA	BB	BB	BB	BB	AA	BB	AA	AA	BB	BB	BB	BB	BB	BB	AA	BB	AA	AA	BB	AA	BB	-
1_4018503	1	12.12108694	BB	AA	AA	BB	BB	BB	AA	AA	BB	AA	BB	AA	BB	-	-	AA	BB	BB	BB	BB	BB	AA	AA	AA	AA	BB	BB	BB	BB	AA	BB	AA	AA	BB	BB	BB	BB	BB	BB	AA	BB	AA	AA	BB	AA	BB	-
1_4026311	1	12.12108699	BB	AA	AA	BB	BB	BB	AA	AA	BB	AA	BB	AA	BB	-	-	AA	BB	BB	BB	BB	BB	AA	AA	AA	AA	BB	BB	BB	BB	AA	BB	AA	AA	BB	BB	BB	BB	BB	BB	AA	BB	AA	AA	BB	AA	BB	-
1_4032248	1	12.12108704	BB	AA	AA	BB	BB	BB	AA	AA	BB	AA	BB	AA	BB	-	-	AA	BB	BB	BB	BB	BB	AA	AA	AA	AA	BB	BB	BB	BB	AA	BB	AA	AA	BB	BB	BB	BB	BB	BB	AA	BB	AA	AA	BB	AA	BB	-
1_4042507	1	12.78803994	-	-	-	-	-	-	-	-	-	-	-	-	-	-	-	-	-	-	-	-	-	-	-	-	-	-	-	-	-	-	-	-	-	-	-	-	-	-	-	-	-	-	-	-	-	-	-
1_4042712	1	12.78803999	-	-	-	-	-	-	-	-	-	-	-	-	-	-	-	-	-	-	-	-	-	-	-	-	-	-	-	-	-	-	-	-	-	-	-	-	-	-	-	-	-	-	-	-	-	-	-
1_4044075	1	12.78804004	BB	AA	AA	BB	BB	BB	AA	AA	BB	AA	BB	AA	BB	-	-	AA	BB	BB	BB	BB	BB	AA	AA	AA	AA	BB	BB	BB	BB	AA	BB	AA	AA	BB	BB	BB	BB	BB	BB	AA	BB	AA	AA	BB	AA	BB	-
1_4067087	1	12.78804009	BB	AA	AA	BB	BB	BB	AA	AA	BB	AA	BB	AA	BB	-	-	AA	BB	BB	BB	BB	BB	AA	AA	AA	AA	BB	BB	BB	BB	AA	BB	AA	AA	BB	BB	BB	BB	BB	BB	AA	BB	AA	AA	BB	AA	BB	-
1_4083660	1	12.78804014	-	-	-	-	-	-	-	-	-	-	-	-	-	-	-	-	-	-	-	-	-	-	-	-	-	-	-	-	-	-	-	-	-	-	-	-	-	-	-	-	-	-	-	-	-	-	-
1_4127466	1	12.78804019	BB	AA	AA	BB	BB	BB	AA	AA	BB	AA	BB	AA	BB	-	-	AA	BB	BB	BB	BB	BB	AA	AA	AA	AA	BB	BB	BB	BB	AA	BB	AA	AA	BB	BB	BB	BB	BB	BB	AA	BB	AA	AA	BB	AA	BB	-
1_4130800	1	12.78804024	BB	AA	AA	BB	BB	BB	AA	AA	BB	AA	BB	AA	BB	-	-	AA	BB	BB	BB	BB	BB	AA	AA	AA	AA	BB	BB	BB	BB	AA	BB	AA	AA	BB	BB	BB	BB	BB	BB	AA	BB	AA	AA	BB	AA	BB	-
1_4130939	1	12.78804029	-	-	-	-	-	-	-	-	-	-	-	-	-	-	-	-	-	-	-	-	-	-	-	-	-	-	-	-	-	-	-	-	-	-	-	-	-	-	-	-	-	-	-	-	-	-	-
1_4133345	1	12.78804034	BB	AA	AA	BB	BB	BB	AA	AA	BB	AA	BB	AA	BB	-	-	AA	BB	BB	BB	BB	BB	AA	AA	AA	AA	BB	BB	BB	BB	AA	BB	AA	AA	BB	BB	BB	BB	BB	BB	AA	BB	AA	AA	BB	AA	BB	-
1_4139802	1	12.78804039	BB	AA	AA	BB	BB	BB	AA	AA	BB	AA	BB	AA	BB	-	-	AA	BB	BB	BB	BB	BB	AA	AA	AA	AA	BB	BB	BB	BB	AA	BB	AA	AA	BB	BB	BB	BB	BB	BB	AA	BB	AA	AA	BB	AA	BB	-
1_4153078	1	12.78804044	-	-	-	-	-	-	-	-	-	-	-	-	-	-	-	-	-	-	-	-	-	-	-	-	-	-	-	-	-	-	-	-	-	-	-	-	-	-	-	-	-	-	-	-	-	-	-
1_4169521	1	12.78804049	BB	AA	AA	BB	BB	BB	AA	AA	BB	AA	BB	AA	BB	-	-	AA	BB	BB	BB	BB	BB	AA	AA	AA	AA	BB	BB	BB	BB	AA	BB	AA	AA	BB	BB	BB	BB	BB	BB	AA	BB	AA	AA	BB	AA	BB	-
1_4186510	1	13.94095204	BB	AA	AA	BB	BB	BB	AA	AA	BB	AA	BB	AA	BB	BB	AA	AA	BB	BB	BB	BB	BB	AA	AA	AA	AA	BB	BB	BB	BB	AA	BB	AA	AA	BB	BB	BB	BB	BB	BB	AA	BB	AA	AA	BB	AA	BB	-
1_4199596	1	13.94095209	BB	AA	AA	BB	BB	BB	AA	AA	BB	AA	BB	AA	BB	BB	AA	AA	BB	BB	BB	BB	BB	AA	AA	AA	AA	BB	BB	BB	BB	AA	BB	AA	AA	BB	BB	BB	BB	BB	BB	AA	BB	AA	AA	BB	AA	BB	-
1_4207579	1	13.94095214	BB	AA	AA	BB	BB	BB	AA	AA	BB	AA	BB	AA	BB	BB	AA	AA	BB	BB	BB	BB	BB	AA	AA	AA	AA	BB	BB	BB	BB	AA	BB	AA	AA	BB	BB	BB	BB	BB	BB	AA	BB	AA	AA	BB	AA	BB	-
1_4211407	1	13.94095219	-	-	-	-	-	-	-	-	-	-	-	-	-	-	-	-	-	-	-	-	-	-	-	-	-	-	-	-	-	-	-	-	-	-	-	-	-	-	-	-	-	-	-	-	-	-	-
1_4273596	1	13.94095224	-	-	-	-	-	-	-	-	-	-	-	-	-	-	-	-	-	-	-	-	-	-	-	-	-	-	-	-	-	-	-	-	-	-	-	-	-	-	-	-	-	-	-	-	-	-	-
1_4275225	1	13.94095229	BB	AA	AA	BB	BB	BB	AA	AA	BB	AA	BB	AA	BB	BB	AA	AA	BB	BB	BB	BB	BB	AA	AA	AA	AA	BB	BB	BB	BB	AA	BB	AA	AA	BB	BB	BB	BB	BB	BB	AA	BB	AA	AA	BB	AA	BB	-
1_4292046	1	13.94095234	-	-	-	-	-	-	-	-	-	-	-	-	-	-	-	-	-	-	-	-	-	-	-	-	-	-	-	-	-	-	-	-	-	-	-	-	-	-	-	-	-	-	-	-	-	-	-
1_4297688	1	13.94095239	BB	AA	AA	BB	BB	BB	AA	AA	BB	AA	BB	AA	BB	BB	AA	AA	BB	BB	BB	BB	BB	AA	AA	AA	AA	BB	BB	BB	BB	AA	BB	AA	AA	BB	BB	BB	BB	BB	BB	AA	BB	AA	AA	BB	AA	BB	-
1_4305439	1	13.94095244	BB	AA	AA	BB	BB	BB	AA	AA	BB	AA	BB	AA	BB	BB	AA	AA	BB	BB	BB	BB	BB	AA	AA	AA	AA	BB	BB	BB	BB	AA	BB	AA	AA	BB	BB	BB	BB	BB	BB	AA	BB	AA	AA	BB	AA	BB	-
1_4341516	1	13.94095249	BB	AA	AA	BB	BB	BB	AA	AA	BB	AA	BB	AA	BB	BB	AA	AA	BB	BB	BB	BB	BB	AA	AA	AA	AA	BB	BB	BB	BB	AA	BB	AA	AA	BB	BB	BB	BB	BB	BB	AA	BB	AA	AA	BB	AA	BB	-
1_4342530	1	13.94095254	BB	AA	AA	BB	BB	BB	AA	AA	BB	AA	BB	AA	BB	BB	AA	AA	BB	BB	BB	BB	BB	AA	AA	AA	AA	BB	BB	BB	BB	AA	BB	AA	AA	BB	BB	BB	BB	BB	BB	AA	BB	AA	AA	BB	AA	BB	-
1_4345543	1	13.94095259	BB	AA	AA	BB	BB	BB	AA	AA	BB	AA	BB	AA	BB	BB	AA	AA	BB	BB	BB	BB	BB	AA	AA	AA	AA	BB	BB	BB	BB	AA	BB	AA	AA	BB	BB	BB	BB	BB	BB	AA	BB	AA	AA	BB	AA	BB	-
1_4349314	1	13.94095264	BB	AA	AA	BB	BB	BB	AA	AA	BB	AA	BB	AA	BB	BB	AA	AA	BB	BB	BB	BB	BB	AA	AA	AA	AA	BB	BB	BB	BB	AA	BB	AA	AA	BB	BB	BB	BB	BB	BB	AA	BB	AA	AA	BB	AA	BB	-
1_4349937	1	13.94095269	BB	AA	AA	BB	BB	BB	AA	AA	BB	AA	BB	AA	BB	BB	AA	AA	BB	BB	BB	BB	BB	AA	AA	AA	AA	BB	BB	BB	BB	AA	BB	AA	AA	BB	BB	BB	BB	BB	BB	AA	BB	AA	AA	BB	AA	BB	-
1_4349985	1	13.94095274	BB	AA	AA	BB	BB	BB	AA	AA	BB	AA	BB	AA	BB	BB	AA	AA	BB	BB	BB	BB	BB	AA	AA	AA	AA	BB	BB	BB	BB	AA	BB	AA	AA	BB	BB	BB	BB	BB	BB	AA	BB	AA	AA	BB	AA	BB	-
1_4351479	1	13.94095279	BB	AA	AA	BB	BB	BB	AA	AA	BB	AA	BB	AA	BB	BB	AA	AA	BB	BB	BB	BB	BB	AA	AA	AA	AA	BB	BB	BB	BB	AA	BB	AA	AA	BB	BB	BB	BB	BB	BB	AA	BB	AA	AA	BB	AA	BB	-
1_4359394	1	13.94095284	BB	AA	AA	BB	BB	BB	AA	AA	BB	AA	BB	AA	BB	BB	AA	AA	BB	BB	BB	BB	BB	AA	AA	AA	AA	BB	BB	BB	BB	AA	BB	AA	AA	BB	BB	BB	BB	BB	BB	AA	BB	AA	AA	BB	AA	BB	-
1_4361693	1	14.38803294	BB	AA	AA	BB	BB	BB	AA	AA	BB	AA	BB	AA	BB	BB	AA	AA	BB	BB	BB	BB	BB	AA	AA	AA	AA	BB	BB	BB	BB	AA	BB	AA	AA	BB	BB	BB	BB	BB	BB	AA	BB	AA	AA	BB	AA	BB	-
1_4375411	1	14.38803299	BB	AA	AA	BB	BB	BB	AA	AA	BB	AA	BB	AA	BB	BB	AA	AA	BB	BB	BB	BB	BB	AA	AA	AA	AA	BB	BB	BB	BB	AA	BB	AA	AA	BB	BB	BB	BB	BB	BB	AA	BB	AA	AA	BB	AA	BB	-
1_4415077	1	14.38803304	BB	AA	AA	BB	BB	BB	AA	AA	BB	AA	BB	AA	BB	BB	AA	AA	BB	BB	BB	BB	BB	AA	AA	AA	AA	BB	BB	BB	BB	AA	BB	AA	AA	BB	BB	BB	BB	BB	BB	AA	BB	AA	AA	BB	AA	BB	-
1_4422339	1	14.38803309	BB	AA	AA	BB	BB	BB	AA	AA	BB	AA	BB	AA	BB	BB	AA	AA	BB	BB	BB	BB	BB	AA	AA	AA	AA	BB	BB	BB	BB	AA	BB	AA	AA	BB	BB	BB	BB	BB	BB	AA	BB	AA	AA	BB	AA	BB	-
1_4424693	1	14.38803314	-	-	-	-	-	-	-	-	-	-	-	-	-	-	-	-	-	-	-	-	-	-	-	-	-	-	-	-	-	-	-	-	-	-	-	-	-	-	-	-	-	-	-	-	-	-	-
1_4432380	1	14.38803319	BB	AA	AA	BB	BB	BB	AA	AA	BB	AA	BB	AA	BB	BB	AA	AA	BB	BB	BB	BB	BB	AA	AA	AA	AA	BB	BB	BB	BB	AA	BB	AA	AA	BB	BB	BB	BB	BB	BB	AA	BB	AA	AA	BB	AA	BB	-
1_4445573	1	14.38803324	-	-	-	-	-	-	-	-	-	-	-	-	-	-	-	-	-	-	-	-	-	-	-	-	-	-	-	-	-	-	-	-	-	-	-	-	-	-	-	-	-	-	-	-	-	-	-
1_4445848	1	14.38803329	BB	AA	AA	BB	BB	BB	AA	AA	BB	AA	BB	AA	BB	BB	AA	AA	BB	BB	BB	BB	BB	AA	AA	AA	AA	BB	BB	BB	BB	AA	BB	AA	AA	BB	BB	BB	BB	BB	BB	AA	BB	AA	AA	BB	AA	BB	-
1_4453648	1	14.38803334	-	-	-	-	-	-	-	-	-	-	-	-	-	-	-	-	-	-	-	-	-	-	-	-	-	-	-	-	-	-	-	-	-	-	-	-	-	-	-	-	-	-	-	-	-	-	-
1_4458843	1	14.38803339	BB	AA	AA	BB	BB	BB	AA	AA	BB	AA	BB	AA	BB	BB	AA	AA	BB	BB	BB	BB	BB	AA	AA	AA	AA	BB	BB	BB	BB	AA	BB	AA	AA	BB	BB	BB	BB	BB	BB	AA	BB	AA	AA	BB	AA	BB	-
1_4470639	1	14.38803344	BB	AA	AA	BB	BB	BB	AA	AA	BB	AA	BB	AA	BB	BB	AA	AA	BB	BB	BB	BB	BB	AA	AA	AA	AA	BB	BB	BB	BB	AA	BB	AA	AA	BB	BB	BB	BB	BB	BB	AA	BB	AA	AA	BB	AA	BB	-
1_4480462	1	14.38803349	-	-	-	-	-	-	-	-	-	-	-	-	-	-	-	-	-	-	-	-	-	-	-	-	-	-	-	-	-	-	-	-	-	-	-	-	-	-	-	-	-	-	-	-	-	-	-
1_4490566	1	14.38803354	-	-	-	-	-	-	-	-	-	-	-	-	-	-	-	-	-	-	-	-	-	-	-	-	-	-	-	-	-	-	-	-	-	-	-	-	-	-	-	-	-	-	-	-	-	-	-
1_4493408	1	14.38803359	-	-	-	-	-	-	-	-	-	-	-	-	-	-	-	-	-	-	-	-	-	-	-	-	-	-	-	-	-	-	-	-	-	-	-	-	-	-	-	-	-	-	-	-	-	-	-
1_4497293	1	14.38803364	BB	AA	AA	BB	BB	BB	AA	AA	BB	AA	BB	AA	BB	BB	AA	AA	BB	BB	BB	BB	BB	AA	AA	AA	AA	BB	BB	BB	BB	AA	BB	AA	AA	BB	BB	BB	BB	BB	BB	AA	BB	AA	AA	-	AA	BB	-
1_4502781	1	14.38803369	BB	AA	AA	BB	BB	BB	AA	AA	BB	AA	BB	AA	BB	BB	AA	AA	BB	BB	BB	BB	BB	AA	AA	AA	AA	BB	BB	BB	BB	AA	BB	AA	AA	BB	BB	BB	BB	BB	BB	AA	BB	AA	AA	-	AA	BB	-
1_4507555	1	14.38803374	BB	AA	AA	BB	BB	BB	AA	AA	BB	AA	BB	AA	BB	BB	AA	AA	BB	BB	BB	BB	BB	AA	AA	AA	AA	BB	BB	BB	BB	AA	BB	AA	AA	BB	BB	BB	BB	BB	BB	AA	BB	AA	AA	-	AA	BB	-
1_4507750	1	14.38803379	BB	AA	AA	BB	BB	BB	AA	AA	BB	AA	BB	AA	BB	BB	AA	AA	BB	BB	BB	BB	BB	AA	AA	AA	AA	BB	BB	BB	BB	AA	BB	AA	AA	BB	BB	BB	BB	BB	BB	AA	BB	AA	AA	-	AA	BB	-
1_4513389	1	14.38803384	-	-	-	-	-	-	-	-	-	-	-	-	-	-	-	-	-	-	-	-	-	-	-	-	-	-	-	-	-	-	-	-	-	-	-	-	-	-	-	-	-	-	-	-	-	-	-
1_4541160	1	14.38803389	BB	AA	AA	BB	BB	BB	AA	AA	BB	AA	BB	AA	BB	BB	AA	AA	BB	BB	BB	BB	BB	AA	AA	AA	AA	BB	BB	BB	BB	AA	BB	AA	AA	BB	BB	BB	BB	BB	BB	AA	BB	AA	AA	-	AA	BB	-
1_4542122	1	14.38803394	BB	AA	AA	BB	BB	BB	AA	AA	BB	AA	BB	AA	BB	BB	AA	AA	BB	BB	BB	BB	BB	AA	AA	AA	AA	BB	BB	BB	BB	AA	BB	AA	AA	BB	BB	BB	BB	BB	BB	AA	BB	AA	AA	-	AA	BB	-
1_4596540	1	15.64970502	-	-	-	-	-	-	-	-	-	-	-	-	-	-	-	-	-	-	-	-	-	-	-	-	-	-	-	-	-	-	-	-	-	-	-	-	-	-	-	-	-	-	-	-	-	-	-
1_4597902	1	15.64970507	BB	AA	AA	BB	BB	BB	AA	AA	BB	AA	BB	AA	BB	BB	AA	AA	BB	BB	BB	BB	BB	AA	AA	AA	AA	BB	BB	BB	BB	AA	BB	AA	AA	BB	BB	BB	BB	BB	BB	AA	BB	AA	AA	-	AA	BB	-
1_4600160	1	15.64970512	BB	AA	AA	BB	BB	BB	AA	AA	BB	AA	BB	AA	BB	BB	AA	AA	BB	BB	BB	BB	BB	AA	AA	AA	AA	BB	BB	BB	BB	AA	BB	AA	AA	BB	BB	BB	BB	BB	BB	AA	BB	AA	AA	-	AA	BB	-
1_4613090	1	15.64970517	BB	AA	AA	BB	BB	BB	AA	AA	BB	AA	BB	AA	BB	BB	AA	AA	BB	BB	BB	BB	BB	AA	AA	AA	AA	BB	BB	BB	BB	AA	BB	AA	AA	BB	BB	BB	BB	BB	BB	AA	BB	AA	AA	-	AA	BB	-
1_4619479	1	15.64970522	BB	AA	AA	BB	BB	BB	AA	AA	BB	AA	BB	AA	BB	BB	AA	AA	BB	BB	BB	BB	BB	AA	AA	AA	AA	BB	BB	BB	BB	AA	BB	AA	AA	BB	BB	BB	BB	BB	BB	AA	BB	AA	AA	-	AA	BB	-
1_4640900	1	15.64970527	-	-	-	-	-	-	-	-	-	-	-	-	-	-	-	-	-	-	-	-	-	-	-	-	-	-	-	-	-	-	-	-	-	-	-	-	-	-	-	-	-	-	-	-	-	-	-
1_4663285	1	15.64970532	BB	AA	AA	BB	BB	BB	AA	AA	BB	AA	BB	AA	BB	BB	AA	AA	BB	BB	BB	BB	BB	AA	AA	AA	AA	BB	BB	BB	BB	AA	BB	AA	AA	BB	BB	BB	BB	BB	BB	AA	BB	AA	AA	-	AA	BB	-
1_4669229	1	15.64970537	BB	AA	AA	BB	BB	BB	AA	AA	BB	AA	BB	AA	BB	BB	AA	AA	BB	BB	BB	BB	BB	AA	AA	AA	AA	BB	BB	BB	BB	AA	BB	AA	AA	BB	BB	BB	BB	BB	BB	AA	BB	AA	AA	-	AA	BB	-
1_4701112	1	15.64970542	BB	AA	AA	BB	BB	BB	AA	AA	BB	AA	BB	AA	BB	BB	AA	AA	BB	BB	BB	BB	BB	AA	AA	AA	AA	BB	BB	BB	BB	AA	BB	AA	AA	BB	BB	BB	BB	BB	BB	AA	BB	AA	AA	-	AA	BB	-
1_4782078	1	15.64970547	BB	AA	AA	BB	BB	BB	AA	AA	BB	AA	BB	AA	BB	BB	AA	AA	BB	BB	BB	BB	BB	AA	AA	AA	AA	BB	BB	BB	BB	AA	BB	AA	AA	BB	BB	BB	BB	BB	BB	AA	BB	AA	AA	-	AA	BB	-
1_4810395	1	15.64970552	BB	AA	AA	BB	BB	BB	AA	AA	BB	AA	BB	AA	BB	BB	AA	AA	BB	BB	BB	BB	BB	AA	AA	AA	AA	BB	BB	BB	BB	AA	BB	AA	AA	BB	BB	BB	BB	BB	BB	AA	BB	AA	AA	-	AA	BB	-
1_4811010	1	15.64970557	BB	AA	AA	BB	BB	BB	AA	AA	BB	AA	BB	AA	BB	BB	AA	AA	BB	BB	BB	BB	BB	AA	AA	AA	AA	BB	BB	BB	BB	AA	BB	AA	AA	BB	BB	BB	BB	BB	BB	AA	BB	AA	AA	-	AA	BB	-
1_4824638	1	16.40496653	-	-	-	-	-	-	-	-	-	-	-	-	-	-	-	-	-	-	-	-	-	-	-	-	-	-	-	-	-	-	-	-	-	-	-	-	-	-	-	-	-	-	-	-	-	-	-
1_4824806	1	16.40496658	-	-	-	-	-	-	-	-	-	-	-	-	-	-	-	-	-	-	-	-	-	-	-	-	-	-	-	-	-	-	-	-	-	-	-	-	-	-	-	-	-	-	-	-	-	-	-
1_4831344	1	16.40496663	BB	AA	AA	BB	BB	BB	AA	AA	BB	AA	BB	AA	BB	BB	AA	AA	BB	BB	BB	BB	BB	AA	AA	AA	AA	BB	BB	BB	BB	AA	BB	AA	AA	BB	BB	BB	BB	BB	BB	AA	BB	AA	AA	-	AA	BB	-
1_4866028	1	16.40496668	BB	AA	AA	BB	BB	BB	AA	AA	BB	AA	BB	AA	BB	BB	AA	AA	BB	BB	BB	BB	BB	AA	AA	AA	AA	BB	BB	BB	BB	AA	BB	AA	AA	BB	BB	BB	BB	BB	BB	AA	BB	AA	AA	-	AA	BB	-
1_4868171	1	16.40496673	-	-	-	-	-	-	-	-	-	-	-	-	-	-	-	-	-	-	-	-	-	-	-	-	-	-	-	-	-	-	-	-	-	-	-	-	-	-	-	-	-	-	-	-	-	-	-
1_4870313	1	16.40496678	-	-	-	-	-	-	-	-	-	-	-	-	-	-	-	-	-	-	-	-	-	-	-	-	-	-	-	-	-	-	-	-	-	-	-	-	-	-	-	-	-	-	-	-	-	-	-
1_4886636	1	16.97686124	BB	AA	AA	BB	BB	BB	AA	AA	BB	AA	BB	AA	BB	BB	AA	AA	BB	BB	BB	BB	BB	AA	AA	AA	AA	BB	BB	BB	BB	AA	BB	AA	AA	BB	BB	BB	BB	BB	BB	AA	BB	AA	AA	-	AA	BB	-
1_4890660	1	16.97686129	BB	AA	AA	BB	BB	BB	AA	AA	BB	AA	BB	AA	BB	BB	AA	AA	BB	BB	BB	BB	BB	AA	AA	AA	AA	BB	BB	BB	BB	AA	BB	AA	AA	BB	BB	BB	BB	BB	BB	AA	BB	AA	AA	-	AA	BB	-
1_4910361	1	16.97686134	BB	AA	AA	BB	BB	BB	AA	AA	BB	AA	BB	AA	BB	BB	AA	AA	BB	BB	BB	BB	BB	AA	AA	AA	AA	BB	BB	BB	BB	AA	BB	AA	AA	BB	BB	BB	BB	BB	BB	AA	BB	AA	AA	-	AA	BB	-
1_4913233	1	16.97686139	-	-	-	-	-	-	-	-	-	-	-	-	-	-	-	-	-	-	-	-	-	-	-	-	-	-	-	-	-	-	-	-	-	-	-	-	-	-	-	-	-	-	-	-	-	-	-
1_4918129	1	16.97686144	BB	AA	AA	BB	BB	BB	AA	AA	BB	AA	BB	AA	BB	BB	AA	AA	BB	BB	BB	BB	BB	AA	AA	AA	AA	BB	BB	BB	BB	AA	BB	AA	AA	BB	BB	BB	BB	BB	BB	AA	BB	AA	AA	-	AA	BB	-
1_4940588	1	16.97686149	BB	AA	AA	BB	BB	BB	AA	AA	BB	AA	BB	AA	BB	BB	AA	AA	BB	BB	BB	BB	BB	AA	AA	AA	AA	BB	BB	BB	BB	AA	BB	AA	AA	BB	BB	BB	BB	BB	BB	AA	BB	AA	AA	-	AA	BB	-
1_4943929	1	16.97686154	BB	AA	AA	BB	BB	BB	AA	AA	BB	AA	BB	AA	BB	BB	AA	AA	BB	BB	BB	BB	BB	AA	AA	AA	AA	BB	BB	BB	BB	AA	BB	AA	AA	BB	BB	BB	BB	BB	BB	AA	BB	AA	AA	-	AA	BB	-
1_4946664	1	16.97686159	BB	AA	AA	BB	BB	BB	AA	AA	BB	AA	BB	AA	BB	BB	AA	AA	BB	BB	BB	BB	BB	AA	AA	AA	AA	BB	BB	BB	BB	AA	BB	AA	AA	BB	BB	BB	BB	BB	BB	AA	BB	AA	AA	-	AA	BB	-
1_4962747	1	16.97686164	BB	AA	AA	BB	BB	BB	AA	AA	BB	AA	BB	AA	BB	BB	AA	AA	BB	BB	BB	BB	BB	AA	AA	AA	AA	BB	BB	BB	BB	AA	BB	AA	AA	BB	BB	BB	BB	BB	BB	AA	BB	AA	AA	-	AA	BB	-
1_4966392	1	16.97686169	BB	AA	AA	BB	BB	BB	AA	AA	BB	AA	BB	AA	BB	BB	AA	AA	BB	BB	BB	BB	BB	AA	AA	AA	AA	BB	BB	BB	BB	AA	BB	AA	AA	BB	BB	BB	BB	BB	BB	AA	BB	AA	AA	-	AA	BB	-
1_4998702	1	16.97686174	BB	AA	AA	BB	BB	BB	AA	AA	BB	AA	BB	AA	BB	BB	AA	AA	BB	BB	BB	BB	BB	AA	AA	AA	AA	BB	BB	BB	BB	AA	BB	AA	AA	BB	BB	BB	BB	BB	BB	AA	BB	AA	AA	-	AA	BB	-
1_5004157	1	16.97686179	BB	AA	AA	BB	BB	BB	AA	AA	BB	AA	BB	AA	BB	BB	AA	AA	BB	BB	BB	BB	BB	AA	AA	AA	AA	BB	BB	BB	BB	AA	BB	AA	AA	BB	BB	BB	BB	BB	BB	AA	BB	AA	AA	-	AA	BB	-
1_5024540	1	16.97686184	BB	AA	AA	BB	BB	BB	AA	AA	BB	AA	BB	AA	BB	BB	AA	AA	BB	BB	BB	BB	BB	AA	AA	AA	AA	BB	BB	BB	BB	AA	BB	AA	AA	BB	BB	BB	BB	BB	BB	AA	BB	AA	AA	-	AA	BB	-
1_5034722	1	16.97686189	BB	AA	AA	BB	BB	BB	AA	AA	BB	AA	BB	AA	BB	BB	AA	AA	BB	BB	BB	BB	BB	AA	AA	AA	AA	BB	BB	BB	BB	AA	BB	AA	AA	BB	BB	BB	BB	BB	BB	AA	BB	AA	AA	-	AA	BB	-
1_5051923	1	16.97686194	BB	AA	AA	BB	BB	BB	AA	AA	BB	AA	BB	AA	BB	BB	AA	AA	BB	BB	BB	BB	BB	AA	AA	AA	AA	BB	BB	BB	BB	AA	BB	AA	AA	BB	BB	BB	BB	BB	BB	AA	BB	AA	AA	-	AA	BB	-
1_5056073	1	16.97686199	BB	AA	AA	BB	BB	BB	AA	AA	BB	AA	BB	AA	BB	BB	AA	AA	BB	BB	BB	BB	BB	AA	AA	AA	AA	BB	BB	BB	BB	AA	BB	AA	AA	BB	BB	BB	BB	BB	BB	AA	BB	AA	AA	-	AA	BB	-
1_5058946	1	16.97686204	BB	AA	AA	BB	BB	BB	AA	AA	BB	AA	BB	AA	BB	BB	AA	AA	BB	BB	BB	BB	BB	AA	AA	AA	AA	BB	BB	BB	BB	AA	BB	AA	AA	BB	BB	BB	BB	BB	BB	AA	BB	AA	AA	-	AA	BB	-
1_5076809	1	16.97686209	BB	AA	AA	BB	BB	BB	AA	AA	BB	AA	BB	AA	BB	BB	AA	AA	BB	BB	BB	BB	BB	AA	AA	AA	AA	BB	BB	BB	BB	AA	BB	AA	AA	BB	BB	BB	BB	BB	BB	AA	BB	AA	AA	-	AA	BB	-
1_5124479	1	17.89876271	BB	AA	AA	BB	BB	BB	AA	AA	BB	-	BB	AA	BB	BB	AA	AA	BB	BB	BB	BB	BB	AA	AA	AA	AA	BB	BB	BB	BB	AA	BB	AA	AA	BB	BB	BB	BB	BB	BB	AA	BB	AA	AA	-	AA	BB	-
1_5127398	1	17.89876276	BB	AA	AA	BB	BB	BB	AA	AA	BB	-	BB	AA	BB	BB	AA	AA	BB	BB	BB	BB	BB	AA	AA	AA	AA	BB	BB	BB	BB	AA	BB	AA	AA	BB	BB	BB	BB	BB	BB	AA	BB	AA	AA	-	AA	BB	-
1_5132550	1	17.89876281	-	-	-	-	-	-	-	-	-	-	-	-	-	-	-	-	-	-	-	-	-	-	-	-	-	-	-	-	-	-	-	-	-	-	-	-	-	-	-	-	-	-	-	-	-	-	-
1_5134677	1	17.89876286	BB	AA	AA	BB	BB	BB	AA	AA	BB	-	BB	AA	BB	BB	AA	AA	BB	BB	BB	BB	BB	AA	AA	AA	AA	BB	BB	BB	BB	AA	BB	AA	AA	BB	BB	BB	BB	BB	BB	AA	BB	AA	AA	-	AA	BB	-
1_5137308	1	17.89876291	BB	AA	AA	BB	BB	BB	AA	AA	BB	-	BB	AA	BB	BB	AA	AA	BB	BB	BB	BB	BB	AA	AA	AA	AA	BB	BB	BB	BB	AA	BB	AA	AA	BB	BB	BB	BB	BB	BB	AA	BB	AA	AA	-	AA	BB	-
1_5153499	1	17.89876296	BB	AA	AA	BB	BB	BB	AA	AA	BB	-	BB	AA	BB	BB	AA	AA	BB	BB	BB	BB	BB	AA	AA	AA	AA	BB	BB	BB	BB	AA	BB	AA	AA	BB	BB	BB	BB	BB	BB	AA	BB	AA	AA	-	AA	BB	-
1_5167293	1	17.89876301	BB	AA	AA	BB	BB	BB	AA	AA	BB	-	BB	AA	BB	BB	AA	AA	BB	BB	BB	BB	BB	AA	AA	AA	AA	BB	BB	BB	BB	AA	BB	AA	AA	BB	BB	BB	BB	BB	BB	AA	BB	AA	AA	-	AA	BB	-
1_5171291	1	17.89876306	BB	AA	AA	BB	BB	BB	AA	AA	BB	-	BB	AA	BB	BB	AA	AA	BB	BB	BB	BB	BB	AA	AA	AA	AA	BB	BB	BB	BB	AA	BB	AA	AA	BB	BB	BB	BB	BB	BB	AA	BB	AA	AA	-	AA	BB	-
1_5173306	1	17.89876311	BB	AA	AA	BB	BB	BB	AA	AA	BB	-	BB	AA	BB	BB	AA	AA	BB	BB	BB	BB	BB	AA	AA	AA	AA	BB	BB	BB	BB	AA	BB	AA	AA	BB	BB	BB	BB	BB	BB	AA	BB	AA	AA	-	AA	BB	-
1_5175073	1	17.89876316	BB	AA	AA	BB	BB	BB	AA	AA	BB	-	BB	AA	BB	BB	AA	AA	BB	BB	BB	BB	BB	AA	AA	AA	AA	BB	BB	BB	BB	AA	BB	AA	AA	BB	BB	BB	BB	BB	BB	AA	BB	AA	AA	-	AA	BB	-
1_5178032	1	17.89876321	BB	AA	AA	BB	BB	BB	AA	AA	BB	-	BB	AA	BB	BB	AA	AA	BB	BB	BB	BB	BB	AA	AA	AA	AA	BB	BB	BB	BB	AA	BB	AA	AA	BB	BB	BB	BB	BB	BB	AA	BB	AA	AA	-	AA	BB	-
1_5178089	1	17.89876326	BB	AA	AA	BB	BB	BB	AA	AA	BB	-	BB	AA	BB	BB	AA	AA	BB	BB	BB	BB	BB	AA	AA	AA	AA	BB	BB	BB	BB	AA	BB	AA	AA	BB	BB	BB	BB	BB	BB	AA	BB	AA	AA	-	AA	BB	-
1_5178362	1	17.89876331	BB	AA	AA	BB	BB	BB	AA	AA	BB	-	BB	AA	BB	BB	AA	AA	BB	BB	BB	BB	BB	AA	AA	AA	AA	BB	BB	BB	BB	AA	BB	AA	AA	BB	BB	BB	BB	BB	BB	AA	BB	AA	AA	-	AA	BB	-
1_5181050	1	17.89876336	BB	AA	AA	BB	BB	BB	AA	AA	BB	-	BB	AA	BB	BB	AA	AA	BB	BB	BB	BB	BB	AA	AA	AA	AA	BB	BB	BB	BB	AA	BB	AA	AA	BB	BB	BB	BB	BB	BB	AA	BB	AA	AA	-	AA	BB	-
1_5183929	1	17.89876341	BB	AA	AA	BB	BB	BB	AA	AA	BB	-	BB	AA	BB	BB	AA	AA	BB	BB	BB	BB	BB	AA	AA	AA	AA	BB	BB	BB	BB	AA	BB	AA	AA	BB	BB	BB	BB	BB	BB	AA	BB	AA	AA	-	AA	BB	-
1_5187866	1	17.89876346	BB	AA	AA	BB	BB	BB	AA	AA	BB	-	BB	AA	BB	BB	AA	AA	BB	BB	BB	BB	BB	AA	AA	AA	AA	BB	BB	BB	BB	AA	BB	AA	AA	BB	BB	BB	BB	BB	BB	AA	BB	AA	AA	-	AA	BB	-
1_5233149	1	17.89876351	BB	AA	AA	BB	BB	BB	AA	AA	BB	-	BB	AA	BB	BB	AA	AA	BB	BB	BB	BB	BB	AA	AA	AA	AA	BB	BB	BB	BB	AA	BB	AA	AA	BB	BB	BB	BB	BB	BB	AA	BB	AA	AA	-	AA	BB	-
1_5293354	1	17.89876356	BB	AA	AA	BB	BB	BB	AA	AA	BB	BB	BB	AA	BB	BB	AA	AA	BB	BB	BB	BB	BB	AA	AA	AA	AA	BB	BB	BB	BB	AA	BB	AA	AA	BB	BB	BB	BB	BB	BB	-	BB	AA	AA	-	AA	BB	-
1_5344153	1	17.89876361	BB	AA	AA	BB	BB	BB	AA	AA	BB	BB	BB	AA	BB	BB	AA	AA	BB	BB	BB	BB	BB	AA	AA	AA	AA	BB	BB	BB	BB	AA	BB	AA	AA	BB	BB	BB	BB	BB	BB	-	BB	AA	AA	-	AA	BB	-
1_5369432	1	17.89876366	BB	AA	AA	BB	BB	BB	AA	AA	BB	BB	BB	AA	BB	BB	AA	AA	BB	BB	BB	BB	BB	AA	AA	AA	AA	BB	BB	BB	BB	AA	BB	AA	AA	BB	BB	BB	BB	BB	BB	-	BB	AA	AA	-	AA	BB	-
1_5371237	1	17.89876371	-	-	-	-	-	-	-	-	-	-	-	-	-	-	-	-	-	-	-	-	-	-	-	-	-	-	-	-	-	-	-	-	-	-	-	-	-	-	-	-	-	-	-	-	-	-	-
1_5384612	1	17.89876376	BB	AA	AA	BB	BB	BB	AA	AA	BB	BB	BB	AA	BB	BB	AA	AA	BB	BB	BB	BB	BB	AA	AA	AA	AA	BB	BB	BB	BB	AA	BB	AA	AA	BB	BB	BB	BB	BB	BB	-	BB	AA	AA	-	AA	BB	-
1_5388590	1	17.89876381	BB	AA	AA	BB	BB	BB	AA	AA	BB	BB	BB	AA	BB	BB	AA	AA	BB	BB	BB	BB	BB	AA	AA	AA	AA	BB	BB	BB	BB	AA	BB	AA	AA	BB	BB	BB	BB	BB	BB	-	BB	AA	AA	-	AA	BB	-
1_5391275	1	17.89876386	BB	AA	AA	BB	BB	BB	AA	AA	BB	BB	BB	AA	BB	BB	AA	AA	BB	BB	BB	BB	BB	AA	AA	AA	AA	BB	BB	BB	BB	AA	BB	AA	AA	BB	BB	BB	BB	BB	BB	-	BB	AA	AA	-	AA	BB	-
1_5397074	1	17.89876391	BB	AA	AA	BB	BB	BB	AA	AA	BB	BB	BB	AA	BB	BB	AA	AA	BB	BB	BB	BB	BB	AA	AA	AA	AA	BB	BB	BB	BB	AA	BB	AA	AA	BB	BB	BB	BB	BB	BB	-	BB	AA	AA	-	AA	BB	-
1_5404858	1	17.89876396	BB	AA	AA	BB	BB	BB	AA	AA	BB	BB	BB	AA	BB	BB	AA	AA	BB	BB	BB	BB	BB	AA	AA	AA	AA	BB	BB	BB	BB	AA	BB	AA	AA	BB	BB	BB	BB	BB	BB	-	BB	AA	AA	-	AA	BB	-
1_5410797	1	18.58396753	-	-	-	-	-	-	-	-	-	-	-	-	-	-	-	-	-	-	-	-	-	-	-	-	-	-	-	-	-	-	-	-	-	-	-	-	-	-	-	-	-	-	-	-	-	-	-
1_5421597	1	18.58396758	BB	AA	AA	-	BB	BB	AA	AA	BB	BB	BB	AA	BB	BB	AA	AA	BB	BB	BB	BB	BB	AA	AA	AA	AA	BB	BB	BB	BB	AA	BB	AA	AA	BB	BB	BB	BB	BB	BB	BB	BB	AA	AA	-	AA	BB	-
1_5421942	1	18.58396763	BB	AA	AA	-	BB	BB	AA	AA	BB	BB	BB	AA	BB	BB	AA	AA	BB	BB	BB	BB	BB	AA	AA	AA	AA	BB	BB	BB	BB	AA	BB	AA	AA	BB	BB	BB	BB	BB	BB	BB	BB	AA	AA	-	AA	BB	-
1_5428926	1	18.58396768	-	-	-	-	-	-	-	-	-	-	-	-	-	-	-	-	-	-	-	-	-	-	-	-	-	-	-	-	-	-	-	-	-	-	-	-	-	-	-	-	-	-	-	-	-	-	-
1_5456672	1	18.58396773	BB	AA	AA	-	BB	BB	AA	AA	BB	BB	BB	AA	BB	BB	AA	AA	BB	BB	BB	BB	BB	AA	AA	AA	AA	BB	BB	BB	BB	AA	BB	AA	AA	BB	BB	BB	BB	BB	BB	BB	BB	AA	AA	-	AA	BB	-
1_5461312	1	18.58396778	BB	AA	AA	-	BB	BB	AA	AA	BB	BB	BB	AA	BB	BB	AA	AA	BB	BB	BB	BB	BB	AA	AA	AA	AA	BB	BB	BB	BB	AA	BB	AA	AA	BB	BB	BB	BB	BB	BB	BB	BB	AA	AA	-	AA	BB	-
1_5463298	1	18.58396783	-	-	-	-	-	-	-	-	-	-	-	-	-	-	-	-	-	-	-	-	-	-	-	-	-	-	-	-	-	-	-	-	-	-	-	-	-	-	-	-	-	-	-	-	-	-	-
1_5464368	1	18.58396788	BB	AA	AA	-	BB	BB	AA	AA	BB	BB	BB	AA	BB	BB	AA	AA	BB	BB	BB	BB	BB	AA	AA	AA	AA	BB	BB	BB	BB	AA	BB	AA	AA	BB	BB	BB	BB	BB	BB	BB	BB	AA	AA	-	AA	BB	-
1_5465261	1	18.58396793	BB	AA	AA	-	BB	BB	AA	AA	BB	BB	BB	AA	BB	BB	AA	AA	BB	BB	BB	BB	BB	AA	AA	AA	AA	BB	BB	BB	BB	AA	BB	AA	AA	BB	BB	BB	BB	BB	BB	BB	BB	AA	AA	-	AA	BB	-
1_5468316	1	18.58396798	BB	AA	AA	-	BB	BB	AA	AA	BB	BB	BB	AA	BB	BB	AA	AA	BB	BB	BB	BB	BB	AA	AA	AA	AA	BB	BB	BB	BB	AA	BB	AA	AA	BB	BB	BB	BB	BB	BB	BB	BB	AA	AA	-	AA	BB	-
1_5485783	1	18.58396803	BB	AA	AA	-	BB	BB	AA	AA	BB	BB	BB	AA	BB	BB	AA	AA	BB	BB	BB	BB	BB	AA	AA	AA	AA	BB	BB	BB	BB	AA	BB	AA	AA	BB	BB	BB	BB	BB	BB	BB	BB	AA	AA	-	AA	BB	-
1_5485862	1	18.58396808	BB	AA	AA	-	BB	BB	AA	AA	BB	BB	BB	AA	BB	BB	AA	AA	BB	BB	BB	BB	BB	AA	AA	AA	AA	BB	BB	BB	BB	AA	BB	AA	AA	BB	BB	BB	BB	BB	BB	BB	BB	AA	AA	-	AA	BB	-
1_5508567	1	18.58396813	BB	AA	AA	-	BB	BB	AA	AA	BB	BB	BB	AA	BB	BB	AA	AA	BB	BB	BB	BB	BB	AA	AA	AA	AA	BB	BB	BB	BB	AA	BB	AA	AA	BB	BB	BB	BB	BB	BB	BB	BB	AA	AA	-	AA	BB	-
1_5521110	1	18.58396818	BB	AA	AA	-	BB	BB	AA	AA	BB	BB	BB	AA	BB	BB	AA	AA	BB	BB	BB	BB	BB	AA	AA	AA	AA	BB	BB	BB	BB	AA	BB	AA	AA	BB	BB	BB	BB	BB	BB	BB	BB	AA	AA	-	AA	BB	-
1_5558655	1	18.58396823	BB	AA	AA	-	BB	BB	AA	AA	BB	BB	BB	AA	BB	BB	AA	AA	BB	BB	BB	BB	BB	AA	AA	AA	AA	BB	BB	BB	BB	AA	BB	AA	AA	BB	BB	BB	BB	BB	BB	BB	BB	AA	AA	-	AA	BB	-
1_5599853	1	19.14672471	BB	AA	AA	AA	BB	BB	AA	AA	BB	BB	BB	AA	BB	BB	AA	AA	BB	BB	BB	BB	BB	AA	AA	AA	AA	BB	BB	BB	BB	AA	BB	AA	AA	BB	BB	BB	BB	BB	BB	BB	BB	AA	AA	-	AA	BB	-
1_5612286	1	19.14672476	BB	AA	AA	AA	BB	BB	AA	AA	BB	BB	BB	AA	BB	BB	AA	AA	BB	BB	BB	BB	BB	AA	AA	AA	AA	BB	BB	BB	BB	AA	BB	AA	AA	BB	BB	BB	BB	BB	BB	BB	BB	AA	AA	-	AA	BB	-
1_5613602	1	19.14672481	BB	AA	AA	AA	BB	BB	AA	AA	BB	BB	BB	AA	BB	BB	AA	AA	BB	BB	BB	BB	BB	AA	AA	AA	AA	BB	BB	BB	BB	AA	BB	AA	AA	BB	BB	BB	BB	BB	BB	BB	BB	AA	AA	-	AA	BB	-
1_5621846	1	19.14672486	BB	AA	AA	AA	BB	BB	AA	AA	BB	BB	BB	AA	BB	BB	AA	AA	BB	BB	BB	BB	BB	AA	AA	AA	AA	BB	BB	BB	BB	AA	BB	AA	AA	BB	BB	BB	BB	BB	BB	BB	BB	AA	AA	-	AA	BB	-
1_5625335	1	19.14672491	BB	AA	AA	AA	BB	BB	AA	AA	BB	BB	BB	AA	BB	BB	AA	AA	BB	BB	BB	BB	BB	AA	AA	AA	AA	BB	BB	BB	BB	AA	BB	AA	AA	BB	BB	BB	BB	BB	BB	BB	BB	AA	AA	-	AA	BB	-
1_5639760	1	19.14672496	BB	AA	AA	AA	BB	BB	AA	AA	BB	BB	BB	AA	BB	BB	AA	AA	BB	BB	BB	BB	BB	AA	AA	AA	AA	BB	BB	BB	BB	AA	BB	AA	AA	BB	BB	BB	BB	BB	BB	BB	BB	AA	AA	-	AA	BB	-
1_5696129	1	19.60069335	BB	AA	AA	AA	BB	BB	AA	AA	BB	BB	BB	AA	BB	BB	AA	AA	BB	BB	BB	BB	BB	AA	AA	AA	AA	BB	BB	BB	BB	AA	BB	AA	AA	BB	BB	BB	BB	BB	BB	BB	BB	AA	AA	-	AA	BB	-
1_5696297	1	19.6006934	BB	AA	AA	AA	BB	BB	AA	AA	BB	BB	BB	AA	BB	BB	AA	AA	BB	BB	BB	BB	BB	AA	AA	AA	AA	BB	BB	BB	BB	AA	BB	AA	AA	BB	BB	BB	BB	BB	BB	BB	BB	AA	AA	-	AA	BB	-
1_5714148	1	19.60069345	BB	AA	AA	AA	BB	BB	AA	AA	BB	BB	BB	AA	BB	BB	AA	AA	BB	BB	BB	BB	BB	AA	AA	AA	AA	BB	BB	BB	BB	AA	BB	AA	AA	BB	BB	BB	BB	BB	BB	BB	BB	AA	AA	-	AA	BB	-
1_5743853	1	19.6006935	BB	AA	AA	AA	BB	BB	AA	AA	BB	BB	BB	AA	BB	BB	AA	AA	BB	BB	BB	BB	BB	AA	AA	AA	AA	BB	BB	BB	BB	AA	BB	AA	AA	BB	BB	BB	BB	BB	BB	BB	BB	AA	AA	-	AA	BB	-
1_5743921	1	19.60069355	BB	AA	AA	AA	BB	BB	AA	AA	BB	BB	BB	AA	BB	BB	AA	AA	BB	BB	BB	BB	BB	AA	AA	AA	AA	BB	BB	BB	BB	AA	BB	AA	AA	BB	BB	BB	BB	BB	BB	BB	BB	AA	AA	-	AA	BB	-
1_5744719	1	19.6006936	BB	AA	AA	AA	BB	BB	AA	AA	BB	BB	BB	AA	BB	BB	AA	AA	BB	BB	BB	BB	BB	AA	AA	AA	AA	BB	BB	BB	BB	AA	BB	AA	AA	BB	BB	BB	BB	BB	BB	BB	BB	AA	AA	-	AA	BB	-
1_5753933	1	19.60069365	-	-	-	-	-	-	-	-	-	-	-	-	-	-	-	-	-	-	-	-	-	-	-	-	-	-	-	-	-	-	-	-	-	-	-	-	-	-	-	-	-	-	-	-	-	-	-
1_5848946	1	19.6006937	BB	AA	AA	AA	BB	BB	AA	AA	BB	BB	BB	AA	BB	BB	AA	AA	BB	BB	BB	BB	BB	AA	AA	AA	AA	BB	BB	BB	BB	AA	BB	AA	AA	BB	BB	BB	BB	BB	BB	BB	BB	AA	AA	-	AA	BB	-
1_5853037	1	19.60069375	BB	AA	AA	AA	BB	BB	AA	AA	BB	BB	BB	AA	BB	BB	AA	AA	BB	BB	BB	BB	BB	AA	AA	AA	AA	BB	BB	BB	BB	AA	BB	AA	AA	BB	BB	BB	BB	BB	BB	BB	BB	AA	AA	-	AA	BB	-
1_5869978	1	19.6006938	BB	AA	AA	AA	BB	BB	AA	AA	BB	BB	BB	AA	BB	BB	AA	AA	BB	BB	BB	BB	BB	AA	AA	AA	AA	BB	BB	BB	BB	AA	BB	AA	AA	BB	BB	BB	BB	BB	BB	BB	BB	AA	AA	-	AA	BB	-
1_5876817	1	19.60069385	BB	AA	AA	AA	BB	BB	AA	AA	BB	BB	BB	AA	BB	BB	AA	AA	BB	BB	BB	BB	BB	AA	AA	AA	AA	BB	BB	BB	BB	AA	BB	AA	AA	BB	BB	BB	BB	BB	BB	BB	BB	AA	AA	-	AA	BB	-
1_5913083	1	19.6006939	BB	AA	AA	AA	BB	BB	AA	AA	BB	BB	BB	AA	BB	BB	AA	AA	BB	BB	BB	BB	BB	AA	AA	AA	AA	BB	BB	BB	BB	AA	BB	AA	AA	BB	BB	BB	BB	BB	BB	BB	BB	AA	AA	-	AA	BB	-
1_5916145	1	19.60069395	BB	AA	AA	AA	BB	BB	AA	AA	BB	BB	BB	AA	BB	BB	AA	AA	BB	BB	BB	BB	BB	AA	AA	AA	AA	BB	BB	BB	BB	AA	BB	AA	AA	BB	BB	BB	BB	BB	BB	BB	BB	AA	AA	-	AA	BB	-
1_5931375	1	19.600694	BB	AA	AA	AA	BB	BB	AA	AA	BB	BB	BB	AA	BB	BB	AA	AA	BB	BB	BB	BB	BB	AA	AA	AA	AA	BB	BB	BB	BB	AA	BB	AA	AA	BB	BB	BB	BB	BB	BB	BB	BB	AA	AA	-	AA	BB	-
1_5934953	1	19.60069405	BB	AA	AA	AA	BB	BB	AA	AA	BB	BB	BB	AA	BB	BB	AA	AA	BB	BB	BB	BB	BB	AA	AA	AA	AA	BB	BB	BB	BB	AA	BB	AA	AA	BB	BB	BB	BB	BB	BB	BB	BB	AA	AA	-	AA	BB	-
1_5938876	1	19.6006941	BB	AA	AA	AA	BB	BB	AA	AA	BB	BB	BB	AA	BB	BB	AA	AA	BB	BB	BB	BB	BB	AA	AA	AA	AA	BB	BB	BB	BB	AA	BB	AA	AA	BB	BB	BB	BB	BB	BB	BB	BB	AA	AA	-	AA	BB	-
1_5949972	1	19.60069415	BB	AA	AA	AA	BB	BB	AA	AA	BB	BB	BB	AA	BB	BB	AA	AA	BB	BB	BB	BB	BB	AA	AA	AA	AA	BB	BB	BB	BB	AA	BB	AA	AA	BB	BB	BB	BB	BB	BB	BB	BB	AA	AA	-	AA	BB	-
1_5986966	1	19.6006942	BB	AA	AA	AA	BB	BB	AA	AA	BB	BB	BB	AA	BB	BB	AA	AA	BB	BB	BB	BB	BB	AA	AA	AA	AA	BB	BB	BB	BB	AA	BB	AA	AA	BB	BB	BB	BB	BB	BB	BB	BB	AA	AA	-	AA	BB	-
1_6006468	1	19.60069425	BB	AA	AA	AA	BB	BB	AA	AA	BB	BB	BB	AA	BB	BB	AA	AA	BB	BB	BB	BB	BB	AA	AA	AA	AA	BB	BB	BB	BB	AA	BB	AA	AA	BB	BB	BB	BB	BB	BB	BB	BB	AA	AA	-	AA	BB	-
1_6009753	1	19.6006943	BB	AA	AA	AA	BB	BB	AA	AA	BB	BB	BB	AA	BB	BB	AA	AA	BB	BB	BB	BB	BB	AA	AA	AA	AA	BB	BB	BB	BB	AA	BB	AA	AA	BB	BB	BB	BB	BB	BB	BB	BB	AA	AA	-	AA	BB	-
1_6012425	1	19.60069435	BB	AA	AA	AA	BB	BB	AA	AA	BB	BB	BB	AA	BB	BB	AA	AA	BB	BB	BB	BB	BB	AA	AA	AA	AA	BB	BB	BB	BB	AA	BB	AA	AA	BB	BB	BB	BB	BB	BB	BB	BB	AA	AA	-	AA	BB	-
1_6013190	1	19.6006944	BB	AA	AA	AA	BB	BB	AA	AA	BB	BB	BB	AA	BB	BB	AA	AA	BB	BB	BB	BB	BB	AA	AA	AA	AA	BB	BB	BB	BB	AA	BB	AA	AA	BB	BB	BB	BB	BB	BB	BB	BB	AA	AA	-	AA	BB	-
1_6088339	1	19.60069445	BB	AA	AA	AA	BB	BB	AA	AA	BB	BB	BB	AA	BB	BB	AA	AA	BB	BB	BB	BB	BB	AA	AA	AA	AA	BB	BB	BB	BB	AA	BB	AA	AA	BB	BB	BB	BB	BB	BB	BB	BB	AA	AA	-	AA	BB	-
1_6105011	1	19.6006945	BB	AA	AA	AA	BB	BB	AA	AA	BB	BB	BB	AA	BB	BB	AA	AA	BB	BB	BB	BB	BB	AA	AA	AA	AA	BB	BB	BB	BB	AA	BB	AA	AA	BB	BB	BB	BB	BB	BB	BB	BB	AA	AA	-	AA	BB	-
1_6154584	1	19.60069455	BB	AA	AA	AA	BB	BB	AA	AA	BB	BB	BB	AA	BB	BB	AA	AA	BB	BB	BB	BB	BB	AA	AA	AA	AA	BB	BB	BB	BB	AA	BB	AA	AA	BB	BB	BB	BB	BB	BB	BB	BB	AA	AA	-	AA	BB	-
1_6155567	1	19.88061015	BB	AA	AA	AA	BB	BB	AA	AA	BB	BB	BB	AA	BB	BB	AA	AA	BB	BB	BB	BB	BB	AA	AA	AA	AA	BB	BB	BB	BB	AA	BB	AA	AA	BB	BB	BB	BB	BB	BB	BB	BB	AA	AA	-	AA	BB	-
1_6155717	1	19.8806102	BB	AA	AA	AA	BB	BB	AA	AA	BB	BB	BB	AA	BB	BB	AA	AA	BB	BB	BB	BB	BB	AA	AA	AA	AA	BB	BB	BB	BB	AA	BB	AA	AA	BB	BB	BB	BB	BB	BB	BB	BB	AA	AA	-	AA	BB	-
1_6162397	1	19.88061025	BB	AA	AA	AA	BB	BB	AA	AA	BB	BB	BB	AA	BB	BB	AA	AA	BB	BB	BB	BB	BB	AA	AA	AA	AA	BB	BB	BB	BB	AA	BB	AA	AA	BB	BB	BB	BB	BB	BB	BB	BB	AA	AA	-	AA	BB	-
1_6211647	1	19.8806103	BB	AA	AA	AA	BB	BB	AA	AA	BB	BB	BB	AA	BB	BB	AA	AA	BB	BB	BB	BB	BB	AA	AA	AA	AA	BB	BB	BB	BB	AA	BB	AA	AA	BB	BB	BB	BB	BB	BB	BB	BB	AA	AA	-	AA	BB	-
1_6243642	1	19.88061035	-	-	-	-	-	-	-	-	-	-	-	-	-	-	-	-	-	-	-	-	-	-	-	-	-	-	-	-	-	-	-	-	-	-	-	-	-	-	-	-	-	-	-	-	-	-	-
1_6245889	1	19.8806104	BB	AA	AA	AA	BB	BB	AA	AA	BB	BB	BB	AA	BB	BB	AA	AA	BB	BB	BB	BB	BB	AA	AA	AA	AA	BB	BB	BB	BB	AA	BB	AA	AA	BB	BB	BB	BB	BB	BB	BB	BB	AA	AA	-	AA	BB	-
1_6246002	1	19.88061045	BB	AA	AA	AA	BB	BB	AA	AA	BB	BB	BB	AA	BB	BB	AA	AA	BB	BB	BB	BB	BB	AA	AA	AA	AA	BB	BB	BB	BB	AA	BB	AA	AA	BB	BB	BB	BB	BB	BB	BB	BB	AA	AA	-	AA	BB	-
1_6259244	1	19.8806105	BB	AA	AA	AA	BB	BB	AA	AA	BB	BB	BB	AA	BB	BB	AA	AA	BB	BB	BB	BB	BB	AA	AA	AA	AA	BB	BB	BB	BB	AA	BB	AA	AA	BB	BB	BB	BB	BB	BB	BB	BB	AA	AA	-	AA	BB	-
1_6278562	1	20.37097596	BB	AA	AA	AA	BB	BB	AA	AA	BB	BB	BB	AA	BB	BB	AA	AA	BB	BB	BB	BB	BB	AA	AA	AA	AA	BB	BB	BB	BB	AA	BB	AA	AA	BB	BB	BB	BB	BB	BB	BB	BB	AA	AA	-	AA	BB	-
1_6303619	1	20.37097601	BB	AA	AA	AA	BB	BB	AA	AA	BB	BB	BB	AA	BB	BB	AA	AA	BB	BB	BB	BB	BB	AA	AA	AA	AA	BB	BB	BB	BB	AA	BB	AA	AA	BB	BB	BB	BB	BB	BB	BB	BB	AA	AA	-	AA	BB	-
1_6326988	1	20.37097606	BB	AA	AA	AA	BB	BB	AA	AA	BB	BB	BB	AA	BB	BB	AA	AA	BB	BB	BB	BB	BB	AA	AA	AA	AA	BB	BB	BB	BB	AA	BB	AA	AA	BB	BB	BB	BB	BB	BB	BB	BB	AA	AA	-	AA	BB	-
1_6330281	1	20.37097611	-	-	-	-	-	-	-	-	-	-	-	-	-	-	-	-	-	-	-	-	-	-	-	-	-	-	-	-	-	-	-	-	-	-	-	-	-	-	-	-	-	-	-	-	-	-	-
1_6353900	1	20.37097616	BB	AA	AA	AA	BB	BB	AA	AA	BB	BB	BB	AA	BB	BB	AA	AA	BB	BB	BB	BB	BB	AA	AA	AA	AA	BB	BB	BB	BB	AA	BB	AA	AA	BB	BB	BB	BB	BB	BB	BB	BB	AA	AA	-	AA	BB	-
1_6365704	1	20.37097621	BB	AA	AA	AA	BB	BB	AA	AA	BB	BB	BB	AA	BB	BB	AA	AA	BB	BB	BB	BB	BB	AA	AA	AA	AA	BB	BB	BB	BB	AA	BB	AA	AA	BB	BB	BB	BB	BB	BB	BB	BB	AA	AA	-	AA	BB	-
1_6378339	1	20.37097626	-	-	-	-	-	-	-	-	-	-	-	-	-	-	-	-	-	-	-	-	-	-	-	-	-	-	-	-	-	-	-	-	-	-	-	-	-	-	-	-	-	-	-	-	-	-	-
1_6380792	1	20.37097631	BB	AA	AA	AA	BB	BB	AA	AA	BB	BB	BB	AA	BB	BB	AA	AA	BB	BB	BB	BB	BB	AA	AA	AA	AA	BB	BB	BB	BB	AA	BB	AA	AA	BB	BB	BB	BB	BB	BB	BB	BB	AA	AA	-	AA	BB	-
1_6439158	1	20.37097636	BB	AA	AA	AA	BB	BB	AA	AA	BB	BB	BB	AA	BB	BB	AA	AA	BB	BB	BB	BB	BB	AA	AA	AA	AA	BB	BB	BB	BB	AA	BB	AA	AA	BB	BB	BB	BB	BB	BB	BB	BB	AA	AA	-	AA	BB	-
1_6452315	1	20.37097641	BB	AA	AA	AA	BB	BB	AA	AA	BB	BB	BB	AA	BB	BB	AA	AA	BB	BB	BB	BB	BB	AA	AA	AA	AA	BB	BB	BB	BB	AA	BB	AA	AA	BB	BB	BB	BB	BB	BB	BB	BB	AA	AA	-	AA	BB	-
1_6453788	1	20.37097646	-	-	-	-	-	-	-	-	-	-	-	-	-	-	-	-	-	-	-	-	-	-	-	-	-	-	-	-	-	-	-	-	-	-	-	-	-	-	-	-	-	-	-	-	-	-	-
1_6461329	1	20.70114133	BB	AA	AA	AA	BB	BB	AA	AA	BB	BB	BB	AA	BB	BB	AA	AA	BB	BB	BB	BB	BB	AA	AA	AA	AA	BB	BB	BB	BB	AA	BB	AA	AA	BB	BB	BB	BB	BB	BB	BB	BB	AA	AA	-	AA	BB	-
1_6474328	1	20.70114138	BB	AA	AA	AA	BB	BB	AA	AA	BB	BB	BB	AA	BB	BB	AA	AA	BB	BB	BB	BB	BB	AA	AA	AA	AA	BB	BB	BB	BB	AA	BB	AA	AA	BB	BB	BB	BB	BB	BB	BB	BB	AA	AA	-	AA	BB	-
1_6489603	1	20.70114143	BB	AA	AA	AA	BB	BB	AA	AA	BB	BB	BB	AA	BB	BB	AA	AA	BB	BB	BB	BB	BB	AA	AA	AA	AA	BB	BB	BB	BB	AA	BB	AA	AA	BB	BB	BB	BB	BB	BB	BB	BB	AA	AA	-	AA	BB	-
1_6493815	1	20.70114148	BB	AA	AA	AA	BB	BB	AA	AA	BB	BB	BB	AA	BB	BB	AA	AA	BB	BB	BB	BB	BB	AA	AA	AA	AA	BB	BB	BB	BB	AA	BB	AA	AA	BB	BB	BB	BB	BB	BB	BB	BB	AA	AA	-	AA	BB	-
1_6499434	1	20.70114153	BB	AA	AA	AA	BB	BB	AA	AA	BB	BB	BB	AA	BB	BB	AA	AA	BB	BB	BB	BB	BB	AA	AA	AA	AA	BB	BB	BB	BB	AA	BB	AA	AA	BB	BB	BB	BB	BB	BB	BB	BB	AA	AA	-	AA	BB	-
1_6509612	1	20.70114158	BB	AA	AA	AA	BB	BB	AA	AA	BB	BB	BB	AA	BB	BB	AA	AA	BB	BB	BB	BB	BB	AA	AA	AA	AA	BB	BB	BB	BB	AA	BB	AA	AA	BB	BB	BB	BB	BB	BB	BB	BB	AA	AA	-	AA	BB	-
1_6513794	1	20.70114163	BB	AA	AA	AA	BB	BB	AA	AA	BB	BB	BB	AA	BB	BB	AA	AA	BB	BB	BB	BB	BB	AA	AA	AA	AA	BB	BB	BB	BB	AA	BB	AA	AA	BB	BB	BB	BB	BB	BB	BB	BB	AA	AA	-	AA	BB	-
1_6536921	1	21.29203592	BB	AA	AA	AA	BB	BB	AA	AA	BB	BB	BB	AA	BB	BB	AA	AA	BB	BB	BB	BB	BB	AA	AA	AA	AA	BB	BB	BB	BB	AA	BB	AA	AA	BB	BB	BB	BB	BB	BB	BB	BB	AA	AA	-	AA	BB	-
1_6625801	1	21.37341229	BB	AA	AA	AA	BB	BB	AA	AA	BB	BB	BB	AA	BB	BB	AA	AA	BB	BB	BB	BB	BB	AA	AA	AA	AA	BB	BB	BB	BB	AA	-	AA	AA	-	BB	BB	BB	BB	BB	BB	BB	AA	AA	-	AA	BB	-
1_6632320	1	21.37341234	BB	AA	AA	AA	BB	BB	AA	AA	BB	BB	BB	AA	BB	BB	AA	AA	BB	BB	BB	BB	BB	AA	AA	AA	AA	BB	BB	BB	BB	AA	-	AA	AA	-	BB	BB	BB	BB	BB	BB	BB	AA	AA	-	AA	BB	-
1_6633896	1	21.37341239	BB	AA	AA	AA	BB	BB	AA	AA	BB	BB	BB	AA	BB	BB	AA	AA	BB	BB	BB	BB	BB	AA	AA	AA	AA	BB	BB	BB	BB	AA	-	AA	AA	-	BB	BB	BB	BB	BB	BB	BB	AA	AA	-	AA	BB	-
1_6642423	1	21.37341244	BB	AA	AA	AA	BB	BB	AA	AA	BB	BB	BB	AA	BB	BB	AA	AA	BB	BB	BB	BB	BB	AA	AA	AA	AA	BB	BB	BB	BB	AA	-	AA	AA	-	BB	BB	BB	BB	BB	BB	BB	AA	AA	-	AA	BB	-
1_6649649	1	21.37341249	BB	AA	AA	AA	BB	BB	AA	AA	BB	BB	BB	AA	BB	BB	AA	AA	BB	BB	BB	BB	BB	AA	AA	AA	AA	BB	BB	BB	BB	AA	-	AA	AA	-	BB	BB	BB	BB	BB	BB	BB	AA	AA	-	AA	BB	-
1_6668825	1	21.7555199	BB	AA	AA	AA	BB	BB	AA	AA	BB	BB	BB	AA	BB	BB	AA	AA	BB	BB	BB	BB	BB	AA	AA	AA	AA	BB	BB	BB	BB	AA	-	AA	AA	-	BB	BB	BB	BB	BB	BB	BB	AA	AA	-	AA	BB	-
1_6717507	1	21.75551995	BB	AA	AA	AA	BB	BB	AA	AA	BB	BB	BB	AA	BB	BB	AA	AA	BB	BB	BB	BB	BB	AA	AA	AA	AA	BB	BB	BB	BB	AA	-	AA	AA	-	BB	BB	BB	BB	BB	BB	BB	AA	AA	-	AA	BB	-
1_6792945	1	21.75552	BB	AA	AA	AA	BB	BB	AA	AA	BB	BB	BB	AA	BB	BB	AA	AA	BB	BB	BB	BB	BB	AA	AA	AA	AA	BB	BB	BB	BB	AA	-	AA	AA	-	BB	BB	BB	BB	BB	BB	BB	AA	AA	-	AA	BB	-
1_6860609	1	21.75552005	BB	AA	AA	AA	BB	BB	AA	AA	BB	BB	BB	AA	BB	BB	AA	AA	BB	BB	BB	BB	BB	AA	AA	AA	AA	BB	BB	BB	BB	AA	-	AA	AA	-	BB	BB	BB	BB	BB	BB	BB	AA	AA	-	AA	BB	-
1_6862714	1	21.7555201	BB	AA	AA	AA	BB	BB	AA	AA	BB	BB	BB	AA	BB	BB	AA	AA	BB	BB	BB	BB	BB	AA	AA	AA	AA	BB	BB	BB	BB	AA	-	AA	AA	-	BB	BB	BB	BB	BB	BB	BB	AA	AA	-	AA	BB	-
1_6870447	1	21.75552015	BB	AA	AA	AA	BB	BB	AA	AA	BB	BB	BB	AA	BB	BB	AA	AA	BB	BB	BB	BB	BB	AA	AA	AA	AA	BB	BB	BB	BB	AA	-	AA	AA	-	BB	BB	BB	BB	BB	BB	BB	AA	AA	-	AA	BB	-
1_6872980	1	21.7555202	BB	AA	AA	AA	BB	BB	AA	AA	BB	BB	BB	AA	BB	BB	AA	AA	BB	BB	BB	BB	BB	AA	AA	AA	AA	BB	BB	BB	BB	AA	-	AA	AA	-	BB	BB	BB	BB	BB	BB	BB	AA	AA	-	AA	BB	-
1_6874419	1	22.81302142	BB	AA	-	AA	BB	BB	AA	AA	BB	BB	BB	AA	BB	BB	AA	AA	BB	BB	BB	BB	BB	AA	AA	-	AA	BB	BB	BB	BB	AA	-	AA	AA	-	BB	BB	BB	BB	BB	BB	BB	AA	AA	-	AA	BB	-
1_6874501	1	22.81302147	BB	AA	-	AA	BB	BB	AA	AA	BB	BB	BB	AA	BB	BB	AA	AA	BB	BB	BB	BB	BB	AA	AA	-	AA	BB	BB	BB	BB	AA	-	AA	AA	-	BB	BB	BB	BB	BB	BB	BB	AA	AA	-	AA	BB	-
1_6909432	1	22.81302152	BB	AA	-	AA	BB	BB	AA	AA	BB	BB	BB	AA	BB	BB	AA	AA	BB	BB	BB	BB	BB	AA	AA	-	AA	BB	BB	BB	BB	AA	-	AA	AA	-	BB	BB	BB	BB	BB	BB	BB	AA	AA	-	AA	BB	-
1_6913259	1	22.81302157	-	-	-	-	-	-	-	-	-	-	-	-	-	-	-	-	-	-	-	-	-	-	-	-	-	-	-	-	-	-	-	-	-	-	-	-	-	-	-	-	-	-	-	-	-	-	-
1_6920855	1	22.81302162	BB	AA	-	AA	BB	BB	AA	AA	BB	BB	BB	AA	BB	BB	AA	AA	BB	BB	BB	BB	BB	AA	AA	-	AA	BB	BB	BB	BB	AA	-	AA	AA	-	BB	BB	BB	BB	BB	BB	BB	AA	AA	-	AA	BB	-
1_6951743	1	22.81302167	BB	AA	-	AA	BB	BB	AA	AA	BB	BB	BB	AA	BB	BB	AA	AA	BB	BB	BB	BB	BB	AA	AA	-	AA	BB	BB	BB	BB	AA	-	AA	AA	-	BB	BB	BB	BB	BB	BB	BB	AA	AA	-	AA	BB	-
1_6981426	1	22.81302172	-	-	-	-	-	-	-	-	-	-	-	-	-	-	-	-	-	-	-	-	-	-	-	-	-	-	-	-	-	-	-	-	-	-	-	-	-	-	-	-	-	-	-	-	-	-	-
1_6987772	1	22.81302177	BB	AA	-	AA	BB	BB	AA	AA	BB	BB	BB	AA	BB	BB	AA	AA	BB	BB	BB	BB	BB	AA	AA	-	AA	BB	BB	BB	BB	AA	-	AA	AA	-	BB	BB	BB	BB	BB	BB	BB	AA	AA	-	AA	BB	-
1_7003096	1	22.81302182	BB	AA	-	AA	BB	BB	AA	AA	BB	BB	BB	AA	BB	BB	AA	AA	BB	BB	BB	BB	BB	AA	AA	-	AA	BB	BB	BB	BB	AA	-	AA	AA	-	BB	BB	BB	BB	BB	BB	BB	AA	AA	-	AA	BB	-
1_7006527	1	22.81302187	BB	AA	-	AA	BB	BB	AA	AA	BB	BB	BB	AA	BB	BB	AA	AA	BB	BB	BB	BB	BB	AA	AA	-	AA	BB	BB	BB	BB	AA	-	AA	AA	-	BB	BB	BB	BB	BB	BB	BB	AA	AA	-	AA	BB	-
1_7012908	1	22.81302192	BB	AA	-	AA	BB	BB	AA	AA	BB	BB	BB	AA	BB	BB	AA	AA	BB	BB	BB	BB	BB	AA	AA	-	AA	BB	BB	BB	BB	AA	-	AA	AA	-	BB	BB	BB	BB	BB	BB	BB	AA	AA	-	AA	BB	-
1_7028435	1	22.81302197	BB	AA	-	AA	BB	BB	AA	AA	BB	BB	BB	AA	BB	BB	AA	AA	BB	BB	BB	BB	BB	AA	AA	-	AA	BB	BB	BB	BB	AA	-	AA	AA	-	BB	BB	BB	BB	BB	BB	BB	AA	AA	-	AA	BB	-
1_7029310	1	22.81302202	-	-	-	-	-	-	-	-	-	-	-	-	-	-	-	-	-	-	-	-	-	-	-	-	-	-	-	-	-	-	-	-	-	-	-	-	-	-	-	-	-	-	-	-	-	-	-
1_7034947	1	22.81302207	-	-	-	-	-	-	-	-	-	-	-	-	-	-	-	-	-	-	-	-	-	-	-	-	-	-	-	-	-	-	-	-	-	-	-	-	-	-	-	-	-	-	-	-	-	-	-
1_7046388	1	22.81302212	-	-	-	-	-	-	-	-	-	-	-	-	-	-	-	-	-	-	-	-	-	-	-	-	-	-	-	-	-	-	-	-	-	-	-	-	-	-	-	-	-	-	-	-	-	-	-
1_7049020	1	22.81302217	BB	AA	-	AA	BB	BB	AA	AA	BB	BB	BB	AA	BB	BB	AA	AA	BB	BB	BB	BB	BB	AA	AA	-	AA	BB	BB	BB	BB	AA	-	AA	AA	-	BB	BB	BB	BB	BB	BB	BB	AA	AA	-	AA	BB	-
1_7064973	1	22.81302222	BB	AA	-	AA	BB	BB	AA	AA	BB	BB	BB	AA	BB	BB	AA	AA	BB	BB	BB	BB	BB	AA	AA	-	AA	BB	BB	BB	BB	AA	-	AA	AA	-	BB	BB	BB	BB	BB	BB	BB	AA	AA	-	AA	BB	-
1_7067232	1	22.81302227	BB	AA	-	AA	BB	BB	AA	AA	BB	BB	BB	AA	BB	BB	AA	AA	BB	BB	BB	BB	BB	AA	AA	-	AA	BB	BB	BB	BB	AA	-	AA	AA	-	BB	BB	BB	BB	BB	BB	BB	AA	AA	-	AA	BB	-
1_7075898	1	22.81302232	BB	AA	-	AA	BB	BB	AA	AA	BB	BB	BB	AA	BB	BB	AA	AA	BB	BB	BB	BB	BB	AA	AA	-	AA	BB	BB	BB	BB	AA	-	AA	AA	-	BB	BB	BB	BB	BB	BB	BB	AA	AA	-	AA	BB	-
1_7085727	1	22.81302237	BB	AA	-	AA	BB	BB	AA	AA	BB	BB	BB	AA	BB	BB	AA	AA	BB	BB	BB	BB	BB	AA	AA	-	AA	BB	BB	BB	BB	AA	-	AA	AA	-	BB	BB	BB	BB	BB	BB	BB	AA	AA	-	AA	BB	-
1_7089072	1	22.81302242	BB	AA	-	AA	BB	BB	AA	AA	BB	BB	BB	AA	BB	BB	AA	AA	BB	BB	BB	BB	BB	AA	AA	-	AA	BB	BB	BB	BB	AA	-	AA	AA	-	BB	BB	BB	BB	BB	BB	BB	AA	AA	-	AA	BB	-
1_7097459	1	22.81302247	BB	AA	BB	AA	BB	BB	AA	AA	BB	BB	BB	AA	BB	BB	AA	AA	BB	BB	BB	BB	BB	AA	AA	BB	AA	BB	BB	BB	BB	AA	-	AA	AA	-	BB	BB	BB	BB	BB	BB	BB	AA	AA	-	AA	BB	-
1_7097932	1	22.81302252	BB	AA	BB	AA	BB	BB	AA	AA	BB	BB	BB	AA	BB	BB	AA	AA	BB	BB	BB	BB	BB	AA	AA	BB	AA	BB	BB	BB	BB	AA	-	AA	AA	-	BB	BB	BB	BB	BB	BB	BB	AA	AA	-	AA	BB	-
1_7098692	1	22.81302257	BB	AA	BB	AA	BB	BB	AA	AA	BB	BB	BB	AA	BB	BB	AA	AA	BB	BB	BB	BB	BB	AA	AA	BB	AA	BB	BB	BB	BB	AA	-	AA	AA	-	BB	BB	BB	BB	BB	BB	BB	AA	AA	-	AA	BB	-
1_7120572	1	22.81302262	BB	AA	BB	AA	BB	BB	AA	AA	BB	BB	BB	AA	BB	BB	AA	AA	BB	BB	BB	BB	BB	AA	AA	BB	AA	BB	BB	BB	BB	AA	-	AA	AA	-	BB	BB	BB	BB	BB	BB	BB	AA	AA	-	AA	BB	-
1_7145380	1	23.36022467	BB	AA	BB	AA	BB	BB	AA	AA	BB	BB	BB	AA	BB	BB	AA	AA	BB	BB	BB	BB	BB	AA	AA	BB	AA	BB	BB	BB	BB	AA	-	AA	AA	-	BB	BB	BB	BB	BB	BB	BB	AA	AA	-	AA	BB	-
1_7187135	1	23.36022472	BB	AA	BB	AA	BB	BB	AA	AA	BB	BB	BB	AA	BB	BB	AA	AA	BB	BB	BB	BB	BB	AA	AA	BB	AA	BB	BB	BB	BB	AA	-	AA	AA	-	BB	BB	BB	BB	BB	BB	BB	AA	AA	BB	AA	BB	-
1_7189027	1	23.36022477	BB	AA	BB	AA	BB	BB	AA	AA	BB	BB	BB	AA	BB	BB	AA	AA	BB	BB	BB	BB	BB	AA	AA	BB	AA	BB	BB	BB	BB	AA	-	AA	AA	-	BB	BB	BB	BB	BB	BB	BB	AA	AA	BB	AA	BB	-
1_7193571	1	23.36022482	BB	AA	BB	AA	BB	BB	AA	AA	BB	BB	BB	AA	BB	BB	AA	AA	BB	BB	BB	BB	BB	AA	AA	BB	AA	BB	BB	BB	BB	AA	-	AA	AA	-	BB	BB	BB	BB	BB	BB	BB	AA	AA	BB	AA	BB	-
1_7201654	1	23.36022487	BB	AA	BB	AA	BB	BB	AA	AA	BB	BB	BB	AA	BB	BB	AA	AA	BB	BB	BB	BB	BB	AA	AA	BB	AA	BB	BB	BB	BB	AA	-	AA	AA	-	BB	BB	BB	BB	BB	BB	BB	AA	AA	BB	AA	BB	-
1_7239962	1	23.44937095	BB	AA	BB	AA	BB	BB	AA	AA	BB	BB	BB	AA	BB	BB	AA	AA	BB	BB	BB	BB	BB	AA	AA	BB	AA	BB	BB	BB	BB	AA	-	AA	AA	-	BB	BB	BB	BB	BB	BB	BB	AA	AA	BB	AA	BB	-
1_7267199	1	23.449371	BB	AA	BB	AA	BB	BB	AA	AA	BB	BB	BB	AA	BB	BB	AA	AA	BB	BB	BB	BB	BB	AA	AA	BB	AA	BB	BB	BB	BB	AA	-	AA	AA	-	BB	BB	BB	BB	BB	BB	BB	AA	AA	BB	AA	BB	-
1_7290616	1	23.44937105	BB	AA	BB	AA	BB	BB	AA	AA	BB	BB	BB	AA	BB	BB	AA	AA	BB	BB	BB	BB	BB	AA	AA	BB	AA	BB	BB	BB	BB	AA	-	AA	AA	-	BB	BB	BB	BB	BB	BB	BB	AA	AA	BB	AA	BB	-
1_7295932	1	23.4493711	BB	AA	BB	AA	BB	BB	AA	AA	BB	BB	BB	AA	BB	BB	AA	AA	BB	BB	BB	BB	BB	AA	AA	BB	AA	BB	BB	BB	BB	AA	-	AA	AA	-	BB	BB	BB	BB	BB	BB	BB	AA	AA	BB	AA	BB	-
1_7336585	1	23.44937115	BB	AA	BB	AA	BB	BB	AA	AA	BB	BB	BB	AA	BB	BB	AA	AA	BB	BB	BB	BB	BB	AA	AA	BB	AA	BB	BB	BB	BB	AA	-	AA	AA	-	BB	BB	BB	BB	BB	BB	BB	AA	AA	BB	AA	BB	-
1_7340032	1	23.4493712	BB	AA	BB	AA	BB	BB	AA	AA	BB	BB	BB	AA	BB	BB	AA	AA	BB	BB	BB	BB	BB	AA	AA	BB	AA	BB	BB	BB	BB	AA	-	AA	AA	-	BB	BB	BB	BB	BB	BB	BB	AA	AA	BB	AA	BB	-
1_7371512	1	23.44937125	BB	AA	BB	AA	BB	BB	AA	AA	BB	BB	BB	AA	BB	BB	AA	AA	BB	BB	BB	BB	BB	AA	AA	BB	AA	BB	BB	BB	BB	AA	-	AA	AA	-	BB	BB	BB	BB	BB	BB	BB	AA	AA	BB	AA	BB	-
1_7405125	1	23.4493713	-	-	-	-	-	-	-	-	-	-	-	-	-	-	-	-	-	-	-	-	-	-	-	-	-	-	-	-	-	-	-	-	-	-	-	-	-	-	-	-	-	-	-	-	-	-	-
1_7410301	1	23.44937135	BB	AA	BB	AA	BB	BB	AA	AA	BB	BB	BB	AA	BB	BB	AA	AA	BB	BB	BB	BB	BB	AA	AA	BB	AA	BB	BB	BB	BB	AA	-	AA	AA	-	BB	BB	BB	BB	BB	BB	BB	AA	AA	BB	AA	BB	-
1_7424283	1	23.4493714	-	-	-	-	-	-	-	-	-	-	-	-	-	-	-	-	-	-	-	-	-	-	-	-	-	-	-	-	-	-	-	-	-	-	-	-	-	-	-	-	-	-	-	-	-	-	-
1_7429894	1	23.44937145	BB	AA	BB	AA	BB	BB	AA	AA	BB	BB	BB	AA	BB	BB	AA	AA	BB	BB	BB	BB	BB	AA	AA	BB	AA	BB	BB	BB	BB	AA	-	AA	AA	-	BB	BB	BB	BB	BB	BB	BB	AA	AA	BB	AA	BB	-
1_7431890	1	23.4493715	BB	AA	BB	AA	BB	BB	AA	AA	BB	BB	BB	AA	BB	BB	AA	AA	BB	BB	BB	BB	BB	AA	AA	BB	AA	BB	BB	BB	BB	AA	-	AA	AA	-	BB	BB	BB	BB	BB	BB	BB	AA	AA	BB	AA	BB	-
1_7437236	1	24.72839803	BB	AA	BB	AA	BB	BB	AA	AA	BB	BB	BB	AA	BB	BB	AA	AA	BB	BB	BB	BB	BB	AA	AA	BB	AA	BB	BB	BB	BB	AA	-	AA	AA	-	BB	BB	BB	BB	BB	BB	BB	AA	AA	BB	AA	BB	-
1_7438312	1	24.72839808	-	-	-	-	-	-	-	-	-	-	-	-	-	-	-	-	-	-	-	-	-	-	-	-	-	-	-	-	-	-	-	-	-	-	-	-	-	-	-	-	-	-	-	-	-	-	-
1_7445310	1	24.72839813	BB	AA	BB	AA	BB	BB	AA	AA	BB	BB	BB	AA	BB	BB	AA	AA	BB	BB	BB	BB	BB	AA	AA	BB	AA	BB	BB	BB	BB	AA	-	AA	AA	-	BB	BB	BB	BB	BB	BB	BB	AA	AA	BB	AA	BB	-
1_7465888	1	24.72839818	BB	AA	BB	AA	BB	BB	AA	AA	BB	BB	BB	AA	BB	BB	AA	AA	BB	BB	BB	BB	BB	AA	AA	BB	AA	BB	BB	BB	BB	AA	-	AA	AA	-	BB	BB	BB	BB	BB	BB	BB	AA	AA	BB	AA	BB	-
1_7475267	1	24.72839823	-	-	-	-	-	-	-	-	-	-	-	-	-	-	-	-	-	-	-	-	-	-	-	-	-	-	-	-	-	-	-	-	-	-	-	-	-	-	-	-	-	-	-	-	-	-	-
1_7484303	1	24.72839828	BB	AA	BB	AA	BB	BB	AA	AA	BB	BB	BB	AA	BB	BB	AA	AA	BB	BB	BB	BB	BB	AA	AA	BB	AA	BB	BB	BB	BB	AA	-	AA	AA	-	BB	BB	BB	BB	BB	BB	BB	AA	AA	BB	AA	BB	-
1_7494351	1	24.72839833	BB	AA	BB	AA	BB	BB	AA	AA	BB	BB	BB	AA	BB	BB	AA	AA	BB	BB	BB	BB	BB	AA	AA	BB	AA	BB	BB	BB	BB	AA	-	AA	AA	-	BB	BB	BB	BB	BB	BB	BB	AA	AA	BB	AA	BB	-
1_7522306	1	24.72839838	BB	AA	BB	AA	BB	BB	AA	AA	BB	BB	BB	AA	BB	BB	AA	AA	BB	BB	BB	BB	BB	AA	AA	BB	AA	BB	BB	BB	BB	AA	-	AA	AA	-	BB	BB	BB	BB	BB	BB	BB	AA	AA	BB	AA	BB	-
1_7543836	1	24.72839843	BB	AA	BB	AA	BB	BB	AA	AA	BB	BB	BB	AA	BB	BB	AA	AA	BB	BB	BB	BB	BB	AA	AA	BB	AA	BB	BB	BB	BB	AA	-	AA	AA	-	BB	BB	BB	BB	BB	BB	BB	AA	AA	BB	AA	BB	-
1_7544403	1	24.72839848	BB	AA	BB	AA	BB	BB	AA	AA	BB	BB	BB	AA	BB	BB	AA	AA	BB	BB	BB	BB	BB	AA	AA	BB	AA	BB	BB	BB	BB	AA	-	AA	AA	-	BB	BB	BB	BB	BB	BB	BB	AA	AA	BB	AA	BB	-
1_7580532	1	24.72839853	-	-	-	-	-	-	-	-	-	-	-	-	-	-	-	-	-	-	-	-	-	-	-	-	-	-	-	-	-	-	-	-	-	-	-	-	-	-	-	-	-	-	-	-	-	-	-
1_7593126	1	24.72839858	BB	AA	BB	AA	BB	BB	AA	AA	BB	BB	BB	AA	BB	BB	AA	AA	BB	BB	BB	BB	BB	AA	AA	BB	AA	BB	BB	BB	BB	AA	-	AA	AA	-	BB	BB	BB	BB	BB	BB	BB	AA	AA	BB	AA	BB	-
1_7593633	1	24.72839863	BB	AA	BB	AA	BB	BB	AA	AA	BB	BB	BB	AA	BB	BB	AA	AA	BB	BB	BB	BB	BB	AA	AA	BB	AA	BB	BB	BB	BB	AA	-	AA	AA	AA	BB	BB	BB	BB	BB	BB	BB	AA	AA	BB	AA	BB	BB
1_7614131	1	24.72839868	BB	AA	BB	AA	BB	BB	AA	AA	BB	BB	BB	AA	BB	BB	AA	AA	BB	BB	BB	BB	BB	AA	AA	BB	AA	BB	BB	BB	BB	AA	-	AA	AA	AA	BB	BB	BB	BB	BB	BB	BB	AA	AA	BB	AA	BB	BB
1_7650142	1	24.72839873	BB	AA	BB	AA	BB	BB	AA	AA	BB	BB	BB	AA	BB	BB	AA	AA	BB	BB	BB	BB	BB	AA	AA	BB	AA	BB	BB	BB	BB	AA	-	AA	AA	AA	BB	BB	BB	BB	BB	BB	BB	AA	-	BB	AA	BB	BB
1_7664868	1	25.00802587	BB	AA	BB	AA	BB	BB	AA	AA	BB	BB	BB	AA	BB	BB	AA	AA	BB	BB	BB	BB	BB	AA	AA	BB	AA	BB	BB	BB	BB	AA	-	AA	AA	AA	BB	BB	BB	BB	BB	BB	BB	AA	-	BB	AA	BB	BB
1_7665868	1	25.00802592	BB	AA	BB	AA	BB	BB	AA	AA	BB	BB	BB	AA	BB	BB	AA	AA	BB	BB	BB	BB	BB	AA	AA	BB	AA	BB	BB	BB	BB	AA	-	AA	AA	AA	BB	BB	BB	BB	BB	BB	BB	AA	-	BB	AA	BB	BB
1_7683202	1	25.00802597	BB	AA	BB	AA	BB	BB	AA	AA	BB	BB	BB	AA	BB	BB	AA	AA	BB	BB	BB	BB	BB	AA	AA	BB	AA	BB	BB	BB	BB	AA	-	AA	AA	AA	BB	BB	BB	BB	BB	BB	BB	AA	-	BB	AA	BB	BB
1_7716764	1	25.52664241	BB	AA	BB	AA	BB	BB	AA	AA	BB	BB	BB	AA	BB	BB	AA	AA	BB	BB	BB	BB	BB	AA	AA	BB	AA	BB	BB	BB	BB	AA	-	AA	AA	AA	BB	BB	BB	BB	BB	BB	BB	AA	-	BB	AA	BB	-
1_7739748	1	25.52664246	BB	AA	BB	AA	BB	BB	AA	AA	BB	BB	BB	AA	BB	BB	AA	AA	BB	BB	BB	BB	BB	AA	AA	BB	AA	BB	BB	BB	BB	AA	-	AA	AA	AA	BB	BB	BB	BB	BB	BB	BB	AA	-	BB	AA	BB	-
1_7754490	1	25.52664251	BB	AA	BB	AA	BB	BB	AA	AA	BB	BB	BB	AA	BB	BB	AA	AA	BB	BB	BB	BB	BB	AA	AA	BB	AA	BB	BB	BB	BB	AA	-	AA	AA	AA	BB	BB	BB	BB	BB	BB	BB	AA	-	BB	AA	BB	-
1_7755743	1	25.52664256	BB	AA	BB	AA	BB	BB	AA	AA	BB	BB	BB	AA	BB	BB	AA	AA	BB	BB	BB	BB	BB	AA	AA	BB	AA	BB	BB	BB	BB	AA	-	AA	AA	AA	BB	BB	BB	BB	BB	BB	BB	AA	-	BB	AA	BB	-
1_7767631	1	25.52664261	BB	AA	BB	AA	BB	BB	AA	AA	BB	BB	BB	AA	BB	BB	AA	AA	BB	BB	BB	BB	BB	AA	AA	BB	AA	BB	BB	BB	BB	AA	-	AA	AA	AA	BB	BB	BB	BB	BB	BB	BB	AA	-	BB	AA	BB	-
1_7828835	1	25.52664266	BB	AA	BB	AA	BB	BB	AA	AA	BB	BB	BB	AA	BB	BB	AA	AA	BB	BB	BB	BB	BB	AA	AA	BB	AA	BB	BB	BB	BB	AA	-	AA	AA	AA	BB	BB	BB	BB	BB	BB	BB	AA	-	BB	AA	BB	-
1_7859606	1	25.52664271	-	-	-	-	-	-	-	-	-	-	-	-	-	-	-	-	-	-	-	-	-	-	-	-	-	-	-	-	-	-	-	-	-	-	-	-	-	-	-	-	-	-	-	-	-	-	-
1_7866404	1	25.52664276	-	-	-	-	-	-	-	-	-	-	-	-	-	-	-	-	-	-	-	-	-	-	-	-	-	-	-	-	-	-	-	-	-	-	-	-	-	-	-	-	-	-	-	-	-	-	-
1_7885816	1	25.52664281	BB	AA	BB	AA	BB	BB	AA	AA	BB	BB	BB	AA	BB	BB	AA	AA	BB	BB	BB	BB	BB	AA	AA	BB	AA	BB	BB	BB	BB	AA	-	AA	AA	AA	BB	BB	BB	BB	BB	BB	BB	AA	-	BB	AA	BB	-
1_7896127	1	25.52664286	BB	AA	BB	AA	BB	BB	AA	AA	BB	BB	BB	AA	BB	BB	AA	AA	BB	BB	BB	BB	BB	AA	AA	BB	AA	BB	BB	BB	BB	AA	-	AA	AA	AA	BB	BB	BB	BB	BB	BB	BB	AA	-	BB	AA	BB	-
1_7902134	1	25.52664291	-	-	-	-	-	-	-	-	-	-	-	-	-	-	-	-	-	-	-	-	-	-	-	-	-	-	-	-	-	-	-	-	-	-	-	-	-	-	-	-	-	-	-	-	-	-	-
1_7930372	1	25.52664296	BB	AA	BB	AA	BB	BB	AA	AA	BB	BB	BB	AA	BB	BB	AA	AA	BB	BB	BB	BB	BB	AA	AA	BB	AA	BB	BB	BB	BB	AA	-	AA	AA	AA	BB	BB	BB	BB	BB	BB	BB	AA	-	BB	AA	BB	-
1_7935215	1	25.52664301	BB	AA	BB	AA	BB	BB	AA	AA	BB	BB	BB	AA	BB	BB	AA	AA	BB	BB	BB	BB	BB	AA	AA	BB	AA	BB	BB	BB	BB	AA	-	AA	AA	AA	BB	BB	BB	BB	BB	BB	BB	AA	-	BB	AA	BB	-
1_7964924	1	26.70945855	BB	AA	BB	AA	BB	BB	AA	AA	BB	BB	BB	AA	BB	BB	AA	AA	BB	BB	BB	BB	BB	AA	AA	BB	AA	BB	BB	BB	BB	AA	-	AA	AA	AA	BB	BB	BB	BB	BB	BB	BB	AA	-	BB	AA	BB	-
1_7965077	1	26.7094586	BB	AA	BB	AA	BB	BB	AA	AA	BB	BB	BB	AA	BB	BB	AA	AA	BB	BB	BB	BB	BB	AA	AA	BB	AA	BB	BB	BB	BB	AA	-	AA	AA	AA	BB	BB	BB	BB	BB	BB	BB	AA	-	BB	AA	BB	-
1_7980406	1	26.70945865	BB	AA	BB	AA	BB	BB	AA	AA	BB	BB	BB	AA	BB	BB	AA	AA	BB	BB	BB	BB	BB	AA	AA	BB	AA	BB	BB	BB	BB	AA	-	AA	AA	AA	BB	BB	BB	BB	BB	BB	BB	AA	-	BB	AA	BB	-
1_7989140	1	26.7094587	BB	AA	BB	AA	BB	BB	AA	AA	BB	BB	BB	AA	BB	BB	AA	AA	BB	BB	BB	BB	BB	AA	AA	BB	AA	BB	BB	BB	BB	AA	-	AA	AA	AA	BB	BB	BB	BB	BB	BB	BB	AA	-	BB	AA	BB	-
1_7997201	1	26.70945875	BB	AA	BB	AA	BB	BB	AA	AA	BB	BB	BB	AA	BB	BB	AA	AA	BB	BB	BB	BB	BB	AA	AA	BB	AA	BB	BB	BB	BB	AA	-	AA	AA	AA	BB	BB	BB	BB	BB	BB	BB	AA	-	BB	AA	BB	-
1_8018529	1	26.7094588	-	-	-	-	-	-	-	-	-	-	-	-	-	-	-	-	-	-	-	-	-	-	-	-	-	-	-	-	-	-	-	-	-	-	-	-	-	-	-	-	-	-	-	-	-	-	-
1_8019396	1	26.70945885	BB	AA	BB	AA	BB	BB	AA	AA	BB	BB	BB	AA	BB	BB	AA	AA	BB	BB	BB	BB	BB	AA	AA	BB	AA	BB	BB	BB	BB	AA	-	AA	AA	AA	BB	BB	BB	BB	BB	BB	BB	AA	-	BB	AA	BB	-
1_8025591	1	26.7094589	BB	AA	BB	AA	BB	BB	AA	AA	BB	BB	BB	AA	BB	BB	AA	AA	BB	BB	BB	BB	BB	AA	AA	BB	AA	BB	BB	BB	BB	AA	-	AA	AA	AA	BB	BB	BB	BB	BB	BB	BB	AA	-	BB	AA	BB	-
1_8052705	1	28.3631869	BB	AA	BB	AA	BB	BB	AA	AA	BB	BB	BB	AA	BB	BB	AA	AA	BB	BB	BB	BB	BB	AA	AA	BB	AA	BB	BB	BB	BB	AA	-	AA	AA	AA	BB	BB	BB	BB	BB	BB	BB	AA	BB	BB	AA	BB	-
1_8065940	1	28.36318695	-	-	-	-	-	-	-	-	-	-	-	-	-	-	-	-	-	-	-	-	-	-	-	-	-	-	-	-	-	-	-	-	-	-	-	-	-	-	-	-	-	-	-	-	-	-	-
1_8069554	1	28.363187	-	-	-	-	-	-	-	-	-	-	-	-	-	-	-	-	-	-	-	-	-	-	-	-	-	-	-	-	-	-	-	-	-	-	-	-	-	-	-	-	-	-	-	-	-	-	-
1_8071024	1	28.36318705	-	-	-	-	-	-	-	-	-	-	-	-	-	-	-	-	-	-	-	-	-	-	-	-	-	-	-	-	-	-	-	-	-	-	-	-	-	-	-	-	-	-	-	-	-	-	-
1_8074628	1	28.3631871	BB	AA	BB	AA	BB	BB	AA	AA	BB	BB	BB	AA	BB	BB	AA	AA	BB	BB	BB	BB	BB	AA	AA	BB	AA	BB	BB	BB	BB	AA	-	AA	AA	AA	BB	BB	BB	BB	BB	BB	BB	AA	BB	BB	AA	BB	-
1_8076201	1	28.36318715	BB	AA	BB	AA	BB	BB	AA	AA	BB	BB	BB	AA	BB	BB	AA	AA	BB	BB	BB	BB	BB	AA	AA	BB	AA	BB	BB	BB	BB	AA	-	AA	AA	AA	BB	BB	BB	BB	BB	BB	BB	AA	BB	BB	AA	BB	-
1_8080738	1	28.3631872	-	-	-	-	-	-	-	-	-	-	-	-	-	-	-	-	-	-	-	-	-	-	-	-	-	-	-	-	-	-	-	-	-	-	-	-	-	-	-	-	-	-	-	-	-	-	-
1_8098849	1	28.36318725	BB	AA	BB	AA	BB	BB	AA	AA	BB	BB	BB	AA	BB	BB	AA	AA	BB	BB	BB	BB	BB	AA	AA	BB	AA	BB	BB	BB	BB	AA	-	AA	AA	AA	BB	BB	BB	BB	BB	BB	BB	AA	BB	BB	AA	BB	-
1_8099395	1	28.3631873	BB	AA	BB	AA	BB	BB	AA	AA	BB	BB	BB	AA	BB	BB	AA	AA	BB	BB	BB	BB	BB	AA	AA	BB	AA	BB	BB	BB	BB	AA	-	AA	AA	AA	BB	BB	BB	BB	BB	BB	BB	AA	BB	BB	AA	BB	-
1_8105802	1	28.36318735	BB	AA	BB	AA	BB	BB	AA	AA	BB	BB	BB	AA	BB	BB	AA	AA	BB	BB	BB	BB	BB	AA	AA	BB	AA	BB	BB	BB	BB	AA	-	AA	AA	AA	BB	BB	BB	BB	BB	BB	BB	AA	BB	BB	AA	BB	-
1_8109563	1	28.3631874	-	-	-	-	-	-	-	-	-	-	-	-	-	-	-	-	-	-	-	-	-	-	-	-	-	-	-	-	-	-	-	-	-	-	-	-	-	-	-	-	-	-	-	-	-	-	-
1_8109663	1	28.36318745	BB	AA	BB	AA	BB	BB	AA	AA	BB	BB	BB	AA	BB	BB	AA	AA	BB	BB	BB	BB	BB	AA	AA	BB	AA	BB	BB	BB	BB	AA	-	AA	AA	AA	BB	BB	BB	BB	BB	BB	BB	AA	BB	BB	AA	BB	-
1_8128361	1	28.3631875	BB	AA	BB	AA	BB	BB	AA	AA	BB	BB	BB	AA	BB	BB	AA	AA	BB	BB	BB	BB	BB	AA	AA	BB	AA	BB	BB	BB	BB	AA	-	AA	AA	AA	BB	BB	BB	BB	BB	BB	BB	AA	BB	BB	AA	BB	-
1_8158758	1	28.36318755	BB	AA	BB	AA	BB	BB	AA	AA	BB	BB	BB	AA	BB	BB	AA	AA	BB	BB	BB	BB	BB	AA	AA	BB	AA	BB	BB	BB	BB	AA	-	AA	AA	AA	BB	BB	BB	BB	BB	BB	BB	AA	BB	BB	AA	BB	-
1_8167072	1	28.3631876	BB	AA	BB	AA	BB	BB	AA	AA	BB	BB	BB	AA	BB	BB	AA	AA	BB	BB	BB	BB	BB	AA	AA	BB	AA	BB	BB	BB	BB	AA	-	AA	AA	AA	BB	BB	BB	BB	BB	BB	BB	AA	BB	BB	AA	BB	-
1_8170417	1	28.36318765	BB	AA	BB	AA	BB	BB	AA	AA	BB	BB	BB	AA	BB	BB	AA	AA	BB	BB	BB	BB	BB	AA	AA	BB	AA	BB	BB	BB	BB	AA	-	AA	AA	AA	BB	BB	BB	BB	BB	BB	BB	AA	BB	BB	AA	BB	-
1_8170970	1	28.3631877	BB	AA	BB	AA	BB	BB	AA	AA	BB	BB	BB	AA	BB	BB	AA	AA	BB	BB	BB	BB	BB	AA	AA	BB	AA	BB	BB	BB	BB	AA	-	AA	AA	AA	BB	BB	BB	BB	BB	BB	BB	AA	BB	BB	AA	BB	-
1_8174167	1	28.36318775	BB	AA	BB	AA	BB	BB	AA	AA	BB	BB	BB	AA	BB	BB	AA	AA	BB	BB	BB	BB	BB	AA	AA	BB	AA	BB	BB	BB	BB	AA	-	AA	AA	AA	BB	BB	BB	BB	BB	BB	BB	AA	BB	BB	AA	BB	-
1_8177730	1	28.3631878	BB	AA	BB	AA	BB	BB	AA	AA	BB	BB	BB	AA	BB	BB	AA	AA	BB	BB	BB	BB	BB	AA	AA	BB	AA	BB	BB	BB	BB	AA	-	AA	AA	AA	BB	BB	BB	BB	BB	BB	BB	AA	BB	BB	AA	BB	-
1_8177746	1	28.36318785	BB	AA	BB	AA	BB	BB	AA	AA	BB	BB	BB	AA	BB	BB	AA	AA	BB	BB	BB	BB	BB	AA	AA	BB	AA	BB	BB	BB	BB	AA	-	AA	AA	AA	BB	BB	BB	BB	BB	BB	BB	AA	BB	BB	AA	BB	-
1_8182678	1	28.3631879	-	-	-	-	-	-	-	-	-	-	-	-	-	-	-	-	-	-	-	-	-	-	-	-	-	-	-	-	-	-	-	-	-	-	-	-	-	-	-	-	-	-	-	-	-	-	-
1_8184194	1	28.36318795	BB	AA	BB	AA	BB	BB	AA	AA	BB	BB	BB	AA	BB	BB	AA	AA	BB	BB	BB	BB	BB	AA	AA	BB	AA	BB	BB	BB	BB	AA	-	AA	AA	AA	BB	BB	BB	BB	BB	BB	BB	AA	BB	BB	AA	BB	-
1_8195130	1	28.363188	-	-	-	-	-	-	-	-	-	-	-	-	-	-	-	-	-	-	-	-	-	-	-	-	-	-	-	-	-	-	-	-	-	-	-	-	-	-	-	-	-	-	-	-	-	-	-
1_8197675	1	28.36318805	BB	AA	BB	AA	BB	BB	AA	AA	BB	BB	BB	AA	BB	BB	AA	AA	BB	BB	BB	BB	BB	AA	AA	BB	AA	BB	BB	BB	BB	AA	-	AA	AA	AA	BB	BB	BB	BB	BB	BB	BB	AA	BB	BB	AA	BB	-
1_8226940	1	28.3631881	BB	AA	BB	AA	BB	BB	AA	AA	BB	BB	BB	AA	BB	BB	AA	AA	BB	BB	BB	BB	BB	AA	AA	BB	AA	BB	BB	BB	BB	AA	-	AA	AA	AA	BB	BB	BB	BB	BB	BB	BB	AA	BB	BB	AA	BB	-
1_8242893	1	28.36318815	BB	AA	BB	AA	BB	BB	AA	AA	BB	BB	BB	AA	BB	BB	AA	AA	BB	BB	BB	BB	BB	AA	AA	BB	AA	BB	BB	BB	BB	AA	-	AA	AA	AA	BB	BB	BB	BB	BB	BB	BB	AA	BB	BB	AA	BB	-
1_8243495	1	28.3631882	BB	AA	BB	AA	BB	BB	AA	AA	BB	BB	BB	AA	BB	BB	AA	AA	BB	BB	BB	BB	BB	AA	AA	BB	AA	BB	BB	BB	BB	AA	-	AA	AA	AA	BB	BB	BB	BB	BB	BB	BB	AA	BB	BB	AA	BB	-
1_8253125	1	28.36318825	BB	AA	BB	AA	BB	BB	AA	AA	BB	BB	BB	AA	BB	BB	AA	AA	BB	BB	BB	BB	BB	AA	AA	BB	AA	BB	BB	BB	BB	AA	-	AA	AA	AA	BB	BB	BB	BB	BB	BB	BB	AA	BB	BB	AA	BB	-
1_8263785	1	28.3631883	BB	AA	BB	AA	BB	BB	AA	AA	BB	BB	BB	AA	BB	BB	AA	AA	BB	BB	BB	BB	BB	AA	AA	BB	AA	BB	BB	BB	BB	AA	-	AA	AA	AA	BB	BB	BB	BB	BB	BB	BB	AA	BB	BB	AA	BB	-
1_8276180	1	28.36318835	BB	AA	BB	AA	BB	BB	AA	AA	BB	BB	BB	AA	BB	BB	AA	AA	BB	BB	BB	BB	BB	AA	AA	BB	AA	BB	BB	BB	BB	AA	-	AA	AA	AA	BB	BB	BB	BB	BB	BB	BB	AA	BB	BB	AA	BB	-
1_8284170	1	28.3631884	BB	AA	BB	AA	BB	BB	AA	AA	BB	BB	BB	AA	BB	BB	AA	AA	BB	BB	BB	BB	BB	AA	AA	BB	AA	BB	BB	BB	BB	AA	-	AA	AA	AA	BB	BB	BB	BB	BB	BB	BB	AA	BB	BB	AA	BB	-
1_8292796	1	29.15582889	BB	AA	BB	AA	BB	BB	AA	AA	BB	BB	BB	AA	BB	BB	AA	AA	BB	BB	BB	BB	BB	-	AA	BB	AA	BB	BB	BB	BB	AA	-	AA	AA	AA	BB	BB	BB	BB	BB	BB	BB	AA	BB	BB	AA	BB	-
1_8297379	1	29.15582894	BB	AA	BB	AA	BB	BB	AA	AA	BB	BB	BB	AA	BB	BB	AA	AA	BB	BB	BB	BB	BB	-	AA	BB	AA	BB	BB	BB	BB	AA	-	AA	AA	AA	BB	BB	BB	BB	BB	BB	BB	AA	BB	BB	AA	BB	-
1_8297613	1	29.15582899	BB	AA	BB	AA	BB	BB	AA	AA	BB	BB	BB	AA	BB	BB	AA	AA	BB	BB	BB	BB	BB	-	AA	BB	AA	BB	BB	BB	BB	AA	-	AA	AA	AA	BB	BB	BB	BB	BB	BB	BB	AA	BB	BB	AA	BB	-
1_8305131	1	29.15582904	-	-	-	-	-	-	-	-	-	-	-	-	-	-	-	-	-	-	-	-	-	-	-	-	-	-	-	-	-	-	-	-	-	-	-	-	-	-	-	-	-	-	-	-	-	-	-
1_8316125	1	29.15582909	BB	AA	BB	AA	BB	BB	AA	AA	BB	BB	BB	AA	BB	BB	AA	AA	BB	BB	BB	BB	BB	-	AA	BB	AA	BB	BB	BB	BB	AA	-	AA	AA	AA	BB	BB	BB	BB	BB	BB	BB	AA	BB	BB	AA	BB	-
1_8320962	1	29.15582914	BB	AA	BB	AA	BB	BB	AA	AA	BB	BB	BB	AA	BB	BB	AA	AA	BB	BB	BB	BB	BB	-	AA	BB	AA	BB	BB	BB	BB	AA	-	AA	AA	AA	BB	BB	BB	BB	BB	BB	BB	AA	BB	BB	AA	BB	-
1_8337165	1	29.15582919	BB	AA	BB	AA	BB	BB	AA	AA	BB	BB	BB	AA	BB	BB	AA	AA	BB	BB	BB	BB	BB	BB	AA	BB	AA	BB	BB	BB	BB	AA	-	AA	AA	AA	BB	BB	BB	BB	BB	BB	BB	AA	BB	BB	AA	BB	-
1_8338580	1	29.15582924	-	-	-	-	-	-	-	-	-	-	-	-	-	-	-	-	-	-	-	-	-	-	-	-	-	-	-	-	-	-	-	-	-	-	-	-	-	-	-	-	-	-	-	-	-	-	-
1_8338738	1	29.15582929	BB	AA	BB	AA	BB	BB	AA	AA	BB	BB	BB	AA	BB	BB	AA	AA	BB	BB	BB	BB	BB	BB	AA	BB	AA	BB	BB	BB	BB	AA	-	AA	AA	AA	BB	BB	BB	BB	BB	BB	BB	AA	BB	BB	AA	BB	-
1_8339666	1	29.15582934	-	-	-	-	-	-	-	-	-	-	-	-	-	-	-	-	-	-	-	-	-	-	-	-	-	-	-	-	-	-	-	-	-	-	-	-	-	-	-	-	-	-	-	-	-	-	-
1_8342139	1	29.15582939	BB	AA	BB	AA	BB	BB	AA	AA	BB	BB	BB	AA	BB	BB	AA	AA	BB	BB	BB	BB	BB	BB	AA	BB	AA	BB	BB	BB	BB	AA	-	AA	AA	AA	BB	BB	BB	BB	BB	BB	BB	AA	BB	BB	AA	BB	-
1_8349466	1	29.15582944	-	-	-	-	-	-	-	-	-	-	-	-	-	-	-	-	-	-	-	-	-	-	-	-	-	-	-	-	-	-	-	-	-	-	-	-	-	-	-	-	-	-	-	-	-	-	-
1_8353778	1	29.15582949	BB	AA	BB	AA	BB	BB	AA	AA	BB	BB	BB	AA	BB	BB	AA	AA	BB	BB	BB	BB	BB	BB	AA	BB	AA	BB	BB	BB	BB	AA	-	AA	AA	AA	BB	BB	BB	BB	BB	BB	BB	AA	BB	BB	AA	BB	-
1_8358841	1	29.15582954	BB	AA	BB	AA	BB	BB	AA	AA	BB	BB	BB	AA	BB	BB	AA	AA	BB	BB	BB	BB	BB	BB	AA	BB	AA	-	BB	BB	BB	AA	-	AA	AA	AA	BB	BB	BB	BB	BB	BB	BB	AA	BB	BB	AA	BB	-
1_8359772	1	29.15582959	BB	AA	BB	AA	BB	BB	AA	AA	BB	BB	BB	AA	BB	BB	AA	AA	BB	BB	BB	BB	BB	BB	AA	BB	AA	-	BB	BB	BB	AA	-	AA	AA	AA	BB	BB	BB	BB	BB	BB	BB	AA	BB	BB	AA	BB	-
1_8364029	1	29.15582964	BB	AA	BB	AA	BB	BB	AA	AA	BB	BB	BB	AA	BB	BB	AA	AA	BB	BB	BB	BB	BB	BB	AA	BB	AA	-	BB	BB	BB	AA	-	AA	AA	AA	BB	BB	BB	BB	BB	BB	BB	AA	BB	BB	AA	BB	-
1_8370573	1	29.15582969	BB	AA	BB	AA	BB	BB	AA	AA	BB	BB	BB	AA	BB	BB	AA	AA	BB	BB	BB	BB	BB	BB	AA	BB	AA	-	BB	BB	BB	AA	-	AA	AA	AA	BB	BB	BB	BB	BB	BB	BB	AA	BB	BB	AA	BB	-
1_8370628	1	29.15582974	BB	AA	BB	AA	BB	BB	AA	AA	BB	BB	BB	AA	BB	BB	AA	AA	BB	BB	BB	BB	BB	BB	AA	BB	AA	-	BB	BB	BB	AA	-	AA	AA	AA	BB	BB	BB	BB	BB	BB	BB	AA	BB	BB	AA	BB	-
1_8376407	1	29.15582979	BB	AA	BB	AA	BB	BB	AA	AA	BB	BB	BB	AA	BB	BB	AA	AA	BB	BB	BB	BB	BB	BB	AA	BB	AA	-	BB	BB	BB	AA	-	AA	AA	AA	BB	BB	BB	BB	BB	BB	BB	AA	BB	BB	AA	BB	-
1_8384238	1	29.15582984	BB	AA	BB	AA	BB	BB	AA	AA	BB	BB	BB	AA	BB	BB	AA	AA	BB	BB	BB	BB	BB	BB	AA	BB	AA	-	BB	BB	BB	AA	-	AA	AA	AA	BB	BB	BB	BB	BB	BB	BB	AA	BB	BB	AA	BB	-
1_8393795	1	29.7807114	BB	AA	BB	AA	BB	BB	AA	AA	BB	BB	BB	AA	BB	BB	AA	AA	-	BB	BB	BB	BB	BB	AA	BB	AA	AA	BB	BB	BB	AA	-	AA	AA	AA	BB	BB	BB	BB	BB	BB	BB	AA	BB	BB	AA	BB	-
1_8405662	1	30.27070258	BB	AA	BB	AA	BB	BB	AA	AA	BB	BB	BB	AA	BB	BB	AA	AA	AA	BB	BB	BB	BB	BB	AA	BB	AA	AA	BB	BB	BB	AA	-	AA	AA	AA	BB	BB	BB	BB	BB	BB	BB	AA	BB	BB	AA	BB	-
1_8407392	1	30.27070263	BB	AA	BB	AA	BB	BB	AA	AA	BB	BB	BB	AA	BB	BB	AA	AA	AA	BB	BB	BB	BB	BB	AA	BB	AA	AA	BB	BB	BB	AA	-	AA	AA	AA	BB	BB	BB	BB	BB	BB	BB	AA	BB	BB	AA	BB	-
1_8426708	1	30.27070268	BB	AA	BB	AA	BB	BB	AA	AA	BB	BB	BB	AA	BB	BB	AA	AA	AA	BB	BB	BB	BB	BB	AA	BB	AA	AA	BB	BB	BB	AA	-	AA	AA	AA	BB	BB	BB	BB	BB	BB	BB	AA	BB	BB	AA	BB	-
1_8432335	1	30.27070273	BB	AA	BB	AA	BB	BB	AA	AA	BB	BB	BB	AA	BB	BB	AA	AA	AA	BB	BB	BB	BB	BB	AA	BB	AA	AA	BB	BB	BB	AA	-	AA	AA	AA	BB	BB	BB	BB	BB	BB	BB	AA	BB	BB	AA	BB	-
1_8438877	1	30.27070278	BB	AA	BB	AA	BB	BB	AA	AA	BB	BB	BB	AA	BB	BB	AA	AA	AA	BB	BB	BB	BB	BB	AA	BB	AA	AA	BB	BB	BB	AA	-	AA	AA	AA	BB	BB	BB	BB	BB	BB	BB	AA	BB	BB	AA	BB	-
1_8444814	1	30.27070283	BB	AA	BB	AA	BB	BB	AA	AA	BB	BB	BB	AA	BB	BB	AA	AA	AA	BB	BB	BB	BB	BB	AA	BB	AA	AA	BB	BB	BB	AA	-	AA	AA	AA	BB	BB	BB	BB	BB	BB	BB	AA	BB	BB	AA	BB	-
1_8451300	1	30.27070288	BB	AA	BB	AA	BB	BB	AA	AA	BB	BB	BB	AA	BB	BB	AA	AA	AA	BB	BB	BB	BB	BB	AA	BB	AA	AA	BB	BB	BB	AA	-	AA	AA	AA	BB	BB	BB	BB	BB	BB	BB	AA	BB	BB	AA	BB	-
1_8481585	1	30.27070293	-	-	-	-	-	-	-	-	-	-	-	-	-	-	-	-	-	-	-	-	-	-	-	-	-	-	-	-	-	-	-	-	-	-	-	-	-	-	-	-	-	-	-	-	-	-	-
1_8482716	1	30.27070298	BB	AA	BB	AA	BB	BB	AA	AA	BB	BB	BB	AA	BB	BB	AA	AA	AA	BB	BB	BB	BB	BB	AA	BB	AA	AA	BB	BB	BB	AA	-	AA	AA	AA	BB	BB	BB	BB	BB	BB	BB	AA	BB	BB	AA	BB	-
1_8483147	1	30.27070303	BB	AA	BB	AA	BB	BB	AA	AA	BB	BB	BB	AA	BB	BB	AA	AA	AA	BB	BB	BB	BB	BB	AA	BB	AA	AA	BB	BB	BB	AA	-	AA	AA	AA	BB	BB	BB	BB	BB	BB	BB	AA	BB	BB	AA	BB	-
1_8490921	1	30.27070308	BB	AA	BB	AA	BB	BB	AA	AA	BB	BB	BB	AA	BB	BB	AA	AA	AA	BB	BB	BB	BB	BB	AA	BB	AA	AA	BB	BB	BB	AA	-	AA	AA	AA	BB	BB	BB	BB	BB	BB	BB	AA	BB	BB	AA	BB	-
1_8491817	1	30.27070313	BB	AA	BB	AA	BB	BB	AA	AA	BB	BB	BB	AA	BB	BB	AA	AA	AA	BB	BB	BB	BB	BB	AA	BB	AA	AA	BB	BB	BB	AA	-	AA	AA	AA	BB	BB	BB	BB	BB	BB	BB	AA	BB	BB	AA	BB	-
1_8493768	1	30.27070318	BB	AA	BB	AA	BB	BB	AA	AA	BB	BB	BB	AA	BB	BB	AA	AA	AA	BB	BB	BB	BB	BB	AA	BB	AA	AA	BB	BB	BB	AA	-	AA	AA	AA	BB	BB	BB	BB	BB	BB	BB	AA	BB	BB	AA	BB	-
1_8501525	1	30.27070323	BB	AA	BB	AA	BB	BB	AA	AA	BB	BB	BB	AA	BB	BB	AA	AA	AA	BB	BB	BB	BB	BB	AA	BB	AA	AA	BB	BB	BB	AA	-	AA	AA	AA	BB	BB	BB	BB	BB	BB	BB	AA	BB	BB	AA	BB	-
1_8502198	1	30.27070328	BB	AA	BB	AA	BB	BB	AA	AA	BB	BB	BB	AA	BB	BB	AA	AA	AA	BB	BB	BB	BB	BB	AA	BB	AA	AA	BB	BB	BB	AA	-	AA	AA	AA	BB	BB	BB	BB	BB	BB	BB	AA	BB	BB	AA	BB	-
1_8536527	1	31.0751232	BB	AA	BB	AA	BB	BB	AA	AA	BB	BB	BB	AA	BB	BB	AA	AA	AA	BB	BB	BB	BB	BB	AA	BB	AA	AA	BB	BB	BB	AA	-	AA	AA	AA	BB	-	BB	BB	BB	BB	BB	AA	BB	BB	AA	BB	-
1_8537787	1	31.07512325	BB	AA	BB	AA	BB	BB	AA	AA	BB	BB	BB	AA	BB	BB	AA	AA	AA	BB	BB	BB	BB	BB	AA	BB	AA	AA	BB	BB	BB	AA	-	AA	AA	AA	BB	-	BB	BB	BB	BB	BB	AA	BB	BB	AA	BB	-
1_8540522	1	31.0751233	BB	AA	BB	AA	BB	BB	AA	AA	BB	BB	BB	AA	BB	BB	AA	AA	AA	BB	BB	BB	BB	BB	AA	BB	AA	AA	BB	BB	BB	AA	-	AA	AA	AA	BB	-	BB	BB	BB	BB	BB	AA	BB	BB	AA	BB	-
1_8541596	1	31.07512335	BB	AA	BB	AA	BB	BB	AA	AA	BB	BB	BB	AA	BB	BB	AA	AA	AA	BB	BB	BB	BB	BB	AA	BB	AA	AA	BB	BB	BB	AA	-	AA	AA	AA	BB	-	BB	BB	BB	BB	BB	AA	BB	BB	AA	BB	-
1_8546936	1	31.0751234	BB	AA	BB	AA	BB	BB	AA	AA	BB	BB	BB	AA	BB	BB	AA	AA	AA	BB	BB	BB	BB	BB	AA	BB	AA	AA	BB	BB	BB	AA	-	AA	AA	AA	BB	-	BB	BB	BB	BB	BB	AA	BB	BB	AA	BB	-
1_8553792	1	31.07512345	BB	AA	BB	AA	BB	BB	AA	AA	BB	BB	BB	AA	BB	BB	AA	AA	AA	BB	BB	BB	BB	BB	AA	BB	AA	AA	BB	BB	BB	AA	-	AA	AA	AA	BB	-	BB	BB	BB	BB	BB	AA	BB	BB	AA	BB	-
1_8559955	1	31.0751235	BB	AA	BB	AA	BB	BB	AA	AA	BB	BB	BB	AA	BB	BB	AA	AA	AA	BB	BB	BB	BB	BB	AA	BB	AA	AA	BB	BB	BB	AA	-	AA	AA	AA	BB	-	BB	BB	BB	BB	BB	AA	BB	BB	AA	BB	-
1_8562408	1	31.07512355	BB	AA	BB	AA	BB	BB	AA	AA	BB	BB	BB	AA	BB	BB	AA	AA	AA	BB	BB	BB	BB	BB	AA	BB	AA	AA	BB	BB	BB	AA	-	AA	AA	AA	BB	-	BB	BB	BB	BB	BB	AA	BB	BB	AA	BB	-
1_8565489	1	31.0751236	BB	AA	BB	AA	BB	BB	AA	AA	BB	BB	BB	AA	BB	BB	AA	AA	AA	BB	BB	BB	BB	BB	AA	BB	AA	AA	BB	BB	BB	AA	-	AA	AA	AA	BB	-	BB	BB	BB	BB	BB	AA	BB	BB	AA	BB	-
1_8570725	1	31.07512365	BB	AA	BB	AA	BB	BB	AA	AA	BB	BB	BB	AA	BB	BB	AA	AA	AA	BB	BB	BB	BB	BB	AA	BB	AA	AA	BB	BB	BB	AA	-	AA	AA	AA	BB	-	BB	BB	BB	BB	BB	AA	BB	BB	AA	BB	-
1_8572561	1	31.0751237	BB	AA	BB	AA	BB	BB	AA	AA	BB	BB	BB	AA	BB	BB	AA	AA	AA	BB	BB	BB	BB	BB	AA	BB	AA	AA	BB	BB	BB	AA	-	AA	AA	AA	BB	-	BB	BB	BB	BB	BB	AA	BB	BB	AA	BB	-
1_8572691	1	31.07512375	-	-	-	-	-	-	-	-	-	-	-	-	-	-	-	-	-	-	-	-	-	-	-	-	-	-	-	-	-	-	-	-	-	-	-	-	-	-	-	-	-	-	-	-	-	-	-
1_8582090	1	31.0751238	BB	AA	BB	AA	BB	BB	AA	AA	BB	BB	BB	AA	BB	BB	AA	AA	AA	BB	BB	BB	BB	BB	AA	BB	AA	AA	BB	BB	BB	AA	-	AA	AA	AA	BB	-	BB	BB	BB	BB	BB	AA	BB	BB	AA	BB	-
1_8584662	1	31.07512385	-	-	-	-	-	-	-	-	-	-	-	-	-	-	-	-	-	-	-	-	-	-	-	-	-	-	-	-	-	-	-	-	-	-	-	-	-	-	-	-	-	-	-	-	-	-	-
1_8586358	1	31.0751239	BB	AA	BB	AA	BB	BB	AA	AA	BB	BB	BB	AA	BB	BB	AA	AA	AA	BB	BB	BB	BB	BB	AA	BB	AA	AA	BB	BB	BB	AA	-	AA	AA	AA	BB	-	BB	BB	BB	BB	BB	AA	BB	BB	AA	BB	-
1_8588010	1	31.07512395	BB	AA	BB	AA	BB	BB	AA	AA	BB	BB	BB	AA	BB	BB	AA	AA	AA	BB	BB	BB	BB	BB	AA	BB	AA	AA	BB	BB	BB	AA	-	AA	AA	AA	BB	-	BB	BB	BB	BB	BB	AA	BB	BB	AA	BB	-
1_8590873	1	31.075124	-	-	-	-	-	-	-	-	-	-	-	-	-	-	-	-	-	-	-	-	-	-	-	-	-	-	-	-	-	-	-	-	-	-	-	-	-	-	-	-	-	-	-	-	-	-	-
1_8622472	1	31.07512405	BB	AA	BB	AA	BB	BB	AA	AA	BB	BB	BB	AA	BB	BB	AA	AA	AA	BB	BB	BB	BB	BB	AA	BB	AA	AA	BB	BB	BB	AA	-	AA	AA	AA	BB	-	BB	BB	BB	BB	BB	AA	BB	BB	AA	BB	-
1_8633670	1	31.0751241	BB	AA	BB	AA	BB	BB	AA	AA	BB	BB	BB	AA	BB	BB	AA	AA	AA	BB	BB	BB	BB	BB	AA	BB	AA	AA	BB	BB	BB	AA	-	AA	AA	AA	BB	-	BB	BB	BB	BB	BB	AA	BB	BB	AA	BB	-
1_8659236	1	31.07512415	BB	AA	BB	AA	BB	BB	AA	AA	BB	BB	BB	AA	BB	BB	AA	AA	AA	BB	BB	BB	BB	BB	AA	BB	AA	AA	BB	BB	BB	AA	-	AA	AA	AA	BB	-	BB	BB	BB	BB	BB	AA	BB	BB	AA	BB	-
1_8669366	1	31.0751242	BB	AA	BB	AA	BB	BB	AA	AA	BB	BB	BB	AA	BB	BB	AA	AA	AA	BB	BB	BB	BB	BB	AA	BB	AA	AA	BB	BB	BB	AA	-	AA	AA	AA	BB	-	BB	BB	BB	BB	BB	AA	BB	BB	AA	BB	-
1_8672673	1	31.07512425	BB	AA	BB	AA	BB	BB	AA	AA	BB	BB	BB	AA	BB	BB	AA	AA	AA	BB	BB	BB	BB	BB	AA	BB	AA	AA	BB	BB	BB	AA	-	AA	AA	AA	BB	-	BB	BB	BB	BB	BB	AA	BB	BB	AA	BB	-
1_8673563	1	31.0751243	BB	AA	BB	AA	BB	BB	AA	AA	BB	BB	BB	AA	BB	BB	AA	AA	AA	BB	BB	BB	BB	BB	AA	BB	AA	AA	BB	BB	BB	AA	-	AA	AA	AA	BB	-	BB	BB	BB	BB	BB	AA	BB	BB	AA	BB	-
1_8673732	1	31.07512435	BB	AA	BB	AA	BB	BB	AA	AA	BB	BB	BB	AA	BB	BB	AA	AA	AA	BB	BB	BB	BB	BB	AA	BB	AA	AA	BB	BB	BB	AA	-	AA	AA	AA	BB	-	BB	BB	BB	BB	BB	AA	BB	BB	AA	BB	-
1_8674630	1	31.0751244	BB	AA	BB	AA	BB	BB	AA	AA	BB	BB	BB	AA	BB	BB	AA	AA	AA	BB	BB	BB	BB	BB	AA	BB	AA	AA	BB	BB	BB	AA	-	AA	AA	AA	BB	-	BB	BB	BB	BB	BB	AA	BB	BB	AA	BB	-
1_8677250	1	31.07512445	-	-	-	-	-	-	-	-	-	-	-	-	-	-	-	-	-	-	-	-	-	-	-	-	-	-	-	-	-	-	-	-	-	-	-	-	-	-	-	-	-	-	-	-	-	-	-
1_8679374	1	31.24710175	-	-	-	-	-	-	-	-	-	-	-	-	-	-	-	-	-	-	-	-	-	-	-	-	-	-	-	-	-	-	-	-	-	-	-	-	-	-	-	-	-	-	-	-	-	-	-
1_8685784	1	31.2471018	BB	AA	BB	AA	BB	BB	AA	AA	BB	BB	BB	AA	BB	BB	AA	AA	AA	BB	BB	BB	BB	BB	AA	BB	AA	AA	BB	BB	BB	AA	-	-	AA	AA	BB	AA	BB	BB	BB	BB	BB	AA	BB	BB	AA	BB	-
1_8687355	1	31.24710185	BB	AA	BB	AA	BB	BB	AA	AA	BB	BB	BB	AA	BB	BB	AA	AA	AA	BB	BB	BB	BB	BB	AA	BB	AA	AA	BB	BB	BB	AA	-	-	AA	AA	BB	AA	BB	BB	BB	BB	BB	AA	BB	BB	AA	BB	-
1_8690124	1	31.2471019	BB	AA	BB	AA	BB	BB	AA	AA	BB	BB	BB	AA	BB	BB	AA	AA	AA	BB	BB	BB	BB	BB	AA	BB	AA	AA	BB	BB	BB	AA	-	-	AA	AA	BB	AA	BB	BB	BB	BB	BB	AA	BB	BB	AA	BB	-
1_8697796	1	31.24710195	BB	AA	BB	AA	BB	BB	AA	AA	BB	BB	BB	AA	BB	BB	AA	AA	AA	BB	BB	BB	BB	BB	AA	BB	AA	AA	BB	BB	BB	AA	-	-	AA	AA	BB	AA	BB	BB	BB	BB	BB	AA	BB	BB	AA	BB	-
1_8697964	1	31.247102	BB	AA	BB	AA	BB	BB	AA	AA	BB	BB	BB	AA	BB	BB	AA	AA	AA	BB	BB	BB	BB	BB	AA	BB	AA	AA	BB	BB	BB	AA	-	-	AA	AA	BB	AA	BB	BB	BB	BB	BB	AA	BB	BB	AA	BB	-
1_8709265	1	31.24710205	BB	AA	BB	AA	BB	BB	AA	AA	BB	BB	BB	AA	BB	BB	AA	AA	AA	BB	BB	BB	BB	BB	AA	BB	AA	AA	BB	BB	BB	AA	-	-	AA	AA	BB	AA	BB	BB	BB	BB	BB	AA	BB	BB	AA	BB	-
1_8723667	1	31.2471021	BB	AA	BB	AA	BB	BB	AA	AA	BB	BB	BB	AA	BB	BB	AA	AA	AA	BB	BB	BB	BB	BB	AA	BB	AA	AA	BB	BB	BB	AA	-	-	AA	AA	BB	AA	BB	BB	BB	BB	BB	AA	BB	BB	AA	BB	-
1_8729332	1	31.24710215	BB	AA	BB	AA	BB	BB	AA	AA	BB	BB	BB	AA	BB	BB	AA	AA	AA	BB	BB	BB	BB	BB	AA	BB	AA	AA	BB	BB	BB	AA	-	-	AA	AA	BB	AA	BB	BB	BB	BB	BB	AA	BB	BB	AA	BB	-
1_8729714	1	31.2471022	BB	AA	BB	AA	BB	BB	AA	AA	BB	BB	BB	AA	BB	BB	AA	AA	AA	BB	BB	BB	BB	BB	AA	BB	AA	AA	BB	BB	BB	AA	-	-	AA	AA	BB	AA	BB	BB	BB	BB	BB	AA	BB	BB	AA	BB	-
1_8735158	1	31.24710225	-	-	-	-	-	-	-	-	-	-	-	-	-	-	-	-	-	-	-	-	-	-	-	-	-	-	-	-	-	-	-	-	-	-	-	-	-	-	-	-	-	-	-	-	-	-	-
1_8749960	1	31.2471023	BB	AA	BB	AA	BB	BB	AA	AA	BB	BB	BB	AA	BB	BB	AA	AA	AA	BB	BB	BB	BB	BB	AA	BB	AA	AA	BB	BB	BB	AA	-	-	AA	AA	BB	AA	BB	BB	BB	BB	BB	AA	BB	BB	AA	BB	-
1_8753154	1	31.24710235	BB	AA	BB	AA	BB	BB	AA	AA	BB	BB	BB	AA	BB	BB	AA	AA	AA	BB	BB	BB	BB	BB	AA	BB	AA	AA	BB	BB	BB	AA	-	-	AA	AA	BB	AA	BB	BB	BB	BB	BB	AA	BB	BB	AA	BB	-
1_8756105	1	31.2471024	BB	AA	BB	AA	BB	BB	AA	AA	BB	BB	BB	AA	BB	BB	AA	AA	AA	BB	BB	BB	BB	BB	AA	BB	AA	AA	BB	BB	BB	AA	-	-	AA	AA	BB	AA	BB	BB	BB	BB	BB	AA	BB	BB	AA	BB	-
1_8757316	1	31.24710245	BB	AA	BB	AA	BB	BB	AA	AA	BB	BB	BB	AA	BB	BB	AA	AA	AA	BB	BB	BB	BB	BB	AA	BB	AA	AA	BB	BB	BB	AA	-	-	AA	AA	BB	AA	BB	BB	BB	BB	BB	AA	BB	BB	AA	BB	-
1_8759962	1	31.2471025	BB	AA	BB	AA	BB	BB	AA	AA	BB	BB	BB	AA	BB	BB	AA	AA	AA	BB	BB	BB	BB	BB	AA	BB	AA	AA	BB	BB	BB	AA	-	-	AA	AA	BB	AA	BB	BB	BB	BB	BB	AA	BB	BB	AA	BB	-
1_8854649	1	31.24710255	-	-	-	-	-	-	-	-	-	-	-	-	-	-	-	-	-	-	-	-	-	-	-	-	-	-	-	-	-	-	-	-	-	-	-	-	-	-	-	-	-	-	-	-	-	-	-
1_8859579	1	31.2471026	-	-	-	-	-	-	-	-	-	-	-	-	-	-	-	-	-	-	-	-	-	-	-	-	-	-	-	-	-	-	-	-	-	-	-	-	-	-	-	-	-	-	-	-	-	-	-
1_8865772	1	31.24710265	BB	AA	BB	AA	BB	BB	AA	AA	BB	BB	BB	AA	BB	BB	AA	AA	AA	BB	BB	BB	BB	BB	AA	BB	AA	AA	BB	BB	BB	AA	-	-	AA	AA	BB	AA	BB	BB	BB	BB	BB	AA	BB	BB	AA	BB	-
1_8883916	1	31.2471027	BB	AA	BB	AA	BB	BB	AA	AA	BB	BB	BB	AA	BB	BB	AA	AA	AA	BB	BB	BB	BB	BB	AA	BB	AA	AA	BB	BB	BB	AA	-	-	AA	AA	BB	AA	BB	BB	BB	BB	BB	AA	BB	BB	AA	BB	-
1_8901679	1	31.74978179	BB	AA	BB	AA	BB	BB	AA	AA	BB	BB	BB	AA	BB	BB	AA	AA	AA	BB	BB	BB	BB	BB	AA	-	AA	AA	BB	BB	BB	AA	-	-	AA	AA	BB	AA	BB	BB	BB	BB	BB	AA	BB	BB	AA	BB	-
1_8919881	1	31.84028001	BB	AA	BB	AA	BB	BB	AA	AA	BB	BB	BB	AA	BB	BB	AA	AA	AA	BB	BB	BB	BB	BB	AA	-	AA	AA	BB	BB	BB	AA	-	-	AA	AA	BB	AA	BB	BB	BB	BB	BB	AA	BB	BB	AA	BB	-
1_8924159	1	31.84028006	BB	AA	BB	AA	BB	BB	AA	AA	BB	BB	BB	AA	BB	BB	AA	AA	AA	BB	BB	BB	BB	BB	AA	-	AA	AA	BB	BB	BB	AA	-	-	AA	AA	BB	AA	BB	BB	BB	BB	BB	AA	BB	BB	AA	BB	-
1_8927325	1	31.84028011	BB	AA	BB	AA	BB	BB	AA	AA	BB	BB	BB	AA	BB	BB	AA	AA	AA	BB	BB	BB	BB	BB	AA	-	AA	AA	BB	BB	BB	AA	-	-	AA	AA	BB	AA	BB	BB	BB	BB	BB	AA	BB	BB	AA	BB	-
1_8928533	1	31.84028016	BB	AA	BB	AA	BB	BB	AA	AA	BB	BB	BB	AA	BB	BB	AA	AA	AA	BB	BB	BB	BB	BB	AA	-	AA	AA	BB	BB	BB	AA	-	-	AA	AA	BB	AA	BB	BB	BB	BB	BB	AA	BB	BB	AA	BB	-
1_8931431	1	31.84028021	BB	AA	BB	AA	BB	BB	AA	AA	BB	BB	BB	AA	BB	BB	AA	AA	AA	BB	BB	BB	BB	BB	AA	-	AA	AA	BB	BB	BB	AA	-	-	AA	AA	BB	AA	BB	BB	BB	BB	BB	AA	BB	BB	AA	BB	-
1_8931566	1	31.84028026	BB	AA	BB	AA	BB	BB	AA	AA	BB	BB	BB	AA	BB	BB	AA	AA	AA	BB	BB	BB	BB	BB	AA	-	AA	AA	BB	BB	BB	AA	-	-	AA	AA	BB	AA	BB	BB	BB	BB	BB	AA	BB	BB	AA	BB	-
1_8934294	1	31.84028031	BB	AA	BB	AA	BB	BB	AA	AA	BB	BB	BB	AA	BB	BB	AA	AA	AA	BB	BB	BB	BB	BB	AA	AA	AA	AA	BB	BB	BB	AA	BB	-	AA	AA	BB	AA	BB	BB	BB	BB	BB	AA	BB	BB	AA	BB	-
1_8934939	1	31.84028036	BB	AA	BB	AA	BB	BB	AA	AA	BB	BB	BB	AA	BB	BB	AA	AA	AA	BB	BB	BB	BB	BB	AA	AA	AA	AA	BB	BB	BB	AA	BB	-	AA	AA	BB	AA	BB	BB	BB	BB	BB	AA	BB	BB	AA	BB	-
1_8936106	1	31.84028041	BB	AA	BB	AA	BB	BB	AA	AA	BB	BB	BB	AA	BB	BB	AA	AA	AA	BB	BB	BB	BB	BB	AA	AA	AA	AA	BB	BB	BB	AA	BB	-	AA	AA	BB	AA	BB	BB	BB	BB	BB	AA	BB	BB	AA	BB	-
1_8948668	1	31.84028046	BB	AA	BB	AA	BB	BB	AA	AA	BB	BB	BB	AA	BB	BB	AA	AA	AA	BB	BB	BB	BB	BB	AA	AA	AA	AA	BB	BB	BB	AA	BB	-	AA	AA	BB	AA	BB	BB	BB	BB	BB	AA	BB	BB	AA	BB	-
1_8954543	1	31.84028051	BB	AA	BB	AA	BB	BB	AA	AA	BB	BB	BB	AA	BB	BB	AA	AA	AA	BB	BB	BB	BB	BB	AA	AA	AA	AA	BB	BB	BB	AA	BB	-	AA	AA	BB	AA	BB	BB	BB	BB	BB	AA	BB	BB	AA	BB	-
1_8967394	1	31.84028056	BB	AA	BB	AA	BB	BB	AA	AA	BB	BB	BB	AA	BB	BB	AA	AA	AA	BB	BB	BB	BB	BB	AA	AA	AA	AA	BB	BB	BB	AA	BB	-	AA	AA	BB	AA	BB	BB	BB	BB	BB	AA	BB	BB	AA	BB	-
1_8974266	1	31.84028061	-	-	-	-	-	-	-	-	-	-	-	-	-	-	-	-	-	-	-	-	-	-	-	-	-	-	-	-	-	-	-	-	-	-	-	-	-	-	-	-	-	-	-	-	-	-	-
1_8985724	1	31.84028066	-	-	-	-	-	-	-	-	-	-	-	-	-	-	-	-	-	-	-	-	-	-	-	-	-	-	-	-	-	-	-	-	-	-	-	-	-	-	-	-	-	-	-	-	-	-	-
1_9002885	1	32.41105507	-	-	-	-	-	-	-	-	-	-	-	-	-	-	-	-	-	-	-	-	-	-	-	-	-	-	-	-	-	-	-	-	-	-	-	-	-	-	-	-	-	-	-	-	-	-	-
1_9019615	1	32.41105512	BB	AA	BB	AA	BB	BB	AA	AA	BB	BB	BB	AA	BB	BB	AA	AA	AA	BB	BB	BB	BB	BB	AA	AA	AA	AA	BB	BB	BB	AA	BB	-	AA	AA	BB	AA	BB	BB	BB	BB	BB	AA	BB	BB	AA	BB	-
1_9020827	1	32.41105517	BB	AA	BB	AA	BB	BB	AA	AA	BB	BB	BB	AA	BB	BB	AA	AA	AA	BB	BB	BB	BB	BB	AA	AA	AA	AA	BB	BB	BB	AA	BB	-	AA	AA	BB	AA	BB	BB	BB	BB	BB	AA	BB	BB	AA	BB	-
1_9061746	1	32.41105522	BB	AA	BB	AA	BB	BB	AA	AA	BB	BB	BB	AA	BB	BB	AA	AA	AA	BB	BB	BB	BB	BB	AA	AA	AA	AA	BB	BB	BB	AA	BB	-	AA	AA	BB	AA	BB	BB	BB	BB	BB	AA	BB	BB	AA	BB	-
1_9066126	1	32.41105527	BB	AA	BB	AA	BB	BB	AA	AA	BB	BB	BB	AA	BB	BB	AA	AA	AA	BB	BB	BB	BB	BB	AA	AA	AA	AA	BB	BB	BB	AA	BB	-	AA	AA	BB	AA	BB	BB	BB	BB	BB	AA	BB	BB	AA	BB	-
1_9082808	1	32.41105532	BB	AA	BB	AA	BB	BB	AA	AA	BB	BB	BB	AA	BB	BB	AA	AA	AA	BB	BB	BB	BB	BB	AA	AA	AA	AA	BB	BB	BB	AA	BB	-	AA	AA	BB	AA	BB	BB	BB	BB	BB	AA	BB	BB	AA	BB	-
1_9086410	1	32.41105537	BB	AA	BB	AA	BB	BB	AA	AA	BB	BB	BB	AA	BB	BB	AA	AA	AA	BB	BB	BB	BB	BB	AA	AA	AA	AA	BB	BB	BB	AA	BB	-	AA	AA	BB	AA	BB	BB	BB	BB	BB	AA	BB	BB	AA	BB	-
1_9090281	1	32.41105542	BB	AA	BB	AA	BB	BB	AA	AA	BB	BB	BB	AA	BB	BB	AA	AA	AA	BB	BB	BB	BB	BB	AA	AA	AA	AA	BB	BB	BB	AA	BB	-	AA	AA	BB	AA	BB	BB	BB	BB	BB	AA	BB	BB	AA	BB	-
1_9095493	1	32.41105547	BB	AA	BB	AA	BB	BB	AA	AA	BB	BB	BB	AA	BB	BB	AA	AA	AA	BB	BB	BB	BB	BB	-	AA	AA	AA	BB	BB	BB	AA	BB	-	AA	AA	BB	AA	BB	BB	BB	BB	-	AA	BB	BB	AA	BB	-
1_9099750	1	32.41105552	BB	AA	BB	AA	BB	BB	AA	AA	BB	BB	BB	AA	BB	BB	AA	AA	AA	BB	BB	BB	BB	BB	-	AA	AA	AA	BB	BB	BB	AA	BB	-	AA	AA	BB	AA	BB	BB	BB	BB	-	AA	BB	BB	AA	BB	-
1_9117257	1	33.01895461	BB	AA	BB	AA	BB	BB	AA	AA	BB	BB	BB	AA	BB	BB	AA	AA	AA	BB	BB	BB	BB	BB	-	AA	AA	AA	BB	BB	BB	AA	BB	-	AA	AA	BB	AA	BB	BB	BB	BB	-	AA	BB	BB	AA	BB	-
1_9117947	1	33.01895466	BB	AA	BB	AA	BB	BB	AA	AA	BB	BB	BB	AA	BB	BB	AA	AA	AA	BB	BB	BB	BB	BB	-	AA	AA	AA	BB	BB	BB	AA	BB	-	AA	AA	BB	AA	BB	BB	BB	BB	-	AA	BB	BB	AA	BB	-
1_9133519	1	33.01895471	BB	AA	BB	AA	BB	BB	AA	AA	BB	BB	BB	AA	BB	BB	AA	AA	AA	BB	BB	BB	BB	BB	-	AA	AA	AA	BB	BB	BB	AA	BB	-	AA	AA	BB	AA	BB	BB	BB	BB	-	AA	BB	BB	AA	BB	-
1_9139265	1	33.01895476	BB	AA	BB	AA	BB	BB	AA	AA	BB	BB	BB	AA	BB	BB	AA	AA	AA	BB	BB	BB	BB	BB	-	AA	AA	AA	BB	BB	BB	AA	BB	-	AA	AA	BB	AA	BB	BB	BB	BB	-	AA	BB	BB	AA	BB	-
1_9152328	1	33.01895481	BB	AA	BB	AA	BB	BB	AA	AA	BB	BB	BB	AA	BB	BB	AA	AA	AA	BB	BB	BB	BB	BB	-	AA	AA	AA	BB	BB	BB	AA	BB	-	AA	AA	BB	AA	BB	BB	BB	BB	-	AA	BB	BB	AA	BB	-
1_9165481	1	33.01895486	BB	AA	BB	AA	BB	BB	AA	AA	BB	BB	BB	AA	BB	BB	AA	AA	AA	BB	BB	BB	BB	BB	-	AA	AA	AA	BB	BB	BB	AA	BB	-	AA	AA	BB	AA	BB	BB	BB	BB	-	AA	BB	BB	AA	BB	-
1_9183469	1	33.01895491	-	-	-	-	-	-	-	-	-	-	-	-	-	-	-	-	-	-	-	-	-	-	-	-	-	-	-	-	-	-	-	-	-	-	-	-	-	-	-	-	-	-	-	-	-	-	-
1_9200178	1	33.01895496	BB	AA	BB	AA	BB	BB	AA	AA	BB	BB	BB	AA	BB	BB	AA	AA	AA	BB	BB	BB	BB	BB	-	AA	AA	AA	BB	BB	BB	AA	BB	-	AA	AA	BB	AA	BB	BB	BB	BB	-	AA	BB	BB	AA	BB	-
1_9242466	1	33.01895501	-	-	-	-	-	-	-	-	-	-	-	-	-	-	-	-	-	-	-	-	-	-	-	-	-	-	-	-	-	-	-	-	-	-	-	-	-	-	-	-	-	-	-	-	-	-	-
1_9246484	1	33.01895506	BB	AA	BB	AA	BB	BB	AA	AA	BB	BB	BB	AA	BB	BB	AA	AA	AA	BB	BB	BB	BB	BB	-	AA	AA	AA	BB	BB	BB	AA	BB	-	AA	AA	BB	AA	BB	BB	BB	BB	-	AA	BB	BB	AA	BB	-
1_9254129	1	33.01895511	-	-	-	-	-	-	-	-	-	-	-	-	-	-	-	-	-	-	-	-	-	-	-	-	-	-	-	-	-	-	-	-	-	-	-	-	-	-	-	-	-	-	-	-	-	-	-
1_9275017	1	33.01895516	-	-	-	-	-	-	-	-	-	-	-	-	-	-	-	-	-	-	-	-	-	-	-	-	-	-	-	-	-	-	-	-	-	-	-	-	-	-	-	-	-	-	-	-	-	-	-
1_9306742	1	33.86518883	-	-	-	-	-	-	-	-	-	-	-	-	-	-	-	-	-	-	-	-	-	-	-	-	-	-	-	-	-	-	-	-	-	-	-	-	-	-	-	-	-	-	-	-	-	-	-
1_9316910	1	33.86518888	-	-	-	-	-	-	-	-	-	-	-	-	-	-	-	-	-	-	-	-	-	-	-	-	-	-	-	-	-	-	-	-	-	-	-	-	-	-	-	-	-	-	-	-	-	-	-
1_9323103	1	33.86518893	BB	AA	BB	AA	BB	BB	AA	AA	BB	BB	BB	AA	BB	BB	AA	AA	AA	BB	BB	BB	BB	BB	-	AA	AA	AA	BB	BB	BB	AA	BB	-	AA	AA	BB	AA	BB	BB	BB	BB	-	AA	BB	BB	AA	BB	-
1_9350055	1	33.86518898	BB	AA	BB	AA	BB	BB	AA	AA	BB	BB	BB	AA	BB	BB	AA	AA	AA	BB	BB	BB	BB	BB	-	AA	AA	AA	BB	BB	BB	AA	BB	-	AA	AA	BB	AA	BB	BB	BB	BB	-	AA	BB	BB	AA	BB	-
1_9365937	1	33.86518903	-	-	-	-	-	-	-	-	-	-	-	-	-	-	-	-	-	-	-	-	-	-	-	-	-	-	-	-	-	-	-	-	-	-	-	-	-	-	-	-	-	-	-	-	-	-	-
1_9372823	1	33.86518908	BB	AA	BB	AA	BB	BB	AA	AA	BB	BB	BB	AA	BB	BB	AA	AA	AA	BB	BB	BB	BB	BB	-	AA	AA	AA	BB	BB	BB	AA	BB	-	AA	AA	BB	AA	BB	BB	BB	BB	-	AA	BB	BB	AA	BB	-
1_9373528	1	33.86518913	BB	AA	BB	AA	BB	BB	AA	AA	BB	BB	BB	AA	BB	BB	AA	AA	AA	BB	BB	BB	BB	BB	-	AA	AA	AA	BB	BB	BB	AA	BB	-	AA	AA	BB	AA	BB	BB	BB	BB	-	AA	BB	BB	AA	BB	-
1_9375801	1	33.86518918	-	-	-	-	-	-	-	-	-	-	-	-	-	-	-	-	-	-	-	-	-	-	-	-	-	-	-	-	-	-	-	-	-	-	-	-	-	-	-	-	-	-	-	-	-	-	-
1_9380965	1	33.86518923	BB	AA	BB	AA	BB	BB	AA	AA	BB	BB	BB	AA	BB	BB	AA	AA	AA	BB	BB	BB	BB	BB	-	AA	AA	AA	BB	BB	BB	AA	BB	-	AA	AA	BB	AA	BB	BB	BB	BB	-	AA	BB	BB	AA	BB	-
1_9393940	1	33.86518928	BB	AA	BB	AA	BB	BB	AA	AA	BB	BB	BB	AA	BB	BB	AA	AA	AA	BB	BB	BB	BB	BB	-	AA	AA	AA	BB	BB	BB	AA	BB	-	AA	AA	BB	AA	BB	BB	BB	BB	-	AA	BB	BB	AA	BB	-
1_9398466	1	33.86518933	-	-	-	-	-	-	-	-	-	-	-	-	-	-	-	-	-	-	-	-	-	-	-	-	-	-	-	-	-	-	-	-	-	-	-	-	-	-	-	-	-	-	-	-	-	-	-
1_9399019	1	33.86518938	-	-	-	-	-	-	-	-	-	-	-	-	-	-	-	-	-	-	-	-	-	-	-	-	-	-	-	-	-	-	-	-	-	-	-	-	-	-	-	-	-	-	-	-	-	-	-
1_9400429	1	33.86518943	-	-	-	-	-	-	-	-	-	-	-	-	-	-	-	-	-	-	-	-	-	-	-	-	-	-	-	-	-	-	-	-	-	-	-	-	-	-	-	-	-	-	-	-	-	-	-
1_9401357	1	33.86518948	BB	AA	BB	AA	BB	BB	AA	AA	BB	BB	BB	AA	BB	BB	AA	AA	AA	BB	BB	BB	BB	BB	-	AA	AA	AA	BB	BB	BB	AA	BB	-	AA	AA	BB	AA	BB	BB	BB	BB	-	AA	BB	BB	AA	BB	-
1_9405110	1	33.86518953	BB	AA	BB	AA	BB	BB	AA	AA	BB	BB	BB	AA	BB	BB	AA	AA	AA	BB	BB	BB	BB	BB	-	AA	AA	AA	BB	BB	BB	AA	BB	-	AA	AA	BB	AA	BB	BB	BB	BB	-	AA	BB	BB	AA	BB	-
1_9426408	1	33.86518958	BB	AA	BB	AA	BB	BB	AA	AA	BB	BB	BB	AA	BB	BB	AA	AA	AA	BB	BB	BB	BB	BB	-	AA	AA	AA	BB	BB	BB	AA	BB	-	AA	AA	BB	AA	BB	BB	BB	BB	-	AA	BB	BB	AA	BB	-
1_9434318	1	35.03365812	BB	AA	BB	AA	BB	BB	AA	AA	BB	BB	BB	AA	BB	BB	AA	AA	AA	BB	BB	BB	BB	BB	-	AA	AA	AA	BB	BB	BB	AA	BB	-	AA	AA	BB	AA	BB	BB	BB	BB	-	AA	BB	BB	AA	BB	-
1_9467216	1	35.03365817	BB	AA	BB	AA	BB	BB	AA	AA	BB	BB	BB	AA	BB	BB	AA	AA	AA	BB	BB	BB	BB	BB	-	AA	AA	AA	BB	BB	BB	AA	BB	-	AA	AA	BB	AA	BB	BB	BB	BB	-	AA	BB	BB	AA	BB	-
1_9476466	1	35.03365822	BB	AA	BB	AA	BB	BB	AA	AA	BB	BB	BB	AA	BB	BB	AA	AA	AA	BB	BB	BB	BB	BB	-	AA	AA	AA	BB	BB	BB	AA	BB	-	AA	AA	BB	AA	BB	BB	BB	BB	-	AA	BB	BB	AA	BB	-
1_9501125	1	35.03365827	BB	AA	BB	AA	BB	BB	AA	AA	BB	BB	BB	AA	BB	BB	AA	AA	AA	BB	BB	BB	BB	BB	-	AA	AA	AA	BB	BB	BB	AA	BB	-	AA	AA	BB	AA	BB	BB	BB	BB	-	AA	BB	BB	AA	BB	-
1_9511717	1	35.03365832	BB	AA	BB	AA	BB	BB	AA	AA	BB	BB	BB	AA	BB	BB	AA	AA	AA	BB	BB	BB	BB	BB	-	AA	AA	AA	BB	BB	BB	AA	BB	-	AA	AA	BB	AA	BB	BB	BB	BB	-	AA	BB	BB	AA	BB	-
1_9524754	1	35.03365837	BB	AA	BB	AA	BB	BB	AA	AA	BB	BB	BB	AA	BB	BB	AA	AA	AA	BB	BB	BB	BB	BB	BB	AA	AA	AA	BB	BB	BB	AA	BB	-	AA	AA	BB	AA	BB	BB	BB	BB	AA	AA	BB	BB	AA	BB	-
1_9526635	1	35.03365842	BB	AA	BB	AA	BB	BB	AA	AA	BB	BB	BB	AA	BB	BB	AA	AA	AA	BB	BB	BB	BB	BB	BB	AA	AA	AA	BB	BB	BB	AA	BB	-	AA	AA	BB	AA	BB	BB	BB	BB	AA	AA	BB	BB	AA	BB	-
1_9535760	1	35.03365847	BB	AA	BB	AA	BB	BB	AA	AA	BB	BB	BB	AA	BB	BB	AA	AA	AA	BB	BB	BB	BB	BB	BB	AA	AA	AA	BB	BB	BB	AA	BB	-	AA	AA	BB	AA	BB	BB	BB	BB	AA	AA	BB	BB	AA	BB	-
1_9579639	1	35.03365852	-	-	-	-	-	-	-	-	-	-	-	-	-	-	-	-	-	-	-	-	-	-	-	-	-	-	-	-	-	-	-	-	-	-	-	-	-	-	-	-	-	-	-	-	-	-	-
1_9580776	1	35.03365857	-	-	-	-	-	-	-	-	-	-	-	-	-	-	-	-	-	-	-	-	-	-	-	-	-	-	-	-	-	-	-	-	-	-	-	-	-	-	-	-	-	-	-	-	-	-	-
1_9581706	1	35.03365862	BB	AA	BB	AA	BB	BB	AA	AA	BB	BB	BB	AA	BB	BB	AA	AA	AA	BB	BB	BB	BB	BB	BB	AA	AA	AA	BB	BB	BB	AA	BB	-	AA	AA	BB	AA	BB	BB	BB	BB	AA	AA	BB	BB	AA	BB	-
1_9603018	1	35.03365867	BB	AA	BB	AA	BB	BB	AA	AA	BB	BB	BB	AA	BB	BB	AA	AA	AA	BB	BB	BB	BB	BB	BB	AA	AA	AA	BB	BB	BB	AA	BB	-	AA	AA	BB	AA	BB	BB	BB	BB	AA	AA	BB	BB	AA	BB	-
1_9621497	1	35.03365872	BB	AA	BB	AA	BB	BB	AA	AA	BB	BB	BB	AA	-	BB	AA	AA	AA	BB	BB	BB	BB	BB	BB	AA	AA	AA	BB	BB	BB	AA	BB	-	AA	AA	BB	AA	BB	BB	BB	BB	AA	AA	BB	BB	AA	BB	-
1_9626968	1	35.03365877	BB	AA	BB	AA	BB	BB	AA	AA	BB	BB	BB	AA	-	BB	AA	AA	AA	BB	BB	BB	BB	BB	BB	AA	AA	AA	BB	BB	BB	AA	BB	-	AA	AA	BB	AA	BB	BB	BB	BB	AA	AA	BB	BB	AA	BB	-
1_9630286	1	35.03365882	BB	AA	BB	AA	BB	BB	AA	AA	BB	BB	BB	AA	-	BB	AA	AA	AA	BB	BB	BB	BB	BB	BB	AA	AA	AA	BB	BB	BB	AA	BB	-	AA	AA	BB	AA	BB	BB	BB	BB	AA	AA	BB	BB	AA	BB	-
1_9631044	1	35.03365887	BB	AA	BB	AA	BB	BB	AA	AA	BB	BB	BB	AA	-	BB	AA	AA	AA	BB	BB	BB	BB	BB	BB	AA	AA	AA	BB	BB	BB	AA	BB	-	AA	AA	BB	AA	BB	BB	BB	BB	AA	AA	BB	BB	AA	BB	-
1_9707546	1	35.03365892	BB	AA	BB	AA	BB	BB	AA	AA	BB	BB	BB	AA	-	BB	AA	AA	AA	BB	BB	BB	BB	BB	BB	AA	AA	AA	BB	BB	BB	AA	BB	-	AA	AA	BB	AA	BB	BB	BB	BB	AA	AA	BB	BB	AA	BB	-
1_9708522	1	35.03365897	BB	AA	BB	AA	BB	BB	AA	AA	BB	BB	BB	AA	-	BB	AA	AA	AA	BB	BB	BB	BB	BB	BB	AA	AA	AA	BB	BB	BB	AA	BB	-	AA	AA	BB	AA	BB	BB	BB	BB	AA	AA	BB	BB	AA	BB	-
1_9727131	1	35.03365902	-	-	-	-	-	-	-	-	-	-	-	-	-	-	-	-	-	-	-	-	-	-	-	-	-	-	-	-	-	-	-	-	-	-	-	-	-	-	-	-	-	-	-	-	-	-	-
1_9744101	1	35.03365907	BB	AA	BB	AA	BB	BB	AA	AA	BB	BB	BB	AA	-	BB	AA	AA	AA	BB	BB	BB	BB	BB	BB	AA	AA	AA	BB	BB	BB	AA	BB	-	AA	AA	BB	AA	BB	BB	BB	BB	AA	AA	BB	BB	AA	BB	-
1_9759932	1	35.03365912	BB	AA	BB	AA	BB	BB	AA	AA	BB	BB	BB	AA	-	BB	AA	AA	AA	BB	BB	BB	BB	BB	BB	AA	AA	AA	BB	BB	BB	AA	BB	-	AA	AA	BB	AA	BB	BB	BB	BB	AA	AA	BB	BB	AA	BB	-
1_9762662	1	35.03365917	BB	AA	BB	AA	BB	BB	AA	AA	BB	BB	BB	AA	-	BB	AA	AA	AA	BB	BB	BB	BB	BB	BB	AA	AA	AA	BB	BB	BB	AA	BB	-	AA	AA	BB	AA	BB	BB	BB	BB	AA	AA	BB	BB	AA	BB	-
1_9776148	1	35.03365922	BB	AA	BB	AA	BB	BB	AA	AA	BB	BB	BB	AA	-	BB	AA	AA	AA	BB	BB	BB	BB	BB	BB	AA	AA	AA	BB	BB	BB	AA	BB	-	AA	AA	BB	AA	BB	BB	BB	BB	AA	AA	BB	BB	AA	BB	-
1_9777929	1	35.03365927	BB	AA	BB	AA	BB	BB	AA	AA	BB	BB	BB	AA	-	BB	AA	AA	AA	BB	BB	BB	BB	BB	BB	AA	AA	AA	BB	BB	BB	AA	BB	-	AA	AA	BB	AA	BB	BB	BB	BB	AA	AA	BB	BB	AA	BB	-
1_9777984	1	35.03365932	-	-	-	-	-	-	-	-	-	-	-	-	-	-	-	-	-	-	-	-	-	-	-	-	-	-	-	-	-	-	-	-	-	-	-	-	-	-	-	-	-	-	-	-	-	-	-
1_9778755	1	35.03365937	BB	AA	BB	AA	BB	BB	AA	AA	BB	BB	BB	AA	-	BB	AA	AA	AA	BB	BB	BB	BB	BB	BB	AA	AA	AA	BB	BB	BB	AA	BB	-	AA	AA	BB	AA	BB	BB	BB	BB	AA	AA	BB	BB	AA	BB	-
1_9780816	1	35.03365942	BB	AA	BB	AA	BB	BB	AA	AA	BB	BB	BB	AA	-	BB	AA	AA	AA	BB	BB	BB	BB	BB	BB	AA	AA	AA	BB	BB	BB	AA	BB	-	AA	AA	BB	AA	BB	BB	BB	BB	AA	AA	BB	BB	AA	BB	-
1_9783301	1	36.45427787	-	-	-	-	-	-	-	-	-	-	-	-	-	-	-	-	-	-	-	-	-	-	-	-	-	-	-	-	-	-	-	-	-	-	-	-	-	-	-	-	-	-	-	-	-	-	-
1_9784072	1	36.45427792	BB	AA	BB	AA	BB	BB	AA	AA	BB	BB	BB	AA	-	BB	AA	AA	AA	BB	BB	BB	BB	BB	BB	AA	AA	AA	BB	BB	BB	AA	BB	-	AA	AA	BB	AA	BB	BB	BB	BB	AA	AA	BB	BB	AA	BB	-
1_9794474	1	36.45427797	BB	AA	BB	AA	BB	BB	AA	AA	BB	BB	BB	AA	-	BB	AA	AA	AA	BB	BB	BB	BB	BB	BB	AA	AA	AA	BB	BB	BB	AA	BB	-	AA	AA	BB	AA	BB	BB	BB	BB	AA	AA	BB	BB	AA	BB	-
1_9809441	1	36.45427802	-	-	-	-	-	-	-	-	-	-	-	-	-	-	-	-	-	-	-	-	-	-	-	-	-	-	-	-	-	-	-	-	-	-	-	-	-	-	-	-	-	-	-	-	-	-	-
1_9812917	1	36.45427807	BB	AA	BB	AA	BB	BB	AA	AA	BB	BB	BB	AA	-	BB	AA	AA	AA	BB	BB	BB	BB	BB	BB	AA	AA	AA	BB	BB	BB	AA	BB	-	AA	AA	BB	AA	BB	BB	BB	BB	AA	AA	BB	BB	AA	BB	-
1_9830076	1	36.45427812	BB	AA	BB	AA	BB	BB	AA	AA	BB	BB	BB	AA	-	BB	AA	AA	AA	BB	BB	BB	BB	BB	BB	AA	AA	AA	BB	BB	BB	AA	BB	-	AA	AA	BB	AA	BB	BB	BB	BB	AA	AA	BB	BB	AA	BB	-
1_9835158	1	36.45427817	BB	AA	BB	AA	BB	BB	AA	AA	BB	BB	BB	AA	-	BB	AA	AA	AA	BB	BB	BB	BB	BB	BB	AA	AA	AA	BB	BB	BB	AA	BB	-	AA	AA	BB	AA	BB	BB	BB	BB	AA	AA	BB	BB	AA	BB	-
1_9871467	1	36.45427822	BB	AA	BB	AA	BB	BB	AA	AA	BB	BB	BB	AA	-	BB	AA	AA	AA	BB	BB	BB	BB	BB	BB	AA	AA	AA	BB	BB	BB	AA	BB	-	AA	AA	BB	AA	BB	BB	BB	BB	AA	AA	BB	BB	AA	BB	-
1_9884388	1	36.45427827	-	-	-	-	-	-	-	-	-	-	-	-	-	-	-	-	-	-	-	-	-	-	-	-	-	-	-	-	-	-	-	-	-	-	-	-	-	-	-	-	-	-	-	-	-	-	-
1_9904980	1	36.45427832	BB	AA	BB	AA	BB	BB	AA	AA	BB	BB	BB	AA	-	BB	AA	AA	AA	BB	BB	BB	BB	BB	BB	AA	AA	AA	BB	BB	BB	AA	BB	-	AA	AA	BB	AA	BB	BB	BB	BB	AA	AA	BB	BB	AA	BB	-
1_9905928	1	36.45427837	BB	AA	BB	AA	BB	BB	AA	AA	BB	BB	BB	AA	-	BB	AA	AA	AA	BB	BB	BB	BB	BB	BB	AA	AA	AA	BB	BB	BB	AA	BB	-	AA	AA	BB	AA	BB	BB	BB	BB	AA	AA	BB	BB	AA	BB	-
1_9915825	1	36.45427842	BB	AA	BB	AA	BB	BB	AA	AA	BB	BB	BB	AA	-	BB	AA	AA	AA	BB	BB	BB	BB	BB	BB	AA	AA	AA	BB	BB	BB	AA	BB	-	AA	AA	BB	AA	BB	BB	BB	BB	AA	AA	BB	BB	AA	BB	-
1_9919346	1	36.45427847	-	-	-	-	-	-	-	-	-	-	-	-	-	-	-	-	-	-	-	-	-	-	-	-	-	-	-	-	-	-	-	-	-	-	-	-	-	-	-	-	-	-	-	-	-	-	-
1_9946991	1	36.45427852	-	-	-	-	-	-	-	-	-	-	-	-	-	-	-	-	-	-	-	-	-	-	-	-	-	-	-	-	-	-	-	-	-	-	-	-	-	-	-	-	-	-	-	-	-	-	-
1_9960737	1	36.45427857	BB	AA	BB	AA	BB	BB	AA	AA	BB	BB	BB	AA	-	BB	AA	AA	AA	BB	BB	BB	BB	BB	BB	AA	AA	AA	BB	BB	BB	AA	BB	-	AA	AA	BB	AA	BB	BB	BB	BB	AA	AA	BB	BB	AA	BB	-
1_9969869	1	36.45427862	BB	AA	BB	AA	BB	BB	AA	AA	BB	BB	BB	AA	-	BB	AA	AA	AA	BB	BB	BB	BB	BB	BB	AA	AA	AA	BB	BB	BB	AA	BB	-	AA	AA	BB	AA	BB	BB	BB	BB	AA	AA	BB	BB	AA	BB	-
1_9991731	1	36.45427867	BB	AA	BB	AA	BB	BB	AA	AA	BB	BB	BB	AA	-	BB	AA	AA	AA	BB	BB	BB	BB	BB	BB	AA	AA	AA	BB	BB	BB	AA	BB	-	AA	AA	BB	AA	BB	BB	BB	BB	AA	AA	BB	BB	AA	BB	-
1_10001699	1	36.45427872	-	-	-	-	-	-	-	-	-	-	-	-	-	-	-	-	-	-	-	-	-	-	-	-	-	-	-	-	-	-	-	-	-	-	-	-	-	-	-	-	-	-	-	-	-	-	-
1_10014780	1	36.45427877	BB	AA	BB	AA	BB	BB	AA	AA	BB	BB	BB	AA	-	BB	AA	AA	AA	BB	BB	BB	BB	BB	BB	AA	AA	AA	BB	BB	BB	AA	BB	-	AA	AA	BB	AA	BB	BB	BB	BB	AA	AA	BB	BB	AA	BB	-
1_10015247	1	36.45427882	BB	AA	BB	AA	BB	BB	AA	AA	BB	BB	BB	AA	-	BB	AA	AA	AA	BB	BB	BB	BB	BB	BB	AA	AA	AA	BB	BB	BB	AA	BB	-	AA	AA	BB	AA	BB	BB	BB	BB	AA	AA	BB	BB	AA	BB	-
1_10015388	1	36.45427887	BB	AA	BB	AA	BB	BB	AA	AA	BB	BB	BB	AA	-	BB	AA	AA	AA	BB	BB	BB	BB	BB	BB	AA	AA	AA	BB	BB	BB	AA	BB	-	AA	AA	BB	AA	BB	BB	BB	BB	AA	AA	BB	BB	AA	BB	-
1_10045695	1	36.45427892	BB	AA	BB	AA	BB	BB	AA	AA	BB	BB	BB	AA	-	BB	AA	AA	AA	BB	BB	BB	BB	BB	BB	AA	AA	AA	BB	BB	BB	AA	BB	-	AA	AA	BB	AA	BB	BB	BB	BB	AA	AA	BB	BB	AA	BB	-
1_10046867	1	36.45427897	-	-	-	-	-	-	-	-	-	-	-	-	-	-	-	-	-	-	-	-	-	-	-	-	-	-	-	-	-	-	-	-	-	-	-	-	-	-	-	-	-	-	-	-	-	-	-
1_10075574	1	37.05112597	-	-	-	-	-	-	-	-	-	-	-	-	-	-	-	-	-	-	-	-	-	-	-	-	-	-	-	-	-	-	-	-	-	-	-	-	-	-	-	-	-	-	-	-	-	-	-
1_10081934	1	37.05112602	-	-	-	-	-	-	-	-	-	-	-	-	-	-	-	-	-	-	-	-	-	-	-	-	-	-	-	-	-	-	-	-	-	-	-	-	-	-	-	-	-	-	-	-	-	-	-
1_10082340	1	37.05112607	-	-	-	-	-	-	-	-	-	-	-	-	-	-	-	-	-	-	-	-	-	-	-	-	-	-	-	-	-	-	-	-	-	-	-	-	-	-	-	-	-	-	-	-	-	-	-
1_10120050	1	37.05112612	BB	AA	BB	AA	BB	BB	AA	AA	BB	BB	BB	AA	-	BB	AA	AA	AA	BB	BB	BB	BB	BB	BB	AA	AA	AA	BB	BB	BB	AA	BB	-	AA	AA	BB	AA	BB	BB	BB	BB	AA	AA	BB	BB	AA	BB	-
1_10120310	1	37.05112617	BB	AA	BB	AA	BB	BB	AA	AA	BB	BB	BB	AA	-	BB	AA	AA	AA	BB	BB	BB	BB	BB	BB	AA	AA	AA	BB	BB	BB	AA	BB	-	AA	AA	BB	AA	BB	BB	BB	BB	AA	AA	BB	BB	AA	BB	-
1_10128981	1	37.05112622	BB	AA	BB	AA	BB	BB	AA	AA	BB	BB	BB	AA	-	BB	AA	AA	AA	BB	BB	BB	BB	BB	BB	AA	AA	AA	BB	BB	BB	AA	BB	-	AA	AA	BB	AA	BB	BB	BB	BB	AA	AA	BB	BB	AA	BB	-
1_10150969	1	37.05112627	-	-	-	-	-	-	-	-	-	-	-	-	-	-	-	-	-	-	-	-	-	-	-	-	-	-	-	-	-	-	-	-	-	-	-	-	-	-	-	-	-	-	-	-	-	-	-
1_10151355	1	37.05112632	-	-	-	-	-	-	-	-	-	-	-	-	-	-	-	-	-	-	-	-	-	-	-	-	-	-	-	-	-	-	-	-	-	-	-	-	-	-	-	-	-	-	-	-	-	-	-
1_10151802	1	37.05112637	BB	AA	BB	AA	BB	BB	AA	AA	BB	BB	BB	AA	-	BB	AA	AA	AA	BB	BB	BB	BB	BB	BB	AA	AA	AA	BB	BB	BB	AA	BB	-	AA	AA	BB	AA	BB	BB	BB	BB	AA	AA	BB	BB	AA	BB	-
1_10158240	1	37.05112642	BB	AA	BB	AA	BB	BB	AA	AA	BB	BB	BB	AA	-	BB	AA	AA	AA	BB	BB	BB	BB	BB	BB	AA	AA	AA	BB	BB	BB	AA	BB	-	AA	AA	BB	AA	BB	BB	BB	BB	AA	AA	BB	BB	AA	BB	-
1_10158889	1	37.05112647	BB	AA	BB	AA	BB	BB	AA	AA	BB	BB	BB	AA	-	BB	AA	AA	AA	BB	BB	BB	BB	BB	BB	AA	AA	AA	BB	BB	BB	AA	BB	-	AA	AA	BB	AA	BB	BB	BB	BB	AA	AA	BB	BB	AA	BB	-
1_10171691	1	37.05112652	BB	AA	BB	AA	BB	BB	AA	AA	BB	BB	BB	AA	-	BB	AA	AA	AA	BB	BB	BB	BB	BB	BB	AA	AA	AA	BB	BB	BB	AA	BB	-	AA	AA	BB	AA	BB	BB	BB	BB	AA	AA	BB	BB	AA	BB	-
1_10173480	1	37.05112657	BB	AA	BB	AA	BB	BB	AA	AA	BB	BB	BB	AA	-	BB	AA	AA	AA	BB	BB	BB	BB	BB	BB	AA	AA	AA	BB	BB	BB	AA	BB	-	AA	AA	BB	AA	BB	BB	BB	BB	AA	AA	BB	BB	AA	BB	-
1_10201538	1	38.15752604	BB	AA	BB	AA	BB	-	AA	AA	BB	BB	BB	AA	-	BB	AA	AA	AA	BB	BB	BB	BB	BB	BB	AA	AA	AA	BB	BB	BB	AA	BB	-	AA	AA	BB	AA	BB	BB	BB	BB	AA	AA	BB	BB	AA	BB	-
1_10201589	1	38.15752609	BB	AA	BB	AA	BB	-	AA	AA	BB	BB	BB	AA	-	BB	AA	AA	AA	BB	BB	BB	BB	BB	BB	AA	AA	AA	BB	BB	BB	AA	BB	-	AA	AA	BB	AA	BB	BB	BB	BB	AA	AA	BB	BB	AA	BB	-
1_10202841	1	38.15752614	BB	AA	BB	AA	BB	-	AA	AA	BB	BB	BB	AA	-	BB	AA	AA	AA	BB	BB	BB	BB	BB	BB	AA	AA	AA	BB	BB	BB	AA	BB	-	AA	AA	BB	AA	BB	BB	BB	BB	AA	AA	BB	BB	AA	BB	-
1_10234062	1	38.15752619	BB	AA	BB	AA	BB	-	AA	AA	BB	BB	BB	AA	-	BB	AA	AA	AA	BB	BB	BB	BB	BB	BB	AA	AA	AA	BB	BB	BB	AA	BB	-	AA	AA	BB	AA	BB	BB	BB	BB	AA	AA	BB	BB	AA	BB	-
1_10243185	1	38.15752624	-	-	-	-	-	-	-	-	-	-	-	-	-	-	-	-	-	-	-	-	-	-	-	-	-	-	-	-	-	-	-	-	-	-	-	-	-	-	-	-	-	-	-	-	-	-	-
1_10247348	1	38.15752629	BB	AA	BB	AA	BB	-	AA	AA	BB	BB	BB	AA	-	BB	AA	AA	AA	BB	BB	BB	BB	BB	BB	AA	AA	AA	BB	BB	BB	AA	BB	-	AA	AA	BB	AA	BB	BB	BB	BB	AA	AA	BB	BB	AA	BB	-
1_10261745	1	38.15752634	BB	AA	BB	AA	BB	-	AA	AA	BB	BB	BB	AA	-	BB	AA	AA	AA	BB	BB	BB	BB	BB	BB	AA	AA	AA	BB	BB	BB	AA	BB	-	AA	AA	BB	AA	BB	BB	BB	BB	AA	AA	BB	BB	AA	BB	-
1_10273992	1	38.15752639	BB	AA	BB	AA	BB	-	AA	AA	BB	BB	BB	AA	-	BB	AA	AA	AA	BB	BB	BB	BB	BB	BB	AA	AA	AA	BB	BB	BB	AA	BB	-	AA	AA	BB	AA	BB	BB	BB	BB	AA	AA	BB	BB	AA	BB	-
1_10277615	1	38.15752644	BB	AA	BB	AA	BB	-	AA	AA	BB	BB	BB	AA	-	BB	AA	AA	AA	BB	BB	BB	BB	BB	BB	AA	AA	AA	BB	BB	BB	AA	BB	-	AA	AA	BB	AA	BB	BB	BB	BB	AA	AA	BB	BB	AA	BB	-
1_10298521	1	38.15752649	BB	AA	BB	AA	BB	-	AA	AA	BB	BB	BB	AA	-	BB	AA	AA	AA	BB	BB	BB	BB	BB	BB	AA	AA	AA	BB	BB	BB	AA	BB	-	AA	AA	BB	AA	BB	BB	BB	BB	AA	AA	BB	BB	AA	BB	-
1_10314189	1	38.15752654	BB	AA	BB	AA	BB	AA	AA	AA	BB	BB	BB	AA	AA	BB	AA	AA	AA	BB	BB	BB	BB	BB	BB	AA	AA	AA	BB	BB	BB	AA	BB	BB	AA	AA	BB	AA	BB	BB	BB	BB	AA	AA	BB	BB	AA	BB	-
1_10327770	1	38.15752659	BB	AA	BB	AA	BB	AA	AA	AA	BB	BB	BB	AA	AA	BB	AA	AA	AA	BB	BB	BB	BB	BB	BB	AA	AA	AA	BB	BB	BB	AA	BB	BB	AA	AA	BB	AA	BB	BB	BB	BB	AA	AA	BB	BB	AA	BB	-
1_10338532	1	38.15752664	BB	AA	BB	AA	BB	AA	AA	AA	BB	BB	BB	AA	AA	BB	AA	AA	AA	BB	BB	BB	BB	BB	BB	AA	AA	AA	BB	BB	BB	AA	BB	BB	AA	AA	BB	AA	BB	BB	BB	BB	AA	AA	BB	BB	AA	BB	-
1_10341567	1	38.15752669	BB	AA	BB	AA	BB	AA	AA	AA	BB	BB	BB	AA	AA	BB	AA	AA	AA	BB	BB	BB	BB	BB	BB	AA	AA	AA	BB	BB	BB	AA	BB	BB	AA	AA	BB	AA	BB	BB	BB	BB	AA	AA	BB	BB	AA	BB	-
1_10343549	1	38.15752674	BB	AA	BB	AA	BB	AA	AA	AA	BB	BB	BB	AA	AA	BB	AA	AA	AA	BB	BB	BB	BB	BB	BB	AA	AA	AA	BB	BB	BB	AA	BB	BB	AA	AA	BB	AA	BB	BB	BB	BB	AA	AA	BB	BB	AA	BB	-
1_10358860	1	38.15752679	BB	AA	BB	AA	BB	AA	AA	AA	BB	BB	BB	AA	AA	BB	AA	AA	AA	BB	BB	BB	BB	BB	BB	AA	AA	AA	BB	BB	BB	AA	BB	BB	AA	AA	BB	AA	BB	BB	BB	BB	AA	AA	BB	BB	AA	BB	-
1_10362170	1	38.15752684	BB	AA	BB	AA	BB	AA	AA	AA	BB	BB	BB	AA	AA	BB	AA	AA	AA	BB	BB	BB	BB	BB	BB	AA	AA	AA	BB	BB	BB	AA	BB	BB	AA	AA	BB	AA	BB	BB	BB	BB	AA	AA	BB	BB	AA	BB	-
1_10373116	1	38.15752689	-	-	-	-	-	-	-	-	-	-	-	-	-	-	-	-	-	-	-	-	-	-	-	-	-	-	-	-	-	-	-	-	-	-	-	-	-	-	-	-	-	-	-	-	-	-	-
1_10376488	1	38.15752694	-	-	-	-	-	-	-	-	-	-	-	-	-	-	-	-	-	-	-	-	-	-	-	-	-	-	-	-	-	-	-	-	-	-	-	-	-	-	-	-	-	-	-	-	-	-	-
1_10395973	1	38.15752699	-	-	-	-	-	-	-	-	-	-	-	-	-	-	-	-	-	-	-	-	-	-	-	-	-	-	-	-	-	-	-	-	-	-	-	-	-	-	-	-	-	-	-	-	-	-	-
1_10396832	1	38.15752704	-	-	-	-	-	-	-	-	-	-	-	-	-	-	-	-	-	-	-	-	-	-	-	-	-	-	-	-	-	-	-	-	-	-	-	-	-	-	-	-	-	-	-	-	-	-	-
1_10400305	1	38.15752709	-	-	-	-	-	-	-	-	-	-	-	-	-	-	-	-	-	-	-	-	-	-	-	-	-	-	-	-	-	-	-	-	-	-	-	-	-	-	-	-	-	-	-	-	-	-	-
1_10411644	1	38.15752714	BB	AA	BB	AA	BB	AA	AA	AA	BB	BB	BB	AA	AA	BB	AA	AA	AA	BB	BB	BB	BB	BB	BB	AA	AA	AA	BB	BB	BB	AA	BB	BB	AA	AA	BB	AA	BB	BB	BB	BB	AA	AA	BB	BB	AA	BB	-
1_10413189	1	38.15752719	-	-	-	-	-	-	-	-	-	-	-	-	-	-	-	-	-	-	-	-	-	-	-	-	-	-	-	-	-	-	-	-	-	-	-	-	-	-	-	-	-	-	-	-	-	-	-
1_10413241	1	38.15752724	-	-	-	-	-	-	-	-	-	-	-	-	-	-	-	-	-	-	-	-	-	-	-	-	-	-	-	-	-	-	-	-	-	-	-	-	-	-	-	-	-	-	-	-	-	-	-
1_10415126	1	38.15752729	-	-	-	-	-	-	-	-	-	-	-	-	-	-	-	-	-	-	-	-	-	-	-	-	-	-	-	-	-	-	-	-	-	-	-	-	-	-	-	-	-	-	-	-	-	-	-
1_10416694	1	38.15752734	-	-	-	-	-	-	-	-	-	-	-	-	-	-	-	-	-	-	-	-	-	-	-	-	-	-	-	-	-	-	-	-	-	-	-	-	-	-	-	-	-	-	-	-	-	-	-
1_10417164	1	38.15752739	-	-	-	-	-	-	-	-	-	-	-	-	-	-	-	-	-	-	-	-	-	-	-	-	-	-	-	-	-	-	-	-	-	-	-	-	-	-	-	-	-	-	-	-	-	-	-
1_10418656	1	38.15752744	-	-	-	-	-	-	-	-	-	-	-	-	-	-	-	-	-	-	-	-	-	-	-	-	-	-	-	-	-	-	-	-	-	-	-	-	-	-	-	-	-	-	-	-	-	-	-
1_10425438	1	38.15752749	-	-	-	-	-	-	-	-	-	-	-	-	-	-	-	-	-	-	-	-	-	-	-	-	-	-	-	-	-	-	-	-	-	-	-	-	-	-	-	-	-	-	-	-	-	-	-
1_10429702	1	38.15752754	-	-	-	-	-	-	-	-	-	-	-	-	-	-	-	-	-	-	-	-	-	-	-	-	-	-	-	-	-	-	-	-	-	-	-	-	-	-	-	-	-	-	-	-	-	-	-
1_10449961	1	38.15752759	-	-	-	-	-	-	-	-	-	-	-	-	-	-	-	-	-	-	-	-	-	-	-	-	-	-	-	-	-	-	-	-	-	-	-	-	-	-	-	-	-	-	-	-	-	-	-
1_10452887	1	38.15752764	-	-	-	-	-	-	-	-	-	-	-	-	-	-	-	-	-	-	-	-	-	-	-	-	-	-	-	-	-	-	-	-	-	-	-	-	-	-	-	-	-	-	-	-	-	-	-
1_10457607	1	38.15752769	-	-	-	-	-	-	-	-	-	-	-	-	-	-	-	-	-	-	-	-	-	-	-	-	-	-	-	-	-	-	-	-	-	-	-	-	-	-	-	-	-	-	-	-	-	-	-
1_10458501	1	38.15752774	-	-	-	-	-	-	-	-	-	-	-	-	-	-	-	-	-	-	-	-	-	-	-	-	-	-	-	-	-	-	-	-	-	-	-	-	-	-	-	-	-	-	-	-	-	-	-
1_10477298	1	38.15752779	BB	AA	BB	AA	BB	AA	AA	AA	BB	BB	BB	AA	AA	BB	AA	AA	AA	BB	BB	BB	BB	BB	BB	AA	AA	AA	BB	BB	BB	AA	BB	BB	AA	AA	BB	AA	BB	BB	BB	BB	AA	AA	BB	BB	AA	BB	-
1_10483599	1	38.15752784	BB	AA	BB	AA	BB	AA	AA	AA	BB	BB	BB	AA	AA	BB	AA	AA	AA	BB	BB	BB	BB	BB	BB	AA	AA	AA	BB	BB	BB	AA	BB	BB	AA	AA	BB	AA	BB	BB	BB	BB	AA	AA	BB	BB	AA	BB	-
1_10494547	1	38.15752789	BB	AA	BB	AA	BB	AA	AA	AA	BB	BB	BB	AA	AA	BB	AA	AA	AA	BB	BB	BB	BB	BB	BB	AA	AA	AA	BB	BB	BB	AA	BB	BB	AA	AA	BB	AA	BB	BB	BB	BB	AA	AA	BB	BB	AA	BB	-
1_10502406	1	38.45162087	BB	AA	BB	AA	BB	AA	AA	AA	BB	BB	BB	AA	AA	BB	AA	AA	AA	BB	BB	BB	BB	BB	BB	AA	AA	AA	BB	BB	BB	AA	BB	BB	AA	AA	BB	AA	BB	BB	BB	BB	AA	AA	BB	BB	AA	BB	-
1_10515676	1	38.45162092	BB	AA	BB	AA	BB	AA	AA	AA	BB	BB	BB	AA	AA	BB	AA	AA	AA	BB	BB	BB	BB	BB	BB	AA	AA	AA	BB	BB	BB	AA	BB	BB	AA	AA	BB	AA	BB	BB	BB	BB	AA	AA	BB	BB	AA	BB	-
1_10516888	1	38.45162097	BB	AA	BB	AA	BB	AA	AA	AA	BB	BB	BB	AA	AA	BB	AA	AA	AA	BB	BB	BB	BB	BB	BB	AA	AA	AA	BB	BB	BB	AA	BB	BB	AA	AA	BB	AA	BB	BB	BB	BB	AA	AA	BB	BB	AA	BB	-
1_10552152	1	38.45162102	BB	AA	BB	AA	BB	AA	AA	AA	BB	BB	BB	AA	AA	BB	AA	AA	AA	BB	BB	BB	BB	BB	BB	AA	AA	AA	BB	BB	BB	AA	BB	BB	AA	AA	BB	AA	BB	BB	BB	BB	AA	AA	BB	BB	AA	BB	-
1_10553992	1	38.45162107	-	-	-	-	-	-	-	-	-	-	-	-	-	-	-	-	-	-	-	-	-	-	-	-	-	-	-	-	-	-	-	-	-	-	-	-	-	-	-	-	-	-	-	-	-	-	-
1_10556749	1	38.45162112	-	-	-	-	-	-	-	-	-	-	-	-	-	-	-	-	-	-	-	-	-	-	-	-	-	-	-	-	-	-	-	-	-	-	-	-	-	-	-	-	-	-	-	-	-	-	-
1_10577361	1	38.96403693	-	-	-	-	-	-	-	-	-	-	-	-	-	-	-	-	-	-	-	-	-	-	-	-	-	-	-	-	-	-	-	-	-	-	-	-	-	-	-	-	-	-	-	-	-	-	-
1_10606465	1	38.96403698	BB	AA	BB	AA	BB	AA	AA	AA	BB	BB	BB	AA	AA	BB	AA	AA	AA	BB	BB	BB	BB	BB	BB	AA	AA	AA	BB	BB	BB	AA	BB	BB	AA	AA	BB	AA	BB	BB	BB	BB	AA	AA	BB	BB	AA	BB	-
1_10606987	1	38.96403703	BB	AA	BB	AA	BB	AA	AA	AA	BB	BB	BB	AA	AA	BB	AA	AA	AA	BB	BB	BB	BB	BB	BB	AA	AA	AA	BB	BB	BB	AA	BB	BB	AA	AA	BB	AA	BB	BB	BB	BB	AA	AA	BB	BB	AA	BB	-
1_10646613	1	38.96403708	BB	AA	BB	AA	BB	AA	AA	AA	BB	BB	BB	AA	AA	BB	AA	AA	AA	BB	BB	BB	BB	BB	BB	AA	AA	AA	BB	BB	BB	AA	BB	BB	AA	AA	BB	AA	BB	BB	BB	BB	AA	AA	BB	BB	AA	BB	-
1_10665073	1	38.96403713	-	-	-	-	-	-	-	-	-	-	-	-	-	-	-	-	-	-	-	-	-	-	-	-	-	-	-	-	-	-	-	-	-	-	-	-	-	-	-	-	-	-	-	-	-	-	-
1_10667038	1	38.96403718	BB	AA	BB	AA	BB	AA	AA	AA	BB	BB	BB	AA	AA	BB	AA	AA	AA	BB	BB	BB	BB	BB	BB	AA	AA	AA	BB	BB	BB	AA	BB	BB	AA	AA	BB	AA	BB	BB	BB	BB	AA	AA	BB	BB	AA	BB	-
1_10684265	1	38.96403723	BB	AA	BB	AA	BB	AA	AA	AA	BB	BB	BB	AA	AA	BB	AA	AA	AA	BB	BB	BB	BB	BB	BB	AA	AA	AA	BB	BB	BB	AA	BB	BB	AA	AA	BB	AA	BB	BB	BB	BB	AA	AA	BB	BB	AA	BB	-
1_10722153	1	38.96403728	-	-	-	-	-	-	-	-	-	-	-	-	-	-	-	-	-	-	-	-	-	-	-	-	-	-	-	-	-	-	-	-	-	-	-	-	-	-	-	-	-	-	-	-	-	-	-
1_10723772	1	38.96403733	BB	AA	BB	AA	BB	AA	AA	AA	BB	BB	BB	AA	AA	BB	AA	AA	AA	BB	BB	BB	BB	BB	BB	AA	AA	AA	BB	BB	BB	AA	BB	BB	AA	AA	BB	AA	BB	BB	BB	BB	AA	AA	BB	BB	AA	BB	-
1_10745316	1	38.96403738	BB	AA	BB	AA	BB	AA	AA	AA	BB	BB	BB	AA	AA	BB	AA	AA	AA	BB	BB	BB	BB	BB	BB	AA	AA	AA	BB	BB	BB	AA	BB	BB	AA	AA	BB	AA	BB	BB	BB	BB	AA	AA	BB	BB	AA	BB	-
1_10747883	1	38.96403743	BB	AA	BB	AA	BB	AA	AA	AA	BB	BB	BB	AA	AA	BB	AA	AA	AA	BB	BB	BB	BB	BB	BB	AA	AA	AA	BB	BB	BB	AA	BB	BB	AA	AA	BB	AA	BB	BB	BB	BB	AA	AA	BB	BB	AA	BB	-
1_10767862	1	38.96403748	-	-	-	-	-	-	-	-	-	-	-	-	-	-	-	-	-	-	-	-	-	-	-	-	-	-	-	-	-	-	-	-	-	-	-	-	-	-	-	-	-	-	-	-	-	-	-
1_10788196	1	38.96403753	-	-	-	-	-	-	-	-	-	-	-	-	-	-	-	-	-	-	-	-	-	-	-	-	-	-	-	-	-	-	-	-	-	-	-	-	-	-	-	-	-	-	-	-	-	-	-
1_10796568	1	38.96403758	-	-	-	-	-	-	-	-	-	-	-	-	-	-	-	-	-	-	-	-	-	-	-	-	-	-	-	-	-	-	-	-	-	-	-	-	-	-	-	-	-	-	-	-	-	-	-
1_10805132	1	38.96403763	-	-	-	-	-	-	-	-	-	-	-	-	-	-	-	-	-	-	-	-	-	-	-	-	-	-	-	-	-	-	-	-	-	-	-	-	-	-	-	-	-	-	-	-	-	-	-
1_10811729	1	38.96403768	BB	AA	BB	AA	BB	AA	AA	AA	BB	BB	BB	AA	AA	BB	AA	AA	AA	BB	BB	BB	BB	BB	BB	AA	AA	AA	BB	BB	BB	AA	BB	BB	AA	AA	BB	AA	BB	BB	BB	BB	AA	AA	BB	BB	AA	BB	-
1_10812608	1	38.96403773	BB	AA	BB	AA	BB	AA	AA	AA	BB	BB	BB	AA	AA	BB	AA	AA	AA	BB	BB	BB	BB	BB	BB	AA	AA	AA	BB	BB	BB	AA	BB	BB	AA	AA	BB	AA	BB	BB	BB	BB	AA	AA	BB	BB	AA	BB	-
1_10828188	1	38.96403778	BB	AA	BB	AA	BB	AA	AA	AA	BB	BB	BB	AA	AA	BB	AA	AA	AA	BB	BB	BB	BB	BB	BB	AA	AA	AA	BB	BB	BB	AA	BB	BB	AA	AA	BB	AA	BB	BB	BB	BB	AA	AA	BB	BB	AA	BB	-
1_10849757	1	38.96403783	BB	AA	BB	AA	BB	AA	AA	AA	BB	BB	BB	AA	AA	BB	AA	AA	AA	BB	BB	BB	BB	BB	BB	AA	AA	AA	BB	BB	BB	AA	BB	BB	AA	AA	BB	AA	BB	BB	BB	BB	AA	AA	BB	BB	AA	BB	-
1_10853695	1	38.96403788	BB	AA	BB	AA	BB	AA	AA	AA	BB	BB	BB	AA	AA	BB	AA	AA	AA	BB	BB	BB	BB	BB	BB	AA	AA	AA	BB	BB	BB	AA	BB	BB	AA	AA	BB	AA	BB	BB	BB	BB	AA	AA	BB	BB	AA	BB	-
1_10856145	1	38.96403793	BB	AA	BB	AA	BB	AA	AA	AA	BB	BB	BB	AA	AA	BB	AA	AA	AA	BB	BB	BB	BB	BB	BB	AA	AA	AA	BB	BB	BB	AA	BB	BB	AA	AA	BB	AA	BB	BB	BB	BB	AA	AA	BB	BB	AA	BB	-
1_10873897	1	38.96403798	BB	AA	BB	AA	BB	AA	AA	AA	BB	BB	BB	AA	AA	BB	AA	AA	AA	BB	BB	BB	BB	BB	BB	AA	AA	AA	BB	BB	BB	AA	BB	BB	AA	AA	BB	AA	BB	BB	BB	BB	AA	AA	BB	BB	AA	BB	-
1_10881242	1	38.96403803	BB	AA	BB	AA	BB	AA	AA	AA	BB	BB	BB	AA	AA	BB	AA	AA	AA	BB	BB	BB	BB	BB	BB	AA	AA	AA	BB	BB	-	AA	BB	BB	AA	-	BB	AA	BB	BB	BB	BB	AA	AA	BB	BB	AA	BB	BB
1_10902197	1	38.96403808	BB	AA	BB	AA	BB	AA	AA	AA	BB	BB	BB	AA	AA	BB	AA	AA	AA	BB	BB	BB	BB	BB	BB	AA	AA	AA	BB	BB	-	AA	BB	BB	AA	-	BB	AA	BB	BB	BB	BB	AA	AA	BB	BB	AA	BB	BB
1_10903188	1	38.96403813	-	-	-	-	-	-	-	-	-	-	-	-	-	-	-	-	-	-	-	-	-	-	-	-	-	-	-	-	-	-	-	-	-	-	-	-	-	-	-	-	-	-	-	-	-	-	-
1_10920888	1	38.96403818	-	-	-	-	-	-	-	-	-	-	-	-	-	-	-	-	-	-	-	-	-	-	-	-	-	-	-	-	-	-	-	-	-	-	-	-	-	-	-	-	-	-	-	-	-	-	-
1_10925519	1	38.96403823	-	-	-	-	-	-	-	-	-	-	-	-	-	-	-	-	-	-	-	-	-	-	-	-	-	-	-	-	-	-	-	-	-	-	-	-	-	-	-	-	-	-	-	-	-	-	-
1_10957620	1	38.96403828	BB	AA	BB	AA	BB	AA	AA	AA	BB	BB	BB	AA	AA	BB	AA	AA	AA	BB	BB	BB	BB	BB	BB	AA	AA	AA	BB	BB	-	AA	BB	BB	AA	-	BB	AA	BB	BB	BB	BB	AA	AA	BB	BB	AA	BB	BB
1_10967048	1	38.96403833	-	-	-	-	-	-	-	-	-	-	-	-	-	-	-	-	-	-	-	-	-	-	-	-	-	-	-	-	-	-	-	-	-	-	-	-	-	-	-	-	-	-	-	-	-	-	-
1_10967887	1	38.96403838	BB	AA	BB	AA	BB	AA	AA	AA	BB	BB	BB	AA	AA	BB	AA	AA	AA	BB	BB	BB	BB	BB	BB	AA	AA	AA	BB	BB	-	AA	BB	BB	AA	-	BB	AA	BB	BB	BB	BB	AA	AA	BB	BB	AA	BB	BB
1_10968314	1	38.96403843	BB	AA	BB	AA	BB	AA	AA	AA	BB	BB	BB	AA	AA	BB	AA	AA	AA	BB	BB	BB	BB	BB	BB	AA	AA	AA	BB	BB	-	AA	BB	BB	AA	-	BB	AA	BB	BB	BB	BB	AA	AA	BB	BB	AA	BB	BB
1_10968635	1	38.96403848	BB	AA	BB	AA	BB	AA	AA	AA	BB	BB	BB	AA	AA	BB	AA	AA	AA	BB	BB	BB	BB	BB	BB	AA	AA	AA	BB	BB	-	AA	BB	BB	AA	-	BB	AA	BB	BB	BB	BB	AA	AA	BB	BB	AA	BB	BB
1_10971699	1	38.96403853	BB	AA	BB	AA	BB	AA	AA	AA	BB	BB	BB	AA	AA	BB	AA	AA	AA	BB	BB	BB	BB	BB	BB	AA	AA	AA	BB	BB	-	AA	BB	BB	AA	-	BB	AA	BB	BB	BB	BB	AA	AA	BB	BB	AA	BB	BB
1_10999702	1	38.96403858	BB	AA	BB	AA	BB	AA	AA	AA	BB	BB	BB	AA	AA	BB	AA	AA	AA	BB	BB	BB	BB	BB	BB	AA	AA	AA	BB	BB	-	AA	BB	BB	AA	-	BB	AA	BB	BB	BB	BB	AA	AA	BB	BB	AA	BB	BB
1_11007551	1	38.96403863	BB	AA	BB	AA	BB	AA	AA	AA	BB	BB	BB	AA	AA	BB	AA	AA	AA	BB	BB	BB	BB	BB	BB	AA	AA	AA	BB	BB	-	AA	BB	BB	AA	-	BB	AA	BB	BB	BB	BB	AA	AA	BB	BB	AA	BB	BB
1_11009589	1	38.96403868	-	-	-	-	-	-	-	-	-	-	-	-	-	-	-	-	-	-	-	-	-	-	-	-	-	-	-	-	-	-	-	-	-	-	-	-	-	-	-	-	-	-	-	-	-	-	-
1_11019274	1	38.96403873	BB	AA	BB	AA	BB	AA	AA	AA	BB	BB	BB	AA	AA	BB	AA	AA	AA	BB	BB	BB	BB	BB	BB	AA	AA	AA	BB	BB	-	AA	BB	BB	AA	-	BB	AA	BB	BB	BB	BB	AA	AA	BB	BB	AA	BB	BB
1_11029735	1	40.99695233	-	-	-	-	-	-	-	-	-	-	-	-	-	-	-	-	-	-	-	-	-	-	-	-	-	-	-	-	-	-	-	-	-	-	-	-	-	-	-	-	-	-	-	-	-	-	-
1_11041328	1	40.99695238	BB	AA	BB	AA	BB	AA	AA	AA	BB	BB	BB	AA	AA	BB	AA	AA	AA	BB	BB	BB	BB	BB	BB	AA	AA	AA	BB	BB	-	AA	BB	BB	AA	-	BB	AA	BB	BB	BB	BB	AA	AA	BB	BB	AA	BB	BB
1_11051696	1	40.99695243	BB	AA	BB	AA	BB	AA	AA	AA	BB	BB	BB	AA	AA	BB	AA	AA	AA	BB	BB	BB	BB	BB	BB	AA	AA	AA	BB	BB	-	AA	BB	BB	AA	-	BB	AA	BB	BB	BB	BB	AA	AA	BB	BB	AA	BB	BB
1_11053631	1	40.99695248	BB	AA	BB	AA	BB	AA	AA	AA	BB	BB	BB	AA	AA	BB	AA	AA	AA	BB	BB	BB	BB	BB	BB	AA	AA	AA	BB	BB	-	AA	BB	BB	AA	-	BB	AA	BB	BB	BB	BB	AA	AA	BB	BB	AA	BB	BB
1_11054350	1	40.99695253	BB	AA	BB	AA	BB	AA	AA	AA	BB	BB	BB	AA	AA	BB	AA	AA	AA	BB	BB	BB	BB	BB	BB	AA	AA	AA	BB	BB	-	AA	BB	BB	AA	-	BB	AA	BB	BB	BB	BB	AA	AA	BB	BB	AA	BB	BB
1_11064344	1	40.99695258	BB	AA	BB	AA	BB	AA	AA	AA	BB	BB	BB	AA	AA	BB	AA	AA	AA	BB	BB	BB	BB	BB	BB	AA	AA	AA	BB	BB	-	AA	BB	BB	AA	-	BB	AA	BB	BB	BB	BB	AA	AA	BB	BB	AA	BB	BB
1_11070733	1	40.99695263	BB	AA	BB	AA	BB	AA	AA	AA	BB	BB	BB	AA	AA	BB	AA	AA	AA	BB	BB	BB	BB	BB	BB	AA	AA	AA	BB	BB	-	AA	BB	BB	AA	-	BB	AA	BB	BB	BB	BB	AA	AA	BB	BB	AA	BB	BB
1_11082113	1	41.4944428	BB	AA	BB	AA	BB	AA	AA	AA	BB	BB	BB	AA	AA	BB	AA	AA	AA	BB	BB	BB	BB	BB	BB	AA	AA	AA	BB	BB	-	AA	BB	BB	AA	-	BB	AA	BB	BB	BB	BB	AA	AA	BB	BB	AA	BB	BB
1_11091638	1	41.49444285	BB	AA	BB	AA	BB	AA	AA	AA	BB	BB	BB	AA	AA	BB	AA	AA	AA	BB	BB	BB	BB	BB	BB	AA	AA	AA	BB	BB	-	AA	BB	BB	AA	-	BB	AA	BB	BB	BB	BB	AA	AA	BB	BB	AA	BB	BB
1_11099311	1	41.4944429	BB	AA	BB	AA	BB	AA	AA	AA	BB	BB	BB	AA	AA	BB	AA	AA	AA	BB	BB	BB	BB	BB	BB	AA	AA	AA	BB	BB	-	AA	BB	BB	AA	-	BB	AA	BB	BB	BB	BB	AA	AA	BB	BB	AA	BB	BB
1_11111537	1	41.49444295	BB	AA	BB	AA	BB	AA	AA	AA	BB	BB	BB	AA	AA	BB	AA	AA	AA	BB	BB	BB	BB	BB	BB	AA	AA	AA	BB	BB	-	AA	BB	BB	AA	-	BB	AA	BB	BB	BB	BB	AA	AA	BB	BB	AA	BB	BB
1_11119882	1	41.494443	BB	AA	BB	AA	BB	AA	AA	AA	BB	BB	BB	AA	AA	BB	AA	AA	AA	BB	BB	BB	BB	BB	BB	AA	AA	AA	BB	BB	-	AA	BB	BB	AA	-	BB	AA	BB	BB	BB	BB	AA	AA	BB	BB	AA	BB	BB
1_11119909	1	41.49444305	BB	AA	BB	AA	BB	AA	AA	AA	BB	BB	BB	AA	AA	BB	AA	AA	AA	BB	BB	BB	BB	BB	BB	AA	AA	AA	BB	BB	-	AA	BB	BB	AA	-	BB	AA	BB	BB	BB	BB	AA	AA	BB	BB	AA	BB	BB
1_11123645	1	41.4944431	BB	AA	BB	AA	BB	AA	AA	AA	BB	BB	BB	AA	AA	BB	AA	AA	AA	BB	BB	BB	BB	BB	BB	AA	AA	AA	BB	BB	-	AA	BB	BB	AA	-	BB	AA	BB	BB	BB	BB	AA	AA	BB	BB	AA	BB	BB
1_11124234	1	41.49444315	BB	AA	BB	AA	BB	AA	AA	AA	BB	BB	BB	AA	AA	BB	AA	AA	AA	BB	BB	BB	BB	BB	BB	AA	AA	AA	BB	BB	-	AA	BB	BB	AA	-	BB	AA	BB	BB	BB	BB	AA	AA	BB	BB	AA	BB	BB
1_11134575	1	41.4944432	BB	AA	BB	AA	BB	AA	AA	AA	BB	BB	BB	AA	AA	BB	AA	AA	AA	BB	BB	BB	BB	BB	BB	AA	AA	AA	BB	BB	-	AA	BB	BB	AA	-	BB	AA	BB	BB	BB	BB	AA	AA	BB	BB	AA	BB	BB
1_11144945	1	41.49444325	BB	AA	BB	AA	BB	AA	AA	AA	BB	BB	BB	AA	AA	BB	AA	AA	AA	BB	BB	BB	BB	BB	BB	AA	AA	AA	BB	BB	-	AA	BB	BB	AA	-	BB	AA	BB	BB	BB	BB	AA	AA	BB	BB	AA	BB	BB
1_11145277	1	41.4944433	BB	AA	BB	AA	BB	AA	AA	AA	BB	BB	BB	AA	AA	BB	AA	AA	AA	BB	BB	BB	BB	BB	BB	AA	AA	AA	BB	BB	-	AA	BB	BB	AA	-	BB	AA	BB	BB	BB	BB	AA	AA	BB	BB	AA	BB	BB
1_11146495	1	41.49444335	BB	AA	BB	AA	BB	AA	AA	AA	BB	BB	BB	AA	AA	BB	AA	AA	AA	BB	BB	BB	BB	BB	BB	AA	AA	AA	BB	BB	-	AA	BB	BB	AA	-	BB	AA	BB	BB	BB	BB	AA	AA	BB	BB	AA	BB	BB
1_11152869	1	41.4944434	-	-	-	-	-	-	-	-	-	-	-	-	-	-	-	-	-	-	-	-	-	-	-	-	-	-	-	-	-	-	-	-	-	-	-	-	-	-	-	-	-	-	-	-	-	-	-
1_11155122	1	41.49444345	BB	AA	BB	AA	BB	AA	AA	AA	BB	BB	BB	AA	AA	BB	AA	AA	AA	BB	BB	BB	BB	BB	BB	AA	AA	AA	BB	BB	-	AA	BB	BB	AA	-	BB	AA	BB	BB	BB	BB	AA	AA	BB	BB	AA	BB	BB
1_11158109	1	41.4944435	BB	AA	BB	AA	BB	AA	AA	AA	BB	BB	BB	AA	AA	BB	AA	AA	AA	BB	BB	BB	BB	BB	BB	AA	AA	AA	BB	BB	-	AA	BB	BB	AA	-	BB	AA	BB	BB	BB	BB	AA	AA	BB	BB	AA	BB	BB
1_11163729	1	41.49444355	BB	AA	BB	AA	BB	AA	AA	AA	BB	BB	BB	AA	AA	BB	AA	AA	AA	BB	BB	BB	BB	BB	BB	AA	AA	AA	BB	BB	-	AA	BB	BB	AA	-	BB	AA	BB	BB	BB	BB	AA	AA	BB	BB	AA	BB	BB
1_11165790	1	41.4944436	BB	AA	BB	AA	BB	AA	AA	AA	BB	BB	BB	AA	AA	BB	AA	AA	AA	BB	BB	BB	BB	BB	BB	AA	AA	AA	BB	BB	-	AA	BB	BB	AA	-	BB	AA	BB	BB	BB	BB	AA	AA	BB	BB	AA	BB	BB
1_11167630	1	41.49444365	BB	AA	BB	AA	BB	AA	AA	AA	BB	BB	BB	AA	AA	BB	AA	AA	AA	BB	BB	BB	BB	BB	BB	AA	AA	AA	BB	BB	-	AA	BB	BB	AA	-	BB	AA	BB	BB	BB	BB	AA	AA	BB	BB	AA	BB	BB
1_11168946	1	41.4944437	BB	AA	BB	AA	BB	AA	AA	AA	BB	BB	BB	AA	AA	BB	AA	AA	AA	BB	BB	BB	BB	BB	BB	AA	AA	AA	BB	BB	-	AA	BB	BB	AA	-	BB	AA	BB	BB	BB	BB	AA	AA	BB	BB	AA	BB	BB
1_11180475	1	41.49444375	-	-	-	-	-	-	-	-	-	-	-	-	-	-	-	-	-	-	-	-	-	-	-	-	-	-	-	-	-	-	-	-	-	-	-	-	-	-	-	-	-	-	-	-	-	-	-
1_11198567	1	41.4944438	BB	AA	BB	AA	BB	AA	AA	AA	BB	BB	BB	AA	AA	BB	AA	AA	AA	BB	BB	BB	BB	BB	BB	AA	AA	AA	BB	BB	-	AA	BB	BB	AA	-	BB	AA	BB	BB	BB	BB	AA	AA	BB	BB	AA	BB	BB
1_11215275	1	41.49444385	-	-	-	-	-	-	-	-	-	-	-	-	-	-	-	-	-	-	-	-	-	-	-	-	-	-	-	-	-	-	-	-	-	-	-	-	-	-	-	-	-	-	-	-	-	-	-
1_11218804	1	41.4944439	BB	AA	BB	AA	BB	AA	AA	AA	BB	BB	BB	AA	AA	BB	AA	AA	AA	BB	BB	BB	BB	BB	BB	AA	AA	AA	BB	BB	-	AA	BB	BB	AA	-	BB	AA	BB	BB	BB	BB	AA	AA	BB	BB	AA	BB	BB
1_11220061	1	41.49444395	BB	AA	BB	AA	BB	AA	AA	AA	BB	BB	BB	AA	AA	BB	AA	AA	AA	BB	BB	BB	BB	BB	BB	AA	AA	AA	BB	BB	-	AA	BB	BB	AA	-	BB	AA	BB	BB	BB	BB	AA	AA	BB	BB	AA	BB	BB
1_11224867	1	41.494444	BB	AA	BB	AA	BB	AA	AA	AA	BB	BB	BB	AA	AA	BB	AA	AA	AA	BB	BB	BB	BB	BB	BB	AA	AA	AA	BB	BB	-	AA	BB	BB	AA	-	BB	AA	BB	BB	BB	BB	AA	AA	BB	BB	AA	BB	BB
1_11225727	1	41.49444405	-	-	-	-	-	-	-	-	-	-	-	-	-	-	-	-	-	-	-	-	-	-	-	-	-	-	-	-	-	-	-	-	-	-	-	-	-	-	-	-	-	-	-	-	-	-	-
1_11238276	1	42.30259437	BB	AA	BB	AA	BB	AA	AA	AA	BB	BB	BB	AA	AA	BB	AA	AA	AA	BB	BB	BB	BB	BB	BB	AA	AA	AA	BB	BB	-	AA	BB	BB	AA	-	BB	AA	BB	BB	BB	BB	AA	AA	BB	BB	AA	BB	BB
1_11239951	1	42.30259442	BB	AA	BB	AA	BB	AA	AA	AA	BB	BB	BB	AA	AA	BB	AA	AA	AA	BB	BB	BB	BB	BB	BB	AA	AA	AA	BB	BB	-	AA	BB	BB	AA	-	BB	AA	BB	BB	BB	BB	AA	AA	BB	BB	AA	BB	BB
1_11243887	1	42.30259447	BB	AA	BB	AA	BB	AA	AA	AA	BB	BB	BB	AA	AA	BB	AA	AA	AA	BB	BB	BB	BB	BB	BB	AA	AA	AA	BB	BB	-	AA	BB	BB	AA	-	BB	AA	BB	BB	BB	BB	AA	AA	BB	BB	AA	BB	BB
1_11244326	1	42.30259452	-	-	-	-	-	-	-	-	-	-	-	-	-	-	-	-	-	-	-	-	-	-	-	-	-	-	-	-	-	-	-	-	-	-	-	-	-	-	-	-	-	-	-	-	-	-	-
1_11253432	1	42.30259457	BB	AA	BB	AA	BB	AA	AA	AA	BB	BB	BB	AA	AA	BB	AA	AA	AA	BB	BB	BB	BB	BB	BB	AA	AA	AA	BB	BB	-	AA	BB	BB	AA	-	BB	AA	BB	BB	BB	BB	AA	AA	BB	BB	AA	BB	BB
1_11253718	1	42.30259462	BB	AA	BB	AA	BB	AA	AA	AA	BB	BB	BB	AA	AA	BB	AA	AA	AA	BB	BB	BB	BB	BB	BB	AA	AA	AA	BB	BB	-	AA	BB	BB	AA	-	BB	AA	BB	BB	BB	BB	AA	AA	BB	BB	AA	BB	BB
1_11255332	1	42.30259467	BB	AA	BB	AA	BB	AA	AA	AA	BB	BB	BB	AA	AA	BB	AA	AA	AA	BB	BB	BB	BB	BB	BB	AA	AA	AA	BB	BB	-	AA	BB	BB	AA	-	BB	AA	BB	BB	BB	BB	AA	AA	BB	BB	AA	BB	BB
1_11257784	1	42.30259472	BB	AA	BB	AA	BB	AA	AA	AA	BB	BB	BB	AA	AA	BB	AA	AA	AA	BB	BB	BB	BB	BB	BB	AA	AA	AA	BB	BB	-	AA	BB	BB	AA	-	BB	AA	BB	BB	BB	BB	AA	AA	BB	BB	AA	BB	BB
1_11281218	1	42.52469652	-	AA	BB	AA	BB	AA	AA	AA	BB	BB	BB	AA	AA	BB	AA	AA	AA	BB	BB	BB	BB	BB	BB	AA	AA	AA	BB	BB	-	AA	BB	BB	AA	BB	BB	AA	BB	BB	BB	BB	-	AA	BB	BB	AA	BB	BB
1_11282070	1	42.52469657	-	AA	BB	AA	BB	AA	AA	AA	BB	BB	BB	AA	AA	BB	AA	AA	AA	BB	BB	BB	BB	BB	BB	AA	AA	AA	BB	BB	-	AA	BB	BB	AA	BB	BB	AA	BB	BB	BB	BB	-	AA	BB	BB	AA	BB	BB
1_11282499	1	42.52469662	-	AA	BB	AA	BB	AA	AA	AA	BB	BB	BB	AA	AA	BB	AA	AA	AA	BB	BB	BB	BB	BB	BB	AA	AA	AA	BB	BB	-	AA	BB	BB	AA	BB	BB	AA	BB	BB	BB	BB	-	AA	BB	BB	AA	BB	BB
1_11287715	1	42.52469667	-	-	-	-	-	-	-	-	-	-	-	-	-	-	-	-	-	-	-	-	-	-	-	-	-	-	-	-	-	-	-	-	-	-	-	-	-	-	-	-	-	-	-	-	-	-	-
1_11290687	1	42.52469672	-	AA	BB	AA	BB	AA	AA	AA	BB	BB	BB	AA	AA	BB	AA	AA	AA	BB	BB	BB	BB	BB	BB	AA	AA	AA	BB	BB	-	AA	BB	BB	AA	BB	BB	AA	BB	BB	BB	BB	-	AA	BB	BB	AA	BB	BB
1_11291540	1	42.52469677	-	AA	BB	AA	BB	AA	AA	AA	BB	BB	BB	AA	AA	BB	AA	AA	AA	BB	BB	BB	BB	BB	BB	AA	AA	AA	BB	BB	-	AA	BB	BB	AA	BB	BB	AA	BB	BB	BB	BB	-	AA	BB	BB	AA	BB	BB
1_11292379	1	42.52469682	-	AA	BB	AA	BB	AA	AA	AA	BB	BB	BB	AA	AA	BB	AA	AA	AA	BB	BB	BB	BB	BB	BB	AA	AA	AA	BB	BB	-	AA	BB	BB	AA	BB	BB	AA	BB	BB	BB	BB	-	AA	BB	BB	AA	BB	BB
1_11311542	1	42.52469687	-	AA	BB	AA	BB	AA	AA	AA	BB	BB	BB	AA	AA	BB	AA	AA	AA	BB	BB	BB	BB	BB	BB	AA	AA	AA	BB	BB	-	AA	BB	BB	AA	BB	BB	AA	BB	BB	BB	BB	-	AA	BB	BB	AA	BB	BB
1_11313418	1	42.52469692	-	AA	BB	AA	BB	AA	AA	AA	BB	BB	BB	AA	AA	BB	AA	AA	AA	BB	BB	BB	BB	BB	BB	AA	AA	AA	BB	BB	-	AA	BB	BB	AA	BB	BB	AA	BB	BB	BB	BB	-	AA	BB	BB	AA	BB	BB
1_11316952	1	42.52469697	-	AA	BB	AA	BB	AA	AA	AA	BB	BB	BB	AA	AA	BB	AA	AA	AA	BB	BB	BB	BB	BB	BB	AA	AA	AA	BB	BB	-	AA	BB	BB	AA	BB	BB	AA	BB	BB	BB	BB	-	AA	BB	BB	AA	BB	BB
1_11317402	1	42.52469702	-	AA	BB	AA	BB	AA	AA	AA	BB	BB	BB	AA	AA	BB	AA	AA	AA	BB	BB	BB	BB	BB	BB	AA	AA	AA	BB	BB	-	AA	BB	BB	AA	BB	BB	AA	BB	BB	BB	BB	-	AA	BB	BB	AA	BB	BB
1_11322291	1	42.52469707	-	AA	BB	AA	BB	AA	AA	AA	BB	BB	BB	AA	AA	BB	AA	AA	AA	BB	BB	BB	BB	BB	BB	AA	AA	AA	BB	BB	-	AA	BB	BB	AA	BB	BB	AA	BB	BB	BB	BB	-	AA	BB	BB	AA	BB	BB
1_11344604	1	42.52469712	-	AA	BB	AA	BB	AA	AA	AA	BB	BB	BB	AA	AA	BB	AA	AA	AA	BB	BB	BB	BB	BB	BB	AA	AA	AA	BB	BB	-	AA	BB	BB	AA	BB	BB	AA	BB	BB	BB	BB	-	AA	BB	BB	AA	BB	BB
1_11350327	1	42.52469717	-	AA	BB	AA	BB	AA	AA	AA	BB	BB	BB	AA	AA	BB	AA	AA	AA	BB	BB	BB	BB	BB	BB	AA	AA	AA	BB	BB	-	AA	BB	BB	AA	BB	BB	AA	BB	BB	BB	BB	-	AA	BB	BB	AA	BB	BB
1_11352759	1	42.52469722	-	AA	BB	AA	BB	AA	AA	AA	BB	BB	BB	AA	AA	BB	AA	AA	AA	BB	BB	BB	BB	BB	BB	AA	AA	AA	BB	BB	-	AA	BB	BB	AA	BB	BB	AA	BB	BB	BB	BB	-	AA	BB	BB	AA	BB	BB
1_11352855	1	42.52469727	-	AA	BB	AA	BB	AA	AA	AA	BB	BB	BB	AA	AA	BB	AA	AA	AA	BB	BB	BB	BB	BB	BB	AA	AA	AA	BB	BB	-	AA	BB	BB	AA	BB	BB	AA	BB	BB	BB	BB	-	AA	BB	BB	AA	BB	BB
1_11353490	1	42.52469732	-	AA	BB	AA	BB	AA	AA	AA	BB	BB	BB	AA	AA	BB	AA	AA	AA	BB	BB	BB	BB	BB	BB	AA	AA	AA	BB	BB	-	AA	BB	BB	AA	BB	BB	AA	BB	BB	BB	BB	-	AA	BB	BB	AA	BB	BB
1_11354702	1	42.52469737	-	AA	BB	AA	BB	AA	AA	AA	BB	BB	BB	AA	AA	BB	AA	AA	AA	BB	BB	BB	BB	BB	BB	AA	AA	AA	BB	BB	-	AA	BB	BB	AA	BB	BB	AA	BB	BB	BB	BB	-	AA	BB	BB	AA	BB	BB
1_11357779	1	42.52469742	-	-	-	-	-	-	-	-	-	-	-	-	-	-	-	-	-	-	-	-	-	-	-	-	-	-	-	-	-	-	-	-	-	-	-	-	-	-	-	-	-	-	-	-	-	-	-
1_11375958	1	42.52469747	-	AA	BB	AA	BB	AA	AA	AA	BB	BB	BB	AA	AA	BB	AA	AA	AA	BB	BB	BB	BB	BB	BB	AA	AA	AA	BB	BB	-	AA	BB	BB	AA	BB	BB	AA	BB	BB	BB	BB	-	AA	BB	BB	AA	BB	BB
1_11390632	1	42.52469752	-	AA	BB	AA	BB	AA	AA	AA	BB	BB	BB	AA	AA	BB	AA	AA	AA	BB	BB	BB	BB	BB	BB	AA	AA	AA	BB	BB	-	AA	BB	BB	AA	BB	BB	AA	BB	BB	BB	BB	-	AA	BB	BB	AA	BB	BB
1_11399234	1	42.52469757	-	AA	BB	AA	BB	AA	AA	AA	BB	BB	BB	AA	AA	BB	AA	AA	AA	BB	BB	BB	BB	BB	BB	AA	AA	AA	BB	BB	-	AA	BB	BB	AA	BB	BB	AA	BB	BB	BB	BB	-	AA	BB	BB	AA	BB	BB
1_11412673	1	42.84971486	AA	AA	BB	AA	BB	AA	AA	AA	BB	BB	BB	AA	AA	BB	AA	AA	AA	BB	BB	BB	BB	BB	BB	AA	AA	AA	BB	BB	AA	AA	BB	BB	AA	BB	BB	AA	BB	BB	BB	BB	BB	AA	BB	BB	AA	BB	BB
1_11415070	1	42.84971491	AA	AA	BB	AA	BB	AA	AA	AA	BB	BB	BB	AA	AA	BB	AA	AA	AA	BB	BB	BB	BB	BB	BB	AA	AA	AA	BB	BB	AA	AA	BB	BB	AA	BB	BB	AA	BB	BB	BB	BB	BB	AA	BB	BB	AA	BB	BB
1_11417147	1	42.84971496	AA	AA	BB	AA	BB	AA	AA	AA	BB	BB	BB	AA	AA	BB	AA	AA	AA	BB	BB	BB	BB	BB	BB	AA	AA	AA	BB	BB	AA	AA	BB	BB	AA	BB	BB	AA	BB	BB	BB	BB	BB	AA	BB	BB	AA	BB	BB
1_11429618	1	42.84971501	AA	AA	BB	AA	BB	AA	AA	AA	BB	BB	BB	AA	AA	BB	AA	AA	AA	BB	BB	BB	BB	BB	BB	AA	AA	AA	BB	BB	AA	AA	BB	BB	AA	BB	BB	AA	BB	BB	BB	BB	BB	AA	BB	BB	AA	BB	BB
1_11432819	1	43.30408712	-	-	-	-	-	-	-	-	-	-	-	-	-	-	-	-	-	-	-	-	-	-	-	-	-	-	-	-	-	-	-	-	-	-	-	-	-	-	-	-	-	-	-	-	-	-	-
1_11452621	1	43.30408717	AA	AA	BB	AA	BB	AA	AA	AA	BB	BB	BB	AA	AA	BB	AA	AA	AA	BB	BB	BB	BB	BB	BB	AA	AA	AA	BB	BB	AA	AA	BB	BB	AA	BB	BB	AA	BB	BB	BB	BB	BB	AA	BB	BB	AA	BB	BB
1_11452782	1	43.30408722	AA	AA	BB	AA	BB	AA	AA	AA	BB	BB	BB	AA	AA	BB	AA	AA	AA	BB	BB	BB	BB	BB	BB	AA	AA	AA	BB	BB	AA	AA	BB	BB	AA	BB	BB	AA	BB	BB	BB	BB	BB	AA	BB	BB	AA	BB	BB
1_11454565	1	43.30408727	-	-	-	-	-	-	-	-	-	-	-	-	-	-	-	-	-	-	-	-	-	-	-	-	-	-	-	-	-	-	-	-	-	-	-	-	-	-	-	-	-	-	-	-	-	-	-
1_11461972	1	43.30408732	AA	AA	BB	AA	BB	AA	AA	AA	BB	BB	BB	AA	AA	BB	AA	AA	AA	BB	BB	BB	BB	BB	BB	AA	AA	AA	BB	BB	AA	AA	BB	BB	AA	BB	BB	AA	BB	BB	BB	BB	BB	AA	BB	BB	AA	BB	BB
1_11463694	1	43.30408737	-	-	-	-	-	-	-	-	-	-	-	-	-	-	-	-	-	-	-	-	-	-	-	-	-	-	-	-	-	-	-	-	-	-	-	-	-	-	-	-	-	-	-	-	-	-	-
1_11464830	1	43.30408742	AA	AA	BB	AA	BB	AA	AA	AA	BB	BB	BB	AA	AA	BB	AA	AA	AA	BB	BB	BB	BB	BB	BB	AA	AA	AA	BB	BB	AA	AA	BB	BB	AA	BB	BB	AA	BB	BB	BB	BB	BB	AA	BB	BB	AA	BB	BB
1_11475828	1	43.30408747	-	-	-	-	-	-	-	-	-	-	-	-	-	-	-	-	-	-	-	-	-	-	-	-	-	-	-	-	-	-	-	-	-	-	-	-	-	-	-	-	-	-	-	-	-	-	-
1_11477406	1	43.30408752	AA	AA	BB	AA	BB	AA	AA	AA	BB	BB	BB	AA	AA	BB	AA	AA	AA	BB	BB	BB	BB	BB	BB	AA	AA	AA	BB	BB	AA	AA	BB	BB	AA	BB	BB	AA	BB	BB	BB	BB	BB	AA	BB	BB	AA	BB	BB
1_11495480	1	43.30408757	-	-	-	-	-	-	-	-	-	-	-	-	-	-	-	-	-	-	-	-	-	-	-	-	-	-	-	-	-	-	-	-	-	-	-	-	-	-	-	-	-	-	-	-	-	-	-
1_11497401	1	43.30408762	AA	AA	BB	AA	BB	AA	AA	AA	BB	BB	BB	AA	AA	BB	AA	AA	AA	BB	BB	BB	BB	BB	BB	AA	AA	AA	BB	BB	AA	AA	BB	BB	AA	BB	BB	AA	BB	BB	BB	BB	BB	AA	BB	BB	AA	BB	BB
1_11511070	1	43.30408767	AA	AA	BB	AA	BB	AA	AA	AA	BB	BB	BB	AA	AA	BB	AA	AA	AA	BB	BB	BB	BB	BB	BB	AA	AA	AA	BB	BB	AA	AA	BB	BB	AA	BB	BB	AA	BB	BB	BB	BB	BB	AA	BB	BB	AA	BB	BB
1_11512802	1	43.30408772	AA	AA	BB	AA	BB	AA	AA	AA	BB	BB	BB	AA	AA	BB	AA	AA	AA	BB	BB	BB	BB	BB	BB	AA	AA	AA	BB	BB	AA	AA	BB	BB	AA	BB	BB	AA	BB	BB	BB	BB	BB	AA	BB	BB	AA	BB	BB
1_11519286	1	43.30408777	AA	AA	BB	AA	BB	AA	AA	AA	BB	BB	BB	AA	AA	BB	AA	AA	AA	BB	BB	BB	BB	BB	BB	AA	AA	AA	BB	BB	AA	AA	BB	BB	AA	BB	BB	AA	BB	BB	BB	BB	BB	AA	BB	BB	AA	BB	BB
1_11520393	1	43.30408782	AA	AA	BB	AA	BB	AA	AA	AA	BB	BB	BB	AA	AA	BB	AA	AA	AA	BB	BB	BB	BB	BB	BB	AA	AA	AA	BB	BB	AA	AA	BB	BB	AA	BB	BB	AA	BB	BB	BB	BB	BB	AA	BB	BB	AA	BB	BB
1_11528685	1	43.30408787	-	-	-	-	-	-	-	-	-	-	-	-	-	-	-	-	-	-	-	-	-	-	-	-	-	-	-	-	-	-	-	-	-	-	-	-	-	-	-	-	-	-	-	-	-	-	-
1_11530477	1	43.30408792	AA	AA	BB	AA	BB	AA	AA	AA	BB	BB	BB	AA	AA	BB	AA	AA	AA	BB	BB	BB	BB	BB	BB	AA	AA	AA	BB	BB	AA	AA	BB	BB	AA	BB	BB	AA	BB	BB	BB	BB	BB	AA	BB	BB	AA	BB	BB
1_11530754	1	43.30408797	-	-	-	-	-	-	-	-	-	-	-	-	-	-	-	-	-	-	-	-	-	-	-	-	-	-	-	-	-	-	-	-	-	-	-	-	-	-	-	-	-	-	-	-	-	-	-
1_11530792	1	43.30408802	AA	AA	BB	AA	BB	AA	AA	AA	BB	BB	BB	AA	AA	BB	AA	AA	AA	BB	BB	BB	BB	BB	BB	AA	AA	AA	BB	BB	AA	AA	BB	BB	AA	BB	BB	AA	BB	BB	BB	BB	BB	AA	BB	BB	AA	BB	BB
1_11531360	1	43.30408807	AA	AA	BB	AA	BB	AA	AA	AA	BB	BB	BB	AA	AA	BB	AA	AA	AA	BB	BB	BB	BB	BB	BB	AA	AA	AA	BB	BB	AA	AA	BB	BB	AA	BB	BB	AA	BB	BB	BB	BB	BB	AA	BB	BB	AA	BB	BB
1_11536381	1	43.30408812	AA	AA	BB	AA	BB	AA	AA	AA	BB	BB	BB	AA	AA	BB	AA	AA	AA	BB	BB	BB	BB	BB	BB	AA	AA	AA	BB	BB	AA	AA	BB	BB	AA	BB	BB	AA	BB	BB	BB	BB	BB	AA	BB	BB	AA	BB	BB
1_11545566	1	43.30408817	AA	AA	BB	AA	BB	AA	AA	AA	BB	BB	BB	AA	AA	BB	AA	AA	AA	BB	BB	BB	BB	BB	BB	AA	AA	AA	BB	BB	AA	AA	BB	BB	AA	BB	BB	AA	BB	BB	BB	BB	BB	AA	BB	BB	AA	BB	BB
1_11545664	1	43.30408822	AA	AA	BB	AA	BB	AA	AA	AA	BB	BB	BB	AA	AA	BB	AA	AA	AA	BB	BB	BB	BB	BB	BB	AA	AA	AA	BB	BB	AA	AA	BB	BB	AA	BB	BB	AA	BB	BB	BB	BB	BB	AA	BB	BB	AA	BB	BB
1_11545798	1	43.30408827	AA	AA	BB	AA	BB	AA	AA	AA	BB	BB	BB	AA	AA	BB	AA	AA	AA	BB	BB	BB	BB	BB	BB	AA	AA	AA	BB	BB	AA	AA	BB	BB	AA	BB	BB	AA	BB	BB	BB	BB	BB	AA	BB	BB	AA	BB	BB
1_11554690	1	43.30408832	AA	AA	BB	AA	BB	AA	AA	AA	BB	BB	BB	AA	AA	BB	AA	AA	AA	BB	BB	BB	BB	BB	BB	AA	AA	AA	BB	BB	AA	AA	BB	BB	AA	BB	BB	AA	BB	BB	BB	BB	BB	AA	BB	BB	AA	BB	BB
1_11563201	1	43.30408837	AA	AA	BB	AA	BB	AA	AA	AA	BB	BB	BB	AA	AA	BB	AA	AA	AA	BB	BB	BB	BB	BB	BB	AA	AA	AA	BB	BB	AA	AA	BB	BB	AA	BB	BB	AA	BB	BB	BB	BB	BB	AA	BB	BB	AA	BB	BB
1_11564270	1	43.30408842	AA	AA	BB	AA	BB	AA	AA	AA	BB	BB	BB	AA	AA	BB	AA	AA	AA	BB	BB	BB	BB	BB	BB	AA	AA	AA	BB	BB	AA	AA	BB	BB	AA	BB	BB	AA	BB	BB	BB	BB	BB	AA	BB	BB	AA	BB	BB
1_11564325	1	43.30408847	AA	AA	BB	AA	BB	AA	AA	AA	BB	BB	BB	AA	AA	BB	AA	AA	AA	BB	BB	BB	BB	BB	BB	AA	AA	AA	BB	BB	AA	AA	BB	BB	AA	BB	BB	AA	BB	BB	BB	BB	BB	AA	BB	BB	AA	BB	BB
1_11569324	1	43.30408852	AA	AA	BB	AA	BB	AA	AA	AA	BB	BB	BB	AA	AA	BB	AA	AA	AA	BB	BB	BB	BB	BB	BB	AA	AA	AA	BB	BB	AA	AA	BB	BB	AA	BB	BB	AA	BB	BB	BB	BB	BB	AA	BB	BB	AA	BB	BB
1_11586132	1	43.30408857	AA	AA	BB	AA	BB	AA	AA	AA	BB	BB	BB	AA	AA	BB	AA	AA	AA	BB	BB	BB	BB	BB	BB	AA	AA	AA	BB	BB	AA	AA	BB	BB	AA	BB	BB	AA	BB	BB	BB	BB	BB	AA	BB	BB	AA	BB	BB
1_11586546	1	43.30408862	AA	AA	BB	AA	BB	AA	AA	AA	BB	BB	BB	AA	AA	BB	AA	AA	AA	BB	BB	BB	BB	BB	BB	AA	AA	AA	BB	BB	AA	AA	BB	BB	AA	BB	BB	AA	BB	BB	BB	BB	BB	AA	BB	BB	AA	BB	BB
1_11589257	1	43.30408867	AA	AA	BB	AA	BB	AA	AA	AA	BB	BB	BB	AA	AA	BB	AA	AA	AA	BB	BB	BB	BB	BB	BB	AA	AA	AA	BB	BB	AA	AA	BB	BB	AA	BB	BB	AA	BB	BB	BB	BB	BB	AA	BB	BB	AA	BB	BB
1_11604724	1	43.30408872	AA	AA	BB	AA	BB	AA	AA	AA	BB	BB	BB	AA	AA	BB	AA	AA	AA	BB	BB	BB	BB	BB	BB	AA	AA	AA	BB	BB	AA	AA	BB	BB	AA	BB	BB	AA	BB	BB	BB	BB	BB	AA	BB	BB	AA	BB	BB
1_11608401	1	43.30408877	AA	AA	BB	AA	BB	AA	AA	AA	BB	BB	BB	AA	AA	BB	AA	AA	AA	BB	BB	BB	BB	BB	BB	AA	AA	AA	BB	BB	AA	AA	BB	BB	AA	BB	BB	AA	BB	BB	BB	BB	BB	AA	BB	BB	AA	BB	BB
1_11610900	1	43.30408882	AA	AA	BB	AA	BB	AA	AA	AA	BB	BB	BB	AA	AA	BB	AA	AA	AA	BB	BB	BB	BB	BB	BB	AA	AA	AA	BB	BB	AA	AA	BB	BB	AA	BB	BB	AA	BB	BB	BB	BB	BB	AA	BB	BB	AA	BB	BB
1_11622443	1	43.30408887	-	-	-	-	-	-	-	-	-	-	-	-	-	-	-	-	-	-	-	-	-	-	-	-	-	-	-	-	-	-	-	-	-	-	-	-	-	-	-	-	-	-	-	-	-	-	-
1_11625104	1	43.30408892	AA	AA	BB	AA	BB	AA	AA	AA	BB	BB	BB	AA	AA	BB	AA	AA	AA	BB	BB	BB	BB	BB	BB	AA	AA	AA	BB	BB	AA	AA	BB	BB	AA	BB	BB	AA	BB	BB	BB	BB	BB	AA	BB	BB	AA	BB	BB
1_11628519	1	43.30408897	-	-	-	-	-	-	-	-	-	-	-	-	-	-	-	-	-	-	-	-	-	-	-	-	-	-	-	-	-	-	-	-	-	-	-	-	-	-	-	-	-	-	-	-	-	-	-
1_11629198	1	43.30408902	AA	AA	BB	AA	BB	AA	AA	AA	BB	BB	BB	AA	AA	BB	AA	AA	AA	BB	BB	BB	BB	BB	BB	AA	AA	AA	BB	BB	AA	AA	BB	BB	AA	BB	BB	AA	BB	BB	BB	BB	BB	AA	BB	BB	AA	BB	BB
1_11650234	1	43.30408907	AA	AA	BB	AA	BB	AA	AA	AA	BB	BB	BB	AA	AA	BB	AA	AA	AA	BB	BB	BB	BB	BB	BB	AA	AA	AA	BB	BB	AA	AA	BB	BB	AA	BB	BB	AA	BB	BB	BB	BB	BB	AA	BB	BB	AA	BB	BB
1_11653548	1	43.30408912	AA	AA	BB	AA	BB	AA	AA	AA	BB	BB	BB	AA	AA	BB	AA	AA	AA	BB	BB	BB	BB	BB	BB	AA	AA	AA	BB	BB	AA	AA	BB	BB	AA	BB	BB	AA	BB	BB	BB	BB	BB	AA	BB	BB	AA	BB	BB
1_11653614	1	43.30408917	AA	AA	BB	AA	BB	AA	AA	AA	BB	BB	BB	AA	AA	BB	AA	AA	AA	BB	BB	BB	BB	BB	BB	AA	AA	AA	BB	BB	AA	AA	BB	BB	AA	BB	BB	AA	BB	BB	BB	BB	BB	AA	BB	BB	AA	BB	BB
1_11663687	1	43.30408922	-	-	-	-	-	-	-	-	-	-	-	-	-	-	-	-	-	-	-	-	-	-	-	-	-	-	-	-	-	-	-	-	-	-	-	-	-	-	-	-	-	-	-	-	-	-	-
1_11678763	1	44.00047405	AA	AA	BB	AA	BB	AA	AA	AA	BB	BB	BB	AA	AA	BB	AA	AA	AA	BB	BB	BB	BB	BB	BB	AA	AA	AA	BB	BB	AA	AA	BB	BB	AA	BB	BB	AA	BB	BB	BB	BB	BB	AA	BB	BB	AA	BB	BB
1_11690094	1	44.0004741	AA	AA	BB	AA	BB	AA	AA	AA	BB	BB	BB	AA	AA	BB	AA	AA	AA	BB	BB	BB	BB	BB	BB	AA	AA	AA	BB	BB	AA	AA	BB	BB	AA	BB	BB	AA	BB	BB	BB	BB	BB	AA	BB	BB	AA	BB	BB
1_11690361	1	44.00047415	AA	AA	BB	AA	BB	AA	AA	AA	BB	BB	BB	AA	AA	BB	AA	AA	AA	BB	BB	BB	BB	BB	BB	AA	AA	AA	BB	BB	AA	AA	BB	BB	AA	BB	BB	AA	BB	BB	BB	BB	BB	AA	BB	BB	AA	BB	BB
1_11690745	1	44.0004742	AA	AA	BB	AA	BB	AA	AA	AA	BB	BB	BB	AA	AA	BB	AA	AA	AA	BB	BB	BB	BB	BB	BB	AA	AA	AA	BB	BB	AA	AA	BB	BB	AA	BB	BB	AA	BB	BB	BB	BB	BB	AA	BB	BB	AA	BB	BB
1_11690841	1	44.00047425	AA	AA	BB	AA	BB	AA	AA	AA	BB	BB	BB	AA	AA	BB	AA	AA	AA	BB	BB	BB	BB	BB	BB	AA	AA	AA	BB	BB	AA	AA	BB	BB	AA	BB	BB	AA	BB	BB	BB	BB	BB	AA	BB	BB	AA	BB	BB
1_11699041	1	44.0004743	AA	AA	BB	AA	BB	AA	AA	AA	BB	BB	BB	AA	AA	BB	AA	AA	AA	BB	BB	BB	BB	BB	BB	AA	AA	AA	BB	BB	AA	AA	BB	BB	AA	BB	BB	AA	BB	BB	BB	BB	BB	AA	BB	BB	AA	BB	BB
1_11714515	1	44.00047435	AA	AA	BB	AA	BB	AA	AA	AA	BB	BB	BB	AA	AA	BB	AA	AA	AA	BB	BB	BB	BB	BB	BB	AA	AA	AA	BB	BB	AA	AA	BB	BB	AA	BB	BB	AA	BB	BB	BB	BB	BB	AA	BB	BB	AA	BB	BB
1_11724044	1	44.0004744	AA	AA	BB	AA	BB	AA	AA	AA	BB	BB	BB	AA	AA	BB	AA	AA	AA	BB	BB	BB	BB	BB	BB	AA	AA	AA	BB	BB	AA	AA	BB	BB	AA	BB	BB	AA	BB	BB	BB	BB	BB	-	BB	BB	AA	BB	BB
1_11750271	1	44.00047445	AA	AA	BB	AA	BB	AA	AA	AA	BB	BB	BB	AA	AA	BB	AA	AA	AA	BB	BB	BB	BB	BB	BB	AA	AA	AA	BB	BB	AA	AA	BB	BB	AA	BB	BB	AA	BB	BB	BB	BB	BB	-	BB	BB	AA	BB	BB
1_11751502	1	44.0004745	AA	AA	BB	AA	BB	AA	AA	AA	BB	BB	BB	AA	AA	BB	AA	AA	AA	BB	BB	BB	BB	BB	BB	AA	AA	AA	BB	BB	AA	AA	BB	BB	AA	BB	BB	AA	BB	BB	BB	BB	BB	-	BB	BB	AA	BB	BB
1_11752281	1	44.00047455	AA	AA	BB	AA	BB	AA	AA	AA	BB	BB	BB	AA	AA	BB	AA	AA	AA	BB	BB	BB	BB	BB	BB	AA	AA	AA	BB	BB	AA	AA	BB	BB	AA	BB	BB	AA	BB	BB	BB	BB	BB	-	BB	BB	AA	BB	BB
1_11771357	1	44.66845583	AA	AA	BB	AA	BB	AA	AA	AA	BB	BB	BB	AA	AA	BB	AA	AA	AA	BB	BB	BB	BB	BB	BB	AA	AA	AA	BB	BB	AA	AA	BB	BB	AA	BB	BB	AA	BB	BB	BB	BB	BB	-	BB	BB	AA	BB	BB
1_11777164	1	44.66845588	-	-	-	-	-	-	-	-	-	-	-	-	-	-	-	-	-	-	-	-	-	-	-	-	-	-	-	-	-	-	-	-	-	-	-	-	-	-	-	-	-	-	-	-	-	-	-
1_11780238	1	44.66845593	AA	AA	BB	AA	BB	AA	AA	AA	BB	BB	BB	AA	AA	BB	AA	AA	AA	BB	BB	BB	BB	BB	BB	AA	AA	AA	BB	BB	AA	AA	BB	BB	AA	BB	BB	AA	BB	BB	BB	BB	BB	-	BB	BB	AA	BB	BB
1_11780252	1	44.66845598	AA	AA	BB	AA	BB	AA	AA	AA	BB	BB	BB	AA	AA	BB	AA	AA	AA	BB	BB	BB	BB	BB	BB	AA	AA	AA	BB	BB	AA	AA	BB	BB	AA	BB	BB	AA	BB	BB	BB	BB	BB	-	BB	BB	AA	BB	BB
1_11783978	1	44.66845603	AA	AA	BB	AA	BB	AA	AA	AA	BB	BB	BB	AA	AA	BB	AA	AA	AA	BB	BB	BB	BB	BB	BB	AA	AA	AA	BB	BB	AA	AA	BB	BB	AA	BB	BB	AA	BB	BB	BB	BB	BB	-	BB	BB	AA	BB	BB
1_11797434	1	44.66845608	AA	AA	BB	AA	BB	AA	AA	AA	BB	BB	BB	AA	AA	BB	AA	AA	AA	BB	BB	BB	BB	BB	BB	AA	AA	AA	BB	BB	AA	AA	BB	BB	AA	BB	BB	AA	BB	BB	BB	BB	BB	-	BB	BB	AA	BB	BB
1_11816769	1	44.66845613	AA	AA	BB	AA	BB	AA	AA	AA	BB	BB	BB	AA	AA	BB	AA	AA	AA	BB	BB	BB	BB	BB	BB	AA	AA	AA	BB	BB	AA	AA	BB	BB	AA	BB	BB	AA	BB	BB	BB	BB	BB	-	BB	BB	AA	BB	BB
1_11822419	1	44.66845618	AA	AA	BB	AA	BB	AA	AA	AA	BB	BB	BB	AA	AA	BB	AA	AA	AA	BB	BB	BB	BB	BB	BB	AA	AA	AA	BB	BB	AA	AA	BB	BB	AA	BB	BB	AA	BB	BB	BB	BB	BB	-	BB	BB	AA	BB	BB
1_11827586	1	44.66845623	AA	AA	BB	AA	BB	AA	AA	AA	BB	BB	BB	AA	AA	BB	AA	AA	AA	BB	BB	BB	BB	BB	BB	AA	AA	AA	BB	BB	AA	AA	BB	BB	AA	BB	BB	AA	BB	BB	BB	BB	BB	-	BB	BB	AA	BB	BB
1_11838865	1	44.66845628	AA	AA	BB	AA	BB	AA	AA	AA	BB	BB	BB	AA	AA	BB	AA	AA	AA	BB	BB	BB	BB	BB	BB	AA	AA	AA	BB	BB	AA	AA	BB	BB	AA	BB	BB	AA	BB	BB	BB	BB	BB	BB	BB	BB	AA	BB	BB
1_11843411	1	44.66845633	AA	AA	BB	AA	BB	AA	AA	AA	BB	BB	BB	AA	AA	BB	AA	AA	AA	BB	BB	BB	BB	BB	BB	AA	AA	AA	BB	BB	AA	AA	BB	BB	AA	BB	BB	AA	BB	BB	BB	BB	BB	BB	BB	BB	AA	BB	BB
1_11855763	1	44.99905299	AA	AA	BB	AA	BB	AA	AA	AA	BB	BB	BB	AA	AA	BB	AA	AA	AA	BB	BB	BB	BB	BB	BB	AA	AA	AA	BB	BB	AA	AA	BB	BB	AA	BB	BB	AA	BB	BB	BB	BB	BB	BB	BB	BB	AA	BB	BB
1_11856643	1	44.99905304	AA	AA	BB	AA	BB	AA	AA	AA	BB	BB	BB	AA	AA	BB	AA	AA	AA	BB	BB	BB	BB	BB	BB	AA	AA	AA	BB	BB	AA	AA	BB	BB	AA	BB	BB	AA	BB	BB	BB	BB	BB	BB	BB	BB	AA	BB	BB
1_11861380	1	44.99905309	AA	AA	BB	AA	BB	AA	AA	AA	BB	BB	BB	AA	AA	BB	AA	AA	AA	BB	BB	BB	BB	BB	BB	AA	AA	AA	BB	BB	AA	AA	BB	BB	AA	BB	BB	AA	BB	BB	BB	BB	BB	BB	BB	BB	AA	BB	BB
1_11862686	1	44.99905314	AA	AA	BB	AA	BB	AA	AA	AA	BB	BB	BB	AA	AA	BB	AA	AA	AA	BB	BB	BB	BB	BB	BB	AA	AA	AA	BB	BB	AA	AA	BB	BB	AA	BB	BB	AA	BB	BB	BB	BB	BB	BB	BB	BB	AA	BB	BB
1_11866677	1	44.99905319	-	-	-	-	-	-	-	-	-	-	-	-	-	-	-	-	-	-	-	-	-	-	-	-	-	-	-	-	-	-	-	-	-	-	-	-	-	-	-	-	-	-	-	-	-	-	-
1_11869498	1	44.99905324	AA	AA	BB	AA	BB	AA	AA	AA	BB	BB	BB	AA	AA	BB	AA	AA	AA	BB	BB	BB	BB	BB	BB	AA	AA	AA	BB	BB	AA	AA	BB	BB	AA	BB	BB	AA	BB	BB	BB	BB	BB	BB	BB	BB	AA	BB	BB
1_11872123	1	44.99905329	AA	AA	BB	AA	BB	AA	AA	AA	BB	BB	BB	AA	AA	BB	AA	AA	AA	BB	BB	BB	BB	BB	BB	AA	AA	AA	BB	BB	AA	AA	BB	BB	AA	BB	BB	AA	BB	BB	BB	BB	BB	BB	BB	BB	AA	BB	BB
1_11877067	1	44.99905334	AA	AA	BB	AA	BB	AA	AA	AA	BB	BB	BB	AA	AA	BB	AA	AA	AA	BB	BB	BB	BB	BB	BB	AA	AA	AA	BB	BB	AA	AA	BB	BB	AA	BB	BB	AA	BB	BB	BB	BB	BB	BB	BB	BB	AA	BB	BB
1_11879715	1	44.99905339	-	-	-	-	-	-	-	-	-	-	-	-	-	-	-	-	-	-	-	-	-	-	-	-	-	-	-	-	-	-	-	-	-	-	-	-	-	-	-	-	-	-	-	-	-	-	-
1_11881316	1	44.99905344	AA	AA	BB	AA	BB	AA	AA	AA	BB	BB	BB	AA	AA	BB	AA	AA	AA	BB	BB	BB	BB	BB	BB	AA	AA	AA	BB	BB	AA	AA	BB	BB	AA	BB	BB	AA	BB	BB	BB	BB	BB	BB	BB	BB	AA	BB	BB
1_11882691	1	44.99905349	AA	AA	BB	AA	BB	AA	AA	AA	BB	BB	BB	AA	AA	BB	AA	AA	AA	BB	BB	BB	BB	BB	BB	AA	AA	AA	BB	BB	AA	AA	BB	BB	AA	BB	BB	AA	BB	BB	BB	BB	BB	BB	BB	BB	AA	BB	BB
1_11886096	1	44.99905354	AA	AA	BB	AA	BB	AA	AA	AA	BB	BB	BB	AA	AA	BB	AA	AA	AA	BB	BB	BB	BB	BB	BB	AA	AA	AA	BB	BB	AA	AA	BB	BB	AA	BB	BB	AA	BB	BB	BB	BB	BB	BB	BB	BB	AA	BB	BB
1_11886941	1	45.21568331	-	-	-	-	-	-	-	-	-	-	-	-	-	-	-	-	-	-	-	-	-	-	-	-	-	-	-	-	-	-	-	-	-	-	-	-	-	-	-	-	-	-	-	-	-	-	-
1_11904953	1	45.21568336	AA	AA	BB	AA	BB	AA	AA	AA	BB	BB	BB	AA	AA	BB	AA	AA	AA	BB	BB	BB	BB	BB	BB	AA	AA	AA	BB	BB	AA	AA	BB	BB	AA	BB	BB	AA	BB	BB	BB	BB	BB	BB	BB	BB	AA	BB	BB
1_11914409	1	45.21568341	AA	AA	BB	AA	BB	AA	AA	AA	BB	BB	BB	AA	AA	BB	AA	AA	AA	BB	BB	BB	BB	BB	BB	AA	AA	AA	BB	BB	AA	AA	BB	BB	AA	BB	BB	AA	BB	BB	BB	BB	BB	BB	BB	BB	AA	BB	BB
1_11917663	1	45.21568346	AA	AA	BB	AA	BB	AA	AA	AA	BB	BB	BB	AA	AA	BB	AA	AA	AA	BB	BB	BB	BB	BB	BB	AA	AA	AA	BB	BB	AA	AA	BB	BB	AA	BB	BB	AA	BB	BB	BB	BB	BB	BB	BB	BB	AA	BB	BB
1_11920577	1	45.21568351	AA	AA	BB	AA	BB	AA	AA	AA	BB	BB	BB	AA	AA	BB	AA	AA	AA	BB	BB	BB	BB	BB	BB	AA	AA	AA	BB	BB	AA	AA	BB	BB	AA	BB	BB	AA	BB	BB	BB	BB	BB	BB	BB	BB	AA	BB	BB
1_11925202	1	45.21568356	AA	AA	BB	AA	BB	AA	AA	AA	BB	BB	BB	AA	AA	BB	AA	AA	AA	BB	BB	BB	BB	BB	BB	AA	AA	AA	BB	BB	AA	AA	BB	BB	AA	BB	BB	AA	BB	BB	BB	BB	BB	BB	BB	BB	AA	BB	BB
1_11930336	1	45.21568361	AA	AA	BB	AA	BB	AA	AA	AA	BB	BB	BB	AA	AA	BB	AA	AA	AA	BB	BB	BB	BB	BB	BB	AA	AA	AA	BB	BB	AA	AA	BB	BB	AA	BB	BB	AA	BB	BB	BB	BB	BB	BB	BB	BB	AA	BB	BB
1_11931355	1	45.21568366	AA	AA	BB	AA	BB	AA	AA	AA	BB	BB	BB	AA	AA	BB	AA	AA	AA	BB	BB	BB	BB	BB	BB	AA	AA	AA	BB	BB	AA	AA	BB	BB	AA	BB	BB	AA	BB	BB	BB	BB	BB	BB	BB	BB	AA	BB	BB
1_11932045	1	45.21568371	AA	AA	BB	AA	BB	AA	AA	AA	BB	BB	BB	AA	AA	BB	AA	AA	AA	BB	BB	BB	BB	BB	BB	AA	AA	AA	BB	BB	AA	AA	BB	BB	AA	BB	BB	AA	BB	BB	BB	BB	BB	BB	BB	BB	AA	BB	BB
1_11933996	1	45.21568376	AA	AA	BB	AA	BB	AA	AA	AA	BB	BB	BB	AA	AA	BB	AA	AA	AA	BB	BB	BB	BB	BB	BB	AA	AA	AA	BB	BB	AA	AA	BB	BB	AA	BB	BB	AA	BB	BB	BB	BB	BB	BB	BB	BB	AA	BB	BB
1_11935775	1	45.21568381	AA	AA	BB	AA	BB	AA	AA	AA	BB	BB	BB	AA	AA	BB	AA	AA	AA	BB	BB	BB	BB	BB	BB	AA	AA	AA	BB	BB	AA	AA	BB	BB	AA	BB	BB	AA	BB	BB	BB	BB	BB	BB	BB	BB	AA	BB	BB
1_11959223	1	45.21568386	AA	AA	BB	AA	BB	AA	AA	AA	BB	BB	BB	AA	AA	BB	AA	AA	AA	BB	BB	BB	BB	BB	BB	AA	AA	AA	BB	BB	AA	AA	BB	BB	AA	BB	BB	AA	BB	BB	BB	BB	BB	BB	BB	BB	AA	BB	BB
1_11959905	1	45.21568391	AA	AA	BB	AA	BB	AA	AA	AA	BB	BB	BB	AA	AA	BB	AA	AA	AA	BB	BB	BB	BB	BB	BB	AA	AA	AA	BB	BB	AA	AA	BB	BB	AA	BB	BB	AA	BB	BB	BB	BB	BB	BB	BB	BB	AA	BB	BB
1_11984540	1	45.21568396	AA	AA	BB	AA	BB	AA	AA	AA	BB	BB	BB	AA	AA	BB	AA	AA	AA	BB	BB	BB	BB	BB	BB	AA	AA	AA	BB	BB	AA	AA	BB	BB	AA	BB	BB	AA	BB	BB	BB	BB	BB	BB	BB	BB	AA	BB	BB
1_11985190	1	45.21568401	AA	AA	BB	AA	BB	AA	AA	AA	BB	BB	BB	AA	AA	BB	AA	AA	AA	BB	BB	BB	BB	BB	BB	AA	AA	AA	BB	BB	AA	AA	BB	BB	AA	BB	BB	AA	BB	BB	BB	BB	BB	BB	BB	BB	AA	BB	BB
1_11987252	1	45.21568406	AA	AA	BB	AA	BB	AA	AA	AA	BB	BB	BB	AA	AA	BB	AA	AA	AA	BB	BB	BB	BB	BB	BB	AA	AA	AA	BB	BB	AA	AA	BB	BB	AA	BB	BB	AA	BB	BB	BB	BB	BB	BB	BB	BB	AA	BB	BB
1_11989145	1	45.21568411	AA	AA	BB	AA	BB	AA	AA	AA	BB	BB	BB	AA	AA	BB	AA	AA	AA	BB	BB	BB	BB	BB	BB	AA	AA	AA	BB	BB	AA	AA	BB	BB	AA	BB	BB	AA	BB	BB	BB	BB	BB	BB	BB	BB	AA	BB	BB
1_11997302	1	45.21568416	AA	AA	BB	AA	BB	AA	AA	AA	BB	BB	BB	AA	AA	BB	AA	AA	AA	BB	BB	BB	BB	BB	BB	AA	AA	AA	BB	BB	AA	AA	BB	BB	AA	BB	BB	AA	BB	BB	BB	BB	BB	BB	BB	BB	AA	BB	BB
1_11998815	1	45.21568421	-	-	-	-	-	-	-	-	-	-	-	-	-	-	-	-	-	-	-	-	-	-	-	-	-	-	-	-	-	-	-	-	-	-	-	-	-	-	-	-	-	-	-	-	-	-	-
1_12004286	1	45.21568426	AA	AA	BB	AA	BB	AA	AA	AA	BB	BB	BB	AA	AA	BB	AA	AA	AA	BB	BB	BB	BB	BB	BB	AA	AA	AA	BB	BB	AA	AA	BB	BB	AA	BB	BB	AA	BB	BB	BB	BB	BB	BB	BB	BB	AA	BB	BB
1_12021130	1	45.38513967	AA	AA	BB	AA	BB	AA	AA	AA	BB	BB	BB	AA	AA	BB	AA	AA	AA	BB	BB	BB	BB	BB	-	AA	AA	AA	BB	BB	AA	AA	BB	BB	AA	BB	BB	AA	BB	BB	BB	BB	BB	BB	BB	BB	AA	BB	BB
1_12026940	1	45.38513972	AA	AA	BB	AA	BB	AA	AA	AA	BB	BB	BB	AA	AA	BB	AA	AA	AA	BB	BB	BB	BB	BB	-	AA	AA	AA	BB	BB	AA	AA	BB	BB	AA	BB	BB	AA	BB	BB	BB	BB	BB	BB	BB	BB	AA	BB	BB
1_12028422	1	45.38513977	-	-	-	-	-	-	-	-	-	-	-	-	-	-	-	-	-	-	-	-	-	-	-	-	-	-	-	-	-	-	-	-	-	-	-	-	-	-	-	-	-	-	-	-	-	-	-
1_12029275	1	45.38513982	AA	AA	BB	AA	BB	AA	AA	AA	BB	BB	BB	AA	AA	BB	AA	AA	AA	BB	BB	BB	BB	BB	-	AA	AA	AA	BB	BB	AA	AA	BB	BB	AA	BB	BB	AA	BB	BB	BB	BB	BB	BB	BB	BB	AA	BB	BB
1_12030120	1	45.38513987	-	-	-	-	-	-	-	-	-	-	-	-	-	-	-	-	-	-	-	-	-	-	-	-	-	-	-	-	-	-	-	-	-	-	-	-	-	-	-	-	-	-	-	-	-	-	-
1_12030523	1	45.38513992	AA	AA	BB	AA	BB	AA	AA	AA	BB	BB	BB	AA	AA	BB	AA	AA	AA	BB	BB	BB	BB	BB	-	AA	AA	AA	BB	BB	AA	AA	BB	BB	AA	BB	BB	AA	BB	BB	BB	BB	BB	BB	BB	BB	AA	BB	BB
1_12037015	1	46.0548965	-	-	-	-	-	-	-	-	-	-	-	-	-	-	-	-	-	-	-	-	-	-	-	-	-	-	-	-	-	-	-	-	-	-	-	-	-	-	-	-	-	-	-	-	-	-	-
1_12045311	1	46.05489655	AA	AA	BB	AA	BB	AA	AA	AA	BB	BB	-	-	AA	BB	AA	AA	AA	BB	BB	BB	BB	BB	-	AA	AA	AA	BB	BB	AA	AA	BB	BB	AA	BB	BB	AA	BB	BB	BB	BB	BB	BB	BB	BB	AA	BB	BB
1_12060048	1	46.0548966	AA	AA	BB	AA	BB	AA	AA	AA	BB	BB	-	-	AA	BB	AA	AA	AA	BB	BB	BB	BB	BB	-	AA	AA	AA	BB	BB	AA	AA	BB	BB	AA	BB	BB	AA	BB	BB	BB	BB	BB	BB	BB	BB	AA	BB	BB
1_12072415	1	46.05489665	AA	AA	BB	AA	BB	AA	AA	AA	BB	BB	-	-	AA	BB	AA	AA	AA	BB	BB	BB	BB	BB	-	AA	AA	AA	BB	BB	AA	AA	BB	BB	AA	BB	BB	AA	BB	BB	BB	BB	BB	BB	BB	BB	AA	BB	BB
1_12081596	1	46.0548967	AA	AA	BB	AA	BB	AA	AA	AA	BB	BB	-	-	AA	BB	AA	AA	AA	BB	BB	BB	BB	BB	-	AA	AA	AA	BB	BB	AA	AA	BB	BB	AA	BB	BB	AA	BB	BB	BB	BB	BB	BB	BB	BB	AA	BB	BB
1_12083044	1	46.05489675	AA	AA	BB	AA	BB	AA	AA	AA	BB	BB	-	-	AA	BB	AA	AA	AA	BB	BB	BB	BB	BB	-	AA	AA	AA	BB	BB	AA	AA	BB	BB	AA	BB	BB	AA	BB	BB	BB	BB	BB	BB	BB	BB	AA	BB	BB
1_12090355	1	46.0548968	AA	AA	BB	AA	BB	AA	AA	AA	BB	BB	-	-	AA	BB	AA	AA	AA	BB	BB	BB	BB	BB	-	AA	AA	AA	BB	BB	AA	AA	BB	BB	AA	BB	BB	AA	BB	BB	BB	BB	BB	BB	BB	BB	AA	BB	BB
1_12096054	1	46.05489685	AA	AA	BB	AA	BB	AA	AA	AA	BB	BB	-	-	AA	BB	AA	AA	AA	BB	BB	BB	BB	BB	-	AA	AA	AA	BB	BB	AA	AA	BB	BB	AA	BB	BB	AA	BB	BB	BB	BB	BB	BB	BB	BB	AA	BB	BB
1_12121168	1	46.0548969	AA	AA	BB	AA	BB	AA	AA	AA	BB	BB	-	-	AA	BB	AA	AA	AA	BB	BB	BB	BB	BB	-	AA	AA	AA	BB	BB	AA	AA	BB	BB	AA	BB	BB	AA	BB	BB	BB	BB	BB	BB	BB	BB	AA	BB	BB
1_12123842	1	46.05489695	AA	AA	BB	AA	BB	AA	AA	AA	BB	BB	-	-	AA	BB	AA	AA	AA	BB	BB	BB	BB	BB	-	AA	AA	AA	BB	BB	AA	AA	BB	BB	AA	BB	BB	AA	BB	BB	BB	BB	BB	BB	BB	BB	AA	BB	BB
1_12127326	1	46.054897	-	-	-	-	-	-	-	-	-	-	-	-	-	-	-	-	-	-	-	-	-	-	-	-	-	-	-	-	-	-	-	-	-	-	-	-	-	-	-	-	-	-	-	-	-	-	-
1_12127965	1	46.05489705	AA	AA	BB	AA	BB	AA	AA	AA	BB	BB	-	-	AA	BB	AA	AA	AA	BB	BB	BB	BB	BB	-	AA	AA	AA	BB	BB	AA	AA	BB	BB	AA	BB	BB	AA	BB	BB	BB	BB	BB	BB	BB	BB	AA	BB	BB
1_12140683	1	46.0548971	AA	AA	BB	AA	BB	AA	AA	AA	BB	BB	-	-	AA	BB	AA	AA	AA	BB	BB	BB	BB	BB	-	AA	AA	AA	BB	BB	AA	AA	BB	BB	AA	BB	BB	AA	BB	BB	BB	BB	BB	BB	BB	BB	AA	BB	BB
1_12151250	1	46.05489715	-	-	-	-	-	-	-	-	-	-	-	-	-	-	-	-	-	-	-	-	-	-	-	-	-	-	-	-	-	-	-	-	-	-	-	-	-	-	-	-	-	-	-	-	-	-	-
1_12163813	1	46.0548972	AA	AA	BB	AA	BB	AA	AA	AA	BB	BB	-	-	AA	BB	AA	AA	AA	BB	BB	BB	BB	BB	-	AA	AA	AA	BB	BB	AA	AA	BB	BB	AA	BB	BB	AA	BB	BB	BB	BB	BB	BB	BB	BB	AA	BB	BB
1_12178103	1	46.05489725	AA	AA	BB	AA	BB	AA	AA	AA	BB	BB	-	-	AA	BB	AA	AA	AA	BB	BB	BB	BB	BB	-	AA	AA	AA	BB	BB	AA	AA	BB	BB	AA	BB	BB	AA	BB	BB	BB	BB	BB	BB	BB	BB	AA	BB	BB
1_12178204	1	46.0548973	AA	AA	BB	AA	BB	AA	AA	AA	BB	BB	-	-	AA	BB	AA	AA	AA	BB	BB	BB	BB	BB	-	AA	AA	AA	BB	BB	AA	AA	BB	BB	AA	BB	BB	AA	BB	BB	BB	BB	BB	BB	BB	BB	AA	BB	BB
1_12179085	1	46.05489735	AA	AA	BB	AA	BB	AA	AA	AA	BB	BB	-	-	AA	BB	AA	AA	AA	BB	BB	BB	BB	BB	-	AA	AA	AA	BB	BB	AA	AA	BB	BB	AA	BB	BB	AA	BB	BB	BB	BB	BB	BB	BB	BB	AA	BB	BB
1_12181370	1	46.0548974	AA	AA	BB	AA	BB	AA	AA	AA	BB	BB	-	-	AA	BB	AA	AA	AA	BB	BB	BB	BB	BB	-	AA	AA	AA	BB	BB	AA	AA	BB	BB	AA	BB	BB	AA	BB	BB	BB	BB	BB	BB	BB	BB	AA	BB	BB
1_12181555	1	46.05489745	AA	AA	BB	AA	BB	AA	AA	AA	BB	BB	-	-	AA	BB	AA	AA	AA	BB	BB	BB	BB	BB	-	AA	AA	AA	BB	BB	AA	AA	BB	BB	AA	BB	BB	AA	BB	BB	BB	BB	BB	BB	BB	BB	AA	BB	BB
1_12181699	1	46.0548975	AA	AA	BB	AA	BB	AA	AA	AA	BB	BB	-	-	AA	BB	AA	AA	AA	BB	BB	BB	BB	BB	-	AA	AA	AA	BB	BB	AA	AA	BB	BB	AA	BB	BB	AA	BB	BB	BB	BB	BB	BB	BB	BB	AA	BB	BB
1_12181927	1	46.05489755	AA	AA	BB	AA	BB	AA	AA	AA	BB	BB	-	-	AA	BB	AA	AA	AA	BB	BB	BB	BB	BB	-	AA	AA	AA	BB	BB	AA	AA	BB	BB	AA	BB	BB	AA	BB	BB	BB	BB	BB	BB	BB	BB	AA	BB	BB
1_12181957	1	46.0548976	AA	AA	BB	AA	BB	AA	AA	AA	BB	BB	-	-	AA	BB	AA	AA	AA	BB	BB	BB	BB	BB	-	AA	AA	AA	BB	BB	AA	AA	BB	BB	AA	BB	BB	AA	BB	BB	BB	BB	BB	BB	BB	BB	AA	BB	BB
1_12182096	1	46.05489765	AA	AA	BB	AA	BB	AA	AA	AA	BB	BB	-	-	AA	BB	AA	AA	AA	BB	BB	BB	BB	BB	-	AA	AA	AA	BB	BB	AA	AA	BB	BB	AA	BB	BB	AA	BB	BB	BB	BB	BB	BB	BB	BB	AA	BB	BB
1_12187150	1	46.0548977	AA	AA	BB	AA	BB	AA	AA	AA	BB	BB	-	-	AA	BB	AA	AA	AA	BB	BB	BB	BB	BB	-	AA	AA	AA	BB	BB	AA	AA	BB	BB	AA	BB	BB	AA	BB	BB	BB	BB	BB	BB	BB	BB	AA	BB	BB
1_12188834	1	46.05489775	AA	AA	BB	AA	BB	AA	AA	AA	BB	BB	-	-	AA	BB	AA	AA	AA	BB	BB	BB	BB	BB	-	AA	AA	AA	BB	BB	AA	AA	BB	BB	AA	BB	BB	AA	BB	BB	BB	BB	BB	BB	BB	BB	AA	BB	BB
1_12215208	1	46.47115568	AA	AA	BB	AA	BB	AA	AA	AA	BB	BB	AA	BB	AA	BB	AA	AA	AA	BB	BB	BB	BB	BB	-	AA	AA	AA	BB	BB	AA	AA	BB	BB	AA	BB	BB	AA	BB	BB	BB	BB	BB	BB	BB	BB	AA	BB	BB
1_12216333	1	46.47115573	-	-	-	-	-	-	-	-	-	-	-	-	-	-	-	-	-	-	-	-	-	-	-	-	-	-	-	-	-	-	-	-	-	-	-	-	-	-	-	-	-	-	-	-	-	-	-
1_12226312	1	46.47115578	AA	AA	BB	AA	BB	AA	AA	AA	BB	BB	AA	BB	AA	BB	AA	AA	AA	BB	BB	BB	BB	BB	-	AA	AA	AA	BB	BB	AA	AA	BB	BB	AA	BB	BB	AA	BB	BB	BB	BB	BB	BB	BB	BB	AA	BB	BB
1_12252724	1	46.47115583	AA	AA	BB	AA	BB	AA	AA	AA	BB	BB	AA	BB	AA	BB	AA	AA	AA	BB	BB	BB	BB	BB	-	AA	AA	AA	BB	BB	AA	AA	BB	BB	AA	BB	BB	AA	BB	BB	BB	BB	BB	BB	BB	BB	AA	BB	BB
1_12253428	1	46.47115588	AA	AA	BB	AA	BB	AA	AA	AA	BB	BB	AA	BB	AA	BB	AA	AA	AA	BB	BB	BB	BB	BB	-	AA	AA	AA	BB	BB	AA	AA	BB	BB	AA	BB	BB	AA	BB	BB	BB	BB	BB	BB	BB	BB	AA	BB	BB
1_12254777	1	46.47115593	AA	AA	BB	AA	BB	AA	AA	AA	BB	BB	AA	BB	AA	BB	AA	AA	AA	BB	BB	BB	BB	BB	-	AA	AA	AA	BB	BB	AA	AA	BB	BB	AA	BB	BB	AA	BB	BB	BB	BB	BB	BB	BB	BB	AA	BB	BB
1_12299954	1	47.09642199	AA	AA	BB	AA	BB	AA	AA	AA	BB	BB	AA	BB	AA	BB	AA	AA	AA	BB	BB	BB	BB	BB	-	AA	AA	AA	BB	BB	AA	AA	BB	BB	AA	BB	BB	AA	BB	BB	BB	BB	BB	BB	BB	BB	AA	BB	BB
1_12319694	1	47.09642204	AA	AA	BB	AA	BB	AA	AA	AA	BB	BB	AA	BB	AA	BB	AA	AA	AA	BB	BB	BB	BB	BB	-	AA	AA	AA	BB	BB	AA	AA	BB	BB	AA	BB	BB	AA	BB	BB	BB	BB	BB	BB	BB	BB	AA	BB	BB
1_12367292	1	47.09642209	AA	AA	BB	AA	BB	AA	AA	AA	BB	BB	AA	BB	AA	BB	AA	AA	AA	BB	BB	BB	BB	BB	AA	AA	-	AA	BB	BB	AA	AA	BB	BB	AA	BB	BB	AA	BB	BB	BB	BB	BB	BB	BB	BB	AA	BB	BB
1_12374515	1	47.09642214	AA	AA	BB	AA	BB	AA	AA	AA	BB	BB	AA	BB	AA	BB	AA	AA	AA	BB	BB	BB	BB	BB	AA	AA	-	AA	BB	BB	AA	AA	BB	BB	AA	BB	BB	AA	BB	BB	BB	BB	BB	BB	BB	BB	AA	BB	BB
1_12375729	1	47.09642219	AA	AA	BB	AA	BB	AA	AA	AA	BB	BB	AA	BB	AA	BB	AA	AA	AA	BB	BB	BB	BB	BB	AA	AA	-	AA	BB	BB	AA	AA	BB	BB	AA	BB	BB	AA	BB	BB	BB	BB	BB	BB	BB	BB	AA	BB	BB
1_12378822	1	47.09642224	AA	AA	BB	AA	BB	AA	AA	AA	BB	BB	AA	BB	AA	BB	AA	AA	AA	BB	BB	BB	BB	BB	AA	AA	-	AA	BB	BB	AA	AA	BB	BB	AA	BB	BB	AA	BB	BB	BB	BB	BB	BB	BB	BB	AA	BB	BB
1_12389797	1	47.09642229	AA	AA	BB	AA	BB	AA	AA	AA	BB	BB	AA	BB	AA	BB	AA	AA	AA	BB	BB	BB	BB	BB	AA	AA	-	AA	BB	BB	AA	AA	BB	BB	AA	BB	BB	AA	BB	BB	BB	BB	BB	BB	BB	BB	AA	BB	BB
1_12392795	1	47.09642234	AA	AA	BB	AA	BB	AA	AA	AA	BB	BB	AA	BB	AA	BB	AA	AA	AA	BB	BB	BB	BB	BB	AA	AA	-	AA	BB	BB	AA	AA	BB	BB	AA	BB	BB	AA	BB	BB	BB	BB	BB	BB	BB	BB	AA	BB	BB
1_12397648	1	47.09642239	-	-	-	-	-	-	-	-	-	-	-	-	-	-	-	-	-	-	-	-	-	-	-	-	-	-	-	-	-	-	-	-	-	-	-	-	-	-	-	-	-	-	-	-	-	-	-
1_12398442	1	47.09642244	-	-	-	-	-	-	-	-	-	-	-	-	-	-	-	-	-	-	-	-	-	-	-	-	-	-	-	-	-	-	-	-	-	-	-	-	-	-	-	-	-	-	-	-	-	-	-
1_12409356	1	47.09642249	-	-	-	-	-	-	-	-	-	-	-	-	-	-	-	-	-	-	-	-	-	-	-	-	-	-	-	-	-	-	-	-	-	-	-	-	-	-	-	-	-	-	-	-	-	-	-
1_12410573	1	47.09642254	AA	AA	BB	AA	BB	AA	AA	AA	BB	BB	AA	BB	AA	BB	AA	AA	AA	BB	BB	BB	BB	BB	AA	AA	-	AA	BB	BB	AA	AA	BB	BB	AA	BB	BB	AA	BB	BB	BB	BB	BB	BB	BB	BB	AA	BB	BB
1_12411061	1	47.09642259	AA	AA	BB	AA	BB	AA	AA	AA	BB	BB	AA	BB	AA	BB	AA	AA	AA	BB	BB	BB	BB	BB	AA	AA	-	AA	BB	BB	AA	AA	BB	BB	AA	BB	BB	AA	BB	BB	BB	BB	BB	BB	BB	BB	AA	BB	BB
1_12425323	1	47.09642264	AA	AA	BB	AA	BB	AA	AA	AA	BB	BB	AA	BB	AA	BB	AA	AA	AA	BB	BB	BB	BB	BB	AA	AA	-	AA	BB	BB	AA	AA	BB	BB	AA	BB	BB	AA	BB	BB	BB	BB	BB	BB	BB	BB	AA	BB	BB
1_12440296	1	47.09642269	-	-	-	-	-	-	-	-	-	-	-	-	-	-	-	-	-	-	-	-	-	-	-	-	-	-	-	-	-	-	-	-	-	-	-	-	-	-	-	-	-	-	-	-	-	-	-
1_12441026	1	47.09642274	AA	AA	BB	AA	BB	AA	AA	AA	BB	BB	AA	BB	AA	BB	AA	AA	AA	BB	BB	BB	BB	BB	AA	AA	-	AA	BB	BB	AA	AA	BB	BB	AA	BB	BB	AA	BB	BB	BB	BB	BB	BB	BB	BB	AA	BB	BB
1_12446161	1	47.09642279	AA	AA	BB	AA	BB	AA	AA	AA	BB	BB	AA	BB	AA	BB	AA	AA	AA	BB	BB	BB	BB	BB	AA	AA	-	AA	BB	BB	AA	AA	BB	BB	AA	BB	BB	AA	BB	BB	BB	BB	BB	BB	BB	BB	AA	BB	BB
1_12455384	1	47.09642284	AA	AA	BB	AA	BB	AA	AA	AA	BB	BB	AA	BB	AA	BB	AA	AA	AA	BB	BB	BB	BB	BB	AA	AA	-	AA	BB	BB	AA	AA	BB	BB	AA	BB	BB	AA	BB	BB	BB	BB	BB	BB	BB	BB	AA	BB	BB
1_12457068	1	47.09642289	AA	AA	BB	AA	BB	AA	AA	AA	BB	BB	AA	BB	AA	BB	AA	AA	AA	BB	BB	BB	BB	BB	AA	AA	-	AA	BB	BB	AA	AA	BB	BB	AA	BB	BB	AA	BB	BB	BB	BB	BB	BB	BB	BB	AA	BB	BB
1_12471548	1	48.15107123	AA	AA	BB	AA	BB	AA	AA	AA	BB	BB	AA	BB	AA	BB	AA	AA	AA	BB	BB	BB	BB	BB	AA	AA	BB	AA	BB	BB	AA	AA	BB	BB	AA	BB	BB	AA	BB	BB	BB	BB	BB	BB	BB	BB	AA	BB	BB
1_12479124	1	48.15107128	AA	AA	BB	AA	BB	AA	AA	AA	BB	BB	AA	BB	AA	BB	AA	AA	AA	BB	BB	BB	BB	BB	AA	AA	BB	AA	BB	BB	AA	AA	BB	BB	AA	BB	BB	AA	BB	BB	BB	BB	BB	BB	BB	BB	AA	BB	BB
1_12488470	1	48.15107133	AA	AA	BB	AA	BB	AA	AA	AA	BB	BB	AA	BB	AA	BB	AA	AA	AA	BB	BB	BB	BB	BB	AA	AA	BB	AA	BB	BB	AA	AA	BB	BB	AA	BB	BB	AA	BB	BB	BB	BB	BB	BB	BB	BB	AA	BB	BB
1_12495550	1	48.15107138	AA	AA	BB	AA	BB	AA	AA	AA	BB	BB	AA	BB	AA	BB	AA	AA	AA	BB	BB	BB	BB	BB	AA	AA	BB	AA	BB	BB	AA	AA	BB	BB	AA	BB	BB	AA	BB	BB	BB	BB	BB	BB	BB	BB	AA	BB	BB
1_12498577	1	48.15107143	AA	AA	BB	AA	BB	AA	AA	AA	BB	BB	AA	BB	AA	BB	AA	AA	AA	BB	BB	BB	BB	BB	AA	AA	BB	AA	BB	BB	AA	AA	BB	BB	AA	BB	BB	AA	BB	BB	BB	BB	BB	BB	BB	BB	AA	BB	BB
1_12503215	1	48.15107148	AA	AA	BB	AA	BB	AA	AA	AA	BB	BB	AA	BB	AA	BB	AA	AA	AA	BB	BB	BB	BB	BB	AA	AA	BB	AA	BB	BB	AA	AA	BB	BB	AA	BB	BB	AA	BB	BB	BB	BB	BB	BB	BB	BB	AA	BB	BB
1_12528446	1	48.15107153	AA	AA	BB	AA	BB	AA	AA	AA	BB	BB	AA	BB	AA	BB	AA	AA	AA	BB	BB	BB	BB	BB	AA	AA	BB	AA	BB	BB	AA	AA	BB	BB	AA	BB	BB	AA	BB	BB	BB	BB	BB	BB	BB	BB	AA	BB	BB
1_12530517	1	48.15107158	AA	AA	BB	AA	BB	AA	AA	AA	BB	BB	AA	BB	AA	BB	AA	AA	AA	BB	BB	BB	BB	BB	AA	AA	BB	AA	BB	BB	AA	AA	BB	BB	AA	BB	BB	AA	BB	BB	BB	BB	BB	BB	BB	BB	AA	BB	BB
1_12532410	1	48.15107163	AA	AA	BB	AA	BB	AA	AA	AA	BB	BB	AA	BB	AA	BB	AA	AA	AA	BB	BB	BB	BB	BB	AA	AA	BB	AA	BB	BB	AA	AA	BB	BB	AA	BB	BB	AA	BB	BB	BB	BB	BB	BB	BB	BB	AA	BB	BB
1_12542623	1	48.15107168	AA	AA	BB	AA	BB	AA	AA	AA	BB	BB	AA	BB	AA	BB	AA	AA	AA	BB	BB	BB	BB	BB	AA	AA	BB	AA	BB	BB	AA	AA	BB	BB	AA	BB	BB	AA	BB	BB	BB	BB	BB	BB	BB	BB	AA	BB	BB
1_12548812	1	48.15107173	-	-	-	-	-	-	-	-	-	-	-	-	-	-	-	-	-	-	-	-	-	-	-	-	-	-	-	-	-	-	-	-	-	-	-	-	-	-	-	-	-	-	-	-	-	-	-
1_12572341	1	48.15107178	AA	AA	BB	AA	BB	AA	AA	AA	BB	BB	AA	BB	AA	BB	AA	AA	AA	BB	BB	BB	BB	BB	AA	AA	BB	AA	BB	BB	AA	AA	BB	BB	AA	BB	BB	AA	BB	BB	BB	BB	BB	BB	BB	BB	AA	BB	BB
1_12595351	1	48.15107183	AA	AA	BB	AA	BB	AA	AA	AA	BB	BB	AA	BB	AA	BB	AA	AA	AA	BB	BB	BB	BB	BB	AA	AA	BB	AA	BB	BB	AA	AA	BB	BB	AA	BB	BB	AA	BB	BB	BB	BB	BB	BB	BB	BB	AA	BB	BB
1_12607581	1	48.15107188	AA	AA	BB	AA	BB	AA	AA	AA	BB	BB	AA	BB	AA	BB	AA	AA	AA	BB	BB	BB	BB	BB	AA	AA	BB	AA	BB	BB	AA	AA	BB	BB	AA	BB	BB	AA	BB	BB	BB	BB	BB	BB	BB	BB	AA	BB	BB
1_12608040	1	48.15107193	-	-	-	-	-	-	-	-	-	-	-	-	-	-	-	-	-	-	-	-	-	-	-	-	-	-	-	-	-	-	-	-	-	-	-	-	-	-	-	-	-	-	-	-	-	-	-
1_12609995	1	48.15107198	AA	AA	BB	AA	BB	AA	AA	AA	BB	BB	AA	BB	AA	BB	AA	AA	AA	BB	BB	BB	BB	BB	AA	AA	BB	AA	BB	BB	AA	AA	BB	BB	AA	BB	BB	AA	BB	BB	BB	BB	BB	BB	BB	BB	AA	BB	BB
1_12616869	1	49.93202008	AA	AA	-	AA	BB	AA	AA	AA	BB	BB	AA	BB	AA	BB	AA	AA	AA	BB	-	-	BB	BB	AA	AA	BB	-	BB	BB	AA	AA	BB	BB	AA	-	BB	AA	BB	BB	BB	BB	BB	BB	BB	-	AA	BB	-
1_12620204	1	49.93202013	AA	AA	-	AA	BB	AA	AA	AA	BB	BB	AA	BB	AA	BB	AA	AA	AA	BB	-	-	BB	BB	AA	AA	BB	-	BB	BB	AA	AA	BB	BB	AA	-	BB	AA	BB	BB	BB	BB	BB	BB	BB	-	AA	BB	-
1_12628137	1	49.93202018	-	-	-	-	-	-	-	-	-	-	-	-	-	-	-	-	-	-	-	-	-	-	-	-	-	-	-	-	-	-	-	-	-	-	-	-	-	-	-	-	-	-	-	-	-	-	-
1_12654227	1	49.93202023	AA	AA	-	AA	BB	AA	AA	AA	BB	BB	AA	BB	AA	BB	AA	AA	AA	BB	-	-	BB	BB	AA	AA	BB	-	BB	BB	AA	AA	BB	BB	AA	-	BB	AA	BB	BB	BB	BB	BB	BB	BB	-	AA	BB	-
1_12687592	1	49.93202028	AA	AA	-	AA	BB	AA	AA	AA	BB	BB	AA	BB	AA	BB	AA	AA	AA	BB	-	-	BB	BB	AA	AA	BB	-	BB	BB	AA	AA	BB	BB	AA	-	BB	AA	BB	BB	BB	BB	BB	BB	BB	-	AA	BB	-
1_12689440	1	49.93202033	AA	AA	-	AA	BB	AA	AA	AA	BB	BB	AA	BB	AA	BB	AA	AA	AA	BB	-	-	BB	BB	AA	AA	BB	-	BB	BB	AA	AA	BB	BB	AA	-	BB	AA	BB	BB	BB	BB	BB	BB	BB	-	AA	BB	-
1_12697600	1	49.93202038	AA	AA	-	AA	BB	AA	AA	AA	BB	BB	AA	BB	AA	BB	AA	AA	AA	BB	-	-	BB	BB	AA	AA	BB	-	BB	BB	AA	AA	BB	BB	AA	-	BB	AA	BB	BB	BB	BB	BB	BB	BB	-	AA	BB	-
1_12729788	1	49.93202043	-	-	-	-	-	-	-	-	-	-	-	-	-	-	-	-	-	-	-	-	-	-	-	-	-	-	-	-	-	-	-	-	-	-	-	-	-	-	-	-	-	-	-	-	-	-	-
1_12730910	1	49.93202048	AA	AA	-	AA	BB	AA	AA	AA	BB	BB	AA	BB	AA	BB	AA	AA	AA	BB	-	-	BB	BB	AA	AA	BB	-	BB	BB	AA	AA	BB	BB	AA	-	BB	AA	BB	BB	BB	BB	BB	BB	BB	-	AA	BB	-
1_12744261	1	49.93202053	-	-	-	-	-	-	-	-	-	-	-	-	-	-	-	-	-	-	-	-	-	-	-	-	-	-	-	-	-	-	-	-	-	-	-	-	-	-	-	-	-	-	-	-	-	-	-
1_12749644	1	49.93202058	AA	AA	-	AA	BB	AA	AA	AA	BB	BB	AA	BB	AA	BB	AA	AA	AA	BB	-	-	BB	BB	AA	AA	BB	-	BB	BB	AA	AA	BB	BB	AA	-	BB	AA	BB	BB	BB	BB	BB	BB	BB	-	AA	BB	-
1_12849930	1	49.93202063	AA	AA	-	AA	BB	AA	AA	AA	BB	BB	AA	BB	AA	BB	AA	AA	AA	BB	-	-	BB	BB	AA	AA	BB	-	BB	BB	AA	AA	BB	BB	AA	-	BB	AA	BB	BB	BB	BB	BB	BB	BB	-	AA	BB	-
1_12976638	1	49.93202068	AA	AA	-	AA	BB	AA	AA	AA	BB	BB	AA	BB	AA	BB	AA	AA	AA	BB	-	-	BB	BB	AA	AA	BB	-	BB	BB	AA	AA	BB	BB	AA	-	BB	AA	BB	BB	BB	BB	BB	BB	BB	-	AA	BB	-
1_13012494	1	49.93202073	AA	AA	-	AA	BB	AA	AA	AA	BB	BB	AA	BB	AA	BB	AA	AA	AA	BB	-	-	BB	BB	AA	AA	BB	-	BB	BB	AA	AA	BB	BB	AA	-	BB	AA	BB	BB	BB	BB	BB	BB	BB	-	AA	BB	-
1_13013023	1	49.93202078	AA	AA	-	AA	BB	AA	AA	AA	BB	BB	AA	BB	AA	BB	AA	AA	AA	BB	-	-	BB	BB	AA	AA	BB	-	BB	BB	AA	AA	BB	BB	AA	-	BB	AA	BB	BB	BB	BB	BB	BB	BB	-	AA	BB	-
1_13035737	1	49.93202083	AA	AA	-	AA	BB	AA	AA	AA	BB	BB	AA	BB	AA	BB	AA	AA	AA	BB	-	-	BB	BB	AA	AA	BB	-	BB	BB	AA	AA	BB	BB	AA	-	BB	AA	BB	BB	BB	BB	BB	BB	BB	-	AA	BB	-
1_13042923	1	49.93202088	AA	AA	-	AA	BB	AA	AA	AA	BB	BB	AA	BB	AA	BB	AA	AA	AA	BB	-	-	BB	BB	AA	AA	BB	-	BB	BB	AA	AA	BB	BB	AA	-	BB	AA	BB	BB	BB	BB	BB	BB	BB	-	AA	BB	-
1_13047665	1	49.93202093	AA	AA	-	AA	BB	AA	AA	AA	BB	BB	AA	BB	AA	BB	AA	AA	AA	BB	-	-	BB	BB	AA	AA	BB	-	BB	BB	AA	AA	BB	BB	AA	-	BB	AA	BB	BB	BB	BB	BB	BB	BB	-	AA	BB	-
1_13070853	1	52.77839792	AA	AA	-	AA	BB	AA	AA	AA	BB	BB	AA	BB	AA	BB	AA	AA	AA	BB	-	-	BB	BB	AA	AA	BB	-	BB	BB	AA	AA	BB	BB	AA	-	BB	AA	BB	BB	BB	BB	BB	BB	BB	-	AA	BB	-
1_13071106	1	52.77839797	AA	AA	-	AA	BB	AA	AA	AA	BB	BB	AA	BB	AA	BB	AA	AA	AA	BB	-	-	BB	BB	AA	AA	BB	-	BB	BB	AA	AA	BB	BB	AA	-	BB	AA	BB	BB	BB	BB	BB	BB	BB	-	AA	BB	-
1_13074884	1	52.77839802	AA	AA	-	AA	BB	AA	AA	AA	BB	BB	AA	BB	AA	BB	AA	AA	AA	BB	-	-	BB	BB	AA	AA	BB	-	BB	BB	AA	AA	BB	BB	AA	-	BB	AA	BB	BB	BB	BB	BB	BB	BB	-	AA	BB	-
1_13075638	1	52.77839807	AA	AA	-	AA	BB	AA	AA	AA	BB	BB	AA	BB	AA	BB	AA	AA	AA	BB	-	-	BB	BB	AA	AA	BB	-	BB	BB	AA	AA	BB	BB	AA	-	BB	AA	BB	BB	BB	BB	BB	BB	BB	-	AA	BB	-
1_13077108	1	52.77839812	-	-	-	-	-	-	-	-	-	-	-	-	-	-	-	-	-	-	-	-	-	-	-	-	-	-	-	-	-	-	-	-	-	-	-	-	-	-	-	-	-	-	-	-	-	-	-
1_13086582	1	52.77839817	AA	AA	-	AA	BB	AA	AA	AA	BB	BB	AA	BB	AA	BB	AA	AA	AA	BB	-	-	BB	BB	AA	AA	BB	-	BB	BB	AA	AA	BB	BB	AA	-	BB	AA	BB	BB	BB	BB	BB	BB	BB	-	AA	BB	-
1_13089066	1	52.77839822	AA	AA	-	AA	BB	AA	AA	AA	BB	BB	AA	BB	AA	BB	AA	AA	AA	BB	-	-	BB	BB	AA	AA	BB	-	BB	BB	AA	AA	BB	BB	AA	-	BB	AA	BB	BB	BB	BB	BB	BB	BB	-	AA	BB	-
1_13101397	1	52.77839827	AA	AA	-	AA	BB	AA	AA	AA	BB	BB	AA	BB	AA	BB	AA	AA	AA	BB	-	-	BB	BB	AA	AA	BB	-	BB	BB	AA	AA	BB	BB	AA	-	BB	AA	BB	BB	BB	BB	BB	BB	BB	-	AA	BB	-
1_13102161	1	52.77839832	AA	AA	-	AA	BB	AA	AA	AA	BB	BB	AA	BB	AA	BB	AA	AA	AA	BB	-	-	BB	BB	AA	AA	BB	-	BB	BB	AA	AA	BB	BB	AA	-	BB	AA	BB	BB	BB	BB	BB	BB	BB	-	AA	BB	-
1_13113818	1	52.77839837	AA	AA	-	AA	BB	AA	AA	AA	BB	BB	AA	BB	AA	BB	AA	AA	AA	BB	-	-	BB	BB	AA	AA	BB	-	BB	BB	AA	AA	BB	BB	AA	-	BB	AA	BB	BB	BB	BB	BB	BB	BB	-	AA	BB	-
1_13116026	1	52.77839842	AA	AA	-	AA	BB	AA	AA	AA	BB	BB	AA	BB	AA	BB	AA	AA	AA	BB	-	-	BB	BB	AA	AA	BB	-	BB	BB	AA	AA	BB	BB	AA	-	BB	AA	BB	BB	BB	BB	BB	BB	BB	-	AA	BB	-
1_13116468	1	52.77839847	-	-	-	-	-	-	-	-	-	-	-	-	-	-	-	-	-	-	-	-	-	-	-	-	-	-	-	-	-	-	-	-	-	-	-	-	-	-	-	-	-	-	-	-	-	-	-
1_13117647	1	52.77839852	AA	AA	-	AA	BB	AA	AA	AA	BB	BB	AA	BB	AA	BB	AA	AA	AA	BB	-	-	BB	BB	AA	AA	BB	-	BB	BB	AA	AA	BB	BB	AA	-	BB	AA	BB	BB	BB	BB	BB	BB	BB	-	AA	BB	-
1_13118709	1	52.77839857	-	-	-	-	-	-	-	-	-	-	-	-	-	-	-	-	-	-	-	-	-	-	-	-	-	-	-	-	-	-	-	-	-	-	-	-	-	-	-	-	-	-	-	-	-	-	-
1_13128978	1	52.77839862	-	-	-	-	-	-	-	-	-	-	-	-	-	-	-	-	-	-	-	-	-	-	-	-	-	-	-	-	-	-	-	-	-	-	-	-	-	-	-	-	-	-	-	-	-	-	-
1_13145640	1	52.77839867	-	-	-	-	-	-	-	-	-	-	-	-	-	-	-	-	-	-	-	-	-	-	-	-	-	-	-	-	-	-	-	-	-	-	-	-	-	-	-	-	-	-	-	-	-	-	-
1_13159318	1	52.77839872	AA	AA	-	AA	BB	AA	AA	AA	BB	BB	AA	BB	AA	BB	AA	AA	AA	BB	-	-	BB	BB	AA	AA	BB	-	BB	BB	AA	AA	BB	BB	AA	-	BB	AA	BB	BB	BB	BB	BB	BB	BB	-	AA	BB	-
1_13160682	1	52.77839877	AA	AA	-	AA	BB	AA	AA	AA	BB	BB	AA	BB	AA	BB	AA	AA	AA	BB	-	-	BB	BB	AA	AA	BB	-	BB	BB	AA	AA	BB	BB	AA	-	BB	AA	BB	BB	BB	BB	BB	BB	BB	-	AA	BB	-
1_13163011	1	52.77839882	-	-	-	-	-	-	-	-	-	-	-	-	-	-	-	-	-	-	-	-	-	-	-	-	-	-	-	-	-	-	-	-	-	-	-	-	-	-	-	-	-	-	-	-	-	-	-
1_13163619	1	52.77839887	-	-	-	-	-	-	-	-	-	-	-	-	-	-	-	-	-	-	-	-	-	-	-	-	-	-	-	-	-	-	-	-	-	-	-	-	-	-	-	-	-	-	-	-	-	-	-
1_13169013	1	52.77839892	-	-	-	-	-	-	-	-	-	-	-	-	-	-	-	-	-	-	-	-	-	-	-	-	-	-	-	-	-	-	-	-	-	-	-	-	-	-	-	-	-	-	-	-	-	-	-
1_13169413	1	52.77839897	-	-	-	-	-	-	-	-	-	-	-	-	-	-	-	-	-	-	-	-	-	-	-	-	-	-	-	-	-	-	-	-	-	-	-	-	-	-	-	-	-	-	-	-	-	-	-
1_13196658	1	52.77839902	AA	AA	-	AA	BB	AA	AA	AA	BB	BB	AA	BB	AA	BB	AA	AA	AA	BB	-	-	BB	BB	AA	AA	BB	-	BB	BB	AA	AA	BB	BB	AA	-	BB	AA	BB	BB	BB	BB	BB	BB	BB	-	AA	BB	-
1_13199206	1	52.77839907	AA	AA	-	AA	BB	AA	AA	AA	BB	BB	AA	BB	AA	BB	AA	AA	AA	BB	-	-	BB	BB	AA	AA	BB	-	BB	BB	AA	AA	BB	BB	AA	-	BB	AA	BB	BB	BB	BB	BB	BB	BB	-	AA	BB	-
1_13199394	1	52.77839912	AA	AA	-	AA	BB	AA	AA	AA	BB	BB	AA	BB	AA	BB	AA	AA	AA	BB	-	-	BB	BB	AA	AA	BB	-	BB	BB	AA	AA	BB	BB	AA	-	BB	AA	BB	BB	BB	BB	BB	BB	BB	-	AA	BB	-
1_13199760	1	52.77839917	AA	AA	-	AA	BB	AA	AA	AA	BB	BB	AA	BB	AA	BB	AA	AA	AA	BB	-	-	BB	BB	AA	AA	BB	-	BB	BB	AA	AA	BB	BB	AA	-	BB	AA	BB	BB	BB	BB	BB	BB	BB	-	AA	BB	-
1_13201776	1	52.77839922	AA	AA	-	AA	BB	AA	AA	AA	BB	BB	AA	BB	AA	BB	AA	AA	AA	BB	-	-	BB	BB	AA	AA	BB	-	BB	BB	AA	AA	BB	BB	AA	-	BB	AA	BB	BB	BB	BB	BB	BB	BB	-	AA	BB	-
1_13203790	1	52.77839927	AA	AA	-	AA	BB	AA	AA	AA	BB	BB	AA	BB	AA	BB	AA	AA	AA	BB	-	-	BB	BB	AA	AA	BB	-	BB	BB	AA	AA	BB	BB	AA	-	BB	AA	BB	BB	BB	BB	BB	BB	BB	-	AA	BB	-
1_13205542	1	52.77839932	AA	AA	-	AA	BB	AA	AA	AA	BB	BB	AA	BB	AA	BB	AA	AA	AA	BB	-	-	BB	BB	AA	AA	BB	-	BB	BB	AA	AA	BB	BB	AA	-	BB	AA	BB	BB	BB	BB	BB	BB	BB	-	AA	BB	-
1_13207279	1	52.77839937	AA	AA	-	AA	BB	AA	AA	AA	BB	BB	AA	BB	AA	BB	AA	AA	AA	BB	-	-	BB	BB	AA	AA	BB	-	BB	BB	AA	AA	BB	BB	AA	-	BB	AA	BB	BB	BB	BB	BB	BB	BB	-	AA	BB	-
1_13207661	1	52.77839942	AA	AA	-	AA	BB	AA	AA	AA	BB	BB	AA	BB	AA	BB	AA	AA	AA	BB	-	-	BB	BB	AA	AA	BB	-	BB	BB	AA	AA	BB	BB	AA	-	BB	AA	BB	BB	BB	BB	BB	BB	BB	-	AA	BB	-
1_13214799	1	54.04477299	AA	AA	-	AA	BB	AA	AA	AA	BB	BB	AA	BB	AA	BB	AA	AA	AA	BB	-	-	BB	BB	AA	AA	BB	-	BB	BB	AA	AA	BB	BB	AA	-	BB	AA	BB	BB	BB	BB	BB	BB	BB	-	AA	BB	-
1_13224278	1	54.04477304	-	-	-	-	-	-	-	-	-	-	-	-	-	-	-	-	-	-	-	-	-	-	-	-	-	-	-	-	-	-	-	-	-	-	-	-	-	-	-	-	-	-	-	-	-	-	-
1_13236520	1	54.04477309	AA	AA	-	AA	BB	AA	AA	AA	BB	BB	AA	BB	AA	BB	AA	AA	AA	BB	-	-	BB	BB	AA	AA	BB	-	BB	BB	AA	AA	BB	BB	AA	-	BB	AA	BB	BB	BB	BB	BB	BB	BB	-	AA	BB	-
1_13239786	1	54.04477314	AA	AA	-	AA	BB	AA	AA	AA	BB	BB	AA	BB	AA	BB	AA	AA	AA	BB	-	-	BB	BB	AA	AA	BB	-	BB	BB	AA	AA	BB	BB	AA	-	BB	AA	BB	BB	BB	BB	BB	BB	BB	-	AA	BB	-
1_13265855	1	54.04477319	AA	AA	-	AA	BB	AA	AA	AA	BB	BB	AA	BB	AA	BB	AA	AA	AA	BB	-	-	BB	BB	AA	AA	BB	-	BB	BB	AA	AA	BB	BB	AA	-	BB	AA	BB	BB	BB	BB	BB	BB	BB	-	AA	BB	-
1_13266150	1	54.04477324	AA	AA	-	AA	BB	AA	AA	AA	BB	BB	AA	BB	AA	BB	AA	AA	AA	BB	-	-	BB	BB	AA	AA	BB	-	BB	BB	AA	AA	BB	BB	AA	-	BB	AA	BB	BB	BB	BB	BB	BB	BB	-	AA	BB	-
1_13290742	1	54.04477329	AA	AA	-	AA	BB	AA	AA	AA	BB	BB	AA	BB	AA	BB	AA	AA	AA	BB	-	-	BB	BB	AA	AA	BB	-	BB	BB	AA	AA	BB	BB	AA	-	BB	AA	BB	BB	BB	BB	BB	BB	BB	-	AA	BB	-
1_13304942	1	54.04477334	AA	AA	-	AA	BB	AA	AA	AA	BB	BB	AA	BB	AA	BB	AA	AA	AA	BB	-	-	BB	BB	AA	AA	BB	-	BB	BB	AA	AA	BB	BB	AA	-	BB	AA	BB	BB	BB	BB	BB	BB	BB	-	AA	BB	-
1_13332314	1	54.32643741	AA	AA	-	AA	BB	AA	AA	AA	BB	BB	AA	BB	AA	BB	AA	AA	AA	BB	-	-	BB	BB	AA	AA	BB	-	BB	BB	AA	AA	BB	BB	AA	-	BB	AA	BB	BB	BB	BB	BB	BB	BB	-	AA	BB	-
1_13336210	1	54.32643746	-	-	-	-	-	-	-	-	-	-	-	-	-	-	-	-	-	-	-	-	-	-	-	-	-	-	-	-	-	-	-	-	-	-	-	-	-	-	-	-	-	-	-	-	-	-	-
1_13336465	1	54.32643751	-	-	-	-	-	-	-	-	-	-	-	-	-	-	-	-	-	-	-	-	-	-	-	-	-	-	-	-	-	-	-	-	-	-	-	-	-	-	-	-	-	-	-	-	-	-	-
1_13337592	1	54.32643756	AA	AA	-	AA	BB	AA	AA	AA	BB	BB	AA	BB	AA	BB	AA	AA	AA	BB	-	-	BB	BB	AA	AA	BB	-	BB	BB	AA	AA	BB	BB	AA	-	BB	AA	BB	BB	BB	BB	BB	BB	BB	-	AA	BB	-
1_13337782	1	54.32643761	AA	AA	-	AA	BB	AA	AA	AA	BB	BB	AA	BB	AA	BB	AA	AA	AA	BB	-	-	BB	BB	AA	AA	BB	-	BB	BB	AA	AA	BB	BB	AA	-	BB	AA	BB	BB	BB	BB	BB	BB	BB	-	AA	BB	-
1_13340097	1	54.32643766	AA	AA	-	AA	BB	AA	AA	AA	BB	BB	AA	BB	AA	BB	AA	AA	AA	BB	-	-	BB	BB	AA	AA	BB	-	BB	BB	AA	AA	BB	BB	AA	-	BB	AA	BB	BB	BB	BB	BB	BB	BB	-	AA	BB	-
1_13343595	1	54.32643771	AA	AA	-	AA	BB	AA	AA	AA	BB	BB	AA	BB	AA	BB	AA	AA	AA	BB	-	-	BB	BB	AA	AA	BB	-	BB	BB	AA	AA	BB	BB	AA	-	BB	AA	BB	BB	BB	BB	BB	BB	BB	-	AA	BB	-
1_13351685	1	54.32643776	AA	AA	-	AA	BB	AA	AA	AA	BB	BB	AA	BB	AA	BB	AA	AA	AA	BB	-	-	BB	BB	AA	AA	BB	-	BB	BB	AA	AA	BB	BB	AA	-	BB	AA	BB	BB	BB	BB	BB	BB	BB	-	AA	BB	-
1_13370159	1	54.32643781	AA	AA	-	AA	BB	AA	AA	AA	BB	BB	AA	BB	AA	BB	AA	AA	AA	BB	-	-	BB	BB	AA	AA	BB	-	BB	BB	AA	AA	BB	BB	AA	-	BB	AA	BB	BB	BB	BB	BB	BB	BB	-	AA	BB	-
1_13377999	1	54.32643786	AA	AA	-	AA	BB	AA	AA	AA	BB	BB	AA	BB	AA	BB	AA	AA	AA	BB	-	-	BB	BB	AA	AA	BB	-	BB	BB	AA	AA	BB	BB	AA	-	BB	AA	BB	BB	BB	BB	BB	BB	BB	-	AA	BB	-
1_13384186	1	54.32643791	AA	AA	-	AA	BB	AA	AA	AA	BB	BB	AA	BB	AA	BB	AA	AA	AA	BB	-	-	BB	BB	AA	AA	BB	-	BB	BB	AA	AA	BB	BB	AA	-	BB	AA	BB	BB	BB	BB	BB	BB	BB	-	AA	BB	-
1_13392024	1	55.06612327	AA	AA	-	AA	BB	AA	AA	AA	BB	BB	AA	BB	AA	BB	AA	AA	AA	BB	-	-	BB	BB	AA	AA	BB	-	BB	BB	AA	AA	BB	BB	AA	-	BB	AA	BB	BB	BB	BB	BB	BB	BB	-	AA	BB	-
1_13392958	1	55.06612332	AA	AA	-	AA	BB	AA	AA	AA	BB	BB	AA	BB	AA	BB	AA	AA	AA	BB	-	-	BB	BB	AA	AA	BB	-	BB	BB	AA	AA	BB	BB	AA	-	BB	AA	BB	BB	BB	BB	BB	BB	BB	-	AA	BB	-
1_13393036	1	55.06612337	-	-	-	-	-	-	-	-	-	-	-	-	-	-	-	-	-	-	-	-	-	-	-	-	-	-	-	-	-	-	-	-	-	-	-	-	-	-	-	-	-	-	-	-	-	-	-
1_13394427	1	55.06612342	AA	AA	-	AA	BB	AA	AA	AA	BB	BB	AA	BB	AA	BB	AA	AA	AA	BB	-	-	BB	BB	AA	AA	BB	-	BB	BB	AA	AA	BB	BB	AA	-	BB	AA	BB	BB	BB	BB	BB	BB	BB	-	AA	BB	-
1_13405013	1	55.06612347	AA	AA	-	AA	BB	AA	AA	AA	BB	BB	AA	BB	AA	BB	AA	AA	AA	BB	-	-	BB	BB	AA	AA	BB	-	BB	BB	AA	AA	BB	BB	AA	-	BB	AA	BB	BB	BB	BB	BB	BB	BB	-	AA	BB	-
1_13414404	1	55.06612352	AA	AA	-	AA	BB	AA	AA	AA	BB	BB	AA	BB	AA	BB	AA	AA	AA	BB	-	-	BB	BB	AA	AA	BB	-	BB	BB	AA	AA	BB	BB	AA	-	BB	AA	BB	BB	BB	BB	BB	BB	BB	-	AA	BB	-
1_13415444	1	55.06612357	AA	AA	-	AA	BB	AA	AA	AA	BB	BB	AA	BB	AA	BB	AA	AA	AA	BB	-	-	BB	BB	AA	AA	BB	-	BB	BB	AA	AA	BB	BB	AA	-	BB	AA	BB	BB	BB	BB	BB	BB	BB	-	AA	BB	-
1_13420584	1	55.06612362	-	-	-	-	-	-	-	-	-	-	-	-	-	-	-	-	-	-	-	-	-	-	-	-	-	-	-	-	-	-	-	-	-	-	-	-	-	-	-	-	-	-	-	-	-	-	-
1_13425811	1	55.06612367	AA	AA	-	AA	BB	AA	AA	AA	BB	BB	AA	BB	AA	BB	AA	AA	AA	BB	-	-	BB	BB	AA	AA	BB	-	BB	BB	AA	AA	BB	BB	AA	-	BB	AA	BB	BB	BB	BB	BB	BB	BB	-	AA	BB	-
1_13426925	1	55.06612372	AA	AA	-	AA	BB	AA	AA	AA	BB	BB	AA	BB	AA	BB	AA	AA	AA	BB	-	-	BB	BB	AA	AA	BB	-	BB	BB	AA	AA	BB	BB	AA	-	BB	AA	BB	BB	BB	BB	BB	BB	BB	-	AA	BB	-
1_13427148	1	55.06612377	-	-	-	-	-	-	-	-	-	-	-	-	-	-	-	-	-	-	-	-	-	-	-	-	-	-	-	-	-	-	-	-	-	-	-	-	-	-	-	-	-	-	-	-	-	-	-
1_13445782	1	55.06612382	AA	AA	-	AA	BB	AA	AA	AA	BB	BB	AA	BB	AA	BB	AA	AA	AA	BB	-	-	BB	BB	AA	AA	BB	-	BB	BB	AA	AA	BB	BB	AA	-	BB	AA	BB	BB	BB	BB	BB	BB	BB	-	AA	BB	-
1_13459935	1	55.06612387	AA	AA	-	AA	BB	AA	AA	AA	BB	BB	AA	BB	AA	BB	AA	AA	AA	BB	-	-	BB	BB	AA	AA	BB	-	BB	BB	AA	AA	BB	BB	AA	-	BB	AA	BB	BB	BB	BB	BB	BB	BB	-	AA	BB	-
1_13461006	1	55.06612392	AA	AA	-	AA	BB	AA	AA	AA	BB	BB	AA	BB	AA	BB	AA	AA	AA	BB	-	-	BB	BB	AA	AA	BB	-	BB	BB	AA	AA	BB	BB	AA	-	BB	AA	BB	BB	BB	BB	BB	BB	BB	-	AA	BB	-
1_13490789	1	55.06612397	AA	AA	-	AA	BB	AA	AA	AA	BB	BB	AA	BB	AA	BB	AA	AA	AA	BB	-	-	BB	BB	AA	AA	BB	-	BB	BB	AA	AA	BB	BB	AA	-	BB	AA	BB	BB	BB	BB	BB	BB	BB	-	AA	BB	-
1_13490832	1	55.06612402	AA	AA	-	AA	BB	AA	AA	AA	BB	BB	AA	BB	AA	BB	AA	AA	AA	BB	-	-	BB	BB	AA	AA	BB	-	BB	BB	AA	AA	BB	BB	AA	-	BB	AA	BB	BB	BB	BB	BB	BB	BB	-	AA	BB	-
1_13491696	1	55.06612407	AA	AA	-	AA	BB	AA	AA	AA	BB	BB	AA	BB	AA	BB	AA	AA	AA	BB	-	-	BB	BB	AA	AA	BB	-	BB	BB	AA	AA	BB	BB	AA	-	BB	AA	BB	BB	BB	BB	BB	BB	BB	-	AA	BB	-
1_13492390	1	55.06612412	AA	AA	-	AA	BB	AA	AA	AA	BB	BB	AA	BB	AA	BB	AA	AA	AA	BB	-	-	BB	BB	AA	AA	BB	-	BB	BB	AA	AA	BB	BB	AA	-	BB	AA	BB	BB	BB	BB	BB	BB	BB	-	AA	BB	-
1_13494071	1	55.06612417	AA	AA	-	AA	BB	AA	AA	AA	BB	BB	AA	BB	AA	BB	AA	AA	AA	BB	-	-	BB	BB	AA	AA	BB	-	BB	BB	AA	AA	BB	BB	AA	-	BB	AA	BB	BB	BB	BB	BB	BB	BB	-	AA	BB	-
1_13499799	1	55.06612422	AA	AA	-	AA	BB	AA	AA	AA	BB	BB	AA	BB	AA	BB	AA	AA	AA	BB	-	-	BB	BB	AA	AA	BB	-	BB	BB	AA	AA	BB	BB	AA	-	BB	AA	BB	BB	BB	BB	BB	BB	BB	-	AA	BB	-
1_13503130	1	55.06612427	-	-	-	-	-	-	-	-	-	-	-	-	-	-	-	-	-	-	-	-	-	-	-	-	-	-	-	-	-	-	-	-	-	-	-	-	-	-	-	-	-	-	-	-	-	-	-
1_13508560	1	55.06612432	AA	AA	-	AA	BB	AA	AA	AA	BB	BB	AA	BB	AA	BB	AA	AA	AA	BB	-	-	BB	BB	AA	AA	BB	-	BB	BB	AA	AA	BB	BB	AA	-	BB	AA	BB	BB	BB	BB	BB	BB	BB	-	AA	BB	-
1_13515502	1	55.06612437	-	-	-	-	-	-	-	-	-	-	-	-	-	-	-	-	-	-	-	-	-	-	-	-	-	-	-	-	-	-	-	-	-	-	-	-	-	-	-	-	-	-	-	-	-	-	-
1_13525872	1	55.06612442	AA	AA	-	AA	BB	AA	AA	AA	BB	BB	AA	BB	AA	BB	AA	AA	AA	BB	-	-	BB	BB	AA	AA	BB	-	BB	BB	AA	AA	BB	BB	AA	-	BB	AA	BB	BB	BB	BB	BB	BB	BB	-	AA	BB	-
1_13529317	1	55.06612447	AA	AA	-	AA	BB	AA	AA	AA	BB	BB	AA	BB	AA	BB	AA	AA	AA	BB	-	-	BB	BB	AA	AA	BB	-	BB	BB	AA	AA	BB	BB	AA	-	BB	AA	BB	BB	BB	BB	BB	BB	BB	-	AA	BB	-
1_13555096	1	55.06612452	AA	AA	-	AA	BB	AA	AA	AA	BB	BB	AA	BB	AA	BB	AA	AA	AA	BB	-	-	BB	BB	AA	AA	BB	-	BB	BB	AA	AA	BB	BB	AA	-	BB	AA	BB	BB	BB	BB	BB	BB	BB	-	AA	BB	-
1_13559554	1	55.06612457	AA	AA	-	AA	BB	AA	AA	AA	BB	BB	AA	BB	AA	BB	AA	AA	AA	BB	-	-	BB	BB	AA	AA	BB	-	BB	BB	AA	AA	BB	BB	AA	-	BB	AA	BB	BB	BB	BB	BB	BB	BB	-	AA	BB	-
1_13562036	1	55.06612462	AA	AA	-	AA	BB	AA	AA	AA	BB	BB	AA	BB	AA	BB	AA	AA	AA	BB	-	AA	BB	BB	AA	AA	BB	-	BB	BB	AA	AA	BB	BB	AA	AA	BB	AA	BB	BB	BB	BB	BB	BB	BB	AA	AA	BB	AA
1_13564144	1	55.33435173	AA	AA	AA	AA	BB	AA	AA	AA	BB	BB	AA	BB	AA	BB	AA	AA	AA	BB	-	AA	BB	BB	AA	AA	BB	BB	BB	BB	AA	AA	BB	BB	AA	AA	BB	AA	BB	BB	BB	BB	BB	BB	BB	AA	AA	BB	AA
1_13576653	1	55.33435178	AA	AA	AA	AA	BB	AA	AA	AA	BB	BB	AA	BB	AA	BB	AA	AA	AA	BB	-	AA	BB	BB	AA	AA	BB	BB	BB	BB	AA	AA	BB	BB	AA	AA	BB	AA	BB	BB	BB	BB	BB	BB	BB	AA	AA	BB	AA
1_13599039	1	55.33435183	AA	AA	AA	AA	BB	AA	AA	AA	BB	BB	AA	BB	AA	BB	AA	AA	AA	BB	-	AA	BB	BB	AA	AA	BB	BB	BB	BB	AA	AA	BB	BB	AA	AA	BB	AA	BB	BB	BB	BB	BB	BB	BB	AA	AA	BB	AA
1_13604706	1	55.33435188	AA	AA	AA	AA	BB	AA	AA	AA	BB	BB	AA	BB	AA	BB	AA	AA	AA	BB	-	AA	BB	BB	AA	AA	BB	BB	BB	BB	AA	AA	BB	BB	AA	AA	BB	AA	BB	BB	BB	BB	BB	BB	BB	AA	AA	BB	AA
1_13607585	1	55.33435193	AA	AA	AA	AA	BB	AA	AA	AA	BB	BB	AA	BB	AA	BB	AA	AA	AA	BB	-	AA	BB	BB	AA	AA	BB	BB	BB	BB	AA	AA	BB	BB	AA	AA	BB	AA	BB	BB	BB	BB	BB	BB	BB	AA	AA	BB	AA
1_13609135	1	55.33435198	AA	AA	AA	AA	BB	AA	AA	AA	BB	BB	AA	BB	AA	BB	AA	AA	AA	BB	-	AA	BB	BB	AA	AA	BB	BB	BB	BB	AA	AA	BB	BB	AA	AA	BB	AA	BB	BB	BB	BB	BB	BB	BB	AA	AA	BB	AA
1_13613039	1	55.33435203	-	-	-	-	-	-	-	-	-	-	-	-	-	-	-	-	-	-	-	-	-	-	-	-	-	-	-	-	-	-	-	-	-	-	-	-	-	-	-	-	-	-	-	-	-	-	-
1_13622913	1	55.33435208	-	-	-	-	-	-	-	-	-	-	-	-	-	-	-	-	-	-	-	-	-	-	-	-	-	-	-	-	-	-	-	-	-	-	-	-	-	-	-	-	-	-	-	-	-	-	-
1_13631966	1	55.33435213	AA	AA	AA	AA	BB	AA	AA	AA	BB	BB	AA	BB	AA	BB	AA	AA	AA	BB	-	AA	BB	BB	AA	AA	BB	BB	BB	BB	AA	AA	BB	BB	AA	AA	BB	AA	BB	BB	BB	BB	BB	BB	BB	AA	AA	BB	AA
1_13635433	1	55.33435218	AA	AA	AA	AA	BB	AA	AA	AA	BB	BB	AA	BB	AA	BB	AA	AA	AA	BB	-	AA	BB	BB	AA	AA	BB	BB	BB	BB	AA	AA	BB	BB	AA	AA	BB	AA	BB	BB	BB	BB	BB	BB	BB	AA	AA	BB	AA
1_13637413	1	55.33435223	AA	AA	AA	AA	BB	AA	AA	AA	BB	BB	AA	BB	AA	BB	AA	AA	AA	BB	-	AA	BB	BB	AA	AA	BB	BB	BB	BB	AA	AA	BB	BB	AA	AA	BB	AA	BB	BB	BB	BB	BB	BB	BB	AA	AA	BB	AA
1_13640668	1	55.33435228	-	-	-	-	-	-	-	-	-	-	-	-	-	-	-	-	-	-	-	-	-	-	-	-	-	-	-	-	-	-	-	-	-	-	-	-	-	-	-	-	-	-	-	-	-	-	-
1_13643419	1	55.33435233	AA	AA	AA	AA	BB	AA	AA	AA	BB	BB	AA	BB	AA	BB	AA	AA	AA	BB	-	AA	BB	BB	AA	AA	BB	BB	BB	BB	AA	AA	BB	BB	AA	AA	BB	AA	BB	BB	BB	BB	BB	BB	BB	AA	AA	BB	AA
1_13654087	1	55.33435238	-	-	-	-	-	-	-	-	-	-	-	-	-	-	-	-	-	-	-	-	-	-	-	-	-	-	-	-	-	-	-	-	-	-	-	-	-	-	-	-	-	-	-	-	-	-	-
1_13654770	1	55.33435243	AA	AA	AA	AA	BB	AA	AA	AA	BB	BB	AA	BB	AA	BB	AA	AA	AA	BB	-	AA	BB	BB	AA	AA	BB	BB	BB	BB	AA	AA	BB	BB	AA	AA	BB	AA	BB	BB	BB	BB	BB	BB	BB	AA	AA	BB	AA
1_13657972	1	55.33435248	AA	AA	AA	AA	BB	AA	AA	AA	BB	BB	AA	BB	AA	BB	AA	AA	AA	BB	-	AA	BB	BB	AA	AA	BB	BB	BB	BB	AA	AA	BB	BB	AA	AA	BB	AA	BB	BB	BB	BB	BB	BB	BB	AA	AA	BB	AA
1_13671733	1	55.33435253	AA	AA	AA	AA	BB	AA	AA	AA	BB	BB	AA	BB	AA	BB	AA	AA	AA	BB	-	AA	BB	BB	AA	AA	BB	BB	BB	BB	AA	AA	BB	BB	AA	AA	BB	AA	BB	BB	BB	BB	BB	BB	BB	AA	AA	BB	AA
1_13676280	1	55.33435258	AA	AA	AA	AA	BB	AA	AA	AA	BB	BB	AA	BB	AA	BB	AA	AA	AA	BB	-	AA	BB	BB	AA	AA	BB	BB	BB	BB	AA	AA	BB	BB	AA	AA	BB	AA	BB	BB	BB	BB	BB	BB	BB	AA	AA	BB	AA
1_13676723	1	55.33435263	AA	AA	AA	AA	BB	AA	AA	AA	BB	BB	AA	BB	AA	BB	AA	AA	AA	BB	-	AA	BB	BB	AA	AA	BB	BB	BB	BB	AA	AA	BB	BB	AA	AA	BB	AA	BB	BB	BB	BB	BB	BB	BB	AA	AA	BB	AA
1_13678378	1	55.33435268	-	-	-	-	-	-	-	-	-	-	-	-	-	-	-	-	-	-	-	-	-	-	-	-	-	-	-	-	-	-	-	-	-	-	-	-	-	-	-	-	-	-	-	-	-	-	-
1_13681332	1	55.33435273	AA	AA	AA	AA	BB	AA	AA	AA	BB	BB	AA	BB	AA	BB	AA	AA	AA	BB	-	AA	BB	BB	AA	AA	BB	BB	BB	BB	AA	AA	BB	BB	AA	AA	BB	AA	BB	BB	BB	BB	BB	BB	BB	AA	AA	BB	AA
1_13681396	1	55.33435278	AA	AA	AA	AA	BB	AA	AA	AA	BB	BB	AA	BB	AA	BB	AA	AA	AA	BB	-	AA	BB	BB	AA	AA	BB	BB	BB	BB	AA	AA	BB	BB	AA	AA	BB	AA	BB	BB	BB	BB	BB	BB	BB	AA	AA	BB	AA
1_13682873	1	55.33435283	AA	AA	AA	AA	BB	AA	AA	AA	BB	BB	AA	BB	AA	BB	AA	AA	AA	BB	-	AA	BB	BB	AA	AA	BB	BB	BB	BB	AA	AA	BB	BB	AA	AA	BB	AA	BB	BB	BB	BB	BB	BB	BB	AA	AA	BB	AA
1_13689023	1	55.33435288	-	-	-	-	-	-	-	-	-	-	-	-	-	-	-	-	-	-	-	-	-	-	-	-	-	-	-	-	-	-	-	-	-	-	-	-	-	-	-	-	-	-	-	-	-	-	-
1_13692084	1	55.33435293	-	-	-	-	-	-	-	-	-	-	-	-	-	-	-	-	-	-	-	-	-	-	-	-	-	-	-	-	-	-	-	-	-	-	-	-	-	-	-	-	-	-	-	-	-	-	-
1_13692329	1	55.33435298	AA	AA	AA	AA	BB	AA	AA	AA	BB	BB	AA	BB	AA	BB	AA	AA	AA	BB	-	AA	BB	BB	AA	AA	BB	BB	BB	BB	AA	AA	BB	BB	AA	AA	BB	AA	BB	BB	BB	BB	BB	BB	BB	AA	AA	BB	AA
1_13699485	1	55.33435303	AA	AA	AA	AA	BB	AA	AA	AA	BB	BB	AA	BB	AA	BB	AA	AA	AA	BB	-	AA	BB	BB	AA	AA	BB	BB	BB	BB	AA	AA	BB	BB	AA	AA	BB	AA	BB	BB	BB	BB	BB	BB	BB	AA	AA	BB	AA
1_13720828	1	55.56924418	AA	AA	AA	AA	BB	AA	AA	AA	BB	BB	AA	BB	AA	BB	AA	AA	AA	BB	-	AA	BB	BB	AA	AA	BB	BB	BB	BB	AA	AA	BB	BB	AA	AA	BB	AA	BB	BB	BB	BB	BB	BB	BB	AA	AA	BB	AA
1_13751830	1	55.56924423	AA	AA	AA	AA	BB	AA	AA	AA	BB	BB	AA	BB	AA	BB	AA	AA	AA	BB	-	AA	BB	BB	AA	AA	BB	BB	BB	BB	AA	AA	BB	BB	AA	AA	BB	AA	BB	BB	BB	BB	BB	BB	BB	AA	AA	BB	AA
1_13767749	1	55.56924428	AA	AA	AA	AA	BB	AA	AA	AA	BB	BB	AA	BB	AA	BB	AA	AA	AA	BB	-	AA	BB	BB	AA	AA	BB	BB	BB	BB	AA	AA	BB	BB	AA	AA	BB	AA	BB	BB	BB	BB	BB	BB	BB	AA	AA	BB	AA
1_13786625	1	55.56924433	AA	AA	AA	AA	BB	AA	AA	AA	BB	BB	AA	BB	AA	BB	AA	AA	AA	BB	-	AA	BB	BB	AA	AA	BB	BB	BB	BB	AA	AA	BB	BB	AA	AA	BB	AA	BB	BB	BB	BB	BB	BB	BB	AA	AA	BB	AA
1_13844113	1	55.56924438	AA	AA	AA	AA	BB	AA	AA	AA	BB	BB	AA	BB	AA	BB	AA	AA	AA	BB	-	AA	BB	BB	AA	AA	BB	BB	BB	BB	AA	AA	BB	BB	AA	AA	BB	AA	BB	BB	BB	BB	BB	BB	BB	AA	AA	BB	AA
1_13857839	1	55.56924443	AA	AA	AA	AA	BB	AA	AA	AA	BB	BB	AA	BB	AA	BB	AA	AA	AA	BB	-	AA	BB	BB	AA	AA	BB	BB	BB	BB	AA	AA	BB	BB	AA	AA	BB	AA	BB	BB	BB	BB	BB	BB	BB	AA	AA	BB	AA
1_13857994	1	55.56924448	AA	AA	AA	AA	BB	AA	AA	AA	BB	BB	AA	BB	AA	BB	AA	AA	AA	BB	-	AA	BB	BB	AA	AA	BB	BB	BB	BB	AA	AA	BB	BB	AA	AA	BB	AA	BB	BB	BB	BB	BB	BB	BB	AA	AA	BB	AA
1_13871315	1	55.58493393	AA	AA	AA	AA	BB	AA	AA	AA	BB	BB	AA	BB	AA	BB	AA	AA	AA	BB	-	AA	BB	BB	AA	AA	BB	BB	BB	BB	AA	AA	BB	BB	AA	AA	BB	AA	BB	BB	BB	BB	BB	BB	BB	AA	AA	BB	AA
1_13891640	1	55.58493398	AA	AA	AA	AA	BB	AA	AA	AA	BB	BB	AA	BB	AA	BB	AA	AA	AA	BB	-	AA	BB	BB	AA	AA	BB	BB	BB	BB	AA	AA	BB	BB	AA	AA	BB	AA	BB	BB	BB	BB	BB	BB	BB	AA	AA	BB	AA
1_13891809	1	55.58493403	AA	AA	AA	AA	BB	AA	AA	AA	BB	BB	AA	BB	AA	BB	AA	AA	AA	BB	-	AA	BB	BB	AA	AA	BB	BB	BB	BB	AA	AA	BB	BB	AA	AA	BB	AA	BB	BB	BB	BB	BB	BB	BB	AA	AA	BB	AA
1_13914094	1	55.58493408	AA	AA	AA	AA	BB	AA	AA	AA	BB	BB	AA	BB	AA	BB	AA	AA	AA	BB	-	AA	BB	BB	AA	AA	BB	BB	BB	BB	AA	AA	BB	BB	AA	AA	BB	AA	BB	BB	BB	BB	BB	BB	BB	AA	AA	BB	AA
1_13914533	1	55.58493413	AA	AA	AA	AA	BB	AA	AA	AA	BB	BB	AA	BB	AA	BB	AA	AA	AA	BB	-	AA	BB	BB	AA	AA	BB	BB	BB	BB	AA	AA	BB	BB	AA	AA	BB	AA	BB	BB	BB	BB	BB	BB	BB	AA	AA	BB	AA
1_13914794	1	55.58493418	AA	AA	AA	AA	BB	AA	AA	AA	BB	BB	AA	BB	AA	BB	AA	AA	AA	BB	-	AA	BB	BB	AA	AA	BB	BB	BB	BB	AA	AA	BB	BB	AA	AA	BB	AA	BB	BB	BB	BB	BB	BB	BB	AA	AA	BB	AA
1_13926227	1	55.58493423	AA	AA	AA	AA	BB	AA	AA	AA	BB	BB	AA	BB	AA	BB	AA	AA	AA	BB	-	AA	BB	BB	AA	AA	BB	BB	BB	BB	AA	AA	BB	BB	AA	AA	BB	AA	BB	BB	BB	BB	BB	BB	BB	AA	AA	BB	AA
1_13949085	1	55.58493428	AA	AA	AA	AA	BB	AA	AA	AA	BB	BB	AA	BB	AA	BB	AA	AA	AA	BB	-	AA	BB	BB	AA	AA	BB	BB	BB	BB	AA	AA	BB	BB	AA	AA	BB	AA	BB	BB	BB	BB	BB	BB	BB	AA	AA	BB	AA
1_13953440	1	55.58493433	AA	AA	AA	AA	BB	AA	AA	AA	BB	BB	AA	BB	AA	BB	AA	AA	AA	BB	-	AA	BB	BB	AA	AA	BB	BB	BB	BB	AA	AA	BB	BB	AA	AA	BB	AA	BB	BB	BB	BB	BB	BB	BB	AA	AA	BB	AA
1_13955880	1	55.58493438	AA	AA	AA	AA	BB	AA	AA	AA	BB	BB	AA	BB	AA	BB	AA	AA	AA	BB	-	AA	BB	BB	AA	AA	BB	BB	BB	BB	AA	AA	BB	BB	AA	AA	BB	AA	BB	BB	BB	BB	BB	BB	BB	AA	AA	BB	AA
1_13991124	1	55.58493443	AA	AA	AA	AA	BB	AA	AA	AA	BB	BB	AA	BB	AA	BB	AA	AA	AA	BB	-	AA	BB	BB	AA	AA	BB	BB	BB	BB	AA	AA	BB	BB	AA	AA	BB	AA	BB	BB	BB	BB	BB	BB	BB	AA	AA	BB	AA
1_14017939	1	55.75780511	AA	AA	AA	AA	BB	AA	AA	AA	BB	BB	AA	BB	AA	BB	AA	AA	AA	BB	-	AA	BB	BB	AA	AA	BB	BB	BB	BB	AA	AA	BB	BB	AA	AA	BB	AA	BB	BB	BB	BB	BB	BB	BB	AA	AA	BB	AA
1_14043167	1	55.75780516	-	-	-	-	-	-	-	-	-	-	-	-	-	-	-	-	-	-	-	-	-	-	-	-	-	-	-	-	-	-	-	-	-	-	-	-	-	-	-	-	-	-	-	-	-	-	-
1_14116941	1	55.75780521	AA	AA	AA	AA	BB	AA	AA	AA	BB	BB	AA	BB	AA	BB	AA	AA	AA	BB	-	AA	BB	BB	AA	AA	BB	BB	BB	BB	AA	AA	BB	BB	AA	AA	BB	AA	BB	BB	BB	BB	BB	BB	BB	AA	AA	BB	AA
1_14125503	1	55.75780526	-	-	-	-	-	-	-	-	-	-	-	-	-	-	-	-	-	-	-	-	-	-	-	-	-	-	-	-	-	-	-	-	-	-	-	-	-	-	-	-	-	-	-	-	-	-	-
1_14172483	1	55.75780531	AA	AA	AA	AA	BB	AA	AA	AA	BB	BB	AA	BB	AA	BB	AA	AA	AA	BB	-	AA	BB	BB	AA	AA	BB	BB	BB	BB	AA	AA	BB	BB	AA	AA	BB	AA	BB	BB	BB	BB	BB	BB	BB	AA	AA	BB	AA
1_14193424	1	55.75780536	AA	AA	AA	AA	BB	AA	AA	AA	BB	BB	AA	BB	AA	BB	AA	AA	AA	BB	-	AA	BB	BB	AA	AA	BB	BB	BB	BB	AA	AA	BB	BB	AA	AA	BB	AA	BB	BB	BB	BB	BB	BB	BB	AA	AA	BB	AA
1_14213935	1	55.75780541	AA	AA	AA	AA	BB	AA	AA	AA	BB	BB	AA	BB	AA	BB	AA	AA	AA	BB	-	AA	BB	BB	AA	AA	BB	BB	BB	BB	AA	AA	BB	BB	AA	AA	BB	AA	BB	BB	BB	BB	BB	BB	BB	AA	AA	BB	AA
1_14278362	1	55.75780546	AA	AA	AA	AA	BB	AA	AA	AA	BB	BB	AA	BB	AA	BB	AA	AA	AA	BB	-	AA	BB	BB	AA	AA	BB	BB	BB	BB	AA	AA	BB	BB	AA	AA	BB	AA	BB	BB	BB	BB	BB	BB	BB	AA	AA	BB	AA
1_14302384	1	55.75780551	AA	AA	AA	AA	BB	AA	AA	AA	BB	BB	AA	BB	AA	BB	AA	AA	AA	BB	-	AA	BB	BB	AA	AA	BB	BB	BB	BB	AA	AA	BB	BB	AA	AA	BB	AA	BB	BB	BB	BB	BB	BB	BB	AA	AA	BB	AA
1_14893895	1	56.18983016	AA	AA	AA	AA	BB	AA	AA	AA	BB	BB	AA	BB	AA	BB	AA	AA	AA	BB	-	AA	BB	BB	AA	AA	BB	BB	BB	BB	AA	AA	BB	BB	AA	AA	BB	AA	BB	BB	BB	BB	BB	BB	BB	AA	AA	BB	AA
1_15440954	1	56.18983021	AA	AA	AA	AA	BB	AA	AA	AA	BB	BB	AA	BB	AA	BB	AA	AA	AA	BB	-	AA	BB	BB	AA	AA	BB	BB	BB	BB	AA	AA	BB	BB	AA	AA	BB	AA	BB	BB	BB	BB	BB	BB	BB	AA	AA	BB	AA
1_15500061	1	56.18983026	AA	AA	AA	AA	BB	AA	AA	AA	BB	BB	AA	BB	AA	BB	AA	AA	AA	BB	-	AA	BB	BB	AA	AA	BB	BB	BB	BB	AA	AA	BB	BB	AA	AA	BB	AA	BB	BB	BB	BB	BB	BB	BB	AA	AA	BB	AA
1_15529749	1	56.18983031	AA	AA	AA	AA	BB	AA	AA	AA	BB	BB	AA	BB	AA	BB	AA	AA	AA	BB	-	AA	BB	BB	AA	AA	BB	BB	BB	BB	AA	AA	BB	BB	AA	AA	BB	AA	BB	BB	BB	BB	BB	BB	BB	AA	AA	BB	AA
1_15533672	1	56.18983036	AA	AA	AA	AA	BB	AA	AA	AA	BB	BB	AA	BB	AA	BB	AA	AA	AA	BB	-	AA	BB	BB	AA	AA	BB	BB	BB	BB	AA	AA	BB	BB	AA	AA	BB	AA	BB	BB	BB	BB	BB	BB	BB	AA	AA	BB	AA
1_15570896	1	56.18983041	AA	AA	AA	AA	BB	AA	AA	AA	BB	BB	AA	BB	AA	BB	AA	AA	AA	BB	-	AA	BB	BB	AA	AA	BB	BB	BB	BB	AA	AA	BB	BB	AA	AA	BB	AA	BB	BB	BB	BB	BB	BB	BB	AA	AA	BB	AA
1_15583472	1	56.18983046	AA	AA	AA	AA	BB	AA	AA	AA	BB	BB	AA	BB	AA	BB	AA	AA	AA	BB	-	AA	BB	BB	AA	AA	BB	BB	BB	BB	AA	AA	BB	BB	AA	AA	BB	AA	BB	BB	BB	BB	BB	BB	BB	AA	AA	BB	AA
1_15595092	1	56.18983051	AA	AA	AA	AA	BB	AA	AA	AA	BB	BB	AA	BB	AA	BB	AA	AA	AA	BB	-	AA	BB	BB	AA	AA	BB	BB	BB	BB	AA	AA	BB	BB	AA	AA	BB	AA	BB	BB	BB	BB	BB	BB	BB	AA	AA	BB	AA
1_15601161	1	56.18983056	AA	AA	AA	AA	BB	AA	AA	AA	BB	BB	AA	BB	AA	BB	AA	AA	AA	BB	-	AA	BB	BB	AA	AA	BB	BB	BB	BB	AA	AA	BB	BB	AA	AA	BB	AA	BB	BB	BB	BB	BB	BB	BB	AA	AA	BB	AA
1_15620407	1	56.18983061	AA	AA	AA	AA	BB	AA	AA	AA	BB	BB	AA	BB	AA	BB	AA	AA	AA	BB	-	AA	BB	BB	AA	AA	BB	BB	BB	BB	AA	AA	BB	BB	AA	AA	BB	AA	BB	BB	BB	BB	BB	BB	BB	AA	AA	BB	AA
1_15631710	1	56.37090269	AA	AA	AA	AA	BB	AA	AA	AA	BB	BB	AA	BB	AA	BB	AA	AA	AA	BB	-	AA	BB	BB	AA	AA	BB	BB	BB	BB	AA	AA	BB	BB	AA	AA	BB	AA	BB	BB	BB	BB	BB	BB	BB	AA	AA	BB	AA
1_15633233	1	56.37090274	AA	AA	AA	AA	BB	AA	AA	AA	BB	BB	AA	BB	AA	BB	AA	AA	AA	BB	-	AA	BB	BB	AA	AA	BB	BB	BB	BB	AA	AA	BB	BB	AA	AA	BB	AA	BB	BB	BB	BB	BB	BB	BB	AA	AA	BB	AA
1_15640376	1	56.37090279	AA	AA	AA	AA	BB	AA	AA	AA	BB	BB	AA	BB	AA	BB	AA	AA	AA	BB	-	AA	BB	BB	AA	AA	BB	BB	BB	BB	AA	AA	BB	BB	AA	AA	BB	AA	BB	BB	BB	BB	BB	BB	BB	AA	AA	BB	AA
1_15647854	1	56.37090284	AA	AA	AA	AA	BB	AA	AA	AA	BB	BB	AA	BB	AA	BB	AA	AA	AA	BB	-	AA	BB	BB	AA	AA	BB	BB	BB	BB	AA	AA	BB	BB	AA	AA	BB	AA	BB	BB	BB	BB	BB	BB	BB	AA	AA	BB	AA
1_15658199	1	56.37090289	AA	AA	AA	AA	BB	AA	AA	AA	BB	BB	AA	BB	AA	BB	AA	AA	AA	BB	-	AA	BB	BB	AA	AA	BB	BB	BB	BB	AA	AA	BB	BB	AA	AA	BB	AA	BB	BB	BB	BB	BB	BB	BB	AA	AA	BB	AA
1_15688127	1	56.37090294	-	-	-	-	-	-	-	-	-	-	-	-	-	-	-	-	-	-	-	-	-	-	-	-	-	-	-	-	-	-	-	-	-	-	-	-	-	-	-	-	-	-	-	-	-	-	-
1_15816852	1	56.37090299	-	-	-	-	-	-	-	-	-	-	-	-	-	-	-	-	-	-	-	-	-	-	-	-	-	-	-	-	-	-	-	-	-	-	-	-	-	-	-	-	-	-	-	-	-	-	-
1_15855940	1	56.37090304	AA	AA	AA	AA	BB	AA	AA	AA	BB	BB	AA	BB	AA	BB	AA	AA	AA	BB	-	AA	BB	BB	AA	AA	BB	BB	BB	BB	AA	AA	BB	BB	AA	AA	BB	AA	BB	BB	BB	BB	BB	BB	BB	AA	AA	BB	AA
1_15866185	1	56.37090309	AA	AA	AA	AA	BB	AA	AA	AA	BB	BB	AA	BB	AA	BB	AA	AA	AA	BB	-	AA	BB	BB	AA	AA	BB	BB	BB	BB	AA	AA	BB	BB	AA	AA	BB	AA	BB	BB	BB	BB	BB	BB	BB	AA	AA	BB	AA
1_15910136	1	56.37090314	AA	AA	AA	AA	BB	AA	AA	AA	BB	BB	AA	BB	AA	BB	AA	AA	AA	BB	-	AA	BB	BB	AA	AA	BB	BB	BB	BB	AA	AA	BB	BB	AA	AA	BB	AA	BB	BB	BB	BB	BB	BB	BB	AA	AA	BB	AA
1_15911234	1	56.37090319	AA	AA	AA	AA	BB	AA	AA	AA	BB	BB	AA	BB	AA	BB	AA	AA	AA	BB	-	AA	BB	BB	AA	AA	BB	BB	BB	BB	AA	AA	BB	BB	AA	AA	BB	AA	BB	BB	BB	BB	BB	BB	BB	AA	AA	BB	AA
1_15912427	1	56.37090324	AA	AA	AA	AA	BB	AA	AA	AA	BB	BB	AA	BB	AA	BB	AA	AA	AA	BB	-	AA	BB	BB	AA	AA	BB	BB	BB	BB	AA	AA	BB	BB	AA	AA	BB	AA	BB	BB	BB	BB	BB	BB	BB	AA	AA	BB	AA
1_15922870	1	56.37090329	-	-	-	-	-	-	-	-	-	-	-	-	-	-	-	-	-	-	-	-	-	-	-	-	-	-	-	-	-	-	-	-	-	-	-	-	-	-	-	-	-	-	-	-	-	-	-
1_15931398	1	56.37090334	AA	AA	AA	AA	BB	AA	AA	AA	BB	BB	AA	BB	AA	BB	AA	AA	AA	BB	-	AA	BB	BB	AA	AA	BB	BB	BB	BB	AA	AA	BB	BB	AA	AA	BB	AA	BB	BB	BB	BB	BB	BB	BB	AA	AA	BB	AA
1_15935585	1	56.37090339	AA	AA	AA	AA	BB	AA	AA	AA	BB	BB	AA	BB	AA	BB	AA	AA	AA	BB	-	AA	BB	BB	AA	AA	BB	BB	BB	BB	AA	AA	BB	BB	AA	AA	BB	AA	BB	BB	BB	BB	BB	BB	BB	AA	AA	BB	AA
1_15953578	1	56.37090344	AA	AA	AA	AA	BB	AA	AA	AA	BB	BB	AA	BB	AA	BB	AA	AA	AA	BB	-	AA	BB	BB	AA	AA	BB	BB	BB	BB	AA	AA	BB	BB	AA	AA	BB	AA	BB	BB	BB	BB	BB	BB	BB	AA	AA	BB	AA
1_15982376	1	56.37090349	AA	AA	AA	AA	BB	AA	AA	AA	BB	BB	AA	BB	AA	BB	AA	AA	AA	BB	-	AA	BB	BB	AA	AA	BB	BB	BB	BB	AA	AA	BB	BB	AA	AA	BB	AA	BB	BB	BB	BB	BB	BB	BB	AA	AA	BB	AA
1_15982677	1	56.37090354	AA	AA	AA	AA	BB	AA	AA	AA	BB	BB	AA	BB	AA	BB	AA	AA	AA	BB	-	AA	BB	BB	AA	AA	BB	BB	BB	BB	AA	AA	BB	BB	AA	AA	BB	AA	BB	BB	BB	BB	BB	BB	BB	AA	AA	BB	AA
1_16007925	1	56.37090359	AA	AA	AA	AA	BB	AA	AA	AA	BB	BB	AA	BB	AA	BB	AA	AA	AA	BB	-	AA	BB	BB	AA	AA	BB	BB	BB	BB	AA	AA	BB	BB	AA	AA	BB	AA	BB	BB	BB	BB	BB	BB	BB	AA	AA	BB	AA
1_16053759	1	56.37090364	AA	AA	AA	AA	BB	AA	AA	AA	BB	BB	AA	BB	AA	BB	AA	AA	AA	BB	-	AA	BB	BB	AA	AA	BB	BB	BB	BB	AA	AA	BB	BB	AA	AA	BB	AA	BB	BB	BB	BB	BB	BB	BB	AA	AA	BB	AA
1_16053972	1	56.37090369	AA	AA	AA	AA	BB	AA	AA	AA	BB	BB	AA	BB	AA	BB	AA	AA	AA	BB	-	AA	BB	BB	AA	AA	BB	BB	BB	BB	AA	AA	BB	BB	AA	AA	BB	AA	BB	BB	BB	BB	BB	BB	BB	AA	AA	BB	AA
1_16055835	1	56.37090374	AA	AA	AA	AA	BB	AA	AA	AA	BB	BB	AA	BB	AA	BB	AA	AA	AA	BB	-	AA	BB	BB	AA	AA	BB	BB	BB	BB	AA	AA	BB	BB	AA	AA	BB	AA	BB	BB	BB	BB	BB	BB	BB	AA	AA	BB	AA
1_16063918	1	56.37090379	AA	AA	AA	AA	BB	AA	AA	AA	BB	BB	AA	BB	AA	BB	AA	AA	AA	BB	-	AA	BB	BB	AA	AA	BB	BB	BB	BB	AA	AA	BB	BB	AA	AA	BB	AA	BB	BB	BB	BB	BB	BB	BB	AA	AA	BB	AA
1_16066185	1	56.37090384	AA	AA	AA	AA	BB	AA	AA	AA	BB	BB	AA	BB	AA	BB	AA	AA	AA	BB	-	AA	BB	BB	AA	AA	BB	BB	BB	BB	AA	AA	BB	BB	AA	AA	BB	AA	BB	BB	BB	BB	BB	BB	BB	AA	AA	BB	AA
1_16074195	1	56.51966815	AA	AA	AA	AA	BB	AA	AA	AA	BB	BB	AA	BB	AA	BB	AA	AA	AA	BB	-	AA	BB	BB	AA	AA	BB	BB	BB	BB	AA	AA	BB	BB	AA	AA	BB	AA	BB	BB	BB	BB	BB	BB	BB	AA	AA	BB	AA
1_16090394	1	56.5196682	-	-	-	-	-	-	-	-	-	-	-	-	-	-	-	-	-	-	-	-	-	-	-	-	-	-	-	-	-	-	-	-	-	-	-	-	-	-	-	-	-	-	-	-	-	-	-
1_16115746	1	56.51966825	AA	AA	AA	AA	BB	AA	-	-	BB	BB	AA	BB	AA	BB	AA	AA	AA	BB	-	AA	BB	BB	AA	AA	BB	BB	BB	BB	AA	AA	BB	BB	AA	AA	BB	AA	BB	BB	BB	BB	BB	BB	BB	AA	AA	BB	AA
1_16132859	1	56.68334816	AA	AA	AA	AA	BB	AA	-	-	BB	BB	AA	BB	AA	BB	AA	AA	AA	BB	-	AA	BB	BB	AA	AA	BB	BB	BB	BB	AA	AA	BB	BB	AA	AA	BB	AA	BB	BB	BB	BB	BB	BB	BB	AA	AA	BB	AA
1_16136913	1	56.68334821	AA	AA	AA	AA	BB	AA	-	-	BB	BB	AA	BB	AA	BB	AA	AA	AA	BB	-	AA	BB	BB	AA	AA	BB	BB	BB	BB	AA	AA	BB	BB	AA	AA	BB	AA	BB	BB	BB	BB	BB	BB	BB	AA	AA	BB	AA
1_16137714	1	56.68334826	AA	AA	AA	AA	BB	AA	-	-	BB	BB	AA	BB	AA	BB	AA	AA	AA	BB	-	AA	BB	BB	AA	AA	BB	BB	BB	BB	AA	AA	BB	BB	AA	AA	BB	AA	BB	BB	BB	BB	BB	BB	BB	AA	AA	BB	AA
1_16154639	1	56.68334831	AA	AA	AA	AA	BB	AA	-	-	BB	BB	AA	BB	AA	BB	AA	AA	AA	BB	-	AA	BB	BB	AA	AA	BB	BB	BB	BB	AA	AA	BB	BB	AA	AA	BB	AA	BB	BB	BB	BB	BB	BB	BB	AA	AA	BB	AA
1_16154681	1	56.68334836	-	-	-	-	-	-	-	-	-	-	-	-	-	-	-	-	-	-	-	-	-	-	-	-	-	-	-	-	-	-	-	-	-	-	-	-	-	-	-	-	-	-	-	-	-	-	-
1_16166138	1	56.68334841	AA	AA	AA	AA	BB	AA	-	-	BB	BB	AA	BB	AA	BB	AA	AA	AA	BB	-	AA	BB	BB	AA	AA	BB	BB	BB	BB	AA	AA	BB	BB	AA	AA	BB	AA	BB	BB	BB	BB	BB	BB	BB	AA	AA	BB	AA
1_16173723	1	56.68334846	AA	AA	AA	AA	BB	AA	-	-	BB	BB	AA	BB	AA	BB	AA	AA	AA	BB	-	AA	BB	BB	AA	AA	BB	BB	BB	BB	AA	AA	BB	BB	AA	AA	BB	AA	BB	BB	BB	BB	BB	BB	BB	AA	AA	BB	AA
1_16178846	1	56.68334851	AA	AA	AA	AA	BB	AA	-	-	BB	BB	AA	BB	AA	BB	AA	AA	AA	BB	-	AA	BB	BB	AA	AA	BB	BB	BB	BB	AA	AA	BB	BB	AA	AA	BB	AA	BB	BB	BB	BB	BB	BB	BB	AA	AA	BB	AA
1_16196008	1	56.68334856	AA	AA	AA	AA	BB	AA	-	-	BB	BB	AA	BB	AA	BB	AA	AA	AA	BB	-	AA	BB	BB	AA	AA	BB	BB	BB	BB	AA	AA	BB	BB	AA	AA	BB	AA	BB	BB	BB	BB	BB	BB	BB	AA	AA	BB	AA
1_16228202	1	57.63642915	AA	AA	AA	AA	BB	AA	-	-	BB	BB	AA	BB	AA	BB	AA	AA	AA	BB	-	AA	BB	BB	AA	AA	BB	BB	BB	BB	AA	AA	BB	BB	AA	AA	BB	AA	BB	BB	BB	BB	BB	BB	BB	AA	AA	BB	AA
1_16229302	1	57.6364292	-	-	-	-	-	-	-	-	-	-	-	-	-	-	-	-	-	-	-	-	-	-	-	-	-	-	-	-	-	-	-	-	-	-	-	-	-	-	-	-	-	-	-	-	-	-	-
1_16231879	1	57.63642925	AA	AA	AA	AA	BB	AA	-	-	BB	BB	AA	BB	AA	BB	AA	AA	AA	BB	-	AA	BB	BB	AA	AA	BB	BB	BB	BB	AA	AA	BB	BB	AA	AA	BB	AA	BB	BB	BB	BB	BB	BB	BB	AA	AA	BB	AA
1_16235502	1	57.6364293	AA	AA	AA	AA	BB	AA	-	-	BB	BB	AA	BB	AA	BB	AA	AA	AA	BB	-	AA	BB	BB	AA	AA	BB	BB	BB	BB	AA	AA	BB	BB	AA	AA	BB	AA	BB	BB	BB	BB	BB	BB	BB	AA	AA	BB	AA
1_16239151	1	57.63642935	-	-	-	-	-	-	-	-	-	-	-	-	-	-	-	-	-	-	-	-	-	-	-	-	-	-	-	-	-	-	-	-	-	-	-	-	-	-	-	-	-	-	-	-	-	-	-
1_16241574	1	57.6364294	-	-	-	-	-	-	-	-	-	-	-	-	-	-	-	-	-	-	-	-	-	-	-	-	-	-	-	-	-	-	-	-	-	-	-	-	-	-	-	-	-	-	-	-	-	-	-
1_16242623	1	57.63642945	-	-	-	-	-	-	-	-	-	-	-	-	-	-	-	-	-	-	-	-	-	-	-	-	-	-	-	-	-	-	-	-	-	-	-	-	-	-	-	-	-	-	-	-	-	-	-
1_16243797	1	57.6364295	AA	AA	AA	AA	BB	AA	BB	BB	BB	BB	AA	BB	AA	BB	AA	AA	AA	BB	AA	AA	BB	BB	AA	AA	BB	BB	BB	BB	AA	AA	BB	BB	AA	AA	BB	AA	BB	BB	BB	BB	BB	BB	BB	AA	AA	BB	AA
1_16243994	1	57.63642955	-	-	-	-	-	-	-	-	-	-	-	-	-	-	-	-	-	-	-	-	-	-	-	-	-	-	-	-	-	-	-	-	-	-	-	-	-	-	-	-	-	-	-	-	-	-	-
1_16245682	1	57.6364296	-	-	-	-	-	-	-	-	-	-	-	-	-	-	-	-	-	-	-	-	-	-	-	-	-	-	-	-	-	-	-	-	-	-	-	-	-	-	-	-	-	-	-	-	-	-	-
1_16246450	1	57.63642965	AA	AA	AA	AA	BB	AA	BB	BB	BB	BB	AA	BB	AA	BB	AA	AA	AA	BB	AA	AA	BB	BB	AA	AA	BB	BB	BB	BB	AA	AA	BB	BB	AA	AA	BB	AA	BB	BB	BB	BB	BB	BB	BB	AA	AA	BB	AA
1_16247677	1	57.6364297	AA	AA	AA	AA	BB	AA	BB	BB	BB	BB	AA	BB	AA	BB	AA	AA	AA	BB	AA	AA	BB	BB	AA	AA	BB	BB	BB	BB	AA	AA	BB	BB	AA	AA	BB	AA	BB	BB	BB	BB	BB	BB	BB	AA	AA	BB	AA
1_16250129	1	57.63642975	-	-	-	-	-	-	-	-	-	-	-	-	-	-	-	-	-	-	-	-	-	-	-	-	-	-	-	-	-	-	-	-	-	-	-	-	-	-	-	-	-	-	-	-	-	-	-
1_16254499	1	57.6364298	-	-	-	-	-	-	-	-	-	-	-	-	-	-	-	-	-	-	-	-	-	-	-	-	-	-	-	-	-	-	-	-	-	-	-	-	-	-	-	-	-	-	-	-	-	-	-
1_16266668	1	57.63642985	AA	AA	AA	AA	BB	AA	BB	BB	BB	BB	AA	BB	AA	BB	AA	AA	AA	BB	AA	AA	BB	BB	AA	AA	BB	BB	BB	BB	AA	AA	BB	BB	AA	AA	BB	AA	BB	BB	BB	BB	BB	BB	BB	AA	AA	BB	AA
1_16269367	1	57.6364299	AA	AA	AA	AA	BB	AA	BB	BB	BB	BB	AA	BB	AA	BB	AA	AA	AA	BB	AA	AA	BB	BB	AA	AA	BB	BB	BB	BB	AA	AA	BB	BB	AA	AA	BB	AA	BB	BB	BB	BB	BB	BB	BB	AA	AA	BB	AA
1_16274143	1	57.63642995	AA	AA	AA	AA	BB	AA	BB	BB	BB	BB	AA	BB	AA	BB	AA	AA	AA	BB	AA	AA	BB	BB	AA	AA	BB	BB	BB	BB	AA	AA	BB	BB	AA	AA	BB	AA	BB	BB	BB	BB	BB	BB	BB	AA	AA	BB	AA
1_16274311	1	57.63643	AA	AA	AA	AA	BB	AA	BB	BB	BB	BB	AA	BB	AA	BB	AA	AA	AA	BB	AA	AA	BB	BB	AA	AA	BB	BB	BB	BB	AA	AA	BB	BB	AA	AA	BB	AA	BB	BB	BB	BB	BB	BB	BB	AA	AA	BB	AA
1_16313340	1	57.63643005	AA	AA	AA	AA	BB	AA	BB	BB	BB	BB	AA	BB	AA	BB	AA	AA	AA	BB	AA	AA	BB	BB	AA	AA	BB	BB	BB	BB	AA	AA	BB	BB	AA	AA	BB	AA	BB	BB	BB	BB	BB	BB	BB	AA	AA	BB	AA
1_16320565	1	57.6364301	AA	AA	AA	AA	BB	AA	BB	BB	BB	BB	AA	BB	AA	BB	AA	AA	AA	BB	AA	AA	BB	BB	AA	AA	BB	BB	BB	BB	AA	AA	BB	BB	AA	AA	BB	AA	BB	BB	BB	BB	BB	BB	BB	AA	AA	BB	AA
1_16325065	1	57.63643015	AA	AA	AA	AA	BB	AA	BB	BB	BB	BB	AA	BB	AA	BB	AA	AA	AA	BB	AA	AA	BB	BB	AA	AA	BB	BB	BB	BB	AA	AA	BB	BB	AA	AA	BB	AA	BB	BB	BB	BB	BB	BB	BB	AA	AA	BB	AA
1_16355867	1	57.6364302	AA	AA	AA	AA	BB	AA	BB	BB	BB	BB	AA	BB	AA	BB	AA	AA	AA	BB	AA	AA	BB	BB	AA	AA	BB	BB	BB	BB	AA	AA	BB	BB	AA	AA	BB	AA	BB	BB	BB	BB	BB	BB	BB	AA	AA	BB	AA
1_16402441	1	57.63643025	AA	AA	AA	AA	BB	AA	BB	BB	BB	BB	AA	BB	AA	BB	AA	AA	AA	BB	AA	AA	-	BB	AA	AA	BB	BB	-	BB	AA	AA	BB	BB	AA	AA	BB	AA	BB	BB	BB	BB	BB	BB	BB	AA	AA	BB	AA
1_16408069	1	57.6364303	-	-	-	-	-	-	-	-	-	-	-	-	-	-	-	-	-	-	-	-	-	-	-	-	-	-	-	-	-	-	-	-	-	-	-	-	-	-	-	-	-	-	-	-	-	-	-
1_16410022	1	57.63643035	AA	AA	AA	AA	BB	AA	BB	BB	BB	BB	AA	BB	AA	BB	AA	AA	AA	BB	AA	AA	-	BB	AA	AA	BB	BB	-	BB	AA	AA	BB	BB	AA	AA	BB	AA	BB	BB	BB	BB	BB	BB	BB	AA	AA	BB	AA
1_16411813	1	57.6364304	AA	AA	AA	AA	BB	AA	BB	BB	BB	BB	AA	BB	AA	BB	AA	AA	AA	BB	AA	AA	-	BB	AA	AA	BB	BB	-	BB	AA	AA	BB	BB	AA	AA	BB	AA	BB	BB	BB	BB	BB	BB	BB	AA	AA	BB	AA
1_16414910	1	57.63643045	AA	AA	AA	AA	BB	AA	BB	BB	BB	BB	AA	BB	AA	BB	AA	AA	AA	BB	AA	AA	-	BB	AA	AA	BB	BB	-	BB	AA	AA	BB	BB	AA	AA	BB	AA	BB	BB	BB	BB	BB	BB	BB	AA	AA	BB	AA
1_16415362	1	57.6364305	AA	AA	AA	AA	BB	AA	BB	BB	BB	BB	AA	BB	AA	BB	AA	AA	AA	BB	AA	AA	-	BB	AA	AA	BB	BB	-	BB	AA	AA	BB	BB	AA	AA	BB	AA	BB	BB	BB	BB	BB	BB	BB	AA	AA	BB	AA
1_16439981	1	57.63643055	-	-	-	-	-	-	-	-	-	-	-	-	-	-	-	-	-	-	-	-	-	-	-	-	-	-	-	-	-	-	-	-	-	-	-	-	-	-	-	-	-	-	-	-	-	-	-
1_16442541	1	57.6364306	-	-	-	-	-	-	-	-	-	-	-	-	-	-	-	-	-	-	-	-	-	-	-	-	-	-	-	-	-	-	-	-	-	-	-	-	-	-	-	-	-	-	-	-	-	-	-
1_16449603	1	57.63643065	AA	AA	AA	AA	BB	AA	BB	BB	BB	BB	AA	BB	AA	BB	AA	AA	AA	BB	AA	AA	-	BB	AA	AA	BB	BB	-	BB	AA	AA	BB	BB	AA	AA	BB	AA	BB	BB	BB	BB	BB	BB	BB	AA	AA	BB	AA
1_16451179	1	57.6364307	-	-	-	-	-	-	-	-	-	-	-	-	-	-	-	-	-	-	-	-	-	-	-	-	-	-	-	-	-	-	-	-	-	-	-	-	-	-	-	-	-	-	-	-	-	-	-
1_16466622	1	57.63643075	-	-	-	-	-	-	-	-	-	-	-	-	-	-	-	-	-	-	-	-	-	-	-	-	-	-	-	-	-	-	-	-	-	-	-	-	-	-	-	-	-	-	-	-	-	-	-
1_16493050	1	57.6364308	AA	AA	AA	AA	BB	AA	BB	BB	BB	BB	AA	BB	AA	BB	AA	AA	AA	BB	AA	AA	-	BB	AA	AA	BB	BB	-	BB	AA	AA	BB	BB	AA	AA	BB	AA	BB	BB	BB	BB	BB	BB	BB	AA	AA	BB	AA
1_16499100	1	58.75435819	AA	AA	AA	AA	BB	AA	BB	BB	BB	BB	AA	BB	AA	BB	AA	AA	AA	BB	AA	AA	-	BB	AA	AA	BB	BB	-	BB	AA	AA	BB	BB	AA	AA	BB	AA	BB	BB	BB	BB	BB	BB	BB	AA	AA	BB	AA
1_16499946	1	58.75435824	AA	AA	AA	AA	BB	AA	BB	BB	BB	BB	AA	BB	AA	BB	AA	AA	AA	BB	AA	AA	-	BB	AA	AA	BB	BB	-	BB	AA	AA	BB	BB	AA	AA	BB	AA	BB	BB	BB	BB	BB	BB	BB	AA	AA	BB	AA
1_16501150	1	58.75435829	AA	AA	AA	AA	BB	AA	BB	BB	BB	BB	AA	BB	AA	BB	AA	AA	AA	BB	AA	AA	-	BB	AA	AA	BB	BB	-	BB	AA	AA	BB	BB	AA	AA	BB	AA	BB	BB	BB	BB	BB	BB	BB	AA	AA	BB	AA
1_16508783	1	58.75435834	AA	AA	AA	AA	BB	AA	BB	BB	BB	BB	AA	BB	AA	BB	AA	AA	AA	BB	AA	AA	-	BB	AA	AA	BB	BB	-	BB	AA	AA	BB	BB	AA	AA	BB	AA	BB	BB	BB	BB	BB	BB	BB	AA	AA	BB	AA
1_16541704	1	58.75435839	AA	AA	AA	AA	BB	AA	BB	BB	BB	BB	AA	BB	AA	BB	AA	AA	AA	BB	AA	AA	-	BB	AA	AA	BB	BB	-	BB	AA	AA	BB	BB	AA	AA	BB	AA	BB	BB	BB	BB	BB	BB	BB	AA	AA	BB	AA
1_16552386	1	58.75435844	-	-	-	-	-	-	-	-	-	-	-	-	-	-	-	-	-	-	-	-	-	-	-	-	-	-	-	-	-	-	-	-	-	-	-	-	-	-	-	-	-	-	-	-	-	-	-
1_16562527	1	58.75435849	AA	AA	AA	AA	BB	AA	BB	BB	BB	BB	AA	BB	AA	BB	AA	AA	AA	BB	AA	AA	-	BB	AA	AA	BB	BB	-	BB	AA	AA	BB	BB	AA	AA	BB	AA	BB	BB	BB	BB	BB	BB	BB	AA	AA	BB	AA
1_16565605	1	58.75435854	AA	AA	AA	AA	BB	AA	BB	BB	BB	BB	AA	BB	AA	BB	AA	AA	AA	BB	AA	AA	-	BB	AA	AA	BB	BB	-	BB	AA	AA	BB	BB	AA	AA	BB	AA	BB	BB	BB	BB	BB	BB	BB	AA	AA	BB	AA
1_16566684	1	58.75435859	AA	AA	AA	AA	BB	AA	BB	BB	BB	BB	AA	BB	AA	BB	AA	AA	AA	BB	AA	AA	-	BB	AA	AA	BB	BB	-	BB	AA	AA	BB	BB	AA	AA	BB	AA	BB	BB	BB	BB	BB	BB	BB	AA	AA	BB	AA
1_16567728	1	58.75435864	AA	AA	AA	AA	BB	AA	BB	BB	BB	BB	AA	BB	AA	BB	AA	AA	AA	BB	AA	AA	-	BB	AA	AA	BB	BB	-	BB	AA	AA	BB	BB	AA	AA	BB	AA	BB	BB	BB	BB	BB	BB	BB	AA	AA	BB	AA
1_16567888	1	58.75435869	AA	AA	AA	AA	BB	AA	BB	BB	BB	BB	AA	BB	AA	BB	AA	AA	AA	BB	AA	AA	-	BB	AA	AA	BB	BB	-	BB	AA	AA	BB	BB	AA	AA	BB	AA	BB	BB	BB	BB	BB	BB	BB	AA	AA	BB	AA
1_16571910	1	58.75435874	-	-	-	-	-	-	-	-	-	-	-	-	-	-	-	-	-	-	-	-	-	-	-	-	-	-	-	-	-	-	-	-	-	-	-	-	-	-	-	-	-	-	-	-	-	-	-
1_16583673	1	58.75435879	AA	AA	AA	AA	BB	AA	BB	BB	BB	BB	AA	BB	AA	BB	AA	AA	AA	BB	AA	AA	AA	BB	AA	AA	BB	BB	AA	BB	AA	AA	BB	BB	AA	AA	BB	AA	BB	BB	BB	BB	BB	BB	BB	AA	AA	BB	AA
1_16586473	1	58.75435884	AA	AA	AA	AA	BB	AA	BB	BB	BB	BB	AA	BB	AA	BB	AA	AA	AA	BB	AA	AA	AA	BB	AA	AA	BB	BB	AA	BB	AA	AA	BB	BB	AA	AA	BB	AA	BB	BB	BB	BB	BB	BB	BB	AA	AA	BB	AA
1_16589474	1	58.75435889	AA	AA	AA	AA	BB	AA	BB	BB	BB	BB	AA	BB	AA	BB	AA	AA	AA	BB	AA	AA	AA	BB	AA	AA	BB	BB	AA	BB	AA	AA	BB	BB	AA	AA	BB	AA	BB	BB	BB	BB	BB	BB	BB	AA	AA	BB	AA
1_16598851	1	58.75435894	AA	AA	AA	AA	BB	AA	BB	BB	BB	BB	AA	BB	AA	BB	AA	AA	AA	BB	AA	AA	AA	BB	AA	AA	BB	BB	AA	BB	AA	AA	BB	BB	AA	AA	BB	AA	BB	BB	BB	BB	BB	BB	BB	AA	AA	BB	AA
1_16606677	1	58.75435899	AA	AA	AA	AA	BB	AA	BB	BB	BB	BB	AA	BB	AA	BB	AA	AA	AA	BB	AA	AA	AA	BB	AA	AA	BB	BB	AA	BB	AA	AA	BB	BB	AA	AA	BB	AA	BB	BB	BB	BB	BB	BB	BB	AA	AA	BB	AA
1_16616493	1	58.75435904	AA	AA	AA	AA	BB	AA	BB	BB	BB	BB	AA	BB	AA	BB	AA	AA	AA	BB	AA	AA	AA	BB	AA	AA	BB	BB	AA	BB	AA	AA	BB	BB	AA	AA	BB	AA	BB	BB	BB	BB	BB	BB	BB	AA	AA	BB	AA
1_16625942	1	58.75435909	AA	AA	AA	AA	BB	AA	BB	BB	BB	BB	AA	BB	AA	BB	AA	AA	AA	BB	AA	AA	AA	BB	AA	AA	BB	BB	AA	BB	AA	AA	BB	BB	AA	AA	BB	AA	BB	BB	BB	BB	BB	BB	BB	AA	AA	BB	AA
1_16632077	1	58.75435914	AA	AA	AA	AA	BB	AA	BB	BB	BB	BB	AA	BB	AA	BB	AA	AA	AA	BB	AA	AA	AA	BB	AA	AA	BB	BB	AA	BB	AA	AA	BB	BB	AA	AA	BB	AA	BB	BB	BB	BB	BB	BB	BB	AA	AA	BB	AA
1_16633066	1	58.75435919	AA	AA	AA	AA	BB	AA	BB	BB	BB	BB	AA	BB	AA	BB	AA	AA	AA	BB	AA	AA	AA	BB	AA	AA	BB	BB	AA	BB	AA	AA	BB	BB	AA	AA	BB	AA	BB	BB	BB	BB	BB	BB	BB	AA	AA	BB	AA
1_16635250	1	58.75435924	AA	AA	AA	AA	BB	AA	BB	BB	BB	BB	AA	BB	AA	BB	AA	AA	AA	BB	AA	AA	AA	BB	AA	AA	BB	BB	AA	BB	AA	AA	BB	BB	AA	AA	BB	AA	BB	BB	BB	BB	BB	BB	BB	AA	AA	BB	AA
1_16670781	1	60.07457762	AA	AA	AA	AA	BB	AA	BB	BB	BB	BB	AA	BB	AA	BB	AA	AA	AA	BB	AA	AA	AA	BB	AA	AA	BB	BB	AA	BB	AA	AA	BB	BB	AA	AA	BB	AA	BB	BB	BB	BB	BB	BB	BB	AA	AA	BB	AA
1_16676112	1	60.07457767	-	-	-	-	-	-	-	-	-	-	-	-	-	-	-	-	-	-	-	-	-	-	-	-	-	-	-	-	-	-	-	-	-	-	-	-	-	-	-	-	-	-	-	-	-	-	-
1_16680413	1	60.07457772	-	-	-	-	-	-	-	-	-	-	-	-	-	-	-	-	-	-	-	-	-	-	-	-	-	-	-	-	-	-	-	-	-	-	-	-	-	-	-	-	-	-	-	-	-	-	-
1_16685805	1	60.07457777	AA	AA	AA	AA	BB	AA	BB	BB	BB	BB	AA	BB	AA	BB	AA	AA	AA	BB	AA	AA	AA	BB	AA	AA	BB	BB	AA	BB	AA	AA	BB	BB	AA	AA	BB	AA	BB	BB	BB	BB	BB	BB	BB	AA	AA	BB	AA
1_16704063	1	60.07457782	-	-	-	-	-	-	-	-	-	-	-	-	-	-	-	-	-	-	-	-	-	-	-	-	-	-	-	-	-	-	-	-	-	-	-	-	-	-	-	-	-	-	-	-	-	-	-
1_16717876	1	60.07457787	AA	AA	AA	AA	BB	AA	BB	BB	BB	BB	AA	BB	AA	BB	AA	AA	AA	BB	AA	AA	AA	BB	AA	AA	BB	BB	AA	BB	AA	AA	BB	BB	AA	AA	BB	AA	BB	BB	BB	BB	BB	BB	BB	AA	AA	BB	AA
1_16725835	1	60.07457792	AA	AA	AA	AA	BB	AA	BB	BB	BB	BB	AA	BB	AA	BB	AA	AA	AA	BB	AA	AA	AA	BB	AA	AA	BB	BB	AA	BB	AA	AA	BB	BB	AA	AA	BB	AA	BB	BB	BB	BB	BB	BB	BB	AA	AA	BB	AA
1_16740979	1	60.07457797	AA	AA	AA	AA	BB	AA	BB	BB	BB	BB	AA	BB	AA	BB	AA	AA	AA	BB	AA	AA	AA	BB	AA	AA	BB	BB	AA	BB	AA	AA	BB	BB	AA	AA	BB	AA	BB	BB	BB	BB	BB	BB	BB	AA	AA	BB	AA
1_16742067	1	60.07457802	AA	AA	AA	AA	BB	AA	BB	BB	BB	BB	AA	BB	AA	BB	AA	AA	AA	BB	AA	AA	AA	BB	AA	AA	BB	BB	AA	BB	AA	AA	BB	BB	AA	AA	BB	AA	BB	BB	BB	BB	BB	BB	BB	AA	AA	BB	AA
1_16742292	1	60.07457807	AA	AA	AA	AA	BB	AA	BB	BB	BB	BB	AA	BB	AA	BB	AA	AA	AA	BB	AA	AA	AA	BB	AA	AA	BB	BB	AA	BB	AA	AA	BB	BB	AA	AA	BB	AA	BB	BB	BB	BB	BB	BB	BB	AA	AA	BB	AA
1_16742504	1	60.07457812	AA	AA	AA	AA	BB	AA	BB	BB	BB	BB	AA	BB	AA	BB	AA	AA	AA	BB	AA	AA	AA	BB	AA	AA	BB	BB	AA	BB	AA	AA	BB	BB	AA	AA	BB	AA	BB	BB	BB	BB	BB	BB	BB	AA	AA	BB	AA
1_16754233	1	60.07457817	AA	AA	AA	AA	BB	AA	BB	BB	BB	BB	AA	BB	AA	BB	AA	AA	AA	BB	AA	AA	AA	BB	AA	AA	BB	BB	AA	BB	AA	AA	BB	BB	AA	AA	BB	AA	BB	BB	BB	BB	BB	BB	BB	AA	AA	BB	AA
1_16755271	1	60.72357527	AA	AA	AA	AA	BB	AA	BB	BB	BB	BB	AA	BB	AA	BB	AA	AA	AA	BB	AA	AA	AA	BB	AA	AA	BB	BB	AA	BB	AA	AA	BB	BB	AA	AA	BB	AA	BB	BB	BB	BB	BB	BB	BB	AA	AA	BB	AA
1_16755408	1	60.72357532	AA	AA	AA	AA	BB	AA	BB	BB	BB	BB	AA	BB	AA	BB	AA	AA	AA	BB	AA	AA	AA	BB	AA	AA	BB	BB	AA	BB	AA	AA	BB	BB	AA	AA	BB	AA	BB	BB	BB	BB	BB	BB	BB	AA	AA	BB	AA
1_16759980	1	60.72357537	AA	AA	AA	AA	BB	AA	BB	BB	BB	BB	AA	BB	AA	BB	AA	AA	AA	BB	AA	AA	AA	BB	AA	AA	BB	BB	AA	BB	AA	AA	BB	BB	AA	AA	BB	AA	BB	BB	BB	BB	BB	BB	BB	AA	AA	BB	AA
1_16767173	1	60.72357542	AA	AA	AA	AA	BB	AA	BB	BB	BB	BB	AA	BB	AA	BB	AA	AA	AA	BB	AA	AA	AA	BB	AA	AA	BB	BB	AA	BB	AA	AA	BB	BB	AA	AA	BB	AA	BB	BB	BB	BB	BB	BB	BB	AA	AA	BB	AA
1_16773759	1	60.72357547	AA	AA	AA	AA	BB	AA	BB	BB	BB	BB	AA	BB	AA	BB	AA	AA	AA	BB	AA	AA	AA	BB	AA	AA	BB	BB	AA	BB	AA	AA	BB	BB	AA	AA	BB	AA	BB	BB	BB	BB	BB	BB	BB	AA	AA	BB	AA
1_16799168	1	60.72357552	AA	AA	AA	AA	BB	AA	BB	BB	BB	BB	AA	BB	AA	BB	AA	AA	AA	BB	AA	AA	AA	BB	AA	AA	BB	BB	AA	BB	AA	AA	BB	BB	AA	AA	BB	AA	BB	BB	BB	BB	BB	BB	BB	AA	AA	BB	AA
1_16799502	1	60.72357557	AA	AA	AA	AA	BB	AA	BB	BB	BB	BB	AA	BB	AA	BB	AA	AA	AA	BB	AA	AA	AA	BB	AA	AA	BB	BB	AA	BB	AA	AA	BB	BB	AA	AA	BB	AA	BB	BB	BB	BB	BB	BB	BB	AA	AA	BB	AA
1_16808326	1	60.72357562	AA	AA	AA	AA	BB	AA	BB	BB	BB	BB	AA	BB	AA	BB	AA	AA	AA	BB	AA	AA	AA	BB	AA	AA	BB	BB	AA	BB	AA	AA	BB	BB	AA	AA	BB	AA	BB	BB	BB	BB	BB	BB	BB	AA	AA	BB	AA
1_16817122	1	60.72357567	AA	AA	AA	AA	BB	AA	BB	BB	BB	BB	AA	BB	AA	BB	AA	AA	AA	BB	AA	AA	AA	BB	AA	AA	BB	BB	AA	BB	AA	AA	BB	BB	AA	AA	BB	AA	BB	BB	BB	BB	BB	BB	BB	AA	AA	BB	AA
1_16821443	1	60.72357572	AA	AA	AA	AA	BB	AA	BB	BB	BB	BB	AA	BB	AA	BB	AA	AA	AA	BB	AA	AA	AA	BB	AA	AA	BB	BB	AA	BB	AA	AA	BB	BB	AA	AA	BB	AA	BB	BB	BB	BB	BB	BB	BB	AA	AA	BB	AA
1_16821490	1	60.72357577	-	-	-	-	-	-	-	-	-	-	-	-	-	-	-	-	-	-	-	-	-	-	-	-	-	-	-	-	-	-	-	-	-	-	-	-	-	-	-	-	-	-	-	-	-	-	-
1_16821751	1	60.72357582	AA	AA	AA	AA	BB	AA	BB	BB	BB	BB	AA	BB	AA	BB	AA	AA	AA	BB	AA	AA	AA	BB	AA	AA	BB	BB	AA	BB	AA	AA	BB	BB	AA	AA	BB	AA	BB	BB	BB	BB	BB	BB	BB	AA	AA	BB	AA
1_16823267	1	60.72357587	AA	AA	AA	AA	BB	AA	BB	BB	BB	BB	AA	BB	AA	BB	AA	AA	AA	BB	AA	AA	AA	BB	AA	AA	BB	BB	AA	BB	AA	AA	BB	BB	AA	AA	BB	AA	BB	BB	BB	BB	BB	BB	BB	AA	AA	BB	AA
1_16829990	1	60.72357592	-	-	-	-	-	-	-	-	-	-	-	-	-	-	-	-	-	-	-	-	-	-	-	-	-	-	-	-	-	-	-	-	-	-	-	-	-	-	-	-	-	-	-	-	-	-	-
1_16838006	1	60.72357597	AA	AA	AA	AA	BB	AA	BB	BB	BB	BB	AA	BB	AA	BB	AA	AA	AA	BB	AA	AA	AA	BB	AA	AA	BB	BB	AA	BB	AA	AA	BB	BB	AA	AA	BB	AA	BB	BB	BB	BB	BB	BB	BB	AA	AA	BB	AA
1_16838266	1	60.72357602	AA	AA	AA	AA	BB	AA	BB	BB	BB	BB	AA	BB	AA	BB	AA	AA	AA	BB	AA	AA	AA	BB	AA	AA	BB	BB	AA	BB	AA	AA	BB	BB	AA	AA	BB	AA	BB	BB	BB	BB	BB	BB	BB	AA	AA	BB	AA
1_16847076	1	60.72357607	AA	AA	AA	AA	BB	AA	BB	BB	BB	BB	AA	BB	AA	BB	AA	AA	AA	BB	AA	AA	AA	BB	AA	AA	BB	BB	AA	BB	AA	AA	BB	BB	AA	AA	BB	AA	BB	BB	BB	BB	BB	BB	BB	AA	AA	BB	AA
1_16857287	1	60.72357612	AA	AA	AA	AA	BB	AA	BB	BB	BB	BB	AA	BB	AA	BB	AA	AA	AA	BB	AA	AA	AA	BB	AA	AA	BB	BB	AA	BB	AA	AA	BB	BB	AA	AA	BB	AA	BB	BB	BB	BB	BB	BB	BB	AA	AA	BB	AA
1_16871098	1	60.72357617	AA	AA	AA	AA	BB	AA	BB	BB	BB	BB	AA	BB	AA	BB	AA	AA	AA	BB	AA	AA	AA	BB	AA	AA	BB	BB	AA	BB	AA	AA	BB	BB	AA	AA	BB	AA	BB	BB	BB	BB	BB	BB	BB	AA	AA	BB	AA
1_16886744	1	61.56633719	AA	AA	AA	AA	BB	AA	BB	BB	BB	BB	AA	BB	AA	BB	AA	AA	AA	BB	AA	AA	AA	BB	AA	AA	BB	BB	AA	BB	AA	AA	BB	BB	AA	AA	BB	AA	BB	BB	BB	BB	BB	BB	BB	AA	AA	BB	AA
1_16895495	1	61.56633724	AA	AA	AA	AA	BB	AA	BB	BB	BB	BB	AA	BB	AA	BB	AA	AA	AA	BB	AA	AA	AA	BB	AA	AA	BB	BB	AA	BB	AA	AA	BB	BB	AA	AA	BB	AA	BB	BB	BB	BB	BB	BB	BB	AA	AA	BB	AA
1_16900334	1	61.56633729	-	-	-	-	-	-	-	-	-	-	-	-	-	-	-	-	-	-	-	-	-	-	-	-	-	-	-	-	-	-	-	-	-	-	-	-	-	-	-	-	-	-	-	-	-	-	-
1_16902536	1	61.56633734	AA	AA	AA	AA	BB	AA	BB	BB	BB	BB	AA	BB	AA	BB	AA	AA	AA	BB	AA	AA	AA	BB	AA	AA	BB	BB	AA	BB	AA	AA	BB	BB	AA	AA	BB	AA	BB	BB	BB	BB	BB	BB	BB	AA	AA	BB	AA
1_16942420	1	61.56633739	AA	AA	AA	AA	BB	AA	BB	BB	BB	BB	AA	BB	AA	BB	AA	AA	AA	BB	AA	AA	AA	BB	AA	AA	BB	BB	AA	BB	AA	AA	BB	BB	AA	AA	BB	AA	BB	BB	BB	BB	BB	BB	BB	AA	AA	BB	AA
1_16958527	1	61.56633744	AA	AA	AA	AA	BB	AA	BB	BB	BB	BB	AA	BB	AA	BB	AA	AA	AA	BB	AA	AA	AA	BB	AA	AA	BB	BB	AA	BB	AA	AA	BB	BB	AA	AA	BB	AA	BB	BB	BB	BB	BB	BB	BB	AA	AA	BB	AA
1_16963547	1	61.56633749	AA	AA	AA	AA	BB	AA	BB	BB	BB	BB	AA	BB	AA	BB	AA	AA	AA	BB	AA	AA	AA	BB	AA	AA	BB	BB	AA	BB	AA	AA	BB	BB	AA	AA	BB	AA	BB	BB	BB	BB	BB	BB	BB	AA	AA	BB	AA
1_16965228	1	61.56633754	AA	AA	AA	AA	BB	AA	BB	BB	BB	BB	AA	BB	AA	BB	AA	AA	AA	BB	AA	AA	AA	BB	AA	AA	BB	BB	AA	BB	AA	AA	BB	BB	AA	AA	BB	AA	BB	BB	BB	BB	BB	BB	BB	AA	AA	BB	AA
1_16965568	1	61.56633759	AA	AA	AA	AA	BB	AA	BB	BB	BB	BB	AA	BB	AA	BB	AA	AA	AA	BB	AA	AA	AA	BB	AA	AA	BB	BB	AA	BB	AA	AA	BB	BB	AA	AA	BB	AA	BB	BB	BB	BB	BB	BB	BB	AA	AA	BB	AA
1_16968473	1	61.56633764	AA	AA	AA	AA	BB	AA	BB	BB	BB	BB	AA	BB	AA	BB	AA	AA	AA	BB	AA	AA	AA	BB	AA	AA	BB	BB	AA	BB	AA	AA	BB	BB	AA	AA	BB	AA	BB	BB	BB	BB	BB	BB	BB	AA	AA	BB	AA
1_16986010	1	61.56633769	AA	AA	AA	AA	BB	AA	BB	BB	BB	BB	AA	BB	AA	BB	AA	AA	AA	BB	AA	AA	AA	BB	AA	AA	BB	BB	AA	BB	AA	AA	BB	BB	AA	AA	BB	AA	BB	BB	BB	BB	BB	BB	BB	AA	AA	BB	AA
1_16993185	1	61.56633774	AA	AA	AA	AA	BB	AA	BB	BB	BB	BB	AA	BB	AA	BB	AA	AA	AA	BB	AA	AA	AA	BB	AA	AA	BB	BB	AA	BB	AA	AA	BB	BB	AA	AA	BB	AA	BB	BB	BB	BB	BB	BB	BB	AA	AA	BB	AA
1_16995029	1	61.56633779	AA	AA	AA	AA	BB	AA	BB	BB	BB	BB	AA	BB	AA	BB	AA	AA	AA	BB	AA	AA	AA	BB	AA	AA	BB	BB	AA	BB	AA	AA	BB	BB	AA	AA	BB	AA	BB	BB	BB	BB	BB	BB	BB	AA	AA	BB	AA
1_17004765	1	61.56633784	AA	AA	AA	AA	BB	AA	BB	BB	BB	BB	AA	BB	AA	BB	AA	AA	AA	BB	AA	AA	AA	BB	AA	AA	BB	BB	AA	BB	AA	AA	BB	BB	AA	AA	BB	AA	BB	BB	BB	BB	BB	BB	BB	AA	AA	BB	AA
1_17029915	1	61.56633789	AA	AA	AA	AA	BB	AA	BB	BB	BB	BB	AA	BB	AA	BB	AA	AA	AA	BB	AA	AA	AA	BB	AA	AA	BB	BB	AA	BB	AA	AA	BB	BB	AA	AA	BB	AA	BB	BB	BB	BB	BB	BB	BB	AA	AA	BB	AA
1_17033107	1	61.56633794	AA	AA	AA	AA	BB	AA	BB	BB	BB	BB	AA	BB	AA	BB	AA	AA	AA	BB	AA	AA	AA	BB	AA	AA	BB	BB	AA	BB	AA	AA	BB	BB	AA	AA	BB	AA	BB	BB	BB	BB	BB	BB	BB	AA	AA	BB	AA
1_17051128	1	61.56633799	AA	AA	AA	AA	BB	AA	BB	BB	BB	BB	AA	BB	AA	BB	AA	AA	AA	BB	AA	AA	AA	BB	AA	AA	BB	BB	AA	BB	AA	AA	BB	BB	AA	AA	BB	AA	BB	BB	BB	BB	BB	BB	BB	AA	AA	BB	AA
1_17070695	1	61.56633804	AA	AA	AA	AA	BB	AA	BB	BB	BB	BB	AA	BB	AA	BB	AA	AA	AA	BB	AA	AA	AA	BB	AA	AA	BB	BB	AA	BB	AA	AA	BB	BB	AA	AA	BB	AA	BB	BB	BB	BB	BB	BB	BB	AA	AA	BB	AA
1_17082497	1	61.56633809	AA	AA	AA	AA	BB	AA	BB	BB	BB	BB	AA	BB	AA	BB	AA	AA	AA	BB	AA	AA	AA	BB	AA	AA	BB	BB	AA	BB	AA	AA	BB	BB	AA	AA	BB	AA	BB	BB	BB	BB	BB	BB	BB	AA	AA	BB	AA
1_17084486	1	61.56633814	AA	AA	AA	AA	BB	AA	BB	BB	BB	BB	AA	BB	AA	BB	AA	AA	AA	BB	AA	AA	AA	BB	AA	AA	BB	BB	AA	BB	AA	AA	BB	BB	AA	AA	BB	AA	BB	BB	BB	BB	BB	BB	BB	AA	AA	BB	AA
1_17085339	1	61.56633819	AA	AA	AA	AA	BB	AA	BB	BB	BB	BB	AA	BB	AA	BB	AA	AA	AA	BB	AA	AA	AA	BB	AA	AA	BB	BB	AA	BB	AA	AA	BB	BB	AA	AA	BB	AA	BB	BB	BB	BB	BB	BB	BB	AA	AA	BB	AA
1_17085575	1	61.56633824	AA	AA	AA	AA	BB	AA	BB	BB	BB	BB	AA	BB	AA	BB	AA	AA	AA	BB	AA	AA	AA	BB	AA	AA	BB	BB	AA	BB	AA	AA	BB	BB	AA	AA	BB	AA	BB	BB	BB	BB	BB	BB	BB	AA	AA	BB	AA
1_17089475	1	61.56633829	AA	AA	AA	AA	BB	AA	BB	BB	-	BB	AA	BB	AA	BB	AA	AA	AA	BB	AA	AA	AA	BB	AA	AA	BB	BB	AA	BB	AA	AA	BB	BB	AA	AA	BB	AA	BB	BB	-	BB	BB	BB	BB	AA	AA	BB	AA
1_17097111	1	61.56633834	AA	AA	AA	AA	BB	AA	BB	BB	-	BB	AA	BB	AA	BB	AA	AA	AA	BB	AA	AA	AA	BB	AA	AA	BB	BB	AA	BB	AA	AA	BB	BB	AA	AA	BB	AA	BB	BB	-	BB	BB	BB	BB	AA	AA	BB	AA
1_17099936	1	61.56633839	AA	AA	AA	AA	BB	AA	BB	BB	-	BB	AA	BB	AA	BB	AA	AA	AA	BB	AA	AA	AA	BB	AA	AA	BB	BB	AA	BB	AA	AA	BB	BB	AA	AA	BB	AA	BB	BB	-	BB	BB	BB	BB	AA	AA	BB	AA
1_17105038	1	61.56633844	AA	AA	AA	AA	BB	AA	BB	BB	-	BB	AA	BB	AA	BB	AA	AA	AA	BB	AA	AA	AA	BB	AA	AA	BB	BB	AA	BB	AA	AA	BB	BB	AA	AA	BB	AA	BB	BB	-	BB	BB	BB	BB	AA	AA	BB	AA
1_17105140	1	61.56633849	AA	AA	AA	AA	BB	AA	BB	BB	-	BB	AA	BB	AA	BB	AA	AA	AA	BB	AA	AA	AA	BB	AA	AA	BB	BB	AA	BB	AA	AA	BB	BB	AA	AA	BB	AA	BB	BB	-	BB	BB	BB	BB	AA	AA	BB	AA
1_17116551	1	61.56633854	AA	AA	AA	AA	BB	AA	BB	BB	-	BB	AA	BB	AA	BB	AA	AA	AA	BB	AA	AA	AA	BB	AA	AA	BB	BB	AA	BB	AA	AA	BB	BB	AA	AA	BB	AA	BB	BB	-	BB	BB	BB	BB	AA	AA	BB	AA
1_17116904	1	61.56633859	-	-	-	-	-	-	-	-	-	-	-	-	-	-	-	-	-	-	-	-	-	-	-	-	-	-	-	-	-	-	-	-	-	-	-	-	-	-	-	-	-	-	-	-	-	-	-
1_17118038	1	61.56633864	AA	AA	AA	AA	BB	AA	BB	BB	-	BB	AA	BB	AA	BB	AA	AA	AA	BB	AA	AA	AA	BB	AA	AA	BB	BB	AA	BB	AA	AA	BB	BB	AA	AA	BB	AA	BB	BB	-	BB	BB	BB	BB	AA	AA	BB	AA
1_17119383	1	61.56633869	AA	AA	AA	AA	BB	AA	BB	BB	-	BB	AA	BB	AA	BB	AA	AA	AA	BB	AA	AA	AA	BB	AA	AA	BB	BB	AA	BB	AA	AA	BB	BB	AA	AA	BB	AA	BB	BB	-	BB	BB	BB	BB	AA	AA	BB	AA
1_17124411	1	62.48115559	AA	AA	AA	AA	BB	AA	BB	BB	-	BB	AA	BB	AA	BB	AA	AA	AA	BB	AA	AA	AA	BB	AA	AA	BB	BB	AA	BB	AA	AA	BB	BB	AA	AA	BB	AA	BB	BB	-	BB	BB	BB	BB	AA	AA	BB	AA
1_17134778	1	62.48115564	-	-	-	-	-	-	-	-	-	-	-	-	-	-	-	-	-	-	-	-	-	-	-	-	-	-	-	-	-	-	-	-	-	-	-	-	-	-	-	-	-	-	-	-	-	-	-
1_17160117	1	62.48115569	AA	AA	AA	AA	BB	AA	BB	BB	-	BB	AA	BB	AA	BB	AA	AA	AA	BB	AA	AA	AA	BB	AA	AA	BB	BB	AA	BB	AA	AA	BB	BB	AA	AA	BB	AA	BB	BB	-	BB	BB	BB	BB	AA	AA	BB	AA
1_17164173	1	62.48115574	-	-	-	-	-	-	-	-	-	-	-	-	-	-	-	-	-	-	-	-	-	-	-	-	-	-	-	-	-	-	-	-	-	-	-	-	-	-	-	-	-	-	-	-	-	-	-
1_17178115	1	62.48115579	-	-	-	-	-	-	-	-	-	-	-	-	-	-	-	-	-	-	-	-	-	-	-	-	-	-	-	-	-	-	-	-	-	-	-	-	-	-	-	-	-	-	-	-	-	-	-
1_17180097	1	62.48115584	AA	AA	AA	AA	BB	AA	BB	BB	-	BB	AA	BB	AA	BB	AA	AA	AA	BB	AA	AA	AA	BB	AA	AA	BB	BB	AA	BB	AA	AA	BB	BB	AA	AA	BB	AA	BB	BB	-	BB	BB	BB	BB	AA	AA	BB	AA
1_17187485	1	62.48115589	AA	AA	AA	AA	BB	AA	BB	BB	-	BB	AA	BB	AA	BB	AA	AA	AA	BB	AA	AA	AA	BB	AA	AA	BB	BB	AA	BB	AA	AA	BB	BB	AA	AA	BB	AA	BB	BB	-	BB	BB	BB	BB	AA	AA	BB	AA
1_17187743	1	62.48115594	AA	AA	AA	AA	BB	AA	BB	BB	-	BB	AA	BB	AA	BB	AA	AA	AA	BB	AA	AA	AA	BB	AA	AA	BB	BB	AA	BB	AA	AA	BB	BB	AA	AA	BB	AA	BB	BB	-	BB	BB	BB	BB	AA	AA	BB	AA
1_17189375	1	62.48115599	-	-	-	-	-	-	-	-	-	-	-	-	-	-	-	-	-	-	-	-	-	-	-	-	-	-	-	-	-	-	-	-	-	-	-	-	-	-	-	-	-	-	-	-	-	-	-
1_17192383	1	62.48115604	-	-	-	-	-	-	-	-	-	-	-	-	-	-	-	-	-	-	-	-	-	-	-	-	-	-	-	-	-	-	-	-	-	-	-	-	-	-	-	-	-	-	-	-	-	-	-
1_17201851	1	62.48115609	AA	AA	AA	AA	BB	AA	BB	BB	-	BB	AA	BB	AA	BB	AA	AA	AA	BB	AA	AA	AA	BB	AA	AA	BB	BB	AA	BB	AA	AA	BB	BB	AA	AA	BB	AA	BB	BB	-	BB	BB	BB	BB	AA	AA	BB	AA
1_17208236	1	62.48115614	AA	AA	AA	AA	BB	AA	BB	BB	AA	BB	AA	BB	AA	BB	AA	AA	AA	BB	AA	-	AA	BB	AA	AA	BB	BB	AA	BB	AA	AA	BB	BB	AA	AA	BB	AA	BB	BB	AA	BB	BB	BB	BB	AA	AA	BB	AA
1_17209409	1	62.48115619	AA	AA	AA	AA	BB	AA	BB	BB	AA	BB	AA	BB	AA	BB	AA	AA	AA	BB	AA	-	AA	BB	AA	AA	BB	BB	AA	BB	AA	AA	BB	BB	AA	AA	BB	AA	BB	BB	AA	BB	BB	BB	BB	AA	AA	BB	AA
1_17209675	1	62.48115624	AA	AA	AA	AA	BB	AA	BB	BB	AA	BB	AA	BB	AA	BB	AA	AA	AA	BB	AA	-	AA	BB	AA	AA	BB	BB	AA	BB	AA	AA	BB	BB	AA	AA	BB	AA	BB	BB	AA	BB	BB	BB	BB	AA	AA	BB	AA
1_17214036	1	62.48115629	AA	AA	AA	AA	BB	AA	BB	BB	AA	BB	AA	BB	AA	BB	AA	AA	AA	BB	AA	-	AA	BB	AA	AA	BB	BB	AA	BB	AA	AA	BB	BB	AA	AA	BB	AA	BB	BB	AA	BB	BB	BB	BB	AA	AA	BB	AA
1_17216976	1	62.48115634	-	-	-	-	-	-	-	-	-	-	-	-	-	-	-	-	-	-	-	-	-	-	-	-	-	-	-	-	-	-	-	-	-	-	-	-	-	-	-	-	-	-	-	-	-	-	-
1_17229334	1	62.48115639	AA	AA	AA	AA	BB	AA	BB	BB	AA	BB	AA	BB	AA	BB	AA	AA	AA	BB	AA	-	AA	BB	AA	AA	BB	BB	AA	BB	AA	AA	BB	BB	AA	AA	BB	AA	BB	BB	AA	BB	BB	BB	BB	AA	AA	BB	AA
1_17230891	1	62.48115644	AA	AA	AA	AA	BB	AA	BB	BB	AA	BB	AA	BB	AA	BB	AA	AA	AA	BB	AA	-	AA	BB	AA	AA	BB	BB	AA	BB	AA	AA	BB	BB	AA	AA	BB	AA	BB	BB	AA	BB	BB	BB	BB	AA	AA	BB	AA
1_17231451	1	63.01748522	AA	AA	AA	AA	BB	AA	BB	BB	AA	BB	AA	BB	AA	BB	AA	AA	AA	BB	AA	BB	AA	BB	AA	AA	BB	BB	AA	BB	AA	AA	BB	BB	AA	AA	BB	AA	BB	BB	AA	BB	BB	BB	BB	AA	AA	BB	AA
1_17240341	1	63.01748527	-	-	-	-	-	-	-	-	-	-	-	-	-	-	-	-	-	-	-	-	-	-	-	-	-	-	-	-	-	-	-	-	-	-	-	-	-	-	-	-	-	-	-	-	-	-	-
1_17248098	1	63.01748532	AA	AA	AA	AA	BB	AA	BB	BB	AA	BB	AA	BB	AA	BB	AA	AA	AA	BB	AA	BB	AA	BB	AA	AA	BB	BB	AA	BB	AA	AA	BB	BB	AA	AA	BB	AA	BB	BB	AA	BB	BB	BB	BB	AA	AA	BB	AA
1_17251286	1	63.01748537	AA	AA	AA	AA	BB	AA	BB	BB	AA	BB	AA	BB	AA	BB	AA	AA	AA	BB	AA	BB	AA	BB	AA	AA	BB	BB	AA	BB	AA	AA	BB	BB	AA	AA	BB	AA	BB	BB	AA	BB	BB	BB	BB	AA	AA	BB	AA
1_17251552	1	63.01748542	AA	AA	AA	AA	BB	AA	BB	BB	AA	BB	AA	BB	AA	BB	AA	AA	AA	BB	AA	BB	AA	BB	AA	AA	BB	BB	AA	BB	AA	AA	BB	BB	AA	AA	BB	AA	BB	BB	AA	BB	BB	BB	BB	AA	AA	BB	AA
1_17251775	1	63.01748547	AA	AA	AA	AA	BB	AA	BB	BB	AA	BB	AA	BB	AA	BB	AA	AA	AA	BB	AA	BB	AA	BB	AA	AA	BB	BB	AA	BB	AA	AA	BB	BB	AA	AA	BB	AA	BB	BB	AA	BB	BB	BB	BB	AA	AA	BB	AA
1_17255041	1	63.01748552	AA	AA	AA	AA	BB	AA	BB	BB	AA	BB	AA	BB	AA	BB	AA	AA	AA	BB	AA	BB	AA	BB	AA	AA	BB	BB	AA	BB	AA	AA	BB	BB	AA	AA	BB	AA	BB	BB	AA	BB	BB	BB	BB	AA	AA	BB	AA
1_17256855	1	63.77074804	AA	AA	AA	AA	BB	AA	BB	BB	AA	BB	AA	BB	AA	BB	AA	AA	AA	BB	AA	BB	AA	BB	AA	AA	BB	BB	AA	BB	AA	AA	-	BB	AA	AA	BB	AA	BB	-	AA	BB	BB	BB	BB	AA	AA	-	AA
1_17260441	1	63.77074809	AA	AA	AA	AA	BB	AA	BB	BB	AA	BB	AA	BB	AA	BB	AA	AA	AA	BB	AA	BB	AA	BB	AA	AA	BB	BB	AA	BB	AA	AA	-	BB	AA	AA	BB	AA	BB	-	AA	BB	BB	BB	BB	AA	AA	-	AA
1_17263259	1	63.77074814	-	-	-	-	-	-	-	-	-	-	-	-	-	-	-	-	-	-	-	-	-	-	-	-	-	-	-	-	-	-	-	-	-	-	-	-	-	-	-	-	-	-	-	-	-	-	-
1_17276613	1	63.77074819	AA	AA	AA	AA	BB	AA	BB	BB	AA	BB	AA	BB	AA	BB	AA	AA	AA	BB	AA	BB	AA	BB	AA	AA	BB	BB	AA	BB	AA	AA	-	BB	AA	AA	BB	AA	BB	-	AA	BB	BB	BB	BB	AA	AA	-	AA
1_17277752	1	63.77074824	AA	AA	AA	AA	BB	AA	BB	BB	AA	BB	AA	BB	AA	BB	AA	AA	AA	BB	AA	BB	AA	BB	AA	AA	BB	BB	AA	BB	AA	AA	-	BB	AA	AA	BB	AA	BB	-	AA	BB	BB	BB	BB	AA	AA	-	AA
1_17278978	1	63.77074829	AA	AA	AA	AA	BB	AA	BB	BB	AA	BB	AA	BB	AA	BB	AA	AA	AA	BB	AA	BB	AA	BB	AA	AA	BB	BB	AA	BB	AA	AA	-	BB	AA	AA	BB	AA	BB	-	AA	BB	BB	BB	BB	AA	AA	-	AA
1_17293332	1	63.77074834	AA	AA	AA	AA	BB	AA	BB	BB	AA	BB	AA	BB	AA	BB	AA	AA	AA	BB	AA	BB	AA	BB	AA	AA	BB	BB	AA	BB	AA	AA	-	BB	AA	AA	BB	AA	BB	-	AA	BB	BB	BB	BB	AA	AA	-	AA
1_17300209	1	63.77074839	AA	AA	AA	AA	BB	AA	BB	BB	AA	BB	AA	BB	AA	BB	AA	AA	AA	BB	AA	BB	AA	BB	AA	AA	BB	BB	AA	BB	AA	AA	-	BB	AA	AA	BB	AA	BB	-	AA	BB	BB	BB	BB	AA	AA	-	AA
1_17303192	1	63.77074844	AA	AA	AA	AA	BB	AA	BB	BB	AA	BB	AA	BB	AA	BB	AA	AA	AA	BB	AA	BB	AA	BB	AA	AA	BB	BB	AA	BB	AA	AA	-	BB	AA	AA	BB	AA	BB	-	AA	BB	BB	BB	BB	AA	AA	-	AA
1_17307283	1	63.77074849	AA	AA	AA	AA	BB	AA	BB	BB	AA	BB	AA	BB	AA	BB	AA	AA	AA	BB	AA	BB	AA	BB	AA	AA	BB	BB	AA	BB	AA	AA	-	BB	AA	AA	BB	AA	BB	-	AA	BB	BB	BB	BB	AA	AA	-	AA
1_17309447	1	63.77074854	AA	AA	AA	AA	BB	AA	BB	BB	AA	BB	AA	BB	AA	BB	AA	AA	AA	BB	AA	BB	AA	BB	AA	AA	BB	BB	AA	BB	AA	AA	-	BB	AA	AA	BB	AA	BB	-	AA	BB	BB	BB	BB	AA	AA	-	AA
1_17320193	1	63.77074859	AA	AA	AA	AA	BB	AA	BB	BB	AA	BB	AA	BB	AA	BB	AA	AA	AA	BB	AA	BB	AA	BB	AA	AA	BB	BB	AA	BB	AA	AA	-	BB	AA	AA	BB	AA	BB	-	AA	BB	BB	BB	BB	AA	AA	-	AA
1_17324307	1	63.77074864	AA	AA	AA	AA	BB	AA	BB	BB	AA	BB	AA	BB	AA	BB	AA	AA	AA	BB	AA	BB	AA	BB	AA	AA	BB	BB	AA	BB	AA	AA	-	BB	AA	AA	BB	AA	BB	-	AA	BB	BB	BB	BB	AA	AA	-	AA
1_17327950	1	63.77074869	AA	AA	AA	AA	BB	AA	BB	BB	AA	BB	AA	BB	AA	BB	AA	AA	AA	BB	AA	BB	AA	BB	AA	AA	BB	BB	AA	BB	AA	AA	-	BB	AA	AA	BB	AA	BB	-	AA	BB	BB	BB	BB	AA	AA	-	AA
1_17331154	1	63.77074874	AA	AA	AA	AA	BB	AA	BB	BB	AA	BB	AA	BB	AA	BB	AA	AA	AA	BB	AA	BB	AA	BB	AA	AA	BB	BB	AA	BB	AA	AA	-	BB	AA	AA	BB	AA	BB	-	AA	BB	BB	BB	BB	AA	AA	-	AA
1_17334021	1	63.77074879	-	-	-	-	-	-	-	-	-	-	-	-	-	-	-	-	-	-	-	-	-	-	-	-	-	-	-	-	-	-	-	-	-	-	-	-	-	-	-	-	-	-	-	-	-	-	-
1_17352163	1	63.77074884	AA	AA	AA	AA	BB	AA	BB	BB	AA	BB	AA	BB	AA	BB	AA	AA	AA	BB	AA	BB	AA	BB	AA	AA	BB	BB	AA	BB	AA	AA	-	BB	AA	AA	BB	AA	BB	-	AA	BB	BB	BB	BB	AA	AA	-	AA
1_17402875	1	65.2762855	AA	AA	AA	AA	BB	AA	BB	BB	AA	BB	AA	BB	AA	BB	AA	AA	AA	BB	AA	BB	AA	BB	AA	AA	BB	BB	AA	BB	AA	AA	AA	BB	AA	AA	BB	AA	BB	AA	AA	BB	BB	BB	BB	AA	AA	AA	AA
1_17402975	1	65.27628555	AA	AA	AA	AA	BB	AA	BB	BB	AA	BB	AA	BB	AA	BB	AA	AA	AA	BB	AA	BB	AA	BB	AA	AA	BB	BB	AA	BB	AA	AA	AA	BB	AA	AA	BB	AA	BB	AA	AA	BB	BB	BB	BB	AA	AA	AA	AA
1_17406552	1	65.2762856	AA	AA	AA	AA	BB	AA	BB	BB	AA	BB	AA	BB	AA	BB	AA	AA	AA	BB	AA	BB	AA	BB	AA	AA	BB	BB	AA	BB	AA	AA	AA	BB	AA	AA	BB	AA	BB	AA	AA	BB	BB	BB	BB	AA	AA	AA	AA
1_17407548	1	65.27628565	AA	AA	AA	AA	BB	AA	BB	BB	AA	BB	AA	BB	AA	BB	AA	AA	AA	BB	AA	BB	AA	BB	AA	AA	BB	BB	AA	BB	AA	AA	AA	BB	AA	AA	BB	AA	BB	AA	AA	BB	BB	BB	BB	AA	AA	AA	AA
1_17412171	1	65.2762857	AA	AA	AA	AA	BB	AA	BB	BB	AA	BB	AA	BB	AA	BB	AA	AA	AA	BB	AA	BB	AA	BB	AA	AA	BB	BB	AA	BB	AA	AA	AA	BB	AA	AA	BB	AA	BB	AA	AA	BB	BB	BB	BB	AA	AA	AA	AA
1_17413420	1	65.27628575	-	-	-	-	-	-	-	-	-	-	-	-	-	-	-	-	-	-	-	-	-	-	-	-	-	-	-	-	-	-	-	-	-	-	-	-	-	-	-	-	-	-	-	-	-	-	-
1_17429138	1	65.2762858	AA	AA	AA	AA	BB	AA	BB	BB	AA	BB	AA	BB	AA	BB	AA	AA	AA	BB	AA	BB	AA	BB	AA	AA	BB	BB	AA	BB	AA	AA	AA	BB	AA	AA	BB	AA	BB	AA	AA	BB	BB	BB	BB	AA	AA	AA	AA
1_17430044	1	65.27628585	AA	AA	AA	AA	BB	AA	BB	BB	AA	BB	AA	BB	AA	BB	AA	AA	AA	BB	AA	BB	AA	BB	AA	AA	BB	BB	AA	BB	AA	AA	AA	BB	AA	AA	BB	AA	BB	AA	AA	BB	BB	BB	BB	AA	AA	AA	AA
1_17445253	1	65.2762859	AA	AA	AA	AA	BB	AA	BB	BB	AA	BB	AA	BB	AA	BB	AA	AA	AA	BB	AA	BB	AA	BB	AA	AA	BB	BB	AA	BB	AA	AA	AA	BB	AA	AA	BB	AA	BB	AA	AA	BB	BB	BB	BB	AA	AA	AA	AA
1_17450530	1	65.27628595	AA	AA	AA	AA	BB	AA	BB	BB	AA	BB	AA	BB	AA	BB	AA	AA	AA	BB	AA	BB	AA	BB	AA	AA	BB	BB	AA	BB	AA	AA	AA	BB	AA	AA	BB	AA	BB	AA	AA	BB	BB	BB	BB	AA	AA	AA	AA
1_17454663	1	65.276286	AA	AA	AA	AA	BB	AA	BB	BB	AA	BB	AA	BB	AA	BB	AA	AA	AA	BB	AA	BB	AA	BB	AA	AA	BB	BB	AA	BB	AA	AA	AA	BB	AA	AA	BB	AA	BB	AA	AA	BB	BB	BB	BB	AA	AA	AA	AA
1_17464785	1	65.27628605	AA	AA	AA	AA	BB	AA	BB	BB	AA	BB	AA	BB	AA	BB	AA	AA	AA	BB	AA	BB	AA	BB	AA	AA	BB	BB	AA	BB	AA	AA	AA	BB	AA	AA	BB	AA	BB	AA	AA	BB	BB	BB	BB	AA	AA	AA	AA
1_17475266	1	65.2762861	-	-	-	-	-	-	-	-	-	-	-	-	-	-	-	-	-	-	-	-	-	-	-	-	-	-	-	-	-	-	-	-	-	-	-	-	-	-	-	-	-	-	-	-	-	-	-
1_17477914	1	65.27628615	AA	AA	AA	AA	BB	AA	BB	BB	AA	BB	AA	BB	AA	BB	AA	AA	AA	BB	AA	BB	AA	BB	AA	AA	BB	BB	AA	BB	AA	AA	AA	BB	AA	AA	BB	AA	BB	AA	AA	BB	BB	BB	BB	AA	AA	AA	AA
1_17482575	1	65.2762862	-	-	-	-	-	-	-	-	-	-	-	-	-	-	-	-	-	-	-	-	-	-	-	-	-	-	-	-	-	-	-	-	-	-	-	-	-	-	-	-	-	-	-	-	-	-	-
1_17491845	1	65.27628625	AA	AA	AA	AA	BB	AA	BB	BB	AA	BB	AA	BB	AA	BB	AA	AA	AA	BB	AA	BB	AA	BB	AA	AA	BB	BB	AA	BB	AA	AA	AA	BB	AA	AA	BB	AA	BB	AA	AA	BB	BB	BB	BB	AA	AA	AA	AA
1_17491914	1	65.2762863	AA	AA	AA	AA	BB	AA	BB	BB	AA	BB	AA	BB	AA	BB	AA	AA	AA	BB	AA	BB	AA	BB	AA	AA	BB	BB	AA	BB	AA	AA	AA	BB	AA	AA	BB	AA	BB	AA	AA	BB	BB	BB	BB	AA	AA	AA	AA
1_17492270	1	65.27628635	AA	AA	AA	AA	BB	AA	BB	BB	AA	BB	AA	BB	AA	BB	AA	AA	AA	BB	AA	BB	AA	BB	AA	AA	BB	BB	AA	BB	AA	AA	AA	BB	AA	AA	BB	AA	BB	AA	AA	BB	BB	BB	BB	AA	AA	AA	AA
1_17527918	1	65.2762864	AA	AA	AA	AA	BB	AA	BB	BB	AA	BB	AA	BB	AA	BB	AA	AA	AA	BB	AA	BB	AA	BB	AA	AA	BB	BB	AA	BB	AA	AA	AA	BB	AA	AA	BB	AA	BB	AA	AA	BB	BB	BB	BB	AA	AA	AA	AA
1_17530476	1	65.27628645	AA	AA	AA	AA	BB	AA	BB	BB	AA	BB	AA	BB	AA	BB	AA	AA	AA	BB	AA	BB	AA	BB	AA	AA	BB	BB	AA	BB	AA	AA	AA	BB	AA	AA	BB	AA	BB	AA	AA	BB	BB	BB	BB	AA	AA	AA	AA
1_17535233	1	65.2762865	AA	AA	AA	AA	BB	AA	BB	BB	AA	BB	AA	BB	AA	BB	AA	AA	AA	BB	AA	BB	AA	BB	AA	AA	BB	BB	AA	BB	AA	AA	AA	BB	AA	AA	BB	AA	BB	AA	AA	BB	BB	BB	BB	AA	AA	AA	AA
1_17569075	1	65.27628655	-	-	-	-	-	-	-	-	-	-	-	-	-	-	-	-	-	-	-	-	-	-	-	-	-	-	-	-	-	-	-	-	-	-	-	-	-	-	-	-	-	-	-	-	-	-	-
1_17588942	1	65.59785815	AA	AA	AA	AA	BB	AA	BB	BB	AA	BB	AA	BB	AA	BB	AA	AA	AA	BB	AA	BB	AA	BB	AA	AA	BB	BB	AA	BB	AA	AA	AA	BB	AA	AA	BB	AA	BB	AA	AA	BB	BB	BB	BB	AA	AA	AA	AA
1_17592555	1	65.5978582	AA	AA	AA	AA	BB	AA	BB	BB	AA	BB	AA	BB	AA	BB	AA	AA	AA	BB	AA	BB	AA	BB	AA	AA	BB	BB	AA	BB	AA	AA	AA	BB	AA	AA	BB	AA	BB	AA	AA	BB	BB	BB	BB	AA	AA	AA	AA
1_17596205	1	65.94955836	AA	AA	AA	AA	BB	AA	BB	BB	AA	BB	AA	BB	AA	BB	AA	AA	AA	BB	AA	BB	AA	BB	AA	AA	BB	BB	AA	BB	AA	AA	AA	BB	AA	AA	BB	AA	BB	AA	AA	BB	BB	BB	BB	AA	AA	AA	AA
1_17601968	1	65.94955841	AA	AA	AA	AA	BB	AA	BB	BB	AA	BB	AA	BB	AA	BB	AA	AA	AA	BB	AA	BB	AA	BB	AA	AA	BB	BB	AA	BB	AA	AA	AA	BB	AA	AA	BB	AA	BB	AA	AA	BB	BB	BB	BB	AA	AA	AA	AA
1_17614839	1	65.94955846	AA	AA	AA	AA	BB	AA	BB	BB	AA	BB	AA	BB	AA	BB	AA	AA	AA	BB	AA	BB	AA	BB	AA	AA	BB	BB	AA	BB	AA	AA	AA	BB	AA	AA	BB	AA	BB	AA	AA	BB	BB	BB	BB	AA	AA	AA	AA
1_17616567	1	65.94955851	AA	AA	AA	AA	BB	AA	BB	BB	AA	BB	AA	BB	AA	BB	AA	AA	AA	BB	-	BB	AA	BB	AA	AA	BB	BB	AA	BB	AA	AA	AA	BB	AA	AA	BB	AA	BB	AA	AA	BB	BB	BB	BB	AA	AA	AA	AA
1_17621454	1	65.94955856	AA	AA	AA	AA	BB	AA	BB	BB	AA	BB	AA	BB	AA	BB	AA	AA	AA	BB	-	BB	AA	BB	AA	AA	BB	BB	AA	BB	AA	AA	AA	BB	AA	AA	BB	AA	BB	AA	AA	BB	BB	BB	BB	AA	AA	AA	AA
1_17624567	1	66.36573163	-	-	-	-	-	-	-	-	-	-	-	-	-	-	-	-	-	-	-	-	-	-	-	-	-	-	-	-	-	-	-	-	-	-	-	-	-	-	-	-	-	-	-	-	-	-	-
1_17638548	1	66.36573168	AA	AA	AA	AA	BB	AA	BB	BB	AA	BB	AA	BB	AA	BB	AA	AA	AA	BB	-	BB	AA	BB	AA	AA	BB	BB	AA	BB	AA	AA	AA	BB	AA	AA	BB	AA	BB	AA	AA	BB	BB	BB	BB	AA	AA	AA	AA
1_17639192	1	66.36573173	AA	AA	AA	AA	BB	AA	BB	BB	AA	BB	AA	BB	AA	BB	AA	AA	AA	BB	-	BB	AA	BB	AA	AA	BB	BB	AA	BB	AA	AA	AA	BB	AA	AA	BB	AA	BB	AA	AA	BB	BB	BB	BB	AA	AA	AA	AA
1_17647807	1	66.36573178	AA	AA	AA	AA	BB	AA	BB	BB	AA	BB	AA	BB	AA	BB	AA	AA	AA	BB	-	BB	AA	BB	AA	AA	BB	BB	AA	BB	AA	AA	AA	BB	AA	AA	BB	AA	BB	AA	AA	BB	BB	BB	BB	AA	AA	AA	AA
1_17691303	1	66.36573183	AA	AA	AA	AA	BB	AA	BB	BB	AA	BB	AA	BB	AA	BB	AA	AA	AA	BB	-	BB	AA	BB	AA	AA	BB	BB	AA	BB	AA	AA	AA	BB	AA	AA	BB	AA	BB	AA	AA	BB	BB	BB	BB	AA	AA	AA	AA
1_17712545	1	66.36573188	AA	AA	AA	AA	BB	AA	BB	BB	AA	BB	AA	BB	AA	BB	AA	AA	AA	BB	-	BB	AA	BB	AA	AA	BB	BB	AA	BB	AA	AA	AA	BB	AA	AA	BB	AA	BB	AA	AA	BB	BB	BB	BB	AA	AA	AA	AA
1_17712917	1	66.36573193	AA	AA	AA	AA	BB	AA	BB	BB	AA	BB	AA	BB	AA	BB	AA	AA	AA	BB	-	BB	AA	BB	AA	AA	BB	BB	AA	BB	AA	AA	AA	BB	AA	AA	BB	AA	BB	AA	AA	BB	BB	BB	BB	AA	AA	AA	AA
1_17720042	1	66.36573198	-	-	-	-	-	-	-	-	-	-	-	-	-	-	-	-	-	-	-	-	-	-	-	-	-	-	-	-	-	-	-	-	-	-	-	-	-	-	-	-	-	-	-	-	-	-	-
1_17725620	1	66.36573203	AA	AA	AA	AA	BB	AA	BB	BB	AA	BB	AA	BB	AA	BB	AA	AA	AA	BB	-	BB	AA	BB	AA	AA	BB	BB	AA	BB	AA	AA	AA	BB	AA	AA	BB	AA	BB	AA	AA	BB	BB	BB	BB	AA	AA	AA	AA
1_17730296	1	66.36573208	AA	AA	AA	AA	BB	AA	BB	BB	AA	BB	AA	BB	AA	BB	AA	AA	AA	BB	-	BB	AA	BB	AA	AA	BB	BB	AA	BB	AA	AA	AA	BB	AA	AA	BB	AA	BB	AA	AA	BB	BB	BB	BB	AA	AA	AA	AA
1_17740470	1	66.36573213	-	-	-	-	-	-	-	-	-	-	-	-	-	-	-	-	-	-	-	-	-	-	-	-	-	-	-	-	-	-	-	-	-	-	-	-	-	-	-	-	-	-	-	-	-	-	-
1_17761096	1	66.36573218	AA	AA	AA	AA	BB	AA	BB	BB	AA	BB	AA	BB	AA	BB	AA	AA	AA	BB	-	BB	AA	BB	AA	AA	BB	BB	AA	BB	AA	AA	AA	BB	AA	AA	BB	AA	BB	AA	AA	BB	BB	BB	BB	AA	AA	AA	AA
1_17765009	1	66.36573223	AA	AA	AA	AA	BB	AA	BB	BB	AA	BB	AA	BB	AA	BB	AA	AA	AA	BB	-	BB	AA	BB	AA	AA	BB	BB	AA	BB	AA	AA	AA	BB	AA	AA	BB	AA	BB	AA	AA	BB	BB	BB	BB	AA	AA	AA	AA
1_17788386	1	66.36573228	AA	AA	AA	AA	BB	AA	BB	BB	AA	BB	AA	BB	AA	BB	AA	AA	AA	BB	-	BB	AA	BB	AA	AA	BB	BB	AA	BB	AA	AA	AA	BB	AA	AA	BB	AA	BB	AA	AA	BB	BB	BB	BB	AA	AA	AA	AA
1_17797167	1	67.41783018	-	-	-	-	-	-	-	-	-	-	-	-	-	-	-	-	-	-	-	-	-	-	-	-	-	-	-	-	-	-	-	-	-	-	-	-	-	-	-	-	-	-	-	-	-	-	-
1_17802616	1	67.41783023	AA	AA	AA	AA	BB	AA	BB	BB	AA	BB	AA	BB	AA	BB	AA	AA	AA	BB	-	BB	AA	BB	AA	AA	BB	BB	AA	BB	AA	AA	AA	BB	AA	AA	BB	AA	BB	AA	AA	BB	BB	BB	BB	AA	AA	AA	AA
1_17826562	1	67.41783028	AA	AA	AA	AA	BB	AA	BB	BB	AA	BB	AA	BB	AA	BB	AA	AA	AA	BB	-	BB	AA	BB	AA	AA	BB	BB	AA	BB	AA	AA	AA	BB	AA	AA	BB	AA	BB	AA	AA	BB	BB	BB	BB	AA	AA	AA	AA
1_17827803	1	67.41783033	-	-	-	-	-	-	-	-	-	-	-	-	-	-	-	-	-	-	-	-	-	-	-	-	-	-	-	-	-	-	-	-	-	-	-	-	-	-	-	-	-	-	-	-	-	-	-
1_17835941	1	67.41783038	AA	AA	AA	AA	BB	AA	BB	BB	AA	BB	AA	BB	AA	BB	AA	AA	AA	BB	-	BB	AA	BB	AA	AA	BB	BB	AA	BB	AA	AA	AA	BB	AA	AA	BB	AA	BB	AA	AA	BB	BB	BB	BB	AA	AA	AA	AA
1_17841774	1	67.41783043	AA	AA	AA	AA	BB	AA	BB	BB	AA	BB	AA	BB	AA	BB	AA	AA	AA	BB	-	BB	AA	BB	AA	AA	BB	BB	AA	BB	AA	AA	AA	BB	AA	AA	BB	AA	BB	AA	AA	BB	BB	BB	BB	AA	AA	AA	AA
1_17856073	1	67.41783048	AA	AA	AA	AA	BB	AA	BB	BB	AA	BB	AA	BB	AA	BB	AA	AA	AA	BB	-	BB	AA	BB	AA	AA	BB	BB	AA	BB	AA	AA	AA	BB	AA	AA	BB	AA	BB	AA	AA	BB	BB	BB	BB	AA	AA	AA	AA
1_17866641	1	67.41783053	AA	AA	AA	AA	BB	AA	BB	BB	AA	BB	AA	BB	AA	BB	AA	AA	AA	BB	-	BB	AA	BB	AA	AA	BB	BB	AA	BB	AA	AA	AA	BB	AA	AA	BB	AA	BB	AA	AA	BB	BB	BB	BB	AA	AA	AA	AA
1_17867932	1	67.41783058	AA	AA	AA	AA	BB	AA	BB	BB	AA	BB	AA	BB	AA	BB	AA	AA	AA	BB	-	BB	AA	BB	AA	AA	BB	BB	AA	BB	AA	AA	AA	BB	AA	AA	BB	AA	BB	AA	AA	BB	BB	BB	BB	AA	AA	AA	AA
1_17895580	1	67.41783063	AA	AA	AA	AA	BB	AA	BB	BB	AA	BB	AA	BB	AA	BB	AA	AA	AA	BB	-	BB	AA	BB	AA	AA	BB	BB	AA	BB	AA	AA	AA	BB	AA	AA	BB	AA	BB	AA	AA	BB	BB	BB	BB	AA	AA	AA	AA
1_17907976	1	67.41783068	AA	AA	AA	AA	BB	AA	BB	BB	AA	BB	AA	BB	AA	BB	AA	AA	AA	BB	-	BB	AA	BB	AA	AA	BB	BB	AA	BB	AA	AA	AA	BB	AA	AA	BB	AA	BB	AA	AA	BB	BB	BB	BB	AA	AA	AA	AA
1_17925713	1	67.41783073	AA	AA	AA	AA	BB	AA	BB	BB	AA	BB	AA	BB	AA	BB	AA	AA	AA	BB	-	BB	AA	BB	AA	AA	BB	BB	AA	BB	AA	AA	AA	BB	AA	AA	BB	AA	BB	AA	AA	BB	BB	BB	BB	AA	AA	AA	AA
1_17942921	1	67.41783078	AA	AA	AA	AA	BB	AA	BB	BB	AA	BB	AA	BB	AA	BB	AA	AA	AA	BB	-	BB	AA	BB	AA	AA	BB	BB	AA	BB	AA	AA	AA	BB	AA	AA	BB	AA	BB	AA	AA	BB	BB	BB	BB	AA	AA	AA	AA
1_17952303	1	67.41783083	AA	AA	AA	AA	BB	AA	BB	BB	AA	BB	AA	BB	AA	BB	AA	AA	AA	BB	-	BB	AA	BB	AA	AA	BB	BB	AA	BB	AA	AA	AA	BB	AA	AA	BB	AA	BB	AA	AA	BB	BB	BB	BB	AA	AA	AA	AA
1_17955008	1	67.74383058	AA	AA	AA	AA	BB	AA	BB	BB	AA	BB	AA	BB	AA	BB	AA	AA	AA	BB	BB	BB	AA	BB	AA	AA	BB	BB	AA	BB	AA	AA	AA	BB	AA	AA	BB	AA	BB	AA	AA	BB	BB	BB	BB	AA	AA	AA	AA
1_17960928	1	67.74383063	-	-	-	-	-	-	-	-	-	-	-	-	-	-	-	-	-	-	-	-	-	-	-	-	-	-	-	-	-	-	-	-	-	-	-	-	-	-	-	-	-	-	-	-	-	-	-
1_17961659	1	67.74383068	AA	AA	AA	AA	BB	AA	BB	BB	AA	BB	AA	BB	AA	BB	AA	AA	AA	BB	BB	BB	AA	BB	AA	AA	BB	BB	AA	BB	AA	AA	AA	BB	AA	AA	BB	AA	BB	AA	AA	BB	BB	BB	BB	AA	AA	AA	AA
1_17973943	1	67.74383073	AA	AA	AA	AA	BB	AA	BB	BB	AA	BB	AA	BB	AA	BB	AA	AA	AA	BB	BB	BB	AA	BB	AA	AA	BB	BB	AA	BB	AA	AA	AA	BB	AA	AA	BB	AA	BB	AA	AA	BB	BB	BB	BB	AA	AA	AA	AA
1_17974280	1	67.74383078	AA	AA	AA	AA	BB	AA	BB	BB	AA	BB	AA	BB	AA	BB	AA	AA	AA	BB	BB	BB	AA	BB	AA	AA	BB	BB	AA	BB	AA	AA	AA	BB	AA	AA	BB	AA	BB	AA	AA	BB	BB	BB	BB	AA	AA	AA	AA
1_17977114	1	67.74383083	-	-	-	-	-	-	-	-	-	-	-	-	-	-	-	-	-	-	-	-	-	-	-	-	-	-	-	-	-	-	-	-	-	-	-	-	-	-	-	-	-	-	-	-	-	-	-
1_17977784	1	67.74383088	AA	AA	AA	AA	BB	AA	BB	BB	AA	BB	AA	BB	AA	BB	AA	AA	AA	BB	BB	BB	AA	BB	AA	AA	BB	BB	AA	BB	AA	AA	AA	BB	AA	AA	BB	AA	BB	AA	AA	BB	BB	BB	BB	AA	AA	AA	AA
1_17977946	1	67.74383093	AA	AA	AA	AA	BB	AA	BB	BB	AA	BB	AA	BB	AA	BB	AA	AA	AA	BB	BB	BB	AA	BB	AA	AA	BB	BB	AA	BB	AA	AA	AA	BB	AA	AA	BB	AA	BB	AA	AA	BB	BB	BB	BB	AA	AA	AA	AA
1_17996564	1	67.74383098	AA	AA	AA	AA	BB	AA	BB	BB	AA	BB	AA	BB	AA	BB	AA	AA	AA	BB	BB	BB	AA	BB	AA	AA	BB	BB	AA	BB	AA	AA	AA	BB	AA	AA	BB	AA	BB	AA	AA	BB	BB	BB	BB	AA	AA	AA	AA
1_17999528	1	67.74383103	AA	AA	AA	AA	BB	AA	BB	BB	AA	BB	AA	BB	AA	BB	AA	AA	AA	BB	BB	BB	AA	BB	AA	AA	BB	BB	AA	BB	AA	AA	AA	BB	AA	AA	BB	AA	BB	AA	AA	BB	BB	BB	BB	AA	AA	AA	AA
1_18003121	1	67.74383108	AA	AA	AA	AA	BB	AA	BB	BB	AA	BB	AA	BB	AA	BB	AA	AA	AA	BB	BB	BB	AA	BB	AA	AA	BB	BB	AA	BB	AA	AA	AA	BB	AA	AA	BB	AA	BB	AA	AA	BB	BB	BB	BB	AA	AA	AA	AA
1_18020627	1	67.74383113	-	-	-	-	-	-	-	-	-	-	-	-	-	-	-	-	-	-	-	-	-	-	-	-	-	-	-	-	-	-	-	-	-	-	-	-	-	-	-	-	-	-	-	-	-	-	-
1_18030027	1	67.74383118	AA	AA	AA	AA	BB	AA	BB	BB	AA	BB	AA	BB	AA	BB	AA	AA	AA	BB	BB	BB	AA	BB	AA	AA	BB	BB	AA	BB	AA	AA	AA	BB	AA	AA	BB	AA	BB	AA	AA	BB	BB	BB	BB	AA	AA	AA	AA
1_18050008	1	67.74383123	AA	AA	AA	AA	BB	AA	BB	BB	AA	BB	AA	BB	AA	BB	AA	AA	AA	BB	BB	BB	AA	BB	AA	AA	BB	BB	AA	BB	AA	AA	AA	BB	AA	AA	BB	AA	BB	AA	AA	BB	BB	BB	BB	AA	AA	AA	AA
1_18051516	1	67.74383128	AA	AA	AA	AA	BB	AA	BB	BB	AA	BB	AA	BB	AA	BB	AA	AA	AA	BB	BB	BB	AA	BB	AA	AA	BB	BB	AA	BB	AA	AA	AA	BB	AA	AA	BB	AA	BB	AA	AA	BB	BB	BB	BB	AA	AA	AA	AA
1_18053442	1	67.74383133	AA	AA	AA	AA	BB	AA	BB	BB	AA	BB	AA	BB	AA	BB	AA	AA	AA	BB	BB	BB	AA	BB	AA	AA	BB	BB	AA	BB	AA	AA	AA	BB	AA	AA	BB	AA	BB	AA	AA	BB	BB	BB	BB	AA	AA	AA	AA
1_18078505	1	68.2904518	AA	AA	AA	-	BB	AA	BB	BB	AA	BB	AA	BB	AA	BB	AA	AA	AA	BB	BB	BB	AA	BB	AA	AA	BB	BB	AA	BB	AA	AA	AA	BB	AA	AA	BB	AA	BB	AA	-	BB	BB	BB	-	AA	AA	AA	AA
1_18101369	1	68.29045185	AA	AA	AA	-	BB	AA	BB	BB	AA	BB	AA	BB	AA	BB	AA	AA	AA	BB	BB	BB	AA	BB	AA	AA	BB	BB	AA	BB	AA	AA	AA	BB	AA	AA	BB	AA	BB	AA	-	BB	BB	BB	-	AA	AA	AA	AA
1_18135357	1	68.2904519	AA	AA	AA	-	BB	AA	BB	BB	AA	BB	AA	BB	AA	BB	AA	AA	AA	BB	BB	BB	AA	BB	AA	AA	BB	BB	AA	BB	AA	AA	AA	BB	AA	AA	BB	AA	BB	AA	-	BB	BB	BB	-	AA	AA	AA	AA
1_18136210	1	68.29045195	AA	AA	AA	-	BB	AA	BB	BB	AA	BB	AA	BB	AA	BB	AA	AA	AA	BB	BB	BB	AA	BB	AA	AA	BB	BB	AA	BB	AA	AA	AA	BB	AA	AA	BB	AA	BB	AA	-	BB	BB	BB	-	AA	AA	AA	AA
1_18146882	1	68.290452	AA	AA	AA	-	BB	AA	BB	BB	AA	BB	AA	BB	AA	BB	AA	AA	AA	BB	BB	BB	AA	BB	AA	AA	BB	BB	AA	BB	AA	AA	AA	BB	AA	AA	BB	AA	BB	AA	-	BB	BB	BB	-	AA	AA	AA	AA
1_18149642	1	68.29045205	AA	AA	AA	-	BB	AA	BB	BB	AA	BB	AA	BB	AA	BB	AA	AA	AA	BB	BB	BB	AA	BB	AA	AA	BB	BB	AA	BB	AA	AA	AA	BB	AA	AA	BB	AA	BB	AA	-	BB	BB	BB	-	AA	AA	AA	AA
1_18151226	1	68.2904521	AA	AA	AA	-	BB	AA	BB	BB	AA	BB	AA	BB	AA	BB	AA	AA	AA	BB	BB	BB	AA	BB	AA	AA	BB	BB	AA	BB	AA	AA	AA	BB	AA	AA	BB	AA	BB	AA	-	BB	BB	BB	-	AA	AA	AA	AA
1_18166460	1	68.29045215	-	-	-	-	-	-	-	-	-	-	-	-	-	-	-	-	-	-	-	-	-	-	-	-	-	-	-	-	-	-	-	-	-	-	-	-	-	-	-	-	-	-	-	-	-	-	-
1_18212090	1	68.2904522	-	-	-	-	-	-	-	-	-	-	-	-	-	-	-	-	-	-	-	-	-	-	-	-	-	-	-	-	-	-	-	-	-	-	-	-	-	-	-	-	-	-	-	-	-	-	-
1_18214874	1	69.00747588	AA	AA	AA	-	BB	AA	BB	BB	AA	BB	AA	BB	AA	BB	AA	AA	AA	BB	BB	BB	AA	BB	AA	AA	BB	BB	AA	BB	AA	AA	AA	BB	AA	AA	BB	AA	BB	AA	-	BB	BB	BB	-	AA	AA	AA	AA
1_18215786	1	69.00747593	AA	AA	AA	-	BB	AA	BB	BB	AA	BB	AA	BB	AA	BB	AA	AA	AA	BB	BB	BB	AA	BB	AA	AA	BB	BB	AA	BB	AA	AA	AA	BB	AA	AA	BB	AA	BB	AA	-	BB	BB	BB	-	AA	AA	AA	AA
1_18243811	1	69.00747598	AA	AA	AA	-	BB	AA	BB	BB	AA	BB	AA	BB	AA	BB	AA	AA	AA	BB	BB	BB	AA	BB	AA	AA	BB	BB	AA	BB	AA	AA	AA	BB	AA	AA	BB	AA	BB	AA	-	BB	BB	BB	-	AA	AA	AA	AA
1_18251321	1	69.00747603	AA	AA	AA	-	BB	AA	BB	BB	AA	BB	AA	BB	AA	BB	AA	AA	AA	BB	BB	BB	AA	BB	AA	AA	BB	BB	AA	BB	AA	AA	AA	BB	AA	AA	BB	AA	BB	AA	-	BB	BB	BB	-	AA	AA	AA	AA
1_18257746	1	69.00747608	AA	AA	AA	-	BB	AA	BB	BB	AA	BB	AA	BB	AA	BB	AA	AA	AA	BB	BB	BB	AA	BB	AA	AA	BB	BB	AA	BB	AA	AA	AA	BB	AA	AA	BB	AA	BB	AA	-	BB	BB	BB	-	AA	AA	AA	AA
1_18265647	1	69.00747613	AA	AA	AA	BB	BB	AA	BB	BB	AA	BB	AA	BB	AA	BB	AA	AA	AA	BB	BB	BB	AA	BB	AA	AA	BB	BB	AA	BB	AA	AA	AA	BB	AA	AA	BB	AA	BB	AA	BB	BB	BB	BB	-	AA	AA	AA	AA
1_18288175	1	69.00747618	AA	AA	AA	BB	BB	AA	BB	BB	AA	BB	-	BB	AA	BB	AA	AA	AA	BB	BB	BB	AA	BB	AA	AA	BB	BB	AA	BB	AA	AA	AA	BB	AA	AA	BB	AA	BB	AA	BB	BB	BB	BB	-	AA	AA	AA	AA
1_18322863	1	69.00747623	-	-	-	-	-	-	-	-	-	-	-	-	-	-	-	-	-	-	-	-	-	-	-	-	-	-	-	-	-	-	-	-	-	-	-	-	-	-	-	-	-	-	-	-	-	-	-
1_18338245	1	69.00747628	-	-	-	-	-	-	-	-	-	-	-	-	-	-	-	-	-	-	-	-	-	-	-	-	-	-	-	-	-	-	-	-	-	-	-	-	-	-	-	-	-	-	-	-	-	-	-
1_18339672	1	69.00747633	AA	AA	AA	BB	BB	AA	BB	BB	AA	BB	-	BB	AA	BB	AA	AA	AA	BB	BB	BB	AA	BB	AA	AA	BB	BB	AA	BB	AA	AA	AA	BB	AA	AA	BB	AA	BB	AA	BB	BB	BB	BB	-	AA	AA	AA	AA
1_18339714	1	69.00747638	AA	AA	AA	BB	BB	AA	BB	BB	AA	BB	-	BB	AA	BB	AA	AA	AA	BB	BB	BB	AA	BB	AA	AA	BB	BB	AA	BB	AA	AA	AA	BB	AA	AA	BB	AA	BB	AA	BB	BB	BB	BB	-	AA	AA	AA	AA
1_18368096	1	69.00747643	-	-	-	-	-	-	-	-	-	-	-	-	-	-	-	-	-	-	-	-	-	-	-	-	-	-	-	-	-	-	-	-	-	-	-	-	-	-	-	-	-	-	-	-	-	-	-
1_18371620	1	69.00747648	-	-	-	-	-	-	-	-	-	-	-	-	-	-	-	-	-	-	-	-	-	-	-	-	-	-	-	-	-	-	-	-	-	-	-	-	-	-	-	-	-	-	-	-	-	-	-
1_18375289	1	69.00747653	-	-	-	-	-	-	-	-	-	-	-	-	-	-	-	-	-	-	-	-	-	-	-	-	-	-	-	-	-	-	-	-	-	-	-	-	-	-	-	-	-	-	-	-	-	-	-
1_18375519	1	69.00747658	AA	AA	AA	BB	BB	AA	BB	BB	AA	BB	-	BB	AA	BB	AA	AA	AA	BB	BB	BB	AA	BB	AA	AA	BB	BB	AA	BB	AA	AA	AA	BB	AA	AA	BB	AA	BB	AA	BB	BB	BB	BB	-	AA	AA	AA	AA
1_18376897	1	69.00747663	-	-	-	-	-	-	-	-	-	-	-	-	-	-	-	-	-	-	-	-	-	-	-	-	-	-	-	-	-	-	-	-	-	-	-	-	-	-	-	-	-	-	-	-	-	-	-
1_18377035	1	69.00747668	-	-	-	-	-	-	-	-	-	-	-	-	-	-	-	-	-	-	-	-	-	-	-	-	-	-	-	-	-	-	-	-	-	-	-	-	-	-	-	-	-	-	-	-	-	-	-
1_18391942	1	69.00747673	AA	AA	AA	BB	BB	AA	BB	BB	AA	BB	-	BB	AA	BB	AA	AA	AA	BB	BB	BB	AA	BB	AA	AA	BB	BB	AA	BB	AA	AA	AA	BB	AA	AA	BB	AA	BB	AA	BB	BB	BB	BB	-	AA	AA	AA	AA
1_18405160	1	69.00747678	-	-	-	-	-	-	-	-	-	-	-	-	-	-	-	-	-	-	-	-	-	-	-	-	-	-	-	-	-	-	-	-	-	-	-	-	-	-	-	-	-	-	-	-	-	-	-
1_18427301	1	69.00747683	AA	AA	AA	BB	BB	AA	BB	BB	AA	BB	-	BB	AA	BB	AA	AA	AA	BB	BB	BB	AA	BB	AA	AA	BB	BB	AA	BB	AA	AA	AA	BB	AA	AA	BB	AA	BB	AA	BB	BB	BB	BB	-	AA	AA	AA	AA
1_18432261	1	70.22935849	-	-	-	-	-	-	-	-	-	-	-	-	-	-	-	-	-	-	-	-	-	-	-	-	-	-	-	-	-	-	-	-	-	-	-	-	-	-	-	-	-	-	-	-	-	-	-
1_18449071	1	70.22935854	-	-	-	-	-	-	-	-	-	-	-	-	-	-	-	-	-	-	-	-	-	-	-	-	-	-	-	-	-	-	-	-	-	-	-	-	-	-	-	-	-	-	-	-	-	-	-
1_18452053	1	70.22935859	-	-	-	-	-	-	-	-	-	-	-	-	-	-	-	-	-	-	-	-	-	-	-	-	-	-	-	-	-	-	-	-	-	-	-	-	-	-	-	-	-	-	-	-	-	-	-
1_18459349	1	70.22935864	AA	AA	AA	BB	BB	AA	BB	BB	AA	BB	-	BB	AA	BB	AA	AA	AA	BB	BB	BB	AA	BB	AA	AA	BB	BB	AA	BB	AA	AA	AA	BB	AA	AA	BB	AA	BB	AA	BB	BB	BB	BB	AA	AA	AA	AA	AA
1_18463339	1	70.22935869	AA	AA	AA	BB	BB	AA	BB	BB	AA	BB	-	BB	AA	BB	AA	AA	AA	BB	BB	BB	AA	BB	AA	AA	BB	BB	AA	BB	AA	AA	AA	BB	AA	AA	BB	AA	BB	AA	BB	BB	BB	BB	AA	AA	AA	AA	AA
1_18464186	1	70.22935874	AA	AA	AA	BB	BB	AA	BB	BB	AA	BB	-	BB	AA	BB	AA	AA	AA	BB	BB	BB	AA	BB	AA	AA	BB	BB	AA	BB	AA	AA	AA	BB	AA	AA	BB	AA	BB	AA	BB	BB	BB	BB	AA	AA	AA	AA	AA
1_18504638	1	70.22935879	-	-	-	-	-	-	-	-	-	-	-	-	-	-	-	-	-	-	-	-	-	-	-	-	-	-	-	-	-	-	-	-	-	-	-	-	-	-	-	-	-	-	-	-	-	-	-
1_18512584	1	70.22935884	AA	AA	AA	BB	BB	AA	BB	BB	AA	BB	-	BB	AA	BB	AA	AA	AA	BB	BB	BB	AA	BB	AA	AA	BB	BB	AA	BB	AA	AA	AA	BB	AA	AA	BB	AA	BB	AA	BB	BB	BB	BB	AA	AA	AA	AA	AA
1_18520807	1	70.22935889	AA	AA	AA	BB	BB	AA	BB	BB	AA	BB	-	BB	AA	BB	AA	AA	AA	BB	BB	BB	AA	BB	AA	AA	BB	BB	AA	BB	AA	AA	AA	BB	AA	AA	BB	AA	BB	AA	BB	BB	BB	BB	AA	AA	AA	AA	AA
1_18520919	1	70.22935894	AA	AA	AA	BB	BB	AA	BB	BB	AA	BB	-	BB	AA	BB	AA	AA	AA	BB	BB	BB	AA	BB	AA	AA	BB	BB	AA	BB	AA	AA	AA	BB	AA	AA	BB	AA	BB	AA	BB	BB	BB	BB	AA	AA	AA	AA	AA
1_18560468	1	70.22935899	AA	AA	AA	BB	BB	AA	BB	BB	AA	BB	-	BB	AA	BB	AA	AA	AA	BB	BB	BB	AA	BB	AA	AA	BB	BB	AA	BB	AA	AA	AA	BB	AA	AA	BB	AA	BB	AA	BB	BB	BB	BB	AA	AA	AA	AA	AA
1_18562568	1	70.22935904	AA	AA	AA	BB	BB	AA	BB	BB	AA	BB	-	BB	AA	BB	AA	AA	AA	BB	BB	BB	AA	BB	AA	AA	BB	BB	AA	BB	AA	AA	AA	BB	AA	AA	BB	AA	BB	AA	BB	BB	BB	BB	AA	AA	AA	AA	AA
1_18587039	1	70.22935909	AA	AA	AA	BB	BB	AA	BB	BB	AA	BB	-	BB	AA	BB	AA	AA	AA	BB	BB	BB	AA	BB	AA	AA	BB	BB	AA	BB	AA	AA	AA	BB	AA	AA	BB	AA	BB	AA	BB	BB	BB	BB	AA	AA	AA	AA	AA
1_18588919	1	70.22935914	-	-	-	-	-	-	-	-	-	-	-	-	-	-	-	-	-	-	-	-	-	-	-	-	-	-	-	-	-	-	-	-	-	-	-	-	-	-	-	-	-	-	-	-	-	-	-
1_18609694	1	70.22935919	-	-	-	-	-	-	-	-	-	-	-	-	-	-	-	-	-	-	-	-	-	-	-	-	-	-	-	-	-	-	-	-	-	-	-	-	-	-	-	-	-	-	-	-	-	-	-
1_18622693	1	70.22935924	-	-	-	-	-	-	-	-	-	-	-	-	-	-	-	-	-	-	-	-	-	-	-	-	-	-	-	-	-	-	-	-	-	-	-	-	-	-	-	-	-	-	-	-	-	-	-
1_18626555	1	70.22935929	-	-	-	-	-	-	-	-	-	-	-	-	-	-	-	-	-	-	-	-	-	-	-	-	-	-	-	-	-	-	-	-	-	-	-	-	-	-	-	-	-	-	-	-	-	-	-
1_18642373	1	70.22935934	AA	AA	AA	BB	BB	AA	BB	BB	AA	BB	-	BB	AA	BB	AA	AA	AA	BB	BB	BB	AA	BB	AA	AA	BB	BB	AA	BB	AA	AA	AA	BB	AA	AA	BB	AA	BB	AA	BB	BB	BB	BB	-	AA	AA	AA	AA
1_18647104	1	70.22935939	AA	AA	AA	BB	BB	AA	BB	BB	AA	BB	-	BB	AA	BB	AA	AA	AA	BB	BB	BB	AA	BB	AA	AA	BB	BB	AA	BB	AA	AA	AA	BB	AA	AA	BB	AA	BB	AA	BB	BB	BB	BB	-	AA	AA	AA	AA
1_18647676	1	70.22935944	AA	AA	AA	BB	BB	AA	BB	BB	AA	BB	-	BB	AA	BB	AA	AA	AA	BB	BB	BB	AA	BB	AA	AA	BB	BB	AA	BB	AA	AA	AA	BB	AA	AA	BB	AA	BB	AA	BB	BB	BB	BB	-	AA	AA	AA	AA
1_18678528	1	70.22935949	-	-	-	-	-	-	-	-	-	-	-	-	-	-	-	-	-	-	-	-	-	-	-	-	-	-	-	-	-	-	-	-	-	-	-	-	-	-	-	-	-	-	-	-	-	-	-
1_18685910	1	70.22935954	AA	AA	AA	BB	BB	AA	BB	BB	AA	BB	-	BB	AA	BB	AA	AA	AA	BB	BB	BB	AA	BB	AA	AA	BB	BB	AA	BB	AA	AA	AA	BB	AA	AA	BB	AA	BB	AA	BB	BB	BB	BB	-	AA	AA	AA	AA
1_18692826	1	70.22935959	-	-	-	-	-	-	-	-	-	-	-	-	-	-	-	-	-	-	-	-	-	-	-	-	-	-	-	-	-	-	-	-	-	-	-	-	-	-	-	-	-	-	-	-	-	-	-
1_18701388	1	70.22935964	AA	AA	AA	BB	BB	AA	BB	BB	AA	BB	-	BB	AA	BB	AA	AA	AA	BB	BB	BB	AA	BB	AA	AA	BB	BB	AA	BB	AA	AA	AA	BB	AA	AA	BB	AA	BB	AA	BB	BB	BB	BB	-	AA	AA	AA	AA
1_18731910	1	70.46750369	-	-	-	-	-	-	-	-	-	-	-	-	-	-	-	-	-	-	-	-	-	-	-	-	-	-	-	-	-	-	-	-	-	-	-	-	-	-	-	-	-	-	-	-	-	-	-
1_18740501	1	70.46750374	AA	AA	AA	BB	BB	AA	BB	BB	AA	BB	-	BB	AA	BB	AA	AA	AA	BB	BB	BB	AA	BB	AA	AA	BB	BB	AA	BB	AA	AA	AA	BB	AA	AA	BB	AA	BB	AA	BB	BB	BB	BB	-	AA	AA	AA	AA
1_18742327	1	70.46750379	AA	AA	AA	BB	BB	AA	BB	BB	AA	BB	-	BB	AA	BB	AA	AA	AA	BB	BB	BB	AA	BB	AA	AA	BB	BB	AA	BB	AA	AA	AA	BB	AA	AA	BB	AA	BB	AA	BB	BB	BB	BB	-	AA	AA	AA	AA
1_18743816	1	70.46750384	AA	AA	AA	BB	BB	AA	BB	BB	AA	BB	-	BB	AA	BB	AA	AA	AA	BB	BB	BB	AA	BB	AA	AA	BB	BB	AA	BB	AA	AA	AA	BB	AA	AA	BB	AA	BB	AA	BB	BB	BB	BB	-	AA	AA	AA	AA
1_18747175	1	70.46750389	AA	AA	AA	BB	BB	AA	BB	BB	AA	BB	-	BB	AA	BB	AA	AA	AA	BB	BB	BB	AA	BB	AA	AA	BB	BB	AA	BB	AA	AA	AA	BB	AA	AA	BB	AA	BB	AA	BB	BB	BB	BB	-	AA	AA	AA	AA
1_18766549	1	70.46750394	-	-	-	-	-	-	-	-	-	-	-	-	-	-	-	-	-	-	-	-	-	-	-	-	-	-	-	-	-	-	-	-	-	-	-	-	-	-	-	-	-	-	-	-	-	-	-
1_18780759	1	70.46750399	AA	AA	AA	BB	BB	AA	BB	BB	AA	BB	-	BB	AA	BB	AA	AA	AA	BB	BB	BB	AA	BB	AA	AA	BB	BB	AA	BB	AA	AA	AA	BB	AA	AA	BB	AA	BB	AA	BB	BB	BB	BB	-	AA	AA	AA	AA
1_18798327	1	70.46750404	AA	AA	AA	BB	BB	AA	BB	BB	AA	BB	-	BB	AA	BB	AA	AA	AA	BB	BB	BB	AA	BB	AA	AA	BB	BB	AA	BB	AA	AA	AA	BB	AA	AA	BB	AA	BB	AA	BB	BB	BB	BB	-	AA	AA	AA	AA
1_18800598	1	70.46750409	AA	AA	AA	BB	BB	AA	BB	BB	AA	BB	-	BB	AA	BB	AA	AA	AA	BB	BB	BB	AA	BB	AA	AA	BB	BB	AA	BB	AA	AA	AA	BB	AA	AA	BB	AA	BB	AA	BB	BB	BB	BB	-	AA	AA	AA	AA
1_18817547	1	70.46750414	AA	AA	AA	BB	BB	AA	BB	BB	AA	BB	-	BB	AA	BB	AA	AA	AA	BB	BB	BB	AA	BB	AA	AA	BB	BB	AA	BB	AA	AA	AA	BB	AA	AA	BB	AA	BB	AA	BB	BB	BB	BB	-	AA	AA	AA	AA
1_18827149	1	70.46750419	AA	AA	AA	BB	BB	AA	BB	BB	AA	BB	-	BB	AA	BB	AA	AA	AA	BB	BB	BB	AA	BB	AA	AA	BB	BB	AA	BB	AA	AA	AA	BB	AA	AA	BB	AA	BB	AA	BB	BB	BB	BB	-	AA	AA	AA	AA
1_18907314	1	71.34281558	AA	AA	AA	BB	BB	AA	BB	BB	AA	BB	-	BB	AA	BB	AA	AA	AA	BB	BB	BB	AA	BB	AA	AA	BB	BB	AA	BB	AA	AA	AA	BB	AA	AA	BB	AA	BB	AA	BB	BB	BB	BB	BB	AA	AA	AA	AA
1_18921738	1	71.34281563	-	-	-	-	-	-	-	-	-	-	-	-	-	-	-	-	-	-	-	-	-	-	-	-	-	-	-	-	-	-	-	-	-	-	-	-	-	-	-	-	-	-	-	-	-	-	-
1_18928597	1	71.34281568	AA	AA	AA	BB	BB	AA	BB	BB	AA	BB	-	BB	AA	BB	AA	AA	AA	BB	BB	BB	AA	BB	AA	AA	BB	BB	AA	BB	AA	AA	AA	BB	AA	AA	BB	AA	BB	AA	BB	BB	BB	BB	BB	AA	AA	AA	AA
1_18941781	1	71.34281573	AA	AA	AA	BB	BB	AA	BB	BB	AA	BB	-	BB	AA	BB	AA	AA	AA	BB	BB	BB	AA	BB	AA	AA	BB	BB	AA	BB	AA	AA	AA	BB	AA	AA	BB	AA	BB	AA	BB	BB	BB	BB	BB	AA	AA	AA	AA
1_18959829	1	71.34281578	AA	AA	AA	BB	BB	AA	BB	BB	AA	BB	-	BB	AA	BB	AA	AA	AA	BB	BB	BB	AA	BB	AA	AA	BB	BB	AA	BB	AA	AA	AA	BB	AA	AA	BB	AA	BB	AA	BB	BB	BB	BB	BB	AA	AA	AA	AA
1_18964519	1	71.34281583	AA	AA	AA	BB	BB	AA	BB	BB	AA	BB	-	BB	AA	BB	AA	AA	AA	BB	BB	BB	AA	BB	AA	AA	BB	BB	AA	BB	AA	AA	AA	BB	AA	AA	BB	AA	BB	AA	BB	BB	BB	BB	BB	AA	AA	AA	AA
1_18965227	1	71.34281588	AA	AA	AA	BB	BB	AA	BB	BB	AA	BB	-	BB	AA	BB	AA	AA	AA	BB	BB	BB	AA	BB	AA	AA	BB	BB	AA	BB	AA	AA	AA	BB	AA	AA	BB	AA	BB	AA	BB	BB	BB	BB	BB	AA	AA	AA	AA
1_18965852	1	71.34281593	-	-	-	-	-	-	-	-	-	-	-	-	-	-	-	-	-	-	-	-	-	-	-	-	-	-	-	-	-	-	-	-	-	-	-	-	-	-	-	-	-	-	-	-	-	-	-
1_18966874	1	71.34281598	AA	AA	AA	BB	BB	AA	BB	BB	AA	BB	-	BB	AA	BB	AA	AA	AA	BB	BB	BB	AA	BB	AA	AA	BB	BB	AA	BB	AA	AA	AA	BB	AA	AA	BB	AA	BB	AA	BB	BB	BB	BB	BB	AA	AA	AA	AA
1_18968691	1	71.34281603	AA	AA	AA	BB	BB	AA	BB	BB	AA	BB	-	BB	AA	BB	AA	AA	AA	BB	BB	BB	AA	BB	AA	AA	BB	BB	AA	BB	AA	AA	AA	BB	AA	AA	BB	AA	BB	AA	BB	BB	BB	BB	BB	AA	AA	AA	AA
1_18980326	1	71.34281608	AA	AA	AA	BB	BB	AA	BB	BB	AA	BB	-	BB	AA	BB	AA	AA	AA	BB	BB	BB	AA	BB	AA	AA	BB	BB	AA	BB	AA	AA	AA	BB	AA	AA	BB	AA	BB	AA	BB	BB	BB	BB	BB	AA	AA	AA	AA
1_18981664	1	71.34281613	AA	AA	AA	BB	BB	AA	BB	BB	AA	BB	-	BB	AA	BB	AA	AA	AA	BB	BB	BB	AA	BB	AA	AA	BB	BB	AA	BB	AA	AA	AA	BB	AA	AA	BB	AA	BB	AA	BB	BB	BB	BB	BB	AA	AA	AA	AA
1_18986116	1	71.34281618	AA	AA	AA	BB	BB	AA	BB	BB	AA	BB	-	BB	AA	BB	AA	AA	AA	BB	BB	BB	AA	BB	AA	AA	BB	BB	AA	BB	AA	AA	AA	BB	AA	AA	BB	AA	BB	AA	BB	BB	BB	BB	BB	AA	AA	AA	AA
1_19020875	1	71.34281623	AA	AA	AA	BB	BB	AA	BB	BB	AA	BB	-	BB	AA	BB	AA	AA	AA	BB	BB	BB	AA	BB	AA	AA	BB	BB	AA	BB	AA	AA	AA	BB	AA	AA	BB	AA	BB	AA	BB	BB	BB	BB	BB	AA	AA	AA	AA
1_19025803	1	71.34281628	AA	AA	AA	BB	BB	AA	BB	BB	AA	BB	-	BB	AA	BB	AA	AA	AA	BB	BB	BB	AA	BB	AA	AA	BB	BB	AA	BB	AA	AA	AA	BB	AA	AA	BB	AA	BB	AA	BB	BB	BB	BB	BB	AA	AA	AA	AA
1_19030410	1	71.34281633	-	-	-	-	-	-	-	-	-	-	-	-	-	-	-	-	-	-	-	-	-	-	-	-	-	-	-	-	-	-	-	-	-	-	-	-	-	-	-	-	-	-	-	-	-	-	-
1_19031852	1	71.34281638	AA	AA	AA	BB	BB	AA	BB	BB	AA	BB	-	BB	AA	BB	AA	AA	AA	BB	BB	BB	AA	BB	AA	AA	BB	BB	AA	BB	AA	AA	AA	BB	AA	AA	BB	AA	BB	AA	BB	BB	BB	BB	BB	AA	AA	AA	AA
1_19032290	1	71.34281643	AA	AA	AA	BB	BB	AA	BB	BB	AA	BB	-	BB	AA	BB	AA	AA	AA	BB	BB	-	AA	BB	AA	AA	BB	BB	AA	BB	AA	AA	AA	BB	AA	AA	BB	AA	BB	AA	BB	BB	BB	BB	BB	AA	AA	AA	AA
1_19034938	1	71.34281648	AA	AA	AA	BB	BB	AA	BB	BB	AA	BB	-	BB	AA	BB	AA	AA	AA	BB	BB	-	AA	BB	AA	AA	BB	BB	AA	BB	AA	AA	AA	BB	AA	AA	BB	AA	BB	AA	BB	BB	BB	BB	BB	AA	AA	AA	AA
1_19051861	1	71.34281653	AA	AA	AA	BB	BB	AA	BB	BB	AA	BB	-	BB	AA	BB	AA	AA	AA	BB	BB	-	AA	BB	AA	AA	BB	BB	AA	BB	AA	AA	AA	BB	AA	AA	BB	AA	BB	AA	BB	BB	BB	BB	BB	AA	AA	AA	AA
1_19072950	1	71.61723191	AA	AA	AA	BB	BB	AA	BB	BB	AA	BB	-	BB	AA	BB	AA	AA	AA	BB	BB	-	AA	BB	AA	AA	BB	BB	AA	BB	AA	AA	AA	BB	AA	AA	BB	AA	BB	AA	BB	BB	BB	BB	BB	AA	AA	AA	AA
1_19104873	1	71.61723196	-	-	-	-	-	-	-	-	-	-	-	-	-	-	-	-	-	-	-	-	-	-	-	-	-	-	-	-	-	-	-	-	-	-	-	-	-	-	-	-	-	-	-	-	-	-	-
1_19110244	1	71.61723201	AA	AA	AA	BB	BB	AA	BB	BB	AA	BB	-	BB	AA	BB	AA	AA	AA	BB	BB	-	AA	BB	AA	AA	BB	BB	AA	BB	AA	AA	AA	BB	AA	AA	BB	AA	BB	AA	BB	BB	BB	BB	BB	AA	AA	AA	AA
1_19111393	1	71.61723206	AA	AA	AA	BB	BB	AA	BB	BB	AA	BB	-	BB	AA	BB	AA	AA	AA	BB	BB	-	AA	BB	AA	AA	BB	BB	AA	BB	AA	AA	AA	BB	AA	AA	BB	AA	BB	AA	BB	BB	BB	BB	BB	AA	AA	AA	AA
1_19150239	1	71.85414857	AA	AA	AA	BB	BB	AA	BB	BB	AA	BB	-	BB	AA	BB	AA	AA	AA	BB	BB	-	AA	BB	AA	AA	BB	BB	AA	BB	AA	AA	AA	BB	AA	AA	BB	AA	BB	AA	BB	BB	BB	BB	BB	AA	AA	AA	AA
1_19221197	1	71.85414862	AA	AA	AA	BB	BB	AA	BB	BB	AA	BB	-	BB	AA	BB	AA	AA	AA	BB	BB	-	AA	BB	AA	AA	BB	BB	AA	BB	AA	AA	AA	BB	AA	AA	BB	AA	BB	AA	BB	BB	BB	BB	BB	AA	AA	AA	AA
1_19233826	1	71.85414867	AA	AA	AA	BB	BB	AA	BB	BB	AA	BB	-	BB	AA	BB	AA	AA	AA	BB	BB	-	AA	BB	AA	AA	BB	BB	AA	BB	AA	AA	AA	BB	AA	AA	BB	AA	BB	AA	BB	BB	BB	BB	BB	AA	AA	AA	AA
1_19276195	1	71.85414872	AA	AA	AA	BB	BB	AA	BB	BB	AA	-	-	BB	AA	BB	AA	AA	AA	BB	BB	-	AA	BB	AA	AA	BB	BB	AA	BB	AA	AA	AA	BB	AA	AA	BB	AA	BB	AA	BB	BB	BB	BB	BB	AA	AA	AA	AA
1_19284425	1	71.85414877	AA	AA	AA	BB	BB	AA	BB	BB	AA	-	-	BB	AA	BB	AA	AA	AA	BB	BB	-	AA	BB	AA	AA	BB	BB	AA	BB	AA	AA	AA	BB	AA	AA	BB	AA	BB	AA	BB	BB	BB	BB	BB	AA	AA	AA	AA
1_19320505	1	71.85414882	AA	AA	AA	BB	BB	AA	BB	BB	AA	-	-	BB	AA	BB	AA	AA	AA	BB	BB	-	AA	BB	AA	AA	BB	BB	AA	BB	AA	AA	AA	BB	AA	AA	BB	AA	BB	AA	BB	BB	BB	BB	BB	AA	AA	AA	AA
1_19384385	1	71.85414887	AA	AA	AA	BB	BB	AA	BB	BB	AA	-	-	BB	AA	BB	AA	AA	AA	BB	BB	-	AA	BB	AA	AA	BB	BB	AA	BB	AA	AA	AA	BB	AA	AA	BB	AA	BB	AA	BB	BB	BB	BB	BB	AA	AA	AA	AA
1_19430492	1	71.85414892	AA	AA	AA	BB	BB	AA	BB	BB	AA	-	-	BB	AA	BB	AA	AA	AA	BB	BB	-	AA	BB	AA	AA	BB	BB	AA	BB	AA	AA	AA	BB	AA	AA	BB	AA	BB	AA	BB	BB	BB	BB	BB	AA	AA	AA	AA
1_19434966	1	71.85414897	AA	AA	AA	BB	BB	AA	BB	BB	AA	-	-	BB	AA	BB	AA	AA	AA	BB	BB	-	AA	BB	AA	AA	BB	BB	AA	BB	AA	AA	AA	BB	AA	AA	BB	AA	BB	AA	BB	BB	BB	BB	BB	AA	AA	AA	AA
1_19463080	1	71.85414902	AA	AA	AA	BB	BB	AA	BB	BB	AA	-	-	BB	AA	BB	AA	AA	AA	BB	BB	-	AA	BB	AA	AA	BB	BB	AA	BB	AA	AA	AA	BB	AA	AA	BB	AA	BB	AA	BB	BB	BB	BB	BB	AA	AA	AA	AA
1_19542149	1	72.91105626	AA	AA	AA	BB	BB	AA	BB	BB	AA	-	-	BB	AA	BB	AA	AA	AA	BB	BB	-	AA	BB	AA	AA	BB	BB	AA	BB	AA	AA	AA	BB	AA	AA	BB	AA	BB	AA	BB	BB	BB	BB	BB	AA	AA	AA	AA
1_19557583	1	72.91105631	AA	AA	AA	BB	BB	AA	BB	BB	AA	-	-	BB	AA	BB	AA	AA	AA	BB	BB	-	AA	BB	AA	AA	BB	BB	AA	BB	AA	AA	AA	BB	AA	AA	BB	AA	BB	AA	BB	BB	BB	BB	BB	AA	AA	AA	AA
1_19575122	1	72.91105636	AA	AA	AA	BB	BB	AA	BB	BB	AA	-	-	BB	AA	BB	AA	AA	AA	BB	BB	-	AA	BB	AA	AA	BB	BB	AA	BB	AA	AA	AA	BB	AA	AA	BB	AA	BB	AA	BB	BB	BB	BB	BB	AA	AA	AA	AA
1_19586923	1	72.91105641	AA	AA	AA	BB	BB	AA	BB	BB	AA	-	-	BB	AA	BB	AA	AA	AA	BB	BB	-	AA	BB	AA	AA	BB	BB	AA	BB	AA	AA	AA	BB	AA	AA	BB	AA	BB	AA	BB	BB	BB	BB	BB	AA	AA	AA	AA
1_19589589	1	72.91105646	-	-	-	-	-	-	-	-	-	-	-	-	-	-	-	-	-	-	-	-	-	-	-	-	-	-	-	-	-	-	-	-	-	-	-	-	-	-	-	-	-	-	-	-	-	-	-
1_19596503	1	72.91105651	AA	AA	AA	BB	BB	AA	BB	BB	AA	-	-	BB	AA	BB	AA	AA	AA	BB	BB	-	AA	BB	AA	AA	BB	BB	AA	BB	AA	AA	AA	BB	AA	AA	BB	AA	BB	AA	BB	BB	BB	BB	BB	AA	AA	AA	AA
1_19598129	1	72.91105656	AA	AA	AA	BB	BB	AA	BB	BB	AA	-	-	BB	AA	BB	AA	AA	AA	BB	BB	-	AA	BB	AA	AA	BB	BB	AA	BB	AA	AA	AA	BB	AA	AA	BB	AA	BB	AA	BB	BB	BB	BB	BB	AA	AA	AA	AA
1_19603303	1	72.91105661	AA	AA	AA	BB	BB	AA	BB	BB	AA	AA	-	BB	AA	BB	AA	AA	AA	BB	BB	AA	AA	BB	AA	AA	BB	BB	AA	BB	AA	AA	AA	BB	AA	AA	BB	AA	BB	AA	BB	BB	BB	BB	BB	AA	AA	AA	AA
1_19604943	1	72.91105666	-	-	-	-	-	-	-	-	-	-	-	-	-	-	-	-	-	-	-	-	-	-	-	-	-	-	-	-	-	-	-	-	-	-	-	-	-	-	-	-	-	-	-	-	-	-	-
1_19611156	1	73.10837616	-	-	-	-	-	-	-	-	-	-	-	-	-	-	-	-	-	-	-	-	-	-	-	-	-	-	-	-	-	-	-	-	-	-	-	-	-	-	-	-	-	-	-	-	-	-	-
1_19624732	1	73.10837621	AA	AA	AA	BB	BB	AA	BB	BB	AA	AA	-	BB	AA	BB	AA	AA	AA	BB	BB	AA	AA	BB	AA	AA	BB	BB	AA	BB	AA	AA	AA	BB	AA	AA	BB	AA	BB	AA	BB	BB	BB	BB	BB	AA	AA	AA	AA
1_19627150	1	73.10837626	AA	AA	AA	BB	BB	AA	BB	BB	AA	AA	-	BB	AA	BB	AA	AA	AA	BB	BB	AA	AA	BB	AA	AA	BB	BB	AA	BB	AA	AA	AA	BB	AA	AA	BB	AA	BB	AA	BB	BB	BB	BB	BB	AA	AA	AA	AA
1_19630741	1	73.10837631	AA	AA	AA	BB	BB	AA	BB	BB	AA	AA	-	BB	AA	BB	AA	AA	AA	BB	BB	AA	AA	BB	AA	AA	BB	BB	AA	BB	AA	AA	AA	BB	AA	AA	BB	AA	BB	AA	BB	BB	BB	BB	BB	AA	AA	AA	AA
1_19632544	1	73.10837636	AA	AA	AA	BB	BB	AA	BB	BB	AA	AA	-	BB	AA	BB	AA	AA	AA	BB	BB	AA	AA	BB	AA	AA	BB	BB	AA	BB	AA	AA	AA	BB	AA	AA	BB	AA	BB	AA	BB	BB	BB	BB	BB	AA	AA	AA	AA
1_19642543	1	73.10837641	AA	AA	AA	BB	BB	AA	BB	BB	AA	AA	-	BB	AA	BB	AA	AA	AA	BB	BB	AA	AA	BB	AA	AA	BB	BB	AA	BB	AA	AA	AA	BB	AA	AA	BB	AA	BB	AA	BB	BB	BB	BB	BB	AA	AA	AA	AA
1_19655460	1	73.10837646	AA	AA	AA	BB	BB	AA	BB	BB	AA	AA	-	BB	AA	BB	AA	AA	AA	BB	BB	AA	AA	BB	AA	AA	BB	BB	AA	BB	AA	AA	AA	BB	AA	AA	BB	AA	BB	AA	BB	BB	BB	BB	BB	AA	AA	AA	AA
1_19684305	1	73.10837651	AA	AA	AA	BB	BB	AA	BB	BB	AA	AA	-	BB	AA	BB	AA	AA	AA	BB	BB	AA	AA	BB	AA	AA	BB	BB	AA	BB	AA	AA	AA	BB	AA	AA	BB	AA	BB	AA	BB	BB	BB	BB	BB	AA	AA	AA	AA
1_19745381	1	73.10837656	AA	AA	AA	BB	BB	AA	BB	BB	AA	AA	-	BB	AA	BB	AA	AA	AA	BB	BB	AA	AA	BB	AA	AA	BB	BB	AA	BB	AA	AA	AA	BB	AA	AA	BB	AA	BB	AA	BB	BB	BB	BB	BB	AA	AA	AA	AA
1_19746941	1	73.10837661	AA	AA	AA	BB	BB	AA	BB	BB	AA	AA	-	BB	AA	BB	AA	AA	AA	BB	BB	AA	AA	BB	AA	AA	BB	BB	AA	BB	AA	AA	AA	BB	AA	AA	BB	AA	BB	AA	BB	BB	BB	BB	BB	AA	AA	AA	AA
1_19748561	1	73.10837666	AA	AA	AA	BB	BB	AA	BB	BB	AA	AA	-	BB	AA	BB	AA	AA	AA	BB	BB	AA	AA	BB	AA	AA	BB	BB	AA	BB	AA	AA	AA	BB	AA	AA	BB	AA	BB	AA	BB	BB	BB	BB	BB	AA	AA	AA	AA
1_19774605	1	74.00630673	AA	AA	AA	BB	BB	AA	BB	BB	AA	AA	AA	BB	AA	BB	AA	AA	AA	BB	BB	AA	AA	BB	AA	AA	BB	BB	AA	BB	AA	AA	AA	BB	AA	AA	BB	AA	BB	AA	BB	BB	BB	BB	BB	AA	AA	AA	AA
1_19781097	1	74.00630678	AA	AA	AA	BB	BB	AA	BB	BB	AA	AA	AA	BB	AA	BB	AA	AA	AA	BB	BB	AA	AA	BB	AA	AA	BB	BB	AA	BB	AA	AA	AA	BB	AA	AA	BB	AA	BB	AA	BB	BB	BB	BB	BB	AA	AA	AA	AA
1_19810828	1	74.00630683	AA	AA	AA	BB	BB	AA	BB	BB	AA	AA	AA	BB	AA	BB	AA	AA	AA	BB	BB	AA	AA	BB	AA	AA	BB	BB	AA	BB	AA	AA	AA	BB	AA	AA	-	AA	BB	AA	BB	BB	BB	BB	BB	AA	AA	AA	AA
1_19811833	1	74.00630688	AA	AA	AA	BB	BB	AA	BB	BB	AA	AA	AA	BB	AA	BB	AA	AA	AA	BB	BB	AA	AA	BB	AA	AA	BB	BB	AA	BB	AA	AA	AA	BB	AA	AA	-	AA	BB	AA	BB	BB	BB	BB	BB	AA	AA	AA	AA
1_19818273	1	74.00630693	AA	AA	AA	BB	BB	AA	BB	BB	AA	AA	AA	BB	AA	BB	AA	AA	AA	BB	BB	AA	AA	BB	AA	AA	BB	BB	AA	BB	AA	AA	AA	BB	AA	AA	-	AA	BB	AA	BB	BB	BB	BB	BB	AA	AA	AA	AA
1_19825475	1	74.00630698	AA	AA	AA	BB	BB	AA	BB	BB	AA	AA	AA	BB	AA	BB	AA	AA	AA	BB	BB	AA	AA	BB	AA	AA	BB	BB	AA	BB	AA	AA	AA	BB	AA	AA	-	AA	BB	AA	BB	BB	BB	BB	BB	AA	AA	AA	AA
1_19829758	1	74.00630703	AA	AA	AA	BB	BB	AA	BB	BB	AA	AA	AA	BB	AA	BB	AA	AA	AA	BB	BB	AA	AA	BB	AA	AA	BB	BB	AA	BB	AA	AA	AA	BB	AA	AA	-	AA	BB	AA	BB	BB	BB	BB	BB	AA	AA	AA	AA
1_19835729	1	74.00630708	AA	AA	AA	BB	BB	AA	BB	BB	AA	AA	AA	BB	AA	BB	AA	AA	AA	BB	BB	AA	AA	BB	AA	AA	BB	BB	AA	BB	AA	AA	AA	BB	AA	AA	-	AA	BB	AA	BB	BB	BB	BB	BB	AA	AA	AA	AA
1_19835955	1	74.00630713	AA	AA	AA	BB	BB	AA	BB	BB	AA	AA	AA	BB	AA	BB	AA	AA	AA	BB	BB	AA	AA	BB	AA	AA	BB	BB	AA	BB	AA	AA	AA	BB	AA	AA	-	AA	BB	AA	BB	BB	BB	BB	BB	AA	AA	AA	AA
1_19843558	1	74.00630718	AA	AA	AA	BB	BB	AA	BB	BB	AA	AA	AA	BB	AA	BB	AA	AA	AA	BB	BB	AA	AA	BB	AA	AA	BB	BB	AA	BB	AA	AA	AA	BB	AA	AA	-	AA	BB	AA	BB	BB	BB	BB	BB	AA	AA	AA	AA
1_19843764	1	74.00630723	AA	AA	AA	BB	BB	AA	BB	BB	AA	AA	AA	BB	AA	BB	AA	AA	AA	BB	BB	AA	AA	BB	AA	AA	BB	BB	AA	BB	AA	AA	AA	BB	AA	AA	-	AA	BB	AA	BB	BB	BB	BB	BB	AA	AA	AA	AA
1_19845107	1	74.00630728	AA	AA	AA	BB	BB	AA	BB	BB	AA	AA	AA	BB	AA	BB	AA	AA	AA	BB	BB	AA	AA	BB	AA	AA	BB	BB	AA	BB	AA	AA	AA	BB	AA	AA	-	AA	BB	AA	BB	BB	BB	BB	BB	AA	AA	AA	AA
1_19853349	1	74.00630733	AA	AA	AA	BB	BB	AA	BB	BB	AA	AA	AA	BB	AA	BB	AA	AA	AA	BB	BB	AA	AA	BB	AA	AA	BB	BB	AA	BB	AA	AA	AA	BB	AA	AA	-	AA	BB	AA	BB	BB	BB	BB	BB	AA	AA	AA	AA
1_19858518	1	74.00630738	AA	AA	AA	BB	BB	AA	BB	BB	AA	AA	AA	BB	AA	BB	AA	AA	AA	BB	BB	AA	AA	BB	AA	AA	BB	BB	AA	BB	AA	AA	AA	BB	AA	AA	-	AA	BB	AA	BB	BB	BB	BB	BB	AA	AA	AA	AA
1_19870038	1	74.00630743	-	-	-	-	-	-	-	-	-	-	-	-	-	-	-	-	-	-	-	-	-	-	-	-	-	-	-	-	-	-	-	-	-	-	-	-	-	-	-	-	-	-	-	-	-	-	-
1_19901289	1	74.00630748	AA	AA	AA	BB	BB	AA	BB	BB	AA	AA	AA	BB	AA	BB	AA	AA	AA	BB	BB	AA	AA	BB	AA	AA	BB	BB	AA	BB	AA	AA	AA	BB	AA	AA	-	AA	BB	AA	BB	BB	BB	BB	BB	AA	AA	AA	AA
1_19908497	1	74.00630753	AA	AA	AA	BB	BB	AA	BB	BB	AA	AA	AA	BB	AA	BB	AA	AA	AA	BB	BB	AA	AA	BB	AA	AA	BB	BB	AA	BB	AA	AA	AA	BB	AA	AA	-	AA	BB	AA	BB	BB	BB	BB	BB	AA	AA	AA	AA
1_19913575	1	74.00630758	AA	AA	AA	BB	BB	AA	BB	BB	AA	AA	AA	BB	AA	BB	AA	AA	AA	BB	BB	AA	AA	BB	AA	AA	BB	BB	AA	BB	AA	AA	AA	BB	AA	AA	-	AA	BB	AA	BB	BB	BB	BB	BB	AA	AA	AA	AA
1_19916244	1	74.00630763	AA	AA	AA	BB	BB	AA	BB	BB	AA	AA	AA	BB	AA	BB	AA	AA	AA	BB	BB	AA	AA	BB	AA	AA	BB	BB	AA	BB	AA	AA	AA	BB	AA	AA	-	AA	BB	AA	BB	BB	BB	BB	BB	AA	AA	AA	AA
1_19918573	1	74.00630768	AA	AA	AA	BB	BB	AA	BB	BB	AA	AA	AA	BB	AA	BB	AA	AA	AA	BB	BB	AA	AA	BB	AA	AA	BB	BB	AA	BB	AA	AA	AA	BB	AA	AA	-	AA	BB	AA	BB	BB	BB	BB	BB	AA	AA	AA	AA
1_19927795	1	74.00630773	-	-	-	-	-	-	-	-	-	-	-	-	-	-	-	-	-	-	-	-	-	-	-	-	-	-	-	-	-	-	-	-	-	-	-	-	-	-	-	-	-	-	-	-	-	-	-
1_19928369	1	74.00630778	-	-	-	-	-	-	-	-	-	-	-	-	-	-	-	-	-	-	-	-	-	-	-	-	-	-	-	-	-	-	-	-	-	-	-	-	-	-	-	-	-	-	-	-	-	-	-
1_19928610	1	74.00630783	-	-	-	-	-	-	-	-	-	-	-	-	-	-	-	-	-	-	-	-	-	-	-	-	-	-	-	-	-	-	-	-	-	-	-	-	-	-	-	-	-	-	-	-	-	-	-
1_19929571	1	74.00630788	-	-	-	-	-	-	-	-	-	-	-	-	-	-	-	-	-	-	-	-	-	-	-	-	-	-	-	-	-	-	-	-	-	-	-	-	-	-	-	-	-	-	-	-	-	-	-
1_19937570	1	74.00630793	-	-	-	-	-	-	-	-	-	-	-	-	-	-	-	-	-	-	-	-	-	-	-	-	-	-	-	-	-	-	-	-	-	-	-	-	-	-	-	-	-	-	-	-	-	-	-
1_19938082	1	74.00630798	-	-	-	-	-	-	-	-	-	-	-	-	-	-	-	-	-	-	-	-	-	-	-	-	-	-	-	-	-	-	-	-	-	-	-	-	-	-	-	-	-	-	-	-	-	-	-
1_19973483	1	74.00630803	-	-	-	-	-	-	-	-	-	-	-	-	-	-	-	-	-	-	-	-	-	-	-	-	-	-	-	-	-	-	-	-	-	-	-	-	-	-	-	-	-	-	-	-	-	-	-
1_19978410	1	74.00630808	-	-	-	-	-	-	-	-	-	-	-	-	-	-	-	-	-	-	-	-	-	-	-	-	-	-	-	-	-	-	-	-	-	-	-	-	-	-	-	-	-	-	-	-	-	-	-
1_19996564	1	74.00630813	-	-	-	-	-	-	-	-	-	-	-	-	-	-	-	-	-	-	-	-	-	-	-	-	-	-	-	-	-	-	-	-	-	-	-	-	-	-	-	-	-	-	-	-	-	-	-
1_20000076	1	74.00630818	AA	AA	AA	BB	BB	AA	BB	BB	AA	AA	AA	BB	AA	BB	AA	AA	AA	BB	BB	AA	AA	BB	AA	AA	BB	BB	AA	BB	AA	AA	AA	BB	AA	AA	-	AA	BB	AA	BB	BB	BB	BB	BB	AA	AA	AA	AA
1_20012675	1	74.00630823	-	-	-	-	-	-	-	-	-	-	-	-	-	-	-	-	-	-	-	-	-	-	-	-	-	-	-	-	-	-	-	-	-	-	-	-	-	-	-	-	-	-	-	-	-	-	-
1_20014178	1	74.38603035	-	-	-	-	-	-	-	-	-	-	-	-	-	-	-	-	-	-	-	-	-	-	-	-	-	-	-	-	-	-	-	-	-	-	-	-	-	-	-	-	-	-	-	-	-	-	-
1_20016339	1	74.3860304	-	-	-	-	-	-	-	-	-	-	-	-	-	-	-	-	-	-	-	-	-	-	-	-	-	-	-	-	-	-	-	-	-	-	-	-	-	-	-	-	-	-	-	-	-	-	-
1_20016629	1	74.38603045	-	-	-	-	-	-	-	-	-	-	-	-	-	-	-	-	-	-	-	-	-	-	-	-	-	-	-	-	-	-	-	-	-	-	-	-	-	-	-	-	-	-	-	-	-	-	-
1_20024197	1	74.3860305	-	-	-	-	-	-	-	-	-	-	-	-	-	-	-	-	-	-	-	-	-	-	-	-	-	-	-	-	-	-	-	-	-	-	-	-	-	-	-	-	-	-	-	-	-	-	-
1_20042478	1	74.38603055	-	-	-	-	-	-	-	-	-	-	-	-	-	-	-	-	-	-	-	-	-	-	-	-	-	-	-	-	-	-	-	-	-	-	-	-	-	-	-	-	-	-	-	-	-	-	-
1_20050359	1	74.3860306	AA	AA	AA	BB	BB	AA	BB	BB	AA	AA	AA	BB	AA	BB	AA	AA	AA	BB	BB	AA	AA	BB	AA	AA	BB	BB	AA	BB	AA	AA	AA	BB	AA	AA	-	AA	BB	AA	BB	BB	BB	BB	BB	AA	AA	AA	AA
1_20062413	1	74.38603065	-	-	-	-	-	-	-	-	-	-	-	-	-	-	-	-	-	-	-	-	-	-	-	-	-	-	-	-	-	-	-	-	-	-	-	-	-	-	-	-	-	-	-	-	-	-	-
1_20063305	1	74.3860307	AA	AA	AA	BB	BB	AA	BB	BB	AA	AA	AA	BB	AA	BB	AA	AA	AA	BB	BB	AA	AA	BB	AA	AA	BB	BB	AA	BB	AA	AA	AA	BB	AA	AA	-	AA	BB	AA	BB	BB	BB	BB	BB	AA	AA	AA	AA
1_20066385	1	74.38603075	AA	AA	AA	BB	BB	AA	BB	BB	AA	AA	AA	BB	AA	BB	AA	AA	AA	BB	BB	AA	AA	BB	AA	AA	BB	BB	AA	BB	AA	AA	AA	BB	AA	AA	-	AA	BB	AA	BB	BB	BB	BB	BB	AA	AA	AA	AA
1_20068403	1	74.3860308	AA	AA	AA	BB	BB	AA	BB	BB	AA	AA	AA	BB	AA	BB	AA	AA	AA	BB	BB	AA	AA	BB	AA	AA	BB	BB	AA	BB	AA	AA	AA	BB	AA	AA	-	AA	BB	AA	BB	BB	BB	BB	BB	AA	AA	AA	AA
1_20086570	1	74.38603085	AA	AA	AA	BB	BB	AA	BB	BB	AA	AA	AA	BB	AA	BB	AA	AA	AA	BB	BB	AA	AA	BB	AA	AA	BB	BB	AA	BB	AA	AA	AA	BB	AA	AA	-	AA	BB	AA	BB	BB	BB	BB	BB	AA	AA	AA	AA
1_20089198	1	74.3860309	AA	AA	AA	BB	BB	AA	BB	BB	AA	AA	AA	BB	AA	BB	AA	AA	AA	BB	BB	AA	AA	BB	AA	AA	BB	BB	AA	BB	AA	AA	AA	BB	AA	AA	-	AA	BB	AA	BB	BB	BB	BB	BB	AA	AA	AA	AA
1_20092892	1	74.38603095	AA	AA	AA	BB	BB	AA	BB	BB	AA	AA	AA	BB	AA	BB	AA	AA	AA	BB	BB	AA	AA	BB	AA	AA	BB	BB	AA	BB	AA	AA	AA	BB	AA	AA	-	AA	BB	AA	BB	BB	BB	BB	BB	AA	AA	AA	AA
1_20097294	1	74.386031	AA	AA	AA	BB	BB	AA	BB	BB	AA	AA	AA	BB	AA	BB	AA	AA	AA	BB	BB	AA	AA	BB	AA	AA	BB	BB	AA	BB	AA	AA	AA	BB	AA	AA	-	AA	BB	AA	BB	BB	BB	BB	BB	AA	AA	AA	AA
1_20105209	1	74.38603105	AA	AA	AA	BB	BB	AA	BB	BB	AA	AA	AA	BB	AA	BB	AA	AA	AA	BB	BB	AA	AA	BB	AA	AA	BB	BB	AA	BB	AA	AA	AA	BB	AA	AA	-	AA	BB	AA	BB	BB	BB	BB	BB	AA	AA	AA	AA
1_20106240	1	74.3860311	AA	AA	AA	BB	BB	AA	BB	BB	AA	AA	AA	BB	AA	BB	AA	AA	AA	BB	BB	AA	AA	BB	AA	AA	BB	BB	AA	BB	AA	AA	AA	BB	AA	AA	-	AA	BB	AA	BB	BB	BB	BB	BB	AA	AA	AA	AA
1_20106821	1	74.38603115	AA	AA	AA	BB	BB	AA	BB	BB	AA	AA	AA	BB	AA	BB	AA	AA	AA	BB	BB	AA	AA	BB	AA	AA	BB	BB	AA	BB	AA	AA	AA	BB	AA	AA	-	AA	BB	AA	BB	BB	BB	BB	BB	AA	AA	AA	AA
1_20107022	1	74.3860312	AA	AA	AA	BB	BB	AA	BB	BB	AA	AA	AA	BB	AA	BB	AA	AA	AA	BB	BB	AA	AA	BB	AA	AA	BB	BB	AA	BB	AA	AA	AA	BB	AA	AA	-	AA	BB	AA	BB	BB	BB	BB	BB	AA	AA	AA	AA
1_20107058	1	74.38603125	AA	AA	AA	BB	BB	AA	BB	BB	AA	AA	AA	BB	AA	BB	AA	AA	AA	BB	BB	AA	AA	BB	AA	AA	BB	BB	AA	BB	AA	AA	AA	BB	AA	AA	-	AA	BB	AA	BB	BB	BB	BB	BB	AA	AA	AA	AA
1_20138015	1	74.3860313	AA	AA	AA	BB	BB	AA	BB	BB	AA	AA	AA	BB	AA	BB	AA	AA	AA	BB	BB	AA	AA	BB	AA	AA	BB	BB	AA	BB	AA	AA	AA	BB	AA	AA	-	AA	BB	AA	BB	BB	BB	BB	BB	AA	AA	AA	AA
1_20140248	1	74.42295183	AA	AA	AA	BB	BB	AA	BB	BB	AA	AA	AA	BB	AA	BB	AA	AA	AA	BB	BB	AA	AA	BB	AA	AA	BB	BB	AA	BB	AA	AA	AA	BB	AA	AA	-	AA	BB	AA	BB	BB	BB	BB	BB	AA	AA	AA	AA
1_20141910	1	74.42295188	AA	AA	AA	BB	BB	AA	BB	BB	AA	AA	AA	BB	AA	BB	AA	AA	AA	BB	BB	AA	AA	BB	AA	AA	BB	BB	AA	BB	AA	AA	AA	BB	AA	AA	-	AA	BB	AA	BB	BB	BB	BB	BB	AA	AA	AA	AA
1_20144417	1	74.42295193	AA	AA	AA	BB	BB	AA	BB	BB	AA	AA	AA	BB	AA	BB	AA	AA	AA	BB	BB	AA	AA	BB	AA	AA	BB	BB	AA	BB	AA	AA	AA	BB	AA	AA	-	AA	BB	AA	BB	BB	BB	BB	BB	AA	AA	AA	AA
1_20150554	1	74.42295198	AA	AA	AA	BB	BB	AA	BB	BB	AA	AA	AA	BB	AA	BB	AA	AA	AA	BB	BB	AA	AA	BB	AA	AA	BB	BB	AA	BB	AA	AA	AA	BB	AA	AA	-	AA	BB	AA	BB	BB	BB	BB	BB	AA	AA	AA	AA
1_20155295	1	74.42295203	-	-	-	-	-	-	-	-	-	-	-	-	-	-	-	-	-	-	-	-	-	-	-	-	-	-	-	-	-	-	-	-	-	-	-	-	-	-	-	-	-	-	-	-	-	-	-
1_20169206	1	74.42295208	AA	AA	AA	BB	BB	AA	BB	BB	AA	AA	AA	BB	AA	BB	AA	AA	AA	BB	BB	AA	AA	BB	AA	AA	BB	BB	AA	BB	AA	AA	AA	BB	AA	AA	-	AA	BB	AA	BB	BB	BB	BB	BB	AA	AA	AA	AA
1_20170832	1	74.42295213	-	-	-	-	-	-	-	-	-	-	-	-	-	-	-	-	-	-	-	-	-	-	-	-	-	-	-	-	-	-	-	-	-	-	-	-	-	-	-	-	-	-	-	-	-	-	-
1_20171679	1	74.42295218	AA	AA	AA	BB	BB	AA	BB	BB	AA	AA	AA	BB	AA	BB	AA	AA	AA	BB	BB	AA	AA	BB	AA	AA	BB	BB	AA	BB	AA	AA	AA	BB	AA	AA	-	AA	BB	AA	BB	BB	BB	BB	BB	AA	AA	AA	AA
1_20243796	1	74.42295223	-	-	-	-	-	-	-	-	-	-	-	-	-	-	-	-	-	-	-	-	-	-	-	-	-	-	-	-	-	-	-	-	-	-	-	-	-	-	-	-	-	-	-	-	-	-	-
1_20245507	1	74.42295228	AA	AA	AA	BB	BB	AA	BB	BB	AA	AA	AA	BB	AA	BB	AA	AA	AA	BB	BB	AA	AA	BB	AA	AA	BB	BB	AA	BB	AA	AA	AA	BB	AA	AA	-	AA	BB	AA	BB	BB	BB	BB	BB	AA	AA	AA	AA
1_20410678	1	75.22493287	AA	AA	AA	BB	BB	AA	BB	BB	AA	AA	AA	BB	AA	BB	AA	AA	AA	BB	BB	AA	AA	BB	AA	AA	BB	BB	AA	BB	AA	AA	AA	BB	AA	AA	AA	AA	BB	AA	BB	BB	BB	BB	BB	AA	AA	AA	AA
1_20419691	1	75.22493292	AA	AA	AA	BB	BB	AA	BB	BB	AA	AA	AA	BB	AA	BB	AA	AA	AA	BB	BB	AA	AA	BB	AA	AA	BB	BB	AA	BB	AA	AA	AA	BB	AA	AA	AA	AA	BB	AA	BB	BB	BB	BB	BB	AA	AA	AA	AA
1_20449529	1	75.22493297	AA	AA	AA	BB	BB	AA	BB	BB	AA	AA	AA	BB	AA	BB	AA	AA	AA	BB	BB	AA	AA	BB	AA	AA	BB	BB	AA	BB	AA	AA	AA	BB	AA	AA	AA	AA	BB	AA	BB	BB	BB	BB	BB	AA	AA	AA	AA
1_20504185	1	75.22493302	AA	AA	AA	BB	BB	AA	BB	BB	AA	AA	AA	BB	AA	BB	AA	AA	AA	BB	BB	AA	AA	BB	AA	AA	BB	BB	AA	BB	AA	AA	AA	BB	AA	AA	AA	AA	BB	AA	BB	BB	BB	BB	BB	AA	AA	AA	AA
1_20510777	1	75.22493307	AA	AA	AA	BB	BB	AA	BB	BB	AA	AA	AA	BB	AA	BB	AA	AA	AA	BB	BB	AA	AA	BB	AA	AA	BB	BB	AA	BB	AA	AA	AA	BB	AA	AA	AA	AA	BB	AA	BB	BB	BB	BB	BB	AA	AA	AA	AA
1_20525393	1	75.22493312	AA	AA	AA	BB	BB	AA	BB	BB	AA	AA	AA	BB	AA	BB	AA	AA	AA	BB	BB	AA	AA	BB	AA	AA	BB	BB	AA	BB	AA	AA	AA	BB	AA	AA	AA	AA	BB	AA	BB	BB	BB	BB	BB	AA	AA	AA	AA
1_20736880	1	75.72980909	-	-	-	-	-	-	-	-	-	-	-	-	-	-	-	-	-	-	-	-	-	-	-	-	-	-	-	-	-	-	-	-	-	-	-	-	-	-	-	-	-	-	-	-	-	-	-
1_20766790	1	75.72980914	AA	AA	AA	BB	BB	AA	BB	BB	AA	AA	AA	BB	AA	BB	AA	AA	AA	BB	BB	AA	AA	BB	AA	AA	BB	BB	AA	BB	AA	AA	AA	BB	AA	AA	AA	AA	BB	AA	BB	BB	BB	BB	BB	AA	AA	AA	AA
1_20817669	1	75.72980919	-	-	-	-	-	-	-	-	-	-	-	-	-	-	-	-	-	-	-	-	-	-	-	-	-	-	-	-	-	-	-	-	-	-	-	-	-	-	-	-	-	-	-	-	-	-	-
1_20822641	1	75.72980924	-	-	-	-	-	-	-	-	-	-	-	-	-	-	-	-	-	-	-	-	-	-	-	-	-	-	-	-	-	-	-	-	-	-	-	-	-	-	-	-	-	-	-	-	-	-	-
1_20822996	1	75.72980929	-	-	-	-	-	-	-	-	-	-	-	-	-	-	-	-	-	-	-	-	-	-	-	-	-	-	-	-	-	-	-	-	-	-	-	-	-	-	-	-	-	-	-	-	-	-	-
1_20828518	1	75.72980934	AA	AA	AA	BB	BB	AA	BB	BB	AA	AA	AA	BB	AA	BB	AA	AA	AA	BB	BB	AA	AA	BB	AA	AA	BB	BB	AA	BB	AA	AA	AA	BB	AA	AA	AA	AA	BB	AA	BB	BB	BB	BB	BB	AA	AA	AA	AA
1_20833758	1	75.72980939	-	-	-	-	-	-	-	-	-	-	-	-	-	-	-	-	-	-	-	-	-	-	-	-	-	-	-	-	-	-	-	-	-	-	-	-	-	-	-	-	-	-	-	-	-	-	-
1_20835603	1	75.72980944	-	-	-	-	-	-	-	-	-	-	-	-	-	-	-	-	-	-	-	-	-	-	-	-	-	-	-	-	-	-	-	-	-	-	-	-	-	-	-	-	-	-	-	-	-	-	-
1_20837049	1	75.72980949	-	-	-	-	-	-	-	-	-	-	-	-	-	-	-	-	-	-	-	-	-	-	-	-	-	-	-	-	-	-	-	-	-	-	-	-	-	-	-	-	-	-	-	-	-	-	-
1_20841055	1	75.72980954	-	-	-	-	-	-	-	-	-	-	-	-	-	-	-	-	-	-	-	-	-	-	-	-	-	-	-	-	-	-	-	-	-	-	-	-	-	-	-	-	-	-	-	-	-	-	-
1_20907536	1	75.72980959	-	-	-	-	-	-	-	-	-	-	-	-	-	-	-	-	-	-	-	-	-	-	-	-	-	-	-	-	-	-	-	-	-	-	-	-	-	-	-	-	-	-	-	-	-	-	-
1_20910622	1	75.72980964	-	-	-	-	-	-	-	-	-	-	-	-	-	-	-	-	-	-	-	-	-	-	-	-	-	-	-	-	-	-	-	-	-	-	-	-	-	-	-	-	-	-	-	-	-	-	-
1_20949886	1	75.72980969	AA	AA	AA	BB	BB	AA	BB	BB	AA	AA	AA	BB	AA	BB	AA	AA	AA	BB	BB	AA	AA	BB	AA	AA	BB	BB	AA	BB	AA	AA	AA	BB	AA	AA	AA	AA	BB	AA	BB	BB	BB	BB	BB	AA	AA	AA	AA
1_20950604	1	75.72980974	-	-	-	-	-	-	-	-	-	-	-	-	-	-	-	-	-	-	-	-	-	-	-	-	-	-	-	-	-	-	-	-	-	-	-	-	-	-	-	-	-	-	-	-	-	-	-
1_20961128	1	75.72980979	-	-	-	-	-	-	-	-	-	-	-	-	-	-	-	-	-	-	-	-	-	-	-	-	-	-	-	-	-	-	-	-	-	-	-	-	-	-	-	-	-	-	-	-	-	-	-
1_20983181	1	75.72980984	AA	AA	AA	BB	BB	AA	BB	BB	AA	AA	AA	BB	AA	BB	AA	AA	AA	BB	BB	AA	AA	BB	AA	AA	BB	BB	AA	BB	AA	AA	AA	BB	AA	AA	AA	AA	BB	AA	BB	BB	BB	BB	BB	AA	AA	AA	AA
1_20987736	1	75.72980989	AA	AA	AA	BB	BB	AA	BB	BB	AA	AA	AA	BB	AA	BB	AA	AA	AA	BB	BB	AA	AA	BB	AA	AA	BB	BB	AA	BB	AA	AA	AA	BB	AA	AA	AA	AA	BB	AA	BB	BB	BB	BB	BB	AA	AA	AA	AA
1_21062767	1	75.72980994	AA	AA	AA	BB	BB	AA	BB	BB	AA	AA	AA	BB	AA	BB	AA	AA	AA	BB	BB	AA	AA	BB	AA	AA	BB	BB	AA	BB	AA	AA	AA	BB	AA	AA	AA	AA	BB	AA	BB	BB	BB	BB	BB	AA	AA	AA	AA
1_21063558	1	75.72980999	AA	AA	AA	BB	BB	AA	BB	BB	AA	AA	AA	BB	AA	BB	AA	AA	AA	BB	BB	AA	AA	BB	AA	AA	BB	BB	AA	BB	AA	AA	AA	BB	AA	AA	AA	AA	BB	AA	BB	BB	BB	BB	BB	AA	AA	AA	AA
1_21063884	1	75.72981004	AA	AA	AA	BB	BB	AA	BB	BB	AA	AA	AA	BB	AA	BB	AA	AA	AA	BB	BB	AA	AA	BB	AA	AA	BB	BB	AA	BB	AA	AA	AA	BB	AA	AA	AA	AA	BB	AA	BB	BB	BB	BB	BB	AA	AA	AA	AA
1_21071802	1	75.72981009	AA	AA	AA	BB	BB	AA	BB	BB	AA	AA	AA	BB	AA	BB	AA	AA	AA	BB	BB	AA	AA	BB	AA	AA	BB	BB	AA	BB	AA	AA	AA	BB	AA	AA	AA	AA	BB	AA	BB	BB	BB	BB	BB	AA	AA	AA	AA
1_21101358	1	75.72981014	AA	AA	AA	BB	BB	AA	BB	BB	AA	AA	AA	BB	AA	BB	AA	AA	AA	BB	BB	AA	AA	BB	AA	AA	BB	BB	AA	BB	AA	AA	AA	BB	AA	AA	AA	AA	BB	AA	BB	BB	BB	BB	BB	AA	AA	AA	AA
1_21113232	1	75.72981019	AA	AA	AA	BB	BB	AA	BB	BB	AA	AA	AA	BB	AA	BB	AA	AA	AA	BB	BB	AA	AA	BB	AA	AA	BB	BB	AA	BB	AA	AA	AA	BB	AA	AA	AA	AA	BB	AA	BB	BB	BB	BB	BB	AA	AA	AA	AA
1_21118194	1	75.72981024	AA	AA	AA	BB	BB	AA	BB	BB	AA	AA	AA	BB	AA	BB	AA	AA	AA	BB	BB	AA	AA	BB	AA	AA	BB	BB	AA	BB	AA	AA	AA	BB	AA	AA	AA	AA	BB	AA	BB	BB	BB	BB	BB	AA	AA	AA	AA
1_21133561	1	76.16994774	AA	AA	AA	BB	BB	AA	BB	BB	AA	AA	AA	-	AA	BB	AA	AA	AA	BB	BB	AA	AA	BB	AA	AA	BB	BB	AA	BB	AA	AA	AA	BB	AA	AA	AA	AA	BB	AA	BB	BB	BB	BB	BB	AA	AA	AA	AA
1_21137671	1	76.16994779	AA	AA	AA	BB	BB	AA	BB	BB	AA	AA	AA	-	AA	BB	AA	AA	AA	BB	BB	AA	AA	BB	AA	AA	BB	BB	AA	BB	AA	AA	AA	BB	AA	AA	AA	AA	BB	AA	BB	BB	BB	BB	BB	AA	AA	AA	AA
1_21149989	1	76.16994784	AA	AA	AA	BB	BB	AA	BB	BB	AA	AA	AA	-	AA	BB	AA	AA	AA	BB	BB	AA	AA	BB	AA	AA	BB	BB	AA	BB	AA	AA	AA	BB	AA	AA	AA	AA	BB	AA	BB	BB	BB	BB	BB	AA	AA	AA	AA
1_21153616	1	76.16994789	AA	AA	AA	BB	BB	AA	BB	BB	AA	AA	AA	-	AA	BB	AA	AA	AA	BB	BB	AA	AA	BB	AA	AA	BB	BB	AA	BB	AA	AA	AA	BB	AA	AA	AA	AA	BB	AA	BB	BB	BB	BB	BB	AA	AA	AA	AA
1_21158710	1	76.16994794	AA	AA	AA	BB	BB	AA	BB	BB	AA	AA	AA	-	AA	BB	AA	AA	AA	BB	BB	AA	AA	BB	AA	AA	BB	BB	AA	BB	AA	AA	AA	BB	AA	AA	AA	AA	BB	AA	BB	BB	BB	BB	BB	AA	AA	AA	AA
1_21160279	1	76.16994799	AA	AA	AA	BB	BB	AA	BB	BB	AA	AA	AA	-	AA	BB	AA	AA	AA	BB	BB	AA	AA	BB	AA	AA	BB	BB	AA	BB	AA	AA	AA	BB	AA	AA	AA	AA	BB	AA	BB	BB	BB	BB	BB	AA	AA	AA	AA
1_21163127	1	76.16994804	AA	AA	AA	BB	BB	AA	BB	BB	AA	AA	AA	-	AA	BB	AA	AA	AA	BB	BB	AA	AA	BB	AA	AA	BB	BB	AA	BB	AA	AA	AA	BB	AA	AA	AA	AA	BB	AA	BB	BB	BB	BB	BB	AA	AA	AA	AA
1_21172435	1	76.16994809	-	-	-	-	-	-	-	-	-	-	-	-	-	-	-	-	-	-	-	-	-	-	-	-	-	-	-	-	-	-	-	-	-	-	-	-	-	-	-	-	-	-	-	-	-	-	-
1_21183470	1	76.16994814	AA	AA	AA	BB	BB	AA	BB	BB	AA	AA	AA	-	AA	BB	AA	AA	AA	BB	BB	AA	AA	BB	AA	AA	BB	BB	AA	BB	AA	AA	AA	BB	AA	AA	AA	AA	BB	AA	BB	BB	BB	BB	BB	AA	AA	AA	AA
1_21194971	1	76.16994819	AA	AA	AA	BB	BB	AA	BB	BB	AA	AA	AA	-	AA	BB	AA	AA	AA	BB	BB	AA	AA	BB	AA	AA	BB	BB	AA	BB	AA	AA	AA	BB	AA	AA	AA	AA	BB	AA	BB	BB	BB	BB	BB	AA	AA	AA	AA
1_21195566	1	76.16994824	AA	AA	AA	BB	BB	AA	BB	BB	AA	AA	AA	-	AA	BB	AA	AA	AA	BB	BB	AA	AA	BB	AA	AA	BB	BB	AA	BB	AA	AA	AA	BB	AA	AA	AA	AA	BB	AA	BB	BB	BB	BB	BB	AA	AA	AA	AA
1_21216180	1	76.16994829	AA	AA	AA	BB	BB	AA	BB	BB	AA	AA	AA	-	AA	BB	AA	AA	AA	BB	BB	AA	AA	BB	AA	AA	BB	BB	AA	BB	AA	AA	AA	BB	AA	AA	AA	AA	BB	AA	BB	BB	BB	BB	BB	AA	AA	AA	AA
1_21253375	1	76.16994834	-	-	-	-	-	-	-	-	-	-	-	-	-	-	-	-	-	-	-	-	-	-	-	-	-	-	-	-	-	-	-	-	-	-	-	-	-	-	-	-	-	-	-	-	-	-	-
1_21255034	1	76.16994839	AA	AA	AA	BB	BB	AA	BB	BB	AA	AA	AA	-	AA	BB	AA	AA	AA	BB	BB	AA	AA	BB	AA	AA	BB	BB	AA	BB	AA	AA	AA	BB	AA	AA	AA	AA	BB	AA	BB	BB	BB	BB	BB	AA	AA	AA	AA
1_21267882	1	76.16994844	AA	AA	AA	BB	BB	AA	BB	BB	AA	AA	AA	-	AA	BB	AA	AA	AA	BB	BB	AA	AA	BB	AA	AA	BB	BB	AA	BB	AA	AA	AA	BB	AA	AA	AA	AA	BB	AA	BB	BB	BB	BB	BB	AA	AA	AA	AA
1_21308855	1	76.16994849	AA	AA	AA	BB	BB	AA	BB	BB	AA	AA	AA	-	AA	BB	AA	AA	AA	BB	BB	AA	AA	BB	AA	AA	BB	BB	AA	BB	AA	AA	AA	BB	AA	AA	AA	AA	BB	AA	BB	BB	BB	BB	BB	AA	AA	AA	AA
1_21309767	1	76.61667131	-	-	-	-	-	-	-	-	-	-	-	-	-	-	-	-	-	-	-	-	-	-	-	-	-	-	-	-	-	-	-	-	-	-	-	-	-	-	-	-	-	-	-	-	-	-	-
1_21315050	1	76.61667136	-	-	-	-	-	-	-	-	-	-	-	-	-	-	-	-	-	-	-	-	-	-	-	-	-	-	-	-	-	-	-	-	-	-	-	-	-	-	-	-	-	-	-	-	-	-	-
1_21315507	1	76.61667141	-	-	-	-	-	-	-	-	-	-	-	-	-	-	-	-	-	-	-	-	-	-	-	-	-	-	-	-	-	-	-	-	-	-	-	-	-	-	-	-	-	-	-	-	-	-	-
1_21316982	1	76.61667146	AA	AA	AA	BB	BB	AA	BB	BB	AA	AA	AA	-	AA	BB	AA	AA	AA	BB	BB	AA	AA	BB	AA	AA	BB	BB	AA	BB	AA	AA	AA	BB	AA	AA	AA	AA	BB	AA	BB	BB	BB	BB	BB	AA	AA	AA	AA
1_21317278	1	76.61667151	-	-	-	-	-	-	-	-	-	-	-	-	-	-	-	-	-	-	-	-	-	-	-	-	-	-	-	-	-	-	-	-	-	-	-	-	-	-	-	-	-	-	-	-	-	-	-
1_21317905	1	76.61667156	AA	AA	AA	BB	BB	AA	BB	BB	AA	AA	AA	-	AA	BB	AA	AA	AA	BB	BB	AA	AA	BB	AA	AA	BB	BB	AA	BB	AA	AA	AA	BB	AA	AA	AA	AA	BB	AA	BB	BB	BB	BB	BB	AA	AA	AA	AA
1_21328150	1	76.61667161	AA	AA	AA	BB	BB	AA	BB	BB	AA	AA	AA	-	AA	BB	AA	AA	AA	BB	BB	AA	AA	BB	AA	AA	BB	BB	AA	BB	AA	AA	AA	BB	AA	AA	AA	AA	BB	AA	BB	BB	BB	BB	BB	AA	AA	AA	AA
1_21335179	1	76.61667166	-	-	-	-	-	-	-	-	-	-	-	-	-	-	-	-	-	-	-	-	-	-	-	-	-	-	-	-	-	-	-	-	-	-	-	-	-	-	-	-	-	-	-	-	-	-	-
1_21337572	1	76.61667171	AA	AA	AA	BB	BB	AA	BB	BB	AA	AA	AA	-	AA	BB	AA	AA	AA	BB	BB	AA	AA	BB	AA	AA	BB	BB	AA	BB	AA	AA	AA	BB	AA	AA	AA	AA	BB	AA	BB	BB	BB	BB	BB	AA	AA	AA	AA
1_21367233	1	76.61667176	AA	AA	AA	BB	BB	AA	BB	BB	AA	AA	AA	AA	AA	BB	AA	AA	AA	BB	BB	AA	AA	BB	AA	AA	BB	BB	AA	BB	AA	AA	AA	BB	AA	AA	AA	AA	BB	AA	BB	BB	BB	BB	BB	AA	AA	AA	AA
1_21368941	1	76.61667181	AA	AA	AA	BB	BB	AA	BB	BB	AA	AA	AA	AA	AA	BB	AA	AA	AA	BB	BB	AA	AA	BB	AA	AA	BB	BB	AA	BB	AA	AA	AA	BB	AA	AA	AA	AA	BB	AA	BB	BB	BB	BB	BB	AA	AA	AA	AA
1_21386869	1	76.61667186	AA	AA	AA	BB	BB	AA	BB	BB	AA	AA	AA	AA	AA	BB	AA	AA	AA	BB	BB	AA	AA	BB	AA	AA	BB	BB	AA	BB	AA	AA	AA	BB	AA	AA	AA	AA	BB	AA	BB	BB	BB	BB	BB	AA	AA	AA	AA
1_21396467	1	76.61667191	AA	AA	AA	BB	BB	AA	BB	BB	AA	AA	AA	AA	AA	BB	AA	AA	AA	BB	BB	AA	AA	BB	AA	AA	BB	BB	AA	BB	AA	AA	AA	BB	AA	AA	AA	AA	BB	AA	BB	BB	BB	BB	BB	AA	AA	AA	AA
1_21407395	1	76.61667196	AA	AA	AA	BB	BB	AA	BB	BB	AA	AA	AA	AA	AA	BB	AA	AA	AA	BB	BB	AA	AA	BB	AA	AA	BB	BB	AA	BB	AA	AA	AA	BB	AA	AA	AA	AA	BB	AA	BB	BB	BB	BB	BB	AA	AA	AA	AA
1_21412757	1	76.61667201	AA	AA	AA	BB	BB	AA	BB	BB	AA	AA	AA	AA	AA	BB	AA	AA	AA	BB	BB	AA	AA	BB	AA	AA	BB	BB	AA	BB	AA	AA	AA	BB	AA	AA	AA	AA	BB	AA	BB	BB	BB	BB	BB	AA	AA	AA	AA
1_21416520	1	76.70388733	AA	AA	AA	BB	BB	AA	BB	BB	AA	-	AA	AA	AA	BB	AA	AA	AA	BB	BB	AA	AA	BB	AA	AA	BB	BB	AA	BB	AA	AA	AA	BB	AA	AA	AA	AA	BB	AA	BB	BB	BB	BB	BB	AA	AA	AA	AA
1_21418541	1	76.70388738	AA	AA	AA	BB	BB	AA	BB	BB	AA	-	AA	AA	AA	BB	AA	AA	AA	BB	BB	AA	AA	BB	AA	AA	BB	BB	AA	BB	AA	AA	AA	BB	AA	AA	AA	AA	BB	AA	BB	BB	BB	BB	BB	AA	AA	AA	AA
1_21418630	1	76.70388743	AA	AA	AA	BB	BB	AA	BB	BB	AA	-	AA	AA	AA	BB	AA	AA	AA	BB	BB	AA	AA	BB	AA	AA	BB	BB	AA	BB	AA	AA	AA	BB	AA	AA	AA	AA	BB	AA	BB	BB	BB	BB	BB	AA	AA	AA	AA
1_21425909	1	76.70388748	-	-	-	-	-	-	-	-	-	-	-	-	-	-	-	-	-	-	-	-	-	-	-	-	-	-	-	-	-	-	-	-	-	-	-	-	-	-	-	-	-	-	-	-	-	-	-
1_21431868	1	76.70388753	AA	AA	AA	BB	BB	AA	BB	BB	AA	-	AA	AA	AA	BB	AA	AA	AA	BB	BB	AA	AA	BB	AA	AA	BB	BB	AA	BB	AA	AA	AA	BB	AA	AA	AA	AA	BB	AA	BB	BB	BB	BB	BB	AA	AA	AA	AA
1_21451338	1	76.70388758	-	-	-	-	-	-	-	-	-	-	-	-	-	-	-	-	-	-	-	-	-	-	-	-	-	-	-	-	-	-	-	-	-	-	-	-	-	-	-	-	-	-	-	-	-	-	-
1_21453169	1	76.70388763	AA	AA	AA	BB	BB	AA	BB	BB	AA	-	AA	AA	AA	BB	AA	AA	AA	BB	BB	AA	AA	BB	AA	AA	BB	BB	AA	BB	AA	AA	AA	BB	AA	AA	AA	AA	BB	AA	BB	BB	BB	BB	BB	AA	AA	AA	AA
1_21457027	1	76.70388768	AA	AA	AA	BB	BB	AA	BB	BB	AA	-	AA	AA	AA	BB	AA	AA	AA	BB	BB	AA	AA	BB	AA	AA	BB	BB	AA	BB	AA	AA	AA	BB	AA	AA	AA	AA	BB	AA	BB	BB	BB	BB	BB	AA	AA	AA	AA
1_21461484	1	76.70388773	AA	AA	AA	BB	BB	AA	BB	BB	AA	-	AA	AA	AA	BB	AA	AA	AA	BB	BB	AA	AA	BB	AA	AA	BB	BB	AA	BB	AA	AA	AA	BB	AA	AA	AA	AA	BB	AA	BB	BB	BB	BB	BB	AA	AA	AA	AA
1_21468776	1	76.70388778	-	-	-	-	-	-	-	-	-	-	-	-	-	-	-	-	-	-	-	-	-	-	-	-	-	-	-	-	-	-	-	-	-	-	-	-	-	-	-	-	-	-	-	-	-	-	-
1_21473544	1	76.70388783	AA	AA	AA	BB	BB	AA	BB	BB	AA	-	AA	AA	AA	BB	AA	AA	AA	BB	BB	AA	AA	BB	AA	AA	BB	BB	AA	BB	AA	AA	AA	BB	AA	AA	AA	AA	BB	AA	BB	BB	BB	BB	BB	AA	AA	AA	AA
1_21485785	1	77.11355316	AA	AA	AA	BB	BB	AA	BB	BB	AA	-	AA	AA	AA	BB	AA	AA	AA	BB	BB	AA	AA	BB	AA	AA	BB	BB	AA	BB	AA	AA	AA	BB	AA	AA	AA	AA	BB	AA	BB	BB	BB	BB	BB	AA	AA	AA	AA
1_21497356	1	77.11355321	-	-	-	-	-	-	-	-	-	-	-	-	-	-	-	-	-	-	-	-	-	-	-	-	-	-	-	-	-	-	-	-	-	-	-	-	-	-	-	-	-	-	-	-	-	-	-
1_21507695	1	77.11355326	-	-	-	-	-	-	-	-	-	-	-	-	-	-	-	-	-	-	-	-	-	-	-	-	-	-	-	-	-	-	-	-	-	-	-	-	-	-	-	-	-	-	-	-	-	-	-
1_21512061	1	77.11355331	-	-	-	-	-	-	-	-	-	-	-	-	-	-	-	-	-	-	-	-	-	-	-	-	-	-	-	-	-	-	-	-	-	-	-	-	-	-	-	-	-	-	-	-	-	-	-
1_21512743	1	77.11355336	-	-	-	-	-	-	-	-	-	-	-	-	-	-	-	-	-	-	-	-	-	-	-	-	-	-	-	-	-	-	-	-	-	-	-	-	-	-	-	-	-	-	-	-	-	-	-
1_21519757	1	77.11355341	AA	AA	AA	BB	BB	AA	BB	BB	AA	-	AA	AA	AA	BB	AA	AA	AA	BB	BB	AA	AA	BB	AA	AA	BB	BB	AA	BB	AA	AA	AA	BB	AA	AA	AA	AA	BB	AA	BB	BB	BB	BB	BB	AA	AA	AA	AA
1_21520069	1	77.11355346	AA	AA	AA	BB	BB	AA	BB	BB	AA	-	AA	AA	AA	BB	AA	AA	AA	BB	BB	AA	AA	BB	AA	AA	BB	BB	AA	BB	AA	AA	AA	BB	AA	AA	AA	AA	BB	AA	BB	BB	BB	BB	BB	AA	AA	AA	AA
1_21530837	1	77.11355351	-	-	-	-	-	-	-	-	-	-	-	-	-	-	-	-	-	-	-	-	-	-	-	-	-	-	-	-	-	-	-	-	-	-	-	-	-	-	-	-	-	-	-	-	-	-	-
1_21536473	1	77.11355356	AA	AA	AA	BB	BB	AA	BB	BB	AA	-	AA	AA	AA	BB	AA	AA	AA	BB	BB	AA	AA	BB	AA	AA	BB	BB	AA	BB	AA	AA	AA	BB	AA	AA	AA	AA	BB	AA	BB	BB	BB	BB	BB	AA	AA	AA	AA
1_21544811	1	77.11355361	AA	AA	AA	BB	BB	AA	BB	BB	AA	-	AA	AA	AA	BB	AA	AA	AA	BB	BB	AA	AA	BB	AA	AA	BB	BB	AA	BB	AA	AA	AA	BB	AA	AA	AA	AA	BB	AA	BB	BB	BB	BB	BB	AA	AA	AA	AA
1_21556015	1	77.11355366	AA	AA	AA	BB	BB	AA	BB	BB	AA	-	AA	AA	AA	BB	AA	AA	AA	BB	BB	AA	AA	BB	AA	AA	BB	BB	AA	BB	AA	AA	AA	BB	AA	AA	AA	AA	BB	AA	BB	BB	BB	BB	BB	AA	AA	AA	AA
1_21563901	1	77.11355371	AA	AA	AA	BB	BB	AA	BB	BB	AA	-	AA	AA	AA	BB	AA	AA	AA	BB	BB	AA	AA	BB	AA	AA	BB	BB	AA	BB	AA	AA	AA	BB	AA	AA	AA	AA	BB	AA	BB	BB	BB	BB	BB	AA	AA	AA	AA
1_21565871	1	77.11355376	-	-	-	-	-	-	-	-	-	-	-	-	-	-	-	-	-	-	-	-	-	-	-	-	-	-	-	-	-	-	-	-	-	-	-	-	-	-	-	-	-	-	-	-	-	-	-
1_21581342	1	77.11355381	AA	AA	AA	BB	BB	AA	BB	BB	AA	-	AA	AA	AA	BB	AA	AA	AA	BB	BB	AA	AA	BB	AA	AA	BB	BB	AA	BB	AA	AA	AA	BB	AA	AA	AA	AA	BB	AA	BB	BB	BB	BB	BB	AA	AA	AA	AA
1_21585164	1	77.11355386	AA	AA	AA	BB	BB	AA	BB	BB	AA	-	AA	AA	AA	BB	AA	AA	AA	BB	BB	AA	AA	BB	AA	AA	BB	BB	AA	BB	AA	AA	AA	BB	AA	AA	AA	AA	BB	AA	BB	BB	BB	BB	BB	AA	AA	AA	AA
1_21607803	1	77.11355391	AA	AA	AA	BB	BB	AA	BB	BB	AA	-	AA	AA	AA	BB	AA	AA	AA	BB	BB	AA	AA	BB	AA	AA	BB	BB	AA	BB	AA	AA	AA	BB	AA	AA	AA	AA	BB	AA	BB	BB	BB	BB	BB	AA	AA	AA	AA
1_21630933	1	77.11355396	AA	AA	AA	BB	BB	AA	BB	BB	AA	-	AA	AA	AA	BB	AA	AA	AA	BB	BB	AA	AA	BB	AA	AA	BB	BB	AA	BB	AA	AA	AA	BB	AA	AA	AA	AA	BB	AA	BB	BB	BB	BB	BB	AA	AA	AA	AA
1_21639799	1	77.11355401	AA	AA	AA	BB	BB	AA	BB	BB	AA	-	AA	AA	AA	BB	AA	AA	AA	BB	BB	AA	AA	BB	AA	AA	BB	BB	AA	BB	AA	AA	AA	BB	AA	AA	AA	AA	BB	AA	BB	BB	BB	BB	BB	AA	AA	AA	AA
1_21660549	1	77.11355406	AA	AA	AA	BB	BB	AA	BB	BB	AA	-	AA	AA	AA	BB	AA	AA	AA	BB	BB	AA	AA	BB	AA	AA	BB	BB	AA	BB	AA	AA	AA	BB	AA	AA	AA	AA	BB	AA	BB	BB	BB	BB	BB	AA	AA	AA	AA
1_21671914	1	77.11355411	AA	AA	AA	BB	BB	AA	BB	BB	AA	-	AA	AA	AA	BB	AA	AA	AA	BB	BB	AA	AA	BB	AA	AA	BB	BB	AA	BB	AA	AA	AA	BB	AA	AA	AA	AA	BB	AA	BB	BB	BB	BB	BB	AA	AA	AA	AA
1_21692808	1	77.11355416	AA	AA	AA	BB	BB	AA	BB	BB	AA	-	AA	AA	AA	BB	AA	AA	AA	BB	BB	AA	AA	BB	AA	AA	BB	BB	AA	BB	AA	AA	AA	BB	AA	AA	AA	AA	BB	AA	BB	BB	BB	BB	BB	AA	AA	AA	AA
1_21695477	1	77.58676169	AA	AA	AA	BB	BB	AA	BB	BB	AA	-	AA	AA	AA	BB	AA	AA	AA	BB	BB	AA	AA	BB	AA	AA	BB	BB	AA	BB	AA	AA	AA	BB	AA	AA	AA	AA	BB	AA	BB	BB	BB	BB	BB	AA	AA	AA	AA
1_21698752	1	77.58676174	AA	AA	AA	BB	BB	AA	BB	BB	AA	-	AA	AA	AA	BB	AA	AA	AA	BB	BB	AA	AA	BB	AA	AA	BB	BB	AA	BB	AA	AA	AA	BB	AA	AA	AA	AA	BB	AA	BB	BB	BB	BB	BB	AA	AA	AA	AA
1_21704875	1	77.58676179	AA	AA	AA	BB	BB	AA	BB	BB	AA	-	AA	AA	AA	BB	AA	AA	AA	BB	BB	AA	AA	BB	AA	AA	BB	BB	AA	BB	AA	AA	AA	BB	AA	AA	AA	AA	BB	AA	BB	BB	BB	BB	BB	AA	AA	AA	AA
1_21708982	1	77.58676184	-	-	-	-	-	-	-	-	-	-	-	-	-	-	-	-	-	-	-	-	-	-	-	-	-	-	-	-	-	-	-	-	-	-	-	-	-	-	-	-	-	-	-	-	-	-	-
1_21717483	1	77.58676189	AA	AA	AA	BB	BB	AA	BB	BB	AA	-	AA	AA	AA	BB	AA	AA	AA	BB	BB	AA	AA	BB	AA	AA	BB	BB	AA	BB	AA	AA	AA	BB	AA	AA	AA	AA	BB	AA	BB	BB	BB	BB	BB	AA	AA	AA	AA
1_21721465	1	77.58676194	AA	AA	AA	BB	BB	AA	BB	BB	AA	-	AA	AA	AA	BB	AA	AA	AA	BB	BB	AA	AA	BB	AA	AA	BB	BB	AA	BB	AA	AA	AA	BB	AA	AA	AA	AA	BB	AA	BB	BB	BB	BB	BB	AA	AA	AA	AA
1_21728087	1	77.58676199	AA	AA	AA	BB	BB	AA	BB	BB	AA	-	AA	AA	AA	BB	AA	AA	AA	BB	BB	AA	AA	BB	AA	AA	BB	BB	AA	BB	AA	AA	AA	BB	AA	AA	AA	AA	BB	AA	BB	BB	BB	BB	BB	AA	AA	AA	AA
1_21728381	1	77.58676204	AA	AA	AA	BB	BB	AA	BB	BB	AA	-	AA	AA	AA	BB	AA	AA	AA	BB	BB	AA	AA	BB	AA	AA	BB	BB	AA	BB	AA	AA	AA	BB	AA	AA	AA	AA	BB	AA	BB	BB	BB	BB	BB	AA	AA	AA	AA
1_21728448	1	77.58676209	AA	AA	AA	BB	BB	AA	BB	BB	AA	-	AA	AA	AA	BB	AA	AA	AA	BB	BB	AA	AA	BB	AA	AA	BB	BB	AA	BB	AA	AA	AA	BB	AA	AA	AA	AA	BB	AA	BB	BB	BB	BB	BB	AA	AA	AA	AA
1_21740818	1	77.58676214	AA	AA	AA	BB	BB	AA	BB	BB	AA	-	AA	AA	AA	BB	AA	AA	AA	BB	BB	AA	AA	BB	AA	AA	BB	BB	AA	BB	AA	AA	AA	BB	AA	AA	AA	AA	BB	AA	BB	BB	BB	BB	BB	AA	AA	AA	AA
1_21753699	1	77.58676219	AA	AA	AA	BB	BB	AA	BB	BB	AA	-	AA	AA	AA	BB	AA	AA	AA	BB	BB	AA	AA	BB	AA	AA	BB	BB	AA	BB	AA	AA	AA	BB	AA	AA	AA	AA	BB	AA	BB	BB	BB	BB	BB	AA	AA	AA	AA
1_21755895	1	77.58676224	AA	AA	AA	BB	BB	AA	BB	BB	AA	-	AA	AA	AA	BB	AA	AA	AA	BB	BB	AA	AA	BB	AA	AA	BB	BB	AA	BB	AA	AA	AA	BB	AA	AA	AA	AA	BB	AA	BB	BB	BB	BB	BB	AA	AA	AA	AA
1_21762851	1	77.58676229	AA	AA	AA	BB	BB	AA	BB	BB	AA	-	AA	AA	AA	BB	AA	AA	AA	BB	BB	AA	AA	BB	AA	AA	BB	BB	AA	BB	AA	AA	AA	BB	AA	AA	AA	AA	BB	AA	BB	BB	BB	BB	BB	AA	AA	AA	AA
1_21851199	1	77.58676234	AA	AA	AA	BB	BB	AA	BB	BB	AA	-	AA	AA	AA	BB	AA	AA	AA	BB	BB	AA	AA	BB	AA	AA	BB	BB	AA	BB	AA	AA	AA	BB	AA	AA	AA	AA	BB	AA	BB	BB	BB	BB	BB	AA	AA	AA	AA
1_21851663	1	77.58676239	AA	AA	AA	BB	BB	AA	BB	BB	AA	-	AA	AA	AA	BB	AA	AA	AA	BB	BB	AA	AA	BB	AA	AA	BB	BB	AA	BB	AA	AA	AA	BB	AA	AA	AA	AA	BB	AA	BB	BB	BB	BB	BB	AA	AA	AA	AA
1_21852277	1	77.58676244	AA	AA	AA	BB	BB	AA	BB	BB	AA	-	AA	AA	AA	BB	AA	AA	AA	BB	BB	AA	AA	BB	AA	AA	BB	BB	AA	BB	AA	AA	AA	BB	AA	AA	AA	AA	BB	AA	BB	BB	BB	BB	BB	AA	AA	AA	AA
1_21861108	1	77.58676249	-	-	-	-	-	-	-	-	-	-	-	-	-	-	-	-	-	-	-	-	-	-	-	-	-	-	-	-	-	-	-	-	-	-	-	-	-	-	-	-	-	-	-	-	-	-	-
1_21865697	1	77.58676254	-	-	-	-	-	-	-	-	-	-	-	-	-	-	-	-	-	-	-	-	-	-	-	-	-	-	-	-	-	-	-	-	-	-	-	-	-	-	-	-	-	-	-	-	-	-	-
1_21880194	1	78.55562392	AA	AA	AA	BB	BB	AA	BB	BB	AA	BB	AA	AA	AA	BB	AA	AA	AA	BB	BB	AA	AA	BB	AA	AA	BB	BB	AA	BB	AA	AA	AA	BB	AA	AA	AA	AA	BB	AA	BB	BB	BB	BB	BB	AA	AA	AA	-
1_21881799	1	78.55562397	AA	AA	AA	BB	BB	AA	BB	BB	AA	BB	AA	AA	AA	BB	AA	AA	AA	BB	BB	AA	AA	BB	AA	AA	BB	BB	AA	BB	AA	AA	AA	BB	AA	AA	AA	AA	BB	AA	BB	BB	BB	BB	BB	AA	AA	AA	-
1_21895882	1	78.55562402	-	-	-	-	-	-	-	-	-	-	-	-	-	-	-	-	-	-	-	-	-	-	-	-	-	-	-	-	-	-	-	-	-	-	-	-	-	-	-	-	-	-	-	-	-	-	-
1_21904938	1	78.55562407	AA	AA	AA	BB	BB	AA	BB	BB	AA	BB	AA	AA	AA	BB	AA	AA	AA	BB	BB	AA	AA	BB	AA	AA	BB	BB	AA	BB	AA	AA	AA	BB	AA	AA	AA	AA	BB	AA	BB	BB	BB	BB	BB	AA	AA	AA	-
1_21908859	1	78.55562412	AA	AA	AA	BB	BB	AA	BB	BB	AA	BB	AA	AA	AA	BB	AA	AA	AA	BB	BB	AA	AA	BB	AA	AA	BB	BB	AA	BB	AA	AA	AA	BB	AA	AA	AA	AA	BB	AA	BB	BB	BB	BB	BB	AA	AA	AA	-
1_21913152	1	78.55562417	AA	AA	AA	BB	BB	AA	BB	BB	AA	BB	AA	AA	AA	BB	AA	AA	AA	BB	BB	AA	AA	BB	AA	AA	BB	BB	AA	BB	AA	AA	AA	BB	AA	AA	AA	AA	BB	AA	BB	BB	BB	BB	BB	AA	AA	AA	-
1_21985256	1	78.55562422	AA	AA	AA	BB	BB	AA	BB	BB	AA	BB	AA	AA	AA	BB	AA	AA	AA	BB	BB	AA	AA	BB	AA	AA	BB	BB	AA	BB	AA	AA	AA	BB	AA	AA	AA	AA	BB	AA	BB	BB	BB	BB	BB	AA	AA	AA	-
1_22002275	1	78.55562427	AA	AA	AA	BB	BB	AA	BB	BB	AA	BB	AA	AA	AA	BB	AA	AA	AA	BB	BB	AA	AA	BB	AA	AA	BB	BB	AA	BB	AA	AA	AA	BB	AA	AA	AA	AA	BB	AA	BB	BB	BB	BB	BB	AA	AA	AA	-
1_22003243	1	78.55562432	-	-	-	-	-	-	-	-	-	-	-	-	-	-	-	-	-	-	-	-	-	-	-	-	-	-	-	-	-	-	-	-	-	-	-	-	-	-	-	-	-	-	-	-	-	-	-
1_22007143	1	78.55562437	AA	AA	AA	BB	BB	AA	BB	BB	AA	BB	AA	AA	AA	BB	AA	AA	AA	BB	BB	AA	AA	BB	AA	AA	BB	BB	AA	BB	AA	AA	AA	BB	AA	AA	AA	AA	BB	AA	BB	BB	BB	BB	BB	AA	AA	AA	-
1_22011560	1	78.55562442	AA	AA	AA	BB	BB	AA	BB	BB	AA	BB	AA	AA	AA	BB	AA	AA	AA	BB	BB	AA	AA	BB	AA	AA	BB	BB	AA	BB	AA	AA	AA	BB	AA	AA	AA	AA	BB	AA	BB	BB	BB	BB	BB	AA	AA	AA	-
1_22012010	1	78.55562447	AA	AA	AA	BB	BB	AA	BB	BB	AA	BB	AA	AA	AA	BB	AA	AA	AA	BB	BB	AA	AA	BB	AA	AA	BB	BB	AA	BB	AA	AA	AA	BB	AA	AA	AA	AA	BB	AA	BB	BB	BB	BB	BB	AA	AA	AA	-
1_22012876	1	78.55562452	AA	AA	AA	BB	BB	AA	BB	BB	AA	BB	AA	AA	AA	BB	AA	AA	AA	BB	BB	AA	AA	BB	AA	AA	BB	BB	AA	BB	AA	AA	AA	BB	AA	AA	AA	AA	BB	AA	BB	BB	BB	BB	BB	AA	AA	AA	-
1_22029068	1	78.55562457	AA	AA	AA	BB	BB	AA	BB	BB	AA	BB	AA	AA	AA	BB	AA	AA	AA	BB	BB	AA	AA	BB	AA	AA	BB	BB	AA	BB	AA	AA	AA	BB	AA	AA	AA	AA	BB	AA	BB	BB	BB	BB	BB	AA	AA	AA	-
1_22042577	1	78.55562462	-	-	-	-	-	-	-	-	-	-	-	-	-	-	-	-	-	-	-	-	-	-	-	-	-	-	-	-	-	-	-	-	-	-	-	-	-	-	-	-	-	-	-	-	-	-	-
1_22054783	1	78.55562467	AA	AA	AA	BB	BB	AA	BB	BB	AA	BB	AA	AA	AA	BB	AA	AA	AA	BB	BB	AA	AA	BB	AA	AA	BB	BB	AA	BB	AA	AA	AA	BB	AA	AA	AA	AA	BB	AA	BB	BB	BB	BB	BB	AA	AA	AA	-
1_22060454	1	78.55562472	AA	AA	AA	BB	BB	AA	BB	BB	AA	BB	AA	AA	AA	BB	AA	AA	AA	BB	BB	AA	AA	BB	AA	AA	BB	BB	AA	BB	AA	AA	AA	BB	AA	AA	AA	AA	BB	AA	BB	BB	BB	BB	BB	AA	AA	AA	-
1_22063575	1	78.55562477	AA	AA	AA	BB	BB	AA	BB	BB	AA	BB	AA	AA	AA	BB	AA	AA	AA	BB	BB	AA	AA	BB	AA	AA	BB	BB	AA	BB	AA	AA	AA	BB	AA	AA	AA	AA	BB	AA	BB	BB	BB	BB	BB	AA	AA	AA	-
1_22066431	1	78.55562482	AA	AA	AA	BB	BB	AA	BB	BB	AA	BB	AA	AA	AA	BB	AA	AA	AA	BB	BB	AA	AA	BB	AA	AA	BB	BB	AA	BB	AA	AA	AA	BB	AA	AA	AA	AA	BB	AA	BB	BB	BB	BB	BB	AA	AA	AA	-
1_22069167	1	78.55562487	AA	AA	AA	BB	BB	AA	BB	BB	AA	BB	AA	AA	AA	BB	AA	AA	AA	BB	BB	AA	AA	BB	AA	AA	BB	BB	AA	BB	AA	AA	AA	BB	AA	AA	AA	AA	BB	AA	BB	BB	BB	BB	BB	AA	AA	AA	-
1_22069196	1	78.55562492	AA	AA	AA	BB	BB	AA	BB	BB	AA	BB	AA	AA	AA	BB	AA	AA	AA	BB	BB	AA	AA	BB	AA	AA	BB	BB	AA	BB	AA	AA	AA	BB	AA	AA	AA	AA	BB	AA	BB	BB	BB	BB	BB	AA	AA	AA	-
1_22069298	1	78.55562497	AA	AA	AA	BB	BB	AA	BB	BB	AA	BB	AA	AA	AA	BB	AA	AA	AA	BB	BB	AA	AA	BB	AA	AA	BB	BB	AA	BB	AA	AA	AA	BB	AA	AA	AA	AA	BB	AA	BB	BB	BB	BB	BB	AA	AA	AA	-
1_22069891	1	78.55562502	AA	AA	AA	BB	BB	AA	BB	BB	AA	BB	AA	AA	AA	BB	AA	AA	AA	BB	BB	AA	AA	BB	AA	AA	BB	BB	AA	BB	AA	AA	AA	BB	AA	AA	AA	AA	BB	AA	BB	BB	BB	BB	BB	AA	AA	AA	-
1_22071437	1	78.55562507	-	-	-	-	-	-	-	-	-	-	-	-	-	-	-	-	-	-	-	-	-	-	-	-	-	-	-	-	-	-	-	-	-	-	-	-	-	-	-	-	-	-	-	-	-	-	-
1_22073670	1	78.55562512	-	-	-	-	-	-	-	-	-	-	-	-	-	-	-	-	-	-	-	-	-	-	-	-	-	-	-	-	-	-	-	-	-	-	-	-	-	-	-	-	-	-	-	-	-	-	-
1_22078515	1	78.55562517	AA	AA	AA	BB	BB	AA	BB	BB	AA	BB	AA	AA	AA	BB	AA	AA	AA	BB	BB	AA	AA	BB	AA	AA	BB	BB	AA	BB	AA	AA	AA	BB	AA	AA	AA	AA	BB	AA	BB	BB	BB	BB	BB	AA	AA	AA	-
1_22088232	1	78.55562522	AA	AA	AA	BB	BB	AA	BB	BB	AA	BB	AA	AA	AA	BB	AA	AA	AA	BB	BB	AA	AA	BB	AA	AA	BB	BB	AA	BB	AA	AA	AA	BB	AA	AA	AA	AA	BB	AA	BB	BB	BB	BB	BB	AA	AA	AA	-
1_22097675	1	78.55562527	AA	AA	AA	BB	BB	AA	BB	BB	AA	BB	AA	AA	AA	BB	AA	AA	AA	BB	BB	AA	AA	BB	AA	AA	BB	BB	AA	BB	AA	AA	AA	BB	AA	AA	AA	AA	BB	AA	BB	BB	BB	BB	BB	AA	AA	AA	-
1_22101130	1	78.55562532	AA	AA	AA	BB	BB	AA	BB	BB	AA	BB	AA	AA	AA	BB	AA	AA	AA	BB	BB	AA	AA	BB	AA	AA	BB	BB	AA	BB	AA	AA	AA	BB	AA	AA	AA	AA	BB	AA	BB	BB	BB	BB	BB	AA	AA	AA	-
1_22117732	1	78.55562537	-	-	-	-	-	-	-	-	-	-	-	-	-	-	-	-	-	-	-	-	-	-	-	-	-	-	-	-	-	-	-	-	-	-	-	-	-	-	-	-	-	-	-	-	-	-	-
1_22138596	1	78.55562542	-	-	-	-	-	-	-	-	-	-	-	-	-	-	-	-	-	-	-	-	-	-	-	-	-	-	-	-	-	-	-	-	-	-	-	-	-	-	-	-	-	-	-	-	-	-	-
1_22149871	1	78.99227902	-	-	-	-	-	-	-	-	-	-	-	-	-	-	-	-	-	-	-	-	-	-	-	-	-	-	-	-	-	-	-	-	-	-	-	-	-	-	-	-	-	-	-	-	-	-	-
1_22177314	1	78.99227907	AA	AA	AA	BB	BB	AA	BB	BB	AA	BB	AA	AA	AA	BB	AA	AA	AA	BB	BB	AA	AA	BB	AA	AA	BB	BB	AA	BB	AA	AA	AA	BB	AA	AA	AA	AA	BB	AA	BB	BB	BB	BB	BB	AA	AA	AA	-
1_22177668	1	78.99227912	AA	AA	AA	BB	BB	AA	BB	BB	AA	BB	AA	AA	AA	BB	AA	AA	AA	BB	BB	AA	AA	BB	AA	AA	BB	BB	AA	BB	AA	AA	AA	BB	AA	AA	AA	AA	BB	AA	BB	BB	BB	BB	BB	AA	AA	AA	BB
1_22179068	1	78.99227917	AA	AA	AA	BB	BB	AA	BB	BB	AA	BB	AA	AA	AA	BB	AA	AA	AA	BB	BB	AA	AA	BB	AA	AA	BB	BB	AA	BB	AA	AA	AA	BB	AA	AA	AA	AA	BB	AA	BB	BB	BB	BB	BB	AA	AA	AA	BB
1_22179678	1	78.99227922	AA	AA	AA	BB	BB	AA	BB	BB	AA	BB	AA	AA	AA	BB	AA	AA	AA	BB	BB	AA	AA	BB	AA	AA	BB	BB	AA	BB	AA	AA	AA	BB	AA	AA	AA	AA	BB	AA	BB	BB	BB	BB	BB	AA	AA	AA	BB
1_22196382	1	78.99227927	AA	AA	AA	BB	BB	AA	BB	BB	AA	BB	AA	AA	AA	BB	AA	AA	AA	BB	BB	AA	AA	BB	AA	AA	BB	BB	AA	BB	AA	AA	AA	BB	AA	AA	AA	AA	BB	AA	BB	BB	BB	BB	BB	AA	AA	AA	BB
1_22211794	1	78.99227932	AA	AA	AA	BB	BB	AA	BB	BB	AA	BB	AA	AA	AA	BB	AA	AA	AA	BB	BB	AA	AA	-	AA	AA	BB	BB	AA	BB	AA	AA	AA	BB	AA	AA	AA	AA	BB	AA	BB	BB	BB	BB	BB	AA	AA	AA	BB
1_22247402	1	79.8650993	AA	AA	AA	BB	BB	AA	BB	BB	AA	BB	AA	AA	AA	BB	AA	AA	AA	BB	BB	AA	AA	AA	AA	AA	BB	BB	AA	BB	AA	AA	AA	BB	AA	AA	AA	AA	BB	AA	BB	BB	BB	BB	BB	AA	AA	AA	BB
1_22261628	1	79.86509935	AA	AA	AA	BB	BB	AA	BB	BB	AA	BB	AA	AA	AA	BB	AA	AA	AA	BB	BB	AA	AA	AA	AA	AA	BB	BB	AA	BB	AA	AA	AA	BB	AA	AA	AA	AA	BB	AA	BB	BB	BB	BB	BB	AA	AA	AA	BB
1_22282065	1	79.8650994	-	-	-	-	-	-	-	-	-	-	-	-	-	-	-	-	-	-	-	-	-	-	-	-	-	-	-	-	-	-	-	-	-	-	-	-	-	-	-	-	-	-	-	-	-	-	-
1_22282105	1	79.86509945	AA	AA	AA	BB	BB	AA	BB	BB	AA	BB	AA	AA	AA	BB	AA	AA	AA	BB	BB	AA	AA	AA	AA	AA	BB	BB	AA	BB	AA	AA	AA	BB	AA	AA	AA	AA	BB	AA	BB	BB	BB	BB	BB	AA	AA	AA	BB
1_22283965	1	79.8650995	-	-	-	-	-	-	-	-	-	-	-	-	-	-	-	-	-	-	-	-	-	-	-	-	-	-	-	-	-	-	-	-	-	-	-	-	-	-	-	-	-	-	-	-	-	-	-
1_22284164	1	79.86509955	AA	AA	AA	BB	BB	AA	BB	BB	AA	BB	AA	AA	AA	BB	AA	AA	AA	BB	BB	AA	AA	AA	AA	AA	BB	BB	AA	BB	AA	AA	AA	BB	AA	AA	AA	AA	BB	AA	BB	BB	BB	BB	BB	AA	AA	AA	BB
1_22284697	1	79.8650996	AA	AA	AA	BB	BB	AA	BB	BB	AA	BB	AA	AA	AA	BB	AA	AA	AA	BB	BB	AA	AA	AA	AA	AA	BB	BB	AA	BB	AA	AA	AA	BB	AA	AA	AA	AA	BB	AA	BB	BB	BB	BB	BB	AA	AA	AA	BB
1_22291943	1	79.86509965	AA	AA	AA	BB	BB	AA	BB	BB	AA	BB	AA	AA	AA	BB	AA	AA	AA	BB	BB	AA	AA	AA	AA	AA	BB	BB	AA	BB	AA	AA	AA	BB	AA	AA	AA	AA	BB	AA	BB	BB	BB	BB	BB	AA	AA	AA	BB
1_22293227	1	79.8650997	AA	AA	AA	BB	BB	AA	BB	BB	AA	BB	AA	AA	AA	BB	AA	AA	AA	BB	BB	AA	AA	AA	AA	AA	BB	BB	AA	BB	AA	AA	AA	BB	AA	AA	AA	AA	BB	AA	BB	BB	BB	BB	BB	AA	AA	AA	BB
1_22311104	1	79.86509975	AA	AA	AA	BB	BB	AA	BB	BB	AA	BB	AA	AA	AA	BB	AA	AA	AA	BB	BB	AA	AA	AA	AA	AA	BB	BB	AA	BB	AA	AA	AA	BB	AA	AA	AA	AA	BB	AA	BB	BB	BB	BB	BB	AA	AA	AA	BB
1_22312185	1	79.8650998	-	-	-	-	-	-	-	-	-	-	-	-	-	-	-	-	-	-	-	-	-	-	-	-	-	-	-	-	-	-	-	-	-	-	-	-	-	-	-	-	-	-	-	-	-	-	-
1_22324133	1	79.86509985	AA	AA	AA	BB	BB	AA	BB	BB	AA	BB	AA	AA	AA	BB	AA	AA	AA	BB	BB	AA	AA	AA	AA	AA	BB	BB	AA	BB	AA	AA	AA	BB	AA	AA	AA	AA	BB	AA	BB	BB	BB	BB	BB	AA	AA	AA	BB
1_22326427	1	79.8650999	AA	AA	AA	BB	BB	AA	BB	BB	AA	BB	AA	AA	AA	BB	AA	AA	AA	BB	BB	AA	AA	AA	AA	AA	BB	BB	AA	BB	AA	AA	AA	BB	AA	AA	AA	AA	BB	AA	BB	BB	BB	BB	BB	AA	AA	AA	BB
1_22328446	1	79.86509995	AA	AA	AA	BB	BB	AA	BB	BB	AA	BB	AA	AA	AA	BB	AA	AA	AA	BB	BB	AA	AA	AA	AA	AA	BB	BB	AA	BB	AA	AA	AA	BB	AA	AA	AA	AA	BB	AA	BB	BB	BB	BB	BB	AA	AA	AA	BB
1_22345780	1	79.8651	AA	AA	AA	BB	BB	AA	BB	BB	AA	BB	AA	AA	AA	BB	AA	AA	AA	BB	BB	AA	AA	AA	AA	AA	BB	BB	AA	BB	AA	AA	AA	BB	AA	AA	AA	AA	BB	AA	BB	BB	BB	BB	BB	AA	AA	AA	BB
1_22353314	1	79.86510005	AA	AA	AA	BB	BB	AA	BB	BB	AA	BB	AA	AA	AA	BB	AA	AA	AA	BB	BB	AA	AA	AA	AA	AA	BB	BB	AA	BB	AA	AA	AA	BB	AA	AA	AA	AA	BB	AA	BB	BB	BB	BB	BB	AA	AA	AA	BB
1_22354394	1	79.8651001	AA	AA	AA	BB	BB	AA	BB	BB	AA	BB	AA	AA	AA	BB	AA	AA	AA	BB	BB	AA	AA	AA	AA	AA	BB	BB	AA	BB	AA	AA	AA	BB	AA	AA	AA	AA	BB	AA	BB	BB	BB	BB	BB	AA	AA	AA	BB
1_22362003	1	79.86510015	AA	AA	AA	BB	BB	AA	BB	BB	AA	BB	AA	AA	AA	BB	AA	AA	AA	BB	BB	AA	AA	AA	AA	AA	BB	BB	AA	BB	AA	AA	AA	BB	AA	AA	AA	AA	BB	AA	BB	BB	BB	BB	BB	AA	AA	AA	BB
1_22363756	1	79.8651002	AA	AA	AA	BB	BB	AA	BB	BB	AA	BB	AA	AA	AA	BB	AA	AA	AA	BB	BB	AA	AA	AA	AA	AA	BB	BB	AA	BB	AA	AA	AA	BB	AA	AA	AA	AA	BB	AA	BB	BB	BB	BB	BB	AA	AA	AA	BB
1_22369502	1	79.86510025	AA	AA	AA	BB	BB	AA	BB	BB	AA	BB	AA	AA	AA	BB	AA	AA	AA	BB	BB	AA	AA	AA	AA	AA	BB	BB	AA	BB	AA	AA	AA	BB	AA	AA	AA	AA	BB	AA	BB	BB	BB	BB	BB	AA	AA	AA	BB
1_22376990	1	79.8651003	-	-	-	-	-	-	-	-	-	-	-	-	-	-	-	-	-	-	-	-	-	-	-	-	-	-	-	-	-	-	-	-	-	-	-	-	-	-	-	-	-	-	-	-	-	-	-
1_22378504	1	79.86510035	AA	AA	AA	BB	BB	AA	BB	BB	AA	BB	AA	AA	AA	BB	AA	AA	AA	BB	BB	AA	AA	AA	AA	AA	BB	BB	AA	BB	AA	AA	AA	BB	AA	AA	AA	AA	BB	AA	BB	BB	BB	BB	BB	AA	AA	AA	BB
1_22380983	1	79.8651004	-	-	-	-	-	-	-	-	-	-	-	-	-	-	-	-	-	-	-	-	-	-	-	-	-	-	-	-	-	-	-	-	-	-	-	-	-	-	-	-	-	-	-	-	-	-	-
1_22381046	1	79.86510045	-	-	-	-	-	-	-	-	-	-	-	-	-	-	-	-	-	-	-	-	-	-	-	-	-	-	-	-	-	-	-	-	-	-	-	-	-	-	-	-	-	-	-	-	-	-	-
1_22381929	1	79.8651005	AA	AA	AA	BB	BB	AA	BB	BB	AA	BB	AA	AA	AA	BB	AA	AA	AA	BB	BB	AA	AA	AA	AA	AA	BB	BB	AA	BB	AA	AA	AA	BB	AA	AA	AA	AA	BB	AA	BB	BB	BB	BB	BB	AA	AA	AA	BB
1_22382076	1	79.86510055	-	-	-	-	-	-	-	-	-	-	-	-	-	-	-	-	-	-	-	-	-	-	-	-	-	-	-	-	-	-	-	-	-	-	-	-	-	-	-	-	-	-	-	-	-	-	-
1_22388703	1	80.08683991	AA	AA	AA	BB	BB	AA	BB	BB	AA	BB	AA	AA	AA	BB	AA	AA	AA	BB	BB	AA	AA	AA	AA	AA	BB	BB	AA	BB	AA	AA	AA	BB	AA	AA	AA	AA	BB	AA	BB	BB	BB	BB	BB	AA	AA	AA	BB
1_22388868	1	80.08683996	AA	AA	AA	BB	BB	AA	BB	BB	AA	BB	AA	AA	AA	BB	AA	AA	AA	BB	BB	AA	AA	AA	AA	AA	BB	BB	AA	BB	AA	AA	AA	BB	AA	AA	AA	AA	BB	AA	BB	BB	BB	BB	BB	AA	AA	AA	BB
1_22441168	1	80.08684001	AA	AA	AA	BB	BB	AA	BB	BB	AA	BB	AA	AA	AA	BB	AA	AA	AA	BB	BB	AA	AA	AA	AA	AA	BB	BB	AA	BB	AA	AA	AA	BB	AA	AA	AA	AA	BB	AA	BB	BB	BB	BB	BB	AA	AA	AA	BB
1_22446915	1	80.08684006	AA	AA	AA	BB	BB	AA	BB	BB	AA	BB	AA	AA	AA	BB	AA	AA	AA	BB	BB	AA	AA	AA	AA	AA	BB	BB	AA	BB	AA	AA	AA	BB	AA	AA	AA	AA	BB	AA	BB	BB	BB	BB	BB	AA	AA	AA	BB
1_22464638	1	80.08684011	AA	AA	AA	BB	BB	AA	BB	BB	AA	BB	AA	AA	AA	BB	AA	AA	AA	BB	BB	AA	AA	AA	AA	AA	BB	BB	AA	BB	AA	AA	AA	BB	AA	AA	AA	AA	BB	AA	BB	BB	BB	BB	BB	AA	AA	AA	BB
1_22470598	1	80.15891026	AA	AA	AA	BB	BB	AA	BB	BB	AA	BB	AA	AA	AA	BB	AA	AA	AA	BB	BB	AA	AA	AA	AA	AA	BB	BB	AA	BB	AA	AA	AA	BB	AA	AA	AA	AA	BB	AA	BB	BB	BB	BB	BB	AA	AA	AA	BB
1_22489615	1	80.15891031	AA	AA	AA	BB	BB	AA	BB	BB	AA	BB	AA	AA	AA	BB	AA	AA	AA	BB	BB	AA	AA	AA	AA	AA	BB	BB	AA	BB	AA	AA	AA	BB	AA	AA	AA	AA	BB	AA	BB	BB	BB	BB	BB	AA	AA	AA	BB
1_22493403	1	80.15891036	AA	AA	AA	BB	BB	AA	BB	BB	AA	BB	AA	AA	AA	BB	AA	AA	AA	BB	BB	AA	AA	AA	AA	AA	BB	BB	AA	BB	AA	AA	AA	BB	AA	AA	AA	AA	BB	AA	BB	BB	BB	BB	BB	AA	AA	AA	BB
1_22495987	1	80.15891041	AA	AA	AA	BB	BB	AA	BB	BB	AA	BB	AA	AA	AA	BB	AA	AA	AA	BB	BB	AA	AA	AA	AA	AA	BB	BB	AA	BB	AA	AA	AA	BB	AA	AA	AA	AA	BB	AA	BB	BB	BB	BB	BB	AA	AA	AA	BB
1_22511298	1	80.15891046	AA	AA	AA	BB	BB	AA	BB	BB	AA	BB	AA	AA	AA	BB	AA	AA	AA	BB	BB	AA	AA	AA	AA	AA	BB	BB	AA	BB	AA	AA	AA	BB	AA	AA	AA	AA	BB	AA	BB	BB	BB	BB	BB	AA	AA	AA	BB
1_22526342	1	80.15891051	AA	AA	AA	BB	BB	AA	BB	BB	AA	BB	AA	AA	AA	BB	AA	AA	AA	BB	BB	AA	AA	AA	AA	AA	BB	BB	AA	BB	AA	AA	AA	BB	AA	AA	AA	AA	BB	AA	BB	BB	BB	BB	BB	AA	AA	AA	BB
1_22527369	1	80.35619849	AA	AA	AA	BB	BB	AA	BB	BB	AA	BB	AA	AA	AA	BB	AA	AA	AA	BB	BB	AA	AA	AA	AA	AA	BB	BB	AA	BB	AA	AA	AA	BB	AA	AA	AA	AA	BB	AA	BB	BB	BB	BB	BB	AA	AA	AA	BB
1_22529435	1	80.35619854	AA	AA	AA	BB	BB	AA	BB	BB	AA	BB	AA	AA	AA	BB	AA	AA	AA	BB	BB	AA	AA	AA	AA	AA	BB	BB	AA	BB	AA	AA	AA	BB	AA	AA	AA	AA	BB	AA	BB	BB	BB	BB	BB	AA	AA	AA	BB
1_22530149	1	80.35619859	AA	AA	AA	BB	BB	AA	BB	BB	AA	BB	AA	AA	AA	BB	AA	AA	AA	BB	BB	AA	AA	AA	AA	AA	BB	BB	AA	BB	AA	AA	AA	BB	AA	AA	AA	AA	BB	AA	BB	BB	BB	BB	BB	AA	AA	AA	BB
1_22531572	1	80.35619864	AA	AA	AA	BB	BB	AA	BB	BB	AA	BB	AA	AA	AA	BB	AA	AA	AA	BB	BB	AA	AA	AA	AA	AA	BB	BB	AA	BB	AA	AA	AA	BB	AA	AA	AA	AA	BB	AA	BB	BB	BB	BB	BB	AA	AA	AA	BB
1_22537038	1	80.35619869	-	-	-	-	-	-	-	-	-	-	-	-	-	-	-	-	-	-	-	-	-	-	-	-	-	-	-	-	-	-	-	-	-	-	-	-	-	-	-	-	-	-	-	-	-	-	-
1_22540185	1	80.35619874	AA	AA	AA	BB	BB	AA	BB	BB	AA	BB	AA	AA	AA	BB	AA	AA	AA	BB	BB	AA	AA	AA	AA	AA	BB	BB	AA	BB	AA	AA	AA	BB	AA	AA	AA	AA	BB	AA	BB	BB	BB	BB	BB	AA	AA	AA	BB
1_22553931	1	80.35619879	-	-	-	-	-	-	-	-	-	-	-	-	-	-	-	-	-	-	-	-	-	-	-	-	-	-	-	-	-	-	-	-	-	-	-	-	-	-	-	-	-	-	-	-	-	-	-
1_22570285	1	80.35619884	AA	AA	AA	BB	BB	AA	BB	BB	AA	BB	AA	AA	AA	BB	AA	AA	AA	BB	BB	AA	AA	AA	AA	AA	BB	BB	AA	BB	AA	AA	AA	BB	AA	AA	AA	AA	BB	AA	BB	BB	BB	BB	BB	AA	AA	AA	BB
1_22570633	1	80.35619889	AA	AA	AA	BB	BB	AA	BB	BB	AA	BB	AA	AA	AA	BB	AA	AA	AA	BB	BB	AA	AA	AA	AA	AA	BB	BB	AA	BB	AA	AA	AA	BB	AA	AA	AA	AA	BB	AA	BB	BB	BB	BB	BB	AA	AA	AA	BB
1_22574646	1	80.35619894	AA	AA	AA	BB	BB	AA	BB	BB	AA	BB	AA	AA	AA	BB	AA	AA	AA	BB	BB	AA	AA	AA	AA	AA	BB	BB	AA	BB	AA	AA	AA	BB	AA	AA	AA	AA	BB	AA	BB	BB	BB	BB	BB	AA	AA	AA	BB
1_22586262	1	80.35619899	AA	AA	AA	BB	BB	AA	BB	BB	AA	BB	AA	AA	AA	BB	AA	AA	AA	BB	BB	AA	AA	AA	AA	AA	BB	BB	AA	BB	AA	AA	AA	BB	AA	AA	AA	AA	BB	AA	BB	BB	BB	BB	BB	AA	AA	AA	BB
1_22609513	1	80.35619904	AA	AA	AA	BB	BB	AA	BB	BB	AA	BB	AA	AA	AA	BB	AA	AA	AA	BB	BB	AA	AA	AA	AA	AA	BB	BB	AA	BB	AA	AA	AA	BB	AA	AA	AA	AA	BB	AA	BB	BB	BB	BB	BB	AA	AA	AA	BB
1_22628689	1	80.35619909	AA	AA	AA	BB	BB	AA	BB	BB	AA	BB	AA	AA	AA	BB	AA	AA	AA	BB	BB	AA	AA	AA	AA	AA	BB	BB	AA	BB	AA	AA	AA	BB	AA	AA	AA	AA	BB	AA	BB	BB	BB	BB	BB	AA	AA	AA	BB
1_22630588	1	80.35619914	AA	AA	AA	BB	BB	AA	BB	BB	AA	BB	AA	AA	AA	BB	AA	AA	AA	BB	BB	AA	AA	AA	AA	AA	BB	BB	AA	BB	AA	AA	AA	BB	AA	AA	AA	AA	BB	AA	BB	BB	BB	BB	BB	AA	AA	AA	BB
1_22697429	1	80.35619919	AA	AA	AA	BB	BB	AA	BB	BB	-	BB	AA	AA	AA	BB	AA	AA	AA	BB	BB	AA	AA	AA	AA	AA	BB	BB	AA	BB	AA	AA	AA	BB	AA	AA	AA	AA	BB	AA	BB	BB	BB	BB	BB	AA	AA	AA	BB
1_22700393	1	80.35619924	-	-	-	-	-	-	-	-	-	-	-	-	-	-	-	-	-	-	-	-	-	-	-	-	-	-	-	-	-	-	-	-	-	-	-	-	-	-	-	-	-	-	-	-	-	-	-
1_22703055	1	80.35619929	-	-	-	-	-	-	-	-	-	-	-	-	-	-	-	-	-	-	-	-	-	-	-	-	-	-	-	-	-	-	-	-	-	-	-	-	-	-	-	-	-	-	-	-	-	-	-
1_22705033	1	80.35619934	AA	AA	AA	BB	BB	AA	BB	BB	-	BB	AA	AA	AA	BB	AA	AA	AA	BB	BB	AA	AA	AA	AA	AA	BB	BB	AA	BB	AA	AA	AA	BB	AA	AA	AA	AA	BB	AA	BB	BB	BB	BB	BB	AA	AA	AA	BB
1_22710693	1	80.58108585	AA	AA	AA	BB	BB	AA	BB	BB	-	BB	AA	AA	AA	BB	AA	AA	AA	BB	BB	AA	AA	AA	AA	AA	BB	BB	AA	BB	AA	AA	AA	BB	AA	AA	AA	AA	BB	AA	BB	BB	BB	BB	BB	AA	AA	AA	BB
1_22718135	1	80.5810859	AA	AA	AA	BB	BB	AA	BB	BB	-	BB	AA	AA	AA	BB	AA	AA	AA	BB	BB	AA	AA	AA	AA	AA	BB	BB	AA	BB	AA	AA	AA	BB	AA	AA	AA	AA	BB	AA	BB	BB	BB	BB	BB	AA	AA	AA	BB
1_22719270	1	80.58108595	AA	AA	AA	BB	BB	AA	BB	BB	-	BB	AA	AA	AA	BB	AA	AA	AA	BB	BB	AA	AA	AA	AA	AA	BB	BB	AA	BB	AA	AA	AA	BB	AA	AA	AA	AA	BB	AA	BB	BB	BB	BB	BB	AA	AA	AA	BB
1_22719560	1	80.581086	AA	AA	AA	BB	BB	AA	BB	BB	-	BB	AA	AA	AA	BB	AA	AA	AA	BB	BB	AA	AA	AA	AA	AA	BB	BB	AA	BB	AA	AA	AA	BB	AA	AA	AA	AA	BB	AA	BB	BB	BB	BB	BB	AA	AA	AA	BB
1_22721248	1	80.58108605	AA	AA	AA	BB	BB	AA	BB	BB	BB	BB	AA	AA	AA	BB	AA	AA	AA	BB	BB	AA	AA	AA	AA	AA	BB	BB	AA	BB	AA	AA	AA	BB	AA	AA	AA	AA	BB	AA	BB	BB	BB	BB	BB	AA	AA	AA	BB
1_22729015	1	80.5810861	AA	AA	AA	BB	BB	AA	BB	BB	BB	BB	AA	AA	AA	BB	AA	AA	AA	BB	BB	AA	AA	AA	AA	AA	BB	BB	AA	BB	AA	AA	AA	BB	AA	AA	AA	AA	BB	AA	BB	BB	BB	BB	BB	AA	AA	AA	BB
1_22729241	1	80.58108615	AA	AA	AA	BB	BB	AA	BB	BB	BB	BB	AA	AA	AA	BB	AA	AA	AA	BB	BB	AA	AA	AA	AA	AA	BB	BB	AA	BB	AA	AA	AA	BB	AA	AA	AA	AA	BB	AA	BB	BB	BB	BB	BB	AA	AA	AA	BB
1_22729863	1	80.5810862	AA	AA	AA	BB	BB	AA	BB	BB	BB	BB	AA	AA	AA	BB	AA	AA	AA	BB	BB	AA	AA	AA	AA	AA	BB	BB	AA	BB	AA	AA	AA	BB	AA	AA	AA	AA	BB	AA	BB	BB	BB	BB	BB	AA	AA	AA	BB
1_22730543	1	80.58108625	AA	AA	AA	BB	BB	AA	BB	BB	BB	BB	AA	AA	AA	BB	AA	AA	AA	BB	BB	AA	AA	AA	AA	AA	BB	BB	AA	BB	AA	AA	AA	BB	AA	AA	AA	AA	BB	AA	BB	BB	BB	BB	BB	AA	AA	AA	BB
1_22735874	1	80.5810863	-	-	-	-	-	-	-	-	-	-	-	-	-	-	-	-	-	-	-	-	-	-	-	-	-	-	-	-	-	-	-	-	-	-	-	-	-	-	-	-	-	-	-	-	-	-	-
1_22737640	1	80.58108635	AA	AA	AA	BB	BB	AA	BB	BB	BB	BB	AA	AA	AA	BB	AA	AA	AA	BB	BB	AA	AA	AA	AA	AA	BB	BB	AA	BB	AA	AA	AA	BB	AA	AA	AA	AA	BB	AA	BB	BB	BB	BB	BB	AA	AA	AA	BB
1_22738924	1	80.5810864	AA	AA	AA	BB	BB	AA	BB	BB	BB	BB	AA	AA	AA	BB	AA	AA	AA	BB	BB	AA	AA	AA	AA	AA	BB	BB	AA	BB	AA	AA	AA	BB	AA	AA	AA	AA	BB	AA	BB	BB	BB	BB	BB	AA	AA	AA	BB
1_22742445	1	80.58108645	AA	AA	AA	BB	BB	AA	BB	BB	BB	BB	AA	AA	AA	BB	AA	AA	AA	BB	BB	AA	AA	AA	AA	AA	BB	BB	AA	BB	AA	AA	AA	BB	AA	AA	AA	AA	BB	AA	BB	BB	BB	BB	BB	AA	AA	AA	BB
1_22744494	1	80.5810865	AA	AA	AA	BB	BB	AA	BB	BB	BB	BB	AA	AA	AA	BB	AA	AA	AA	BB	BB	AA	AA	AA	AA	AA	BB	BB	AA	BB	AA	AA	AA	BB	AA	AA	AA	AA	BB	AA	BB	BB	BB	BB	BB	AA	AA	AA	BB
1_22745390	1	80.58108655	-	-	-	-	-	-	-	-	-	-	-	-	-	-	-	-	-	-	-	-	-	-	-	-	-	-	-	-	-	-	-	-	-	-	-	-	-	-	-	-	-	-	-	-	-	-	-
1_22767905	1	80.5810866	AA	AA	AA	BB	BB	AA	BB	BB	BB	BB	AA	AA	AA	BB	AA	AA	AA	BB	BB	AA	AA	AA	AA	AA	BB	BB	AA	BB	AA	AA	AA	BB	AA	AA	AA	AA	BB	AA	BB	BB	BB	BB	BB	AA	AA	AA	BB
1_22769384	1	80.58108665	AA	AA	AA	BB	BB	AA	BB	BB	BB	BB	AA	AA	AA	BB	AA	AA	AA	BB	BB	AA	AA	AA	AA	AA	BB	BB	AA	BB	AA	AA	AA	BB	AA	AA	AA	AA	BB	AA	BB	BB	BB	BB	BB	AA	AA	AA	BB
1_22779812	1	80.5810867	AA	AA	AA	BB	BB	AA	BB	BB	BB	BB	AA	AA	AA	BB	AA	AA	AA	BB	BB	AA	AA	AA	AA	AA	BB	BB	AA	BB	AA	AA	AA	BB	AA	AA	AA	AA	BB	AA	BB	BB	BB	BB	BB	AA	AA	AA	BB
1_22785456	1	80.58108675	AA	AA	AA	BB	BB	AA	BB	BB	BB	BB	AA	AA	AA	BB	AA	AA	AA	BB	BB	AA	AA	AA	AA	AA	BB	BB	AA	BB	AA	AA	AA	BB	AA	AA	AA	AA	BB	AA	BB	BB	BB	BB	BB	AA	AA	AA	BB
1_22791941	1	80.5810868	AA	AA	AA	BB	BB	AA	BB	BB	BB	BB	AA	AA	AA	BB	AA	AA	AA	BB	BB	AA	AA	AA	AA	AA	BB	BB	AA	BB	AA	AA	AA	BB	AA	AA	AA	AA	BB	AA	BB	BB	BB	BB	BB	AA	AA	AA	BB
1_22796470	1	80.99393723	AA	AA	AA	BB	BB	AA	BB	BB	BB	BB	-	AA	AA	BB	AA	AA	AA	-	BB	-	AA	AA	AA	AA	BB	BB	AA	-	AA	AA	AA	BB	AA	AA	AA	AA	BB	AA	BB	BB	BB	BB	BB	AA	AA	-	BB
1_22804731	1	80.99393728	AA	AA	AA	BB	BB	AA	BB	BB	BB	BB	-	AA	AA	BB	AA	AA	AA	-	BB	-	AA	AA	AA	AA	BB	BB	AA	-	AA	AA	AA	BB	AA	AA	AA	AA	BB	AA	BB	BB	BB	BB	BB	AA	AA	-	BB
1_22807848	1	80.99393733	AA	AA	AA	BB	BB	AA	BB	BB	BB	BB	-	AA	AA	BB	AA	AA	AA	-	BB	-	AA	AA	AA	AA	BB	BB	AA	-	AA	AA	AA	BB	AA	AA	AA	AA	BB	AA	BB	BB	BB	BB	BB	AA	AA	-	BB
1_22815710	1	80.99393738	AA	AA	AA	BB	BB	AA	BB	BB	BB	BB	-	AA	AA	BB	AA	AA	AA	-	BB	-	AA	AA	AA	AA	BB	BB	AA	-	AA	AA	AA	BB	AA	AA	AA	AA	BB	AA	BB	BB	BB	BB	BB	AA	AA	-	BB
1_22821811	1	80.99393743	AA	AA	AA	BB	BB	AA	BB	BB	BB	BB	-	AA	AA	BB	AA	AA	AA	-	BB	-	AA	AA	AA	AA	BB	BB	AA	-	AA	AA	AA	BB	AA	AA	AA	AA	BB	AA	BB	BB	BB	BB	BB	AA	AA	-	BB
1_22823730	1	80.99393748	AA	AA	AA	BB	BB	AA	BB	BB	BB	BB	-	AA	AA	BB	AA	AA	AA	-	BB	-	AA	AA	AA	AA	BB	BB	AA	-	AA	AA	AA	BB	AA	AA	AA	AA	BB	AA	BB	BB	BB	BB	BB	AA	AA	-	BB
1_22827214	1	80.99393753	AA	AA	AA	BB	BB	AA	BB	BB	BB	BB	-	AA	AA	BB	AA	AA	AA	-	BB	-	AA	AA	AA	AA	BB	BB	AA	-	AA	AA	AA	BB	AA	AA	AA	AA	BB	AA	BB	BB	BB	BB	BB	AA	AA	-	BB
1_22830204	1	80.99393758	AA	AA	AA	BB	BB	AA	BB	BB	BB	BB	-	AA	AA	BB	AA	AA	AA	-	BB	-	AA	AA	AA	AA	BB	BB	AA	-	AA	AA	AA	BB	AA	AA	AA	AA	BB	AA	BB	BB	BB	BB	BB	AA	AA	-	BB
[truncated: 8,669 more rows]
[truncated: 960 more columns]
